# Supplementary material for: Proteomic Sensors for Quantitative, Multiplexed and Spatial Monitoring of Kinase Signaling
Source: bioRxiv preprint, doi:10.1101/2024.12.16.628391, version 2 (2025-03-13)
Supplement: Supplemental tables 1 through 5 [file 628391_file16.xlsx]

## Sheet: Legend
Data Table	Name	Contents
SD1	Targeting Elements	DNA sequences coding for targeting elements used in this study. Codon optimized for human expression.
SD2	MKS Sequences	DNA sequences coding for multiplexed kinase sensors (MKS) used in this study. Codon optimized for human expression.
SD3	CPT Phosphoproteome	Results of a phosphoproteomic screen looking for CPT-induced phosphorylation sites in HCT116 cells. Bowtie filtered. Sites in Q1 are CPT-induced, whereas sites in Q3 are CPT-reduced. Sites in CENTER are unchanged by CPT treatment.
SD4	ATRi Phosphoproteome	Results of a phosphoproteomic screen looking for ATR-dependent phosphorylation sites induced by CPT in HCT116 cells. Sites with low Median Ratios are ATR-dependent.
SD5	CHK1 Sensor Summary	Summary table of initial DDA analysis for 10 de novo CHK1 sensor candidates, of which 2 were found to be phosphorylated. Raw data is available upon request.

## Sheet: SD1 Targeting Elements
Targeting Element	DNA Sequence
NLS	GGCAAGAGAAAGCTGATCACCAGCGAGGAAGAGCGGTCCCCTGCCAAGCGGGGCAGAAAAAGC
NES	CTGCAGCTGCCCCCCCTGGAGAGGCTGACCCTG
PCNA	TTCGAGGCGCGCCTGGTCcagggctccatcctcaagaaggtgttggaggcactcaaggacctcatcaacgaggcctgctgggatattagctccagcggtgtaaacctgcagagcatggactcgtcccacgtctctttggtgcagctcaccctgcggtctgagggcttcgacacctaccgctgcgaccgcaacctggccatgggcgtgaacctcaccagtatgtccaaaatactaaaatgcgccggcaatgaagatatcattacactaagggccgaagataacgcggataccttggcgctagtatttgaagcaccaaaccaggagaaagtttcagactatgaaatgaagttgatggatttagatgttgaacaacttggaattccagaacaggagtacagc…

## Sheet: SD2 MKS Sequences
MKS	Sequence
ATR, ATM, CHK1. AGA-coded	GCGGGGGGTAGCGGGGCGAGAGCTGGAGCAGATGGAGGACCTGTGACGTCACAGGAAAGTGGCCAGAGAGCCGGCGGATCCGGAGCACGAGCCGGAGCGGTTGAACAGGACAGCTCACAGCCCTCCCTTCCTTTGGTTCGGGCGGGTGGTTCCGGTGCTCGAGCTATAGAGAAATATCCTTCAGATGGTGATCAAGCTGGGGCGCGCGCCGGTGGGTCAGGAGCACGAAGCCTTGACGGAGTAACCAACGATGCTGGCGCGCGAGCTGGTGGTTCCGGAGCCCGG
ATR, ATM, CHK1. GAG-coded	GCCGGAGGTTCAGGTGCTAGAGGTGCGGGTGATGGCGGCCCTGTTACAAGTCAAGAATCAGGCCAGCGAGCTGGTGGATCCGGAGCTAGGGGGGCAGGCGTGGAGCAAGACAGTAGTCAACCTAGTCTCCCACTTGTGCGAGCTGGGGGAAGTGGAGCTAGAGCTATAGAGAAGTACCCTAGTGATGGAGATCAGGGTGCGGGCAGAGCAGGCGGCTCAGGTGCTAGGTCACTGGACGGGGTCACGAATGACGGAGCTGGAAGAGCAGGAGGGAGTGGTGCTCGA
ATR, ATM, CHK1. GVG-coded	GCGGGAGGTAGTGGCGCCCGAGGTGTTGGAGATGGAGGTCCTGTGACCAGCCAGGAAAGTGGTCAGAGAGCTGGGGGGAGCGGGGCTCGCGGAGTTGGCGTTGAGCAGGACTCTTCTCAGCCCAGTCTTCCGTTGGTCAGAGCAGGCGGAAGTGGAGCGAGGGCAATAGAGAAATACCCTAGTGACGGGGATCAGGGCGTCGGCAGAGCGGGGGGGAGTGGTGCGAGATCCCTGGATGGAGTTACAAACGATGGTGTGGGTCGAGCCGGAGGTAGTGGAGCCAGA
ATR, ATM candidates	ACCATCCCTAGCTGGGCCACACTGTCTGCTAGCCAGCTGGCCAGAGATGGCGGCCCTGTGACCAGCCAGGAGTCCGGCCAGAAGGAACTGCCTACCGTGACCACCAACGTGCAGAACAGCCAGGACAAGTCCATCGAGAAGATCGACATCAGCCCCTCTACATTCCGGCTCAGACTGAGCCCTTCTCCAACAAGCCAGCGGCTGGTCCCCTCCCAGGAGGAAACCAAACTGAGCGTGGAAGAAAGCGAGGCCGCCGGCGATGGAGTGGACACCAAGGGCGGCGACAGCATCGGCGAGACACCTACACCCGGCGCCAGCAAGGACCACACCCCTAGCCAAGAGCTGGCTCTGACCCAGAGCGTGGGCGGAGATAGCTCTGCCGACAGA
CHK1 Candidates	gcacgggctttggaaaggcacaattccgaccaaggtggtgcgggtgccagagcgtttaatcacaacccaagtgaaaacggtcaggcgggagcacgcgcgctgaaccacaatccgtccggtcaggagtatgctggagccagggccattgaaaagtatcctagtgacggggatcaggcaggagctagagccctggttaacgccccatcagatggaaacggggcgggggctagagccattaatcataatcccagcgatcaactctatgcgggggctagggccatagtccactatccgtcagaccccccaaatgcaggagccagagctatcatacattatccgagtgataatgtgaacgccggtgcgagagcgctggaaccctacccatctaacgacatcaac…
ATR, ATM, CHK1. AGA-coded, inverted order	GCCGGAGGATCAGGAGCAAGATCTTTGGATGGAGTAACTAATGACGCAGGAGCGCGGGCCGGCGGATCTGGTGCGCGCGCTATAGAGAAGTACCCAAGCGACGGAGATCAGGCAGGCGCAAGAGCAGGGGGGTCCGGTGCTCGAGCGGGCGCTGTCGAGCAGGACTCTAGTCAGCCGAGTCTCCCCCTCGTTAGAGCAGGTGGGTCTGGAGCTCGCGCGGGTGCGGATGGTGGTCCAGTAACCTCTCAAGAATCAGGTCAGCGGGCCGGGGGTAGTGGTGCCAGA

## Sheet: SD3 CPT Phosphoproteome
protein_site	cluster_pep.FWD	cluster_pep.REV	FWD Median Ratio	REV Median Ratio	FWD PSMs	REV PSMs	protein	stq_sites	quadr	bestpp.FWD	bestpp.REV	bestprb.FWD	bestprb.REV	phos_seq
sp|A0A0B4J2F2|SIK1B_HUMAN_575	R.RASphosDTSLTQGLK.A	R.RASphosDTSLTQGLK.A	-6.64	2.76474	1	1	sp|A0A0B4J2F2|SIK1B_HUMAN	STYX	Q1	0.9989	0.9999	0.973	0.971	GAVLLPVSFQEGRRASDTSLTQGLKAFRQQL
sp|P52597|HNRPF_HUMAN_187	R.YIEVFKSSphosQEEVR.S	K.SSphosQEEVR.S	-6.64	1.9425	1	2	sp|P52597|HNRPF_HUMAN	STYQ	Q1	1	1	0.903	0.957	HKERIGHRYIEVFKSSQEEVRSYSDPPLKFM
sp|A4D2P6|GRD2I_HUMAN_1171 1172 1173 1185_C	K.A(TTS)phosEAFFGIFAEFMSphosKFER.A	K.A(TTS)phosEAFFGIFAEFMSphosKFER.A	-6.64	-6.5956	1	1	sp|A4D2P6|GRD2I_HUMAN	STYX	Q4	0.9675	0.9255	1.332	1.335	ELGKALAFFGEDSKATTSEAFFGIFAEFMSK LGKALAFFGEDSKATTSEAFFGIFAEFMSKF GKALAFFGEDSKATTSEAFFGIFAEFMSKFE ATTSEAFFGIFAEFMSKFERALSDLQAGEGL
sp|A8K979|ERI2_HUMAN_326 327 333_C	K.(SS)phosLPLFNTphosK.S	K.(SS)phosLPLFNTphosK.S	-6.64	-4.78288	2	2	sp|A8K979|ERI2_HUMAN	STYX	Q4	0.9813	0.9927	1.236	1.19	LQVKNNIKASLHNVKSSLPLFNTKSSTSVGQ QVKNNIKASLHNVKSSLPLFNTKSSTSVGQL KASLHNVKSSLPLFNTKSSTSVGQLQSPTLN
sp|O14523|C2C2L_HUMAN_419 420 421 422_C	R.NLGTP(TSST)phosPRPSITPTK.K	R.NLGTP(TSST)phosPRPSITPTK.K	-6.64	-6.5956	1	3	sp|O14523|C2C2L_HUMAN	STYX	Q4	0.9904	0.9843	0.437	0.933	ELHYEEGSPRNLGTPTSSTPRPSITPTKKIE LHYEEGSPRNLGTPTSSTPRPSITPTKKIEL HYEEGSPRNLGTPTSSTPRPSITPTKKIELD YEEGSPRNLGTPTSSTPRPSITPTKKIELDR
sp|O15479|MAGB2_HUMAN_77 78 79_C	R.APTTAAAAAAGV(SST)phosK.S	R.APTTAAAAAAGV(SST)phosK.S	-6.64	-6.5956	3	9	sp|O15479|MAGB2_HUMAN	STYX	Q4	0.996	1	0.994	0.999	PQRAPTTAAAAAAGVSSTKSKKGAKSHQGEK QRAPTTAAAAAAGVSSTKSKKGAKSHQGEKN RAPTTAAAAAAGVSSTKSKKGAKSHQGEKNA
sp|O43493|TGON2_HUMAN_263	R.KDHSphosKPISNPSDNK.E	R.KDHSphosKPISNPSDNK.E	-6.64	-6.5956	1	2	sp|O43493|TGON2_HUMAN	STYX	Q4	0.9945	0.9917	0.498	0.497	SPNKVVPEQPSRKDHSKPISNPSDNKELPKA
sp|O60784|TOM1_HUMAN_473	R.LPNLSSPSAEGPPGPPSphosGPAPR.K	R.LPNLSSPSAEGPPGPPSphosGPAPR.K	-6.64	-6.64	1	1	sp|O60784|TOM1_HUMAN	STYX	Q4	0.9757	0.9097	0.792	0.837	PNLSSPSAEGPPGPPSGPAPRKKTQEKDDDM
sp|O95602|RPA1_HUMAN_505 508 513	R.TphosALSphosAVDMTphosQREAVAK.Q	R.TphosALSphosAVDMTphosQREAVAK.Q	-6.64	-6.5956	1	3	sp|O95602|RPA1_HUMAN	STYQ	Q4	0.9253	0.9537	1	1	VHPGASMVINEDGSRTALSAVDMTQREAVAK GASMVINEDGSRTALSAVDMTQREAVAKQLL INEDGSRTALSAVDMTQREAVAKQLLTPATG
sp|P17844|DDX5_HUMAN_4 5 6_C	M.SG(YSS)phosDRDR.G	M.SG(YSS)phosDRDR.G	-6.64	-6.5956	2	2	sp|P17844|DDX5_HUMAN	STYX	Q4	0.994	0.991	0.981	0.999	____________MSGYSSDRDRGRDRGFGAP ___________MSGYSSDRDRGRDRGFGAPR __________MSGYSSDRDRGRDRGFGAPRF
sp|P18615|NELFE_HUMAN_181	R.SGAHSSASphosPPR.S	R.SGAHSSASphosPPR.S	-6.64	-6.5956	15	16	sp|P18615|NELFE_HUMAN	STYX	Q4	0.9997	1	0.997	0.995	FDWGYEERSGAHSSASPPRSRSRDRSHERNR
sp|P27816|MAP4_HUMAN_631	K.GISEDSHLESLQDVGQSAAPTFMISPETVTGTphosGKK.C	K.GISEDSHLESLQDVGQSAAPTFMISPETVTGTphosGKK.C	-6.64	-5.73311	3	1	sp|P27816|MAP4_HUMAN	STYX	Q4	0.996	0.9465	0.983	0.96	SAAPTFMISPETVTGTGKKCSLPAEEDSVLE
sp|P46013|KI67_HUMAN_827	K.CSASphosPPLRR.Q	K.CSASphosPPLRR.Q	-6.64	-6.5956	8	24	sp|P46013|KI67_HUMAN	STYX	Q4	0.9998	1	0.991	0.992	SAQNAAKQPSDKCSASPPLRRQCIRENGNVA
sp|P48382|RFX5_HUMAN_356 357_C	R.L(SS)phosGALK.V	R.L(SS)phosGALK.V	-6.64	-6.5956	1	2	sp|P48382|RFX5_HUMAN	STYX	Q4	0.9729	0.9869	1	1	IPPIPVSPPILAPRLSSGALKVATLPLSSRA PPIPVSPPILAPRLSSGALKVATLPLSSRAG
sp|Q5T2S8|ARMC4_HUMAN_116	R.LLLIAKTphosGKLK.E	R.LLLIAKTphosGKLK.E	-6.64	-6.5956	6	4	sp|Q5T2S8|ARMC4_HUMAN	STYX	Q4	0.9856	0.9542	1	1	IRSFGQLSRLLLIAKTGKLKEAQACVEANRD
sp|Q68DA7|FMN1_HUMAN_654	R.DGGAWVLGYphosR.A	R.DGGAWVLGYphosR.A	-6.64	-6.64	1	3	sp|Q68DA7|FMN1_HUMAN	STYX	Q4	0.9281	0.9928	1	1	PKDLPNRDGGAWVLGYRAGPACPFLLHEERE
sp|Q8TF01|PNISR_HUMAN_726	R.SGSphosISVK.L	R.SGSphosISVK.L	-6.64	-4.41118	3	1	sp|Q8TF01|PNISR_HUMAN	STYX	Q4	0.9903	0.9784	0.992	0.985	LKRKRESERTFSRSGSISVKIIRHDSRQDSK
sp|Q8WXA9|SREK1_HUMAN_427	K.ERDHISphosER.R	K.ERDHISphosER.R	-6.64	-3.49443	2	4	sp|Q8WXA9|SREK1_HUMAN	STYX	Q4	0.9837	0.9931	1	1	RNKKDKKREKERDHISERRERERSTSMRKSS
sp|Q96I34|PP16A_HUMAN_418	R.VGGSphosPVR.H	R.VGGSphosPVR.H	-6.64	-6.5956	3	2	sp|Q96I34|PP16A_HUMAN	STYX	Q4	0.9979	0.9978	1	1	DNPEVVRPHNGRVGGSPVRHLYSKRLDRSVS
sp|Q96QD8|S38A2_HUMAN_469	K.KEPMKSphosVQK.L	K.KEPMKSphosVQK.L	-6.64	-6.6178	2	2	sp|Q96QD8|S38A2_HUMAN	STYX	Q4	0.9798	0.9766	1	1	PSAFYIKLVKKEPMKSVQKIGALFFLLSGVL
sp|Q9BVI0|PHF20_HUMAN_157	K.SLSphosSSPDK.R	K.SLSphosSSPDK.R	-6.64	-6.64	2	1	sp|Q9BVI0|PHF20_HUMAN	STYX	Q4	0.9899	0.9333	0.994	0.987	IVGNARPKETDHKSLSSSPDKREKFKEQRKA
sp|Q9BVM2|DPCD_HUMAN_12 16	R.TphosAQKTphosALLQDGR.R	R.TphosAQKTphosALLQDGR.R	-6.64	-6.18655	3	2	sp|Q9BVM2|DPCD_HUMAN	STYX	Q4	0.9824	0.9655	1	1	____MAVTGWLESLRTAQKTALLQDGRRKVH MAVTGWLESLRTAQKTALLQDGRRKVHYLFP
sp|Q9BZC7|ABCA2_HUMAN_616	R.KDGSphosLPPHVHYK.L	R.KDGSphosLPPHVHYK.L	-6.64	-6.5956	4	17	sp|Q9BZC7|ABCA2_HUMAN	STYX	Q4	0.9984	0.9995	0.99	0.997	VTVFASVIFQTRKDGSLPPHVHYKIRQNSSF
sp|Q9UGL1|KDM5B_HUMAN_1456 1457_C	R.ER(SY)phosELVR.S	R.ER(SY)phosELVR.S	-6.64	-3.34968	1	2	sp|Q9UGL1|KDM5B_HUMAN	STYX	Q4	0.909	0.9919	1	1	SHPKDMNNFKLERERSYELVRSAETHSLPSD HPKDMNNFKLERERSYELVRSAETHSLPSDT
sp|Q9UPN3|MACF1_HUMAN_1911	K.AIESphosGILDRDLANNLK.S	K.AIESphosGILDRDLANNLK.S	-6.64	-4.41118	2	1	sp|Q9UPN3|MACF1_HUMAN	STYX	Q4	0.9521	0.9754	1	1	LPATTEILSWKKAIESGILDRDLANNLKSIC
tr|A0A1B0GV45|A0A1B0GV45_HUMAN_196 198 200	R.TphosLSphosPSphosLSR.A	R.TphosLSphosPSphosLSR.A	-6.64	-5.87188	1	2	tr|A0A1B0GV45|A0A1B0GV45_HUMAN	STYX	Q4	0.9807	0.9693	0.917	0.753	PGSRRSTSRLDSLSRTLSPSLSRASGLGRES SRRSTSRLDSLSRTLSPSLSRASGLGRESPD RSTSRLDSLSRTLSPSLSRASGLGRESPDSR
tr|A0A1W2PQX5|A0A1W2PQX5_HUMAN_1447	R.LPTAQCRSphosREVK.E	R.LPTAQCRSphosREVK.E	-6.64	-5.23311	1	2	tr|A0A1W2PQX5|A0A1W2PQX5_HUMAN	STYX	Q4	0.9167	0.9729	0.573	0.71	PAEEAEGRLPTAQCRSREVKEPPPGDPQTKP
tr|H7C016|H7C016_HUMAN_164 165 167	R.KDTphosTphosPTphosDAPK.G	R.KDTphosTphosPTphosDAPK.G	-6.64	-6.5956	1	1	tr|H7C016|H7C016_HUMAN	STYX	Q4	0.9471	0.9395	1	1	GHWSRSPVTSVARKDTTPTDAPKGTWPFSVD HWSRSPVTSVARKDTTPTDAPKGTWPFSVDS SRSPVTSVARKDTTPTDAPKGTWPFSVDSDS
tr|M0R3B3|M0R3B3_HUMAN_59	K.QIAVGSERVTphosCSPR.C	K.QIAVGSERVTphosCSPR.C	-6.64	-5.73311	2	7	tr|M0R3B3|M0R3B3_HUMAN	STYX	Q4	0.9898	0.9969	0.797	0.858	KKTTQKQIAVGSERVTCSPRCWKGMAQLHLT
sp|O15173|PGRC2_HUMAN_90	R.GLGAGAGAGEESphosPATSLPR.M	R.GLGAGAGAGEESphosPATSLPR.M	-6.64	0.108389	1	2	sp|O15173|PGRC2_HUMAN	STYX	NR	1	1	0.991	0.993	WGRRGLGAGAGAGEESPATSLPRMKKRDFSL
sp|O60216|RAD21_HUMAN_394	R.CLTphosPLVPEDLR.K	R.CLTphosPLVPEDLRK.R	-6.64	-0.118398	1	1	sp|O60216|RAD21_HUMAN	STYX	NR	0.9988	1	1	1	PLWNNRLLKLFTRCLTPLVPEDLRKRRKGGE
sp|O60907|TBL1X_HUMAN_43 44 45_C	R.EGGSHFIN(TSS)phosPR.G	R.EGGSHFIN(TSS)phosPR.G	-6.64	0.0341041	1	4	sp|O60907|TBL1X_HUMAN	STYX	NR	0.9987	1	1	0.999	FQRLRGREGGSHFINTSSPRGEAKMSITSDE QRLRGREGGSHFINTSSPRGEAKMSITSDEV RLRGREGGSHFINTSSPRGEAKMSITSDEVN
sp|P06748|NPM_HUMAN_78	K.DELHIVEAEAMNYEGSPIKVTLATphosLK.M	K.DELHIVEAEAMNYEGSPIKVTLATphosLK.M	-6.64	-0.340791	1	1	sp|P06748|NPM_HUMAN	STYX	NR	0.9615	0.9811	0.698	0.721	EAMNYEGSPIKVTLATLKMSVQPTVSLGGFE
sp|P26358|DNMT1_HUMAN_953 954_C	K.L(SS)phosPVKRPR.K	K.L(SS)phosPVKRPR.K	-6.64	-0.323717	1	3	sp|P26358|DNMT1_HUMAN	STYX	NR	0.9623	0.9952	1	1	GVYLPPEAFTFNIKLSSPVKRPRKEPVDEDL VYLPPEAFTFNIKLSSPVKRPRKEPVDEDLY
sp|P49815|TSC2_HUMAN_1420	R.SQSphosGTLDGESAAWSASGEDSR.G	R.SQSphosGTLDGESAAWSASGEDSR.G	-6.64	0.16171	1	8	sp|P49815|TSC2_HUMAN	STYX	NR	0.9999	1	0.495	0.992	ADVGRLSPEVKARSQSGTLDGESAAWSASGE
sp|P52948|NUP98_HUMAN_1344	K.RISphosEACSLAQQSGDHR.L	K.RISphosEACSLAQQSGDHR.L	-6.64	-1.41118	1	1	sp|P52948|NUP98_HUMAN	STYX	NR	0.9984	1	0.993	0.998	SPVEAVFSYLTGKRISEACSLAQQSGDHRLA
sp|P55809|SCOT1_HUMAN_170	R.AGGAGVPAFYTPTGYGTLVQEGGSphosPIKYNK.D	R.AGGAGVPAFYTPTGYGTLVQEGGSphosPIKY.N	-6.64	-0.523655	1	6	sp|P55809|SCOT1_HUMAN	STYX	NR	0.9933	0.9959	0.566	0.994	FYTPTGYGTLVQEGGSPIKYNKDGSVAIASK
sp|P63208|SKP1_HUMAN_131	K.GKTphosPEEIR.K	K.GKTphosPEEIRK.T	-6.64	0.0997818	6	11	sp|P63208|SKP1_HUMAN	STYX	NR	0.9987	0.9995	1	1	LDVTCKTVANMIKGKTPEEIRKTFNIKNDFT
sp|P78347|GTF2I_HUMAN_412 413 414_C	R.RP(STY)phosGIPR.L	R.RP(STY)phosGIPR.L	-6.64	0.203518	3	6	sp|P78347|GTF2I_HUMAN	STYX	NR	0.9999	1	1	1.001	LYVEGLPEGIPFRRPSTYGIPRLERILLAKE YVEGLPEGIPFRRPSTYGIPRLERILLAKER VEGLPEGIPFRRPSTYGIPRLERILLAKERI
sp|Q00536|CDK16_HUMAN_119	K.RLSphosLPADIR.L	K.RLSphosLPADIR.L	-6.64	0.0910706	2	12	sp|Q00536|CDK16_HUMAN	STYX	NR	0.9996	1	1	1	HPPRKISTEDINKRLSLPADIRLPEGYLEKL
sp|Q07912|ACK1_HUMAN_517 518_C	K.KP(TY)phosDPVSEDQDPLSSDFKR.L	K.KP(TY)phosDPVSEDQDPLSSDFKR.L	-6.64	-0.0326684	1	5	sp|Q07912|ACK1_HUMAN	STYX	NR	1	1	1	1	STSRPPQHLGGVKKPTYDPVSEDQDPLSSDF TSRPPQHLGGVKKPTYDPVSEDQDPLSSDFK
sp|Q12955|ANK3_HUMAN_4332 4333_C	R.(TS)phosPADGKPR.L	R.(TS)phosPADGKPR.L	-6.64	-1.04722	1	2	sp|Q12955|ANK3_HUMAN	STYX	NR	0.9509	0.9944	1	1	ETKPCVPVSMKKMSRTSPADGKPRLSLHEEE TKPCVPVSMKKMSRTSPADGKPRLSLHEEEG
sp|Q14195|DPYL3_HUMAN_507 508 509_C	R.GMYDGPVFDL(TTT)phosPK.G	R.GMYDGPVFDL(TTT)phosPK.G	-6.64	0.137257	1	2	sp|Q14195|DPYL3_HUMAN	STYX	NR	1	1	1	0.999	HAVPRGMYDGPVFDLTTTPKGGTPAGSARGS AVPRGMYDGPVFDLTTTPKGGTPAGSARGSP VPRGMYDGPVFDLTTTPKGGTPAGSARGSPT
sp|Q14667|K0100_HUMAN_1508 1509_C	K.RGVP(TS)phosASAPPR.V	K.RGVP(TS)phosASAPPR.V	-6.64	-0.271259	1	2	sp|Q14667|K0100_HUMAN	STYX	NR	0.9803	0.995	0.666	0.666	IDPQMPAKKPKRGVPTSASAPPRVNTPSFSG DPQMPAKKPKRGVPTSASAPPRVNTPSFSGQ
sp|Q14669|TRIPC_HUMAN_340	R.RGSphosGLGK.R	R.RGSphosGLGKR.G	-6.64	0.00835882	3	3	sp|Q14669|TRIPC_HUMAN	STYX	NR	0.9863	0.9856	1	1	RQKTTGSCASTSRRGSGLGKRGAAEARRQEK
sp|Q14999|CUL7_HUMAN_1128 1129_C	K.GRNRSHDW(SS)phosLATR.G	R.SHDW(SS)phosLATR.G	-6.64	0.406443	1	3	sp|Q14999|CUL7_HUMAN	STYX	NR	0.9392	0.9984	0.974	0.998	VATPRPKGRNRSHDWSSLATRGLPSSIMRNL ATPRPKGRNRSHDWSSLATRGLPSSIMRNLT
sp|Q15942|ZYX_HUMAN_308	K.LGHPEALSAGTGSphosPQPPSFTYAQQR.E	K.LGHPEALSAGTGSphosPQPPSFTYAQQR.E	-6.64	-0.438517	1	8	sp|Q15942|ZYX_HUMAN	STYX	NR	0.9999	1	0.994	0.994	NQKLGHPEALSAGTGSPQPPSFTYAQQREKP
sp|Q5T1M5|FKB15_HUMAN_356	K.SNSLSEQLAINTSphosPDAVK.A	K.SNSLSEQLAINTSphosPDAVK.A	-6.64	-0.733108	1	6	sp|Q5T1M5|FKB15_HUMAN	STYX	NR	0.9999	1	0.909	0.96	RTKSNSLSEQLAINTSPDAVKAKLISRMAKM
sp|Q6WCQ1|MPRIP_HUMAN_889	R.TLLTGDGGGEATphosGSPLAQGK.D	R.TLLTGDGGGEATphosGSPLAQGK.D	-6.64	-0.875127	1	1	sp|Q6WCQ1|MPRIP_HUMAN	STYX	NR	0.9987	0.9999	0.522	0.499	TRLRTLLTGDGGGEATGSPLAQGKDAYELEV
sp|Q765P7|MTSS2_HUMAN_456	R.GLSphosLEHQK.S	R.GLSphosLEHQK.S	-6.64	0.173782	1	1	sp|Q765P7|MTSS2_HUMAN	STYX	NR	0.9832	0.9979	1	1	SPAASDLAMVLTRGLSLEHQKSSRDSLQYSS
sp|Q7Z2Z1|TICRR_HUMAN_1301 1302 1303 1307_C	K.RPGNSTV(TSS)phosPPVTphosPK.K	K.RPGNSTV(TSS)phosPPVTphosPK.K	-6.64	-1.41118	1	1	sp|Q7Z2Z1|TICRR_HUMAN	STYX	NR	0.9198	0.9985	1.329	1.31	DKAIKTPKRPGNSTVTSSPPVTPKKLFTSPL KAIKTPKRPGNSTVTSSPPVTPKKLFTSPLC AIKTPKRPGNSTVTSSPPVTPKKLFTSPLCD PKRPGNSTVTSSPPVTPKKLFTSPLCDVSKK
sp|Q8NFA0|UBP32_HUMAN_1350	K.KVDAQSSphosAGEEDVLLSK.S	K.KVDAQSSphosAGEEDVLLSK.S	-6.64	-1.56318	1	1	sp|Q8NFA0|UBP32_HUMAN	STYX	NR	0.971	1	0.959	0.982	PRILAREVKKVDAQSSAGEEDVLLSKSPSSL
sp|Q99733|NP1L4_HUMAN_121	R.EFITGDVEPTDAESphosEWHSENEEEEKLAGDMK.S	R.EFITGDVEPTDAESphosEWHSENEEEEK.L	-6.64	0.347379	5	2	sp|Q99733|NP1L4_HUMAN	STYX	NR	1	1	0.546	0.431	RREFITGDVEPTDAESEWHSENEEEEKLAGD
sp|Q9BRD0|BUD13_HUMAN_18	R.YLSphosGADAGVDR.G	R.YLSphosGADAGVDRGSESGR.K	-6.64	-0.0188626	1	1	sp|Q9BRD0|BUD13_HUMAN	STYX	NR	0.9987	0.9998	0.984	0.429	AAPPLSKAEYLKRYLSGADAGVDRGSESGRK
sp|Q9H9D4|ZN408_HUMAN_322	R.AKTphosPEPGAQQSGFPTLSR.S	R.AKTphosPEPGAQQSGFPTLSR.S	-6.64	0.451691	1	10	sp|Q9H9D4|ZN408_HUMAN	STYX	NR	0.9997	1	0.998	0.999	KKLHSPSDQCPPRAKTPEPGAQQSGFPTLSR
sp|Q9NXV6|CARF_HUMAN_346	K.NSSSSGTSLLTphosPK.S	K.NSSSSGTSLLTphosPK.S	-6.64	0.543016	1	1	sp|Q9NXV6|CARF_HUMAN	STYX	NR	0.9102	0.9999	0.925	0.995	SSVAKNSSSSGTSLLTPKSSSSTNTSLLTSK
sp|Q9NY27|PP4R2_HUMAN_161 162 163_C	R.MNGVMFPGNSP(SYT)phosER.S	R.MNGVMFPGNSP(SYT)phosER.S	-6.64	0.0613077	1	1	sp|Q9NY27|PP4R2_HUMAN	STYX	NR	0.9934	0.9999	0.537	0.502	SLNRMNGVMFPGNSPSYTERSNINGPGTPRP LNRMNGVMFPGNSPSYTERSNINGPGTPRPL NRMNGVMFPGNSPSYTERSNINGPGTPRPLN
sp|Q9P2E9|RRBP1_HUMAN_604	K.KTESASphosVQGR.N	K.TESASphosVQGR.N	-6.64	-0.636962	1	2	sp|Q9P2E9|RRBP1_HUMAN	STYX	NR	0.9971	0.9998	0.94	0.994	KADAAANQGKKTESASVQGRNTDVAQSPEAP
sp|Q9BUJ2|HNRL1_HUMAN_209	R.RGRSPQPPAEEDEDDFDDTphosLVAIDTYNCDLHFK.V	R.RGRSPQPPAEEDEDDFDDTphosLVAIDTYNCDLHFK.V	-6.37013	-6.5956	2	4	sp|Q9BUJ2|HNRL1_HUMAN	STYX	Q4	0.9971	0.9963	0.822	0.985	SPQPPAEEDEDDFDDTLVAIDTYNCDLHFKV
sp|P07359|GP1BA_HUMAN_629	R.RPSphosALSQGR.G	R.RPSphosALSQGR.G	-6.10026	3.66777	1	1	sp|P07359|GP1BA_HUMAN	STYX	Q1	0.9478	0.9957	0.929	0.989	RPNGRVGPLVAGRRPSALSQGRGQDLLSTVS
sp|Q09666|AHNK_HUMAN_1170	K.VDIEAPDVSphosLEGPEGK.L	K.VDIEAPDVSphosLEGPEGK.L	-6.10026	3.257	1	1	sp|Q09666|AHNK_HUMAN	STYX	Q1	0.9948	1	1	1	VVVSGPKVDIEAPDVSLEGPEGKLKGPKFKM
sp|Q14683|SMC1A_HUMAN_360	R.MEEESQSphosQGRDLTLEENQVK.K	R.MEEESQSphosQGR.D	-6.10026	5.3003	4	10	sp|Q14683|SMC1A_HUMAN	STYQ	Q1	1	1	0.981	0.979	KARQEFEERMEEESQSQGRDLTLEENQVKKY
sp|H7C350|CC188_HUMAN_344	K.GLAGQLWLLTphosLR.L	K.GLAGQLWLLTphosLR.L	-6.10026	-6.5956	1	11	sp|H7C350|CC188_HUMAN	STYX	Q4	0.9661	0.9935	1	1	KLGSSKGLAGQLWLLTLRLLLGALLVWTAAY
sp|O75122|CLAP2_HUMAN_1012 1013_C	K.ASLLHSMPTH(SS)phosPR.S	K.ASLLHSMPTH(SS)phosPR.S	-6.10026	-1.30684	1	9	sp|O75122|CLAP2_HUMAN	STYX	NR	0.9996	1	0.998	0.996	ALDNKASLLHSMPTHSSPRSRDYNPYNYSDS LDNKASLLHSMPTHSSPRSRDYNPYNYSDSI
sp|Q9P2E9|RRBP1_HUMAN_602	K.KTESphosASVQGR.N	K.KTESphosASVQGR.N	-6.10026	-1.14627	1	2	sp|Q9P2E9|RRBP1_HUMAN	STYX	NR	0.9953	0.9996	0.498	0.498	GKKADAAANQGKKTESASVQGRNTDVAQSPE
sp|Q6ZUT9|DEN5B_HUMAN_833	R.RKSphosDSGVMLPTLR.V	K.SphosDSGVMLPTLR.V	-5.87013	0.272505	2	8	sp|Q6ZUT9|DEN5B_HUMAN	STYX	NR	0.9999	1	0.978	0.997	HLAESPVALGPERRKSDSGVMLPTLRVSLIQ
sp|Q5THK1|PR14L_HUMAN_157	K.TSPSphosQEDLLMQSSK.E	K.TSPSphosQEDLLMQSSK.E	-5.5153	4.77617	1	2	sp|Q5THK1|PR14L_HUMAN	STYQ	Q1	0.9997	0.9998	0.996	0.992	DPHQHSTAAEEKTSPSQEDLLMQSSKELSHV
sp|Q13393|PLD1_HUMAN_906 911	K.LLIADDNTphosVIIGSphosANINDR.S	K.LLIADDNTphosVIIGSphosANINDR.S	-5.5153	-6.5956	1	1	sp|Q13393|PLD1_HUMAN	STYX	Q4	0.9436	0.9472	1	1	ELIYVHSKLLIADDNTVIIGSANINDRSMLG HSKLLIADDNTVIIGSANINDRSMLGKRDSE
sp|P28290|ITPI2_HUMAN_1174 1175_C	R.TGSVQTPPDLE(SS)phosEEVDAAEGAPEVVGPK.S	R.TGSVQTPPDLE(SS)phosEEVDAAEGAPEVVGPK.S	-5.5153	-0.210314	5	14	sp|P28290|ITPI2_HUMAN	STYX	NR	0.9968	0.9986	0.996	1	APSRTGSVQTPPDLESSEEVDAAEGAPEVVG PSRTGSVQTPPDLESSEEVDAAEGAPEVVGP
sp|P62820|RAB1A_HUMAN_75	R.FRTphosITSSYYR.G	R.FRTphosITSSYYR.G	-5.5153	-0.241255	1	3	sp|P62820|RAB1A_HUMAN	STYX	NR	0.9949	0.9998	0.998	0.996	IKLQIWDTAGQERFRTITSSYYRGAHGIIVV
sp|Q08050|FOXM1_HUMAN_191	R.KMSphosSDGLGSR.S	R.KMSphosSDGLGSR.S	-5.5153	0.0870708	1	3	sp|Q08050|FOXM1_HUMAN	STYX	NR	0.9971	0.999	0.968	0.976	TINNSLSNIQWLRKMSSDGLGSRSIKQEMEE
sp|Q9P1Z3|HCN3_HUMAN_751 764	R.TphosAQPPRPPVPEPATphosPR.G	R.TphosAQPPRPPVPEPATphosPR.G	-5.5153	-0.447706	3	7	sp|Q9P1Z3|HCN3_HUMAN	STYX	NR	0.9825	0.9954	1	1	SERLPPSGLLAKPPRTAQPPRPPVPEPATPR PRTAQPPRPPVPEPATPRGLQLSANM_____
tr|H0YGV4|H0YGV4_HUMAN_84	S.VSNVPSphosISR.L	S.VSNVPSphosISR.L	-5.30778	-5.14815	2	3	tr|H0YGV4|H0YGV4_HUMAN	STYX	Q4	0.9213	0.9496	0.981	0.981	KDLENSRKKSVSNVPSISRLPTPSPCHTPAS
sp|O00425|IF2B3_HUMAN_184	R.QGSphosPGSVSK.Q	R.QGSphosPGSVSK.Q	-5.30778	0.0217175	2	4	sp|O00425|IF2B3_HUMAN	STYX	NR	0.9749	0.9988	0.997	0.997	RGRRGLGQRGSSRQGSPGSVSKQKPCDLPLR
sp|P49959|MRE11_HUMAN_676	K.IMSphosQSQVSK.G	K.IMSphosQSQVSK.G	-5.10026	2.14034	1	1	sp|P49959|MRE11_HUMAN	STYQ	Q1	0.9972	0.98	0.988	0.979	KTDQRWSSTSSSKIMSQSQVSKGVDFESSED
sp|Q8TAD8|SNIP1_HUMAN_202	R.NDVGGGGSESphosQELVPRPGGNNK.E	R.NDVGGGGSESphosQELVPR.P	-5.10026	3.02629	1	2	sp|Q8TAD8|SNIP1_HUMAN	STYQ	Q1	1	1	0.746	0.889	REHRQRNDVGGGGSESQELVPRPGGNNKEKE
sp|O75074|LRP3_HUMAN_680	R.APEVGPSphosGPPLPSGLR.D	R.APEVGPSphosGPPLPSGLR.D	-5.10026	-5.14815	1	1	sp|O75074|LRP3_HUMAN	STYX	Q4	0.9816	0.9417	0.997	0.991	DRPPSAPGRAPEVGPSGPPLPSGLRDPECRP
sp|O95450|ATS2_HUMAN_720	D.KCGVCGGDNSphosHCK.V	D.KCGVCGGDNSphosHCK.V	-5.10026	-2.64565	1	1	sp|O95450|ATS2_HUMAN	STYX	Q4	0.9129	0.9325	1	1	SSKQEDKCGVCGGDNSHCKVVKGTFTRSPKK
sp|Q6P1L5|F117B_HUMAN_16	R.NGSPTPAGSphosLGGGAVATAGGPGSR.L	R.NGSPTPAGSphosLGGGAVATAGGPGSR.L	-5.10026	-1.92575	1	7	sp|Q6P1L5|F117B_HUMAN	STYX	Q4	0.9999	1	0.533	0.991	MSQRVRRNGSPTPAGSLGGGAVATAGGPGSR
sp|B2RTY4|MYO9A_HUMAN_1829	K.ENKEPSphosPK.A	K.ENKEPSphosPK.A	-5.10026	-0.951748	1	1	sp|B2RTY4|MYO9A_HUMAN	STYX	NR	0.948	0.9832	1	1	LPGSCRKEFKENKEPSPKAKRKRSVKISNVA
sp|Q9UPT9|UBP22_HUMAN_237	R.SphosPHIPYK.L	R.SphosPHIPYK.L	-5.10026	-0.0969391	2	2	sp|Q9UPT9|UBP22_HUMAN	STYX	NR	0.9996	0.9996	0.989	0.998	CEMSSLFQEFYSGHRSPHIPYKLLHLVWTHA
sp|Q9UGP4|LIMD1_HUMAN_316	R.SNSphosGLGGEVSGVMSKPNVDPQPWFQDGPK.S	R.SNSphosGLGGEVSGVMSK.P	-5.01991	0.197629	2	3	sp|Q9UGP4|LIMD1_HUMAN	STYX	NR	0.935	1	0.948	0.994	LALSCPRQGGLPRSNSGLGGEVSGVMSKPNV
sp|Q9Y3Z3|SAMH1_HUMAN_92 93_C	R.FENLGV(SS)phosLGER.K	R.FENLGV(SS)phosLGER.K	-4.93929	0.243444	2	2	sp|Q9Y3Z3|SAMH1_HUMAN	STYX	NR	0.996	0.9997	1	1	LLPCLDESRFENLGVSSLGERKKLLSYIQRL LPCLDESRFENLGVSSLGERKKLLSYIQRLV
sp|O96017|CHK2_HUMAN_378 379_C	K.ILGE(TS)phosLMR.T	K.ILGE(TS)phosLMR.T	-4.91668	4.72939	2	1	sp|O96017|CHK2_HUMAN	STYX	Q1	0.9973	0.9879	1	1	LIKITDFGHSKILGETSLMRTLCGTPTYLAP IKITDFGHSKILGETSLMRTLCGTPTYLAPE
tr|A0A494C1M5|A0A494C1M5_HUMAN_248	R.GAPGSPTphosQERPAGGLGEAPNGAPSVCAEEGSLGPR.N	R.GAPGSPTphosQERPAGGLGEAPNGAPSVCAEEGSLGPR.N	-4.80778	1.46165	2	3	tr|A0A494C1M5|A0A494C1M5_HUMAN	STYQ	Q1	0.9957	1	0.834	0.93	EQEAFLGVRGAPGSPTQERPAGGLGEAPNGA
sp|Q13315|ATM_HUMAN_1891	R.STTPANLDSphosESEHFFR.C	R.STTPANLDSphosESEHFFR.C	-4.77833	3.25416	1	1	sp|Q13315|ATM_HUMAN	STYX	Q1	0.9791	1	0.952	0.947	HFSQTSRSTTPANLDSESEHFFRCCLDKKSQ
sp|Q9BY65|NPCR1_HUMAN_93 94_C	K.GVSPLN(SS)phosIDYGR.L	K.GVSPLN(SS)phosIDYGR.L	-4.77833	-6.5956	1	1	sp|Q9BY65|NPCR1_HUMAN	STYX	Q4	0.9958	0.9967	0.666	0.666	LVMKGILQKGVSPLNSSIDYGRLAKKESL__ VMKGILQKGVSPLNSSIDYGRLAKKESL___
sp|P18206|VINC_HUMAN_602 603 604_C	Q.EVSDVFSD(TTT)phosPIK.L	Q.EVSDVFSD(TTT)phosPIK.L	-4.77833	0.48606	1	3	sp|P18206|VINC_HUMAN	STYX	NR	0.9912	0.9982	0.998	0.999	MQEAMTQEVSDVFSDTTTPIKLLAVAATAPP QEAMTQEVSDVFSDTTTPIKLLAVAATAPPD EAMTQEVSDVFSDTTTPIKLLAVAATAPPDA
sp|Q96GY3|LIN37_HUMAN_182	R.SRIPSphosPLQPEMQGTPDDEPSEPEPSPSTLIYR.N	R.SRIPSphosPLQPEMQGTPDDEPSEPEPSPSTLIYR.N	-4.77833	-0.209546	3	20	sp|Q96GY3|LIN37_HUMAN	STYX	NR	1	1	0.996	0.998	TPPGPPGDACRSRIPSPLQPEMQGTPDDEPS
sp|P10155|RO60_HUMAN_19	K.QIANSphosQDGYVWQVTDMNR.L	K.QIANSphosQDGYVWQVTDMNR.L	-4.69658	3.20647	8	15	sp|P10155|RO60_HUMAN	STYQ	Q1	1	1	0.997	0.996	SVNQMQPLNEKQIANSQDGYVWQVTDMNRLH
sp|A0JNW5|UH1BL_HUMAN_891	K.SPVSESVSphosPVVPDYLPTENGDFLSSK.R	K.SPVSESVSphosPVVPDYLPTENGDFLSSK.R	-4.67397	-0.826218	2	4	sp|A0JNW5|UH1BL_HUMAN	STYX	NR	0.9933	0.9948	0.992	0.995	VDQANTLKSPVSESVSPVVPDYLPTENGDFL
sp|Q14683|SMC1A_HUMAN_358	R.MEEESphosQSQGR.D	R.MEEESphosQSQGR.D	-4.53562	4.48182	2	7	sp|Q14683|SMC1A_HUMAN	STYQ	Q1	0.9921	1	0.987	0.985	VEKARQEFEERMEEESQSQGRDLTLEENQVK
sp|P52597|HNRPF_HUMAN_186 187_C	R.YIEVFK(SS)phosQEEVR.S	R.YIEVFK(SS)phosQEEVR.S	-4.5153	1.75473	3	3	sp|P52597|HNRPF_HUMAN	STYQ	Q1	0.9986	0.996	1	1	KHKERIGHRYIEVFKSSQEEVRSYSDPPLKF HKERIGHRYIEVFKSSQEEVRSYSDPPLKFM
sp|P16070|CD44_HUMAN_704	R.KPSGLNGEASphosKSQEMVHLVNK.E	R.KPSGLNGEASphosKSQEMVHLVNK.E	-4.5153	0.0676612	9	8	sp|P16070|CD44_HUMAN	STYX	NR	1	0.9887	0.915	0.775	GAVEDRKPSGLNGEASKSQEMVHLVNKESSE
sp|Q5JPI9|EFMT2_HUMAN_21	R.SDKGSphosPGEDGFVPSALGTR.E	R.SDKGSphosPGEDGFVPSALGTR.E	-4.5153	-0.440862	1	4	sp|Q5JPI9|EFMT2_HUMAN	STYX	NR	0.9993	1	0.995	0.996	DGGGGAAVAARSDKGSPGEDGFVPSALGTRE
sp|Q8N3V7|SYNPO_HUMAN_754	R.CPSphosPTMSLPSSWK.Y	R.CPSphosPTMSLPSSWK.Y	-4.5153	0.670167	3	2	sp|Q8N3V7|SYNPO_HUMAN	STYX	NR	0.9997	1	0.996	0.998	VIESSSHTPELARCPSPTMSLPSSWKYPTNA
sp|Q9UKA4|AKA11_HUMAN_20	R.KSFSphosEDVFQSVK.S	R.KSFSphosEDVFQSVK.S	-4.5153	-0.332254	1	2	sp|Q9UKA4|AKA11_HUMAN	STYX	NR	0.9999	1	0.892	0.986	RNNHMKTKASVRKSFSEDVFQSVKSLLQSQK
sp|Q9BVJ6|UT14A_HUMAN_445	R.SELSQDAEPAGSphosQETK.D	R.SELSQDAEPAGSphosQETK.D	-4.4041	4.21599	4	7	sp|Q9BVJ6|UT14A_HUMAN	STYQ	Q1	1	1	0.995	0.993	LRKRSELSQDAEPAGSQETKDSGSQEVLSEL
sp|Q05086|UBE3A_HUMAN_217 218_C	R.IGD(SS)phosQGDNNLQK.L	R.IGD(SS)phosQGDNNLQK.L	-4.2929	3.97425	1	3	sp|Q05086|UBE3A_HUMAN	STYQ	Q1	0.9983	0.9998	1	1	AMEEDSEASSSRIGDSSQGDNNLQKLGPDDV MEEDSEASSSRIGDSSQGDNNLQKLGPDDVS
sp|Q96RU2|UBP28_HUMAN_493 494 495_C	K.ESTSTE(SSS)phosQDVESTFSSPEDSLPK.S	K.ESTSTE(SSS)phosQDVESTFSSPEDSLPK.S	-4.2929	6.55075	1	1	sp|Q96RU2|UBP28_HUMAN	STYQ	Q1	0.9723	0.9984	0.99	0.998	CSVSDQTSKESTSTESSSQDVESTFSSPEDS SVSDQTSKESTSTESSSQDVESTFSSPEDSL VSDQTSKESTSTESSSQDVESTFSSPEDSLP
sp|P15531|NDKA_HUMAN_122	R.NIIHGSDSphosVESAEK.E	R.NIIHGSDSphosVESAEK.E	-4.2929	0.300315	1	5	sp|P15531|NDKA_HUMAN	STYX	NR	0.9998	1	0.932	0.981	DFCIQVGRNIIHGSDSVESAEKEIGLWFHPE
sp|Q9UPQ9|TNR6B_HUMAN_803	K.GGWEDCKRSphosPAWNETGR.Q	R.SphosPAWNETGR.Q	-4.2929	-0.603825	1	1	sp|Q9UPQ9|TNR6B_HUMAN	STYX	NR	0.9998	0.999	0.998	0.99	NASLASKGGWEDCKRSPAWNETGRQPNSWNK
sp|Q12955|ANK3_HUMAN_4298	K.IHGSGHVEEPASphosPLAAYQK.S	K.IHGSGHVEEPASphosPLAAYQK.S	-4.25004	-1.03001	2	2	sp|Q12955|ANK3_HUMAN	STYX	NR	0.9999	1	0.998	0.994	LKPKIHGSGHVEEPASPLAAYQKSLEETSKL
sp|P40425|PBX2_HUMAN_104 105_C	R.(SS)phosQEEEPVDPQLMR.L	K.TGLSIR(SS)phosQEEEPVDPQLMR.L	-4.19658	4.39907	2	8	sp|P40425|PBX2_HUMAN	STYQ	Q1	0.9998	1	1	1	SVLCEIKEKTGLSIRSSQEEEPVDPQLMRLD VLCEIKEKTGLSIRSSQEEEPVDPQLMRLDN
sp|Q86W50|MET16_HUMAN_419	K.ESGNSphosQELAR.G	K.ESGNSphosQELAR.G	-4.19658	4.57352	2	7	sp|Q86W50|MET16_HUMAN	STYQ	Q1	0.9976	0.9999	0.994	0.994	QALEEKKPTPKESGNSQELARGPQERTPCGP
sp|Q7Z5J4|RAI1_HUMAN_1110	K.AASSPSphosNPAALPVASDSSPMGSK.T	K.AASSPSphosNPAALPVASDSSPMGSK.T	-4.10026	0.375416	1	5	sp|Q7Z5J4|RAI1_HUMAN	STYX	NR	1	1	0.967	0.918	GKRVGKPSPKAASSPSNPAALPVASDSSPMG
sp|Q96KQ4|ASPP1_HUMAN_335	R.VNGTSSPQSphosPLSTSGR.V	R.VNGTSSPQSphosPLSTSGR.V	-4.10026	0.739774	1	4	sp|Q96KQ4|ASPP1_HUMAN	STYX	NR	0.9833	0.999	0.995	0.997	KKIQLNRVNGTSSPQSPLSTSGRVAAVGPYI
sp|Q9P2B4|CT2NL_HUMAN_440 441_C	R.LLG(SS)phosASSPGYQSSYQVGINQR.F	R.LLG(SS)phosASSPGYQSSYQVGINQR.F	-4.10026	-0.218119	1	2	sp|Q9P2B4|CT2NL_HUMAN	STYX	NR	0.964	0.9953	0.222	0.824	SSPCSSPVLTKRLLGSSASSPGYQSSYQVGI SPCSSPVLTKRLLGSSASSPGYQSSYQVGIN
sp|Q9Y5B6|PAXB1_HUMAN_65	R.APGGESLLGPGPSPPSphosALTPGLGAEAGGGFPGGAEPGNGLKPR.K	R.APGGESLLGPGPSPPSphosALTPGLGAEAGGGFPGGAEPGNGLKPR.K	-4.10026	-0.0466076	1	7	sp|Q9Y5B6|PAXB1_HUMAN	STYX	NR	0.987	1	0.821	0.882	APGGESLLGPGPSPPSALTPGLGAEAGGGFP
sp|Q13451|FKBP5_HUMAN_445	K.GTDSphosQAMEEEKPEGHV.-	K.GTDSphosQAMEEEKPEGHV.-	-3.96686	4.79724	6	14	sp|Q13451|FKBP5_HUMAN	STYQ	Q1	1	1	0.996	0.993	GKKTSEGVTNEKGTDSQAMEEEKPEGHV___
sp|Q13315|ATM_HUMAN_2996	R.NLSphosDIDQSFNK.V	R.NLSphosDIDQSFNK.V	-3.93033	5.86339	1	2	sp|Q13315|ATM_HUMAN	STYX	Q1	0.9992	0.9999	0.998	0.996	HPTLNADDQECKRNLSDIDQSFNKVAERVLM
sp|Q8TF72|SHRM3_HUMAN_677	R.HSSphosLELGR.G	R.HSSphosLELGR.G	-3.93033	-3.73311	1	1	sp|Q8TF72|SHRM3_HUMAN	STYX	Q4	0.9807	0.9968	0.981	0.977	FSSLQNIPESLRRHSSLELGRGTQEGYPGGR
sp|Q9NZM1|MYOF_HUMAN_1915	R.HTIIPAKSphosPEK.C	R.HTIIPAKSphosPEK.C	-3.93033	-4.14815	1	1	sp|Q9NZM1|MYOF_HUMAN	STYX	Q4	0.9985	0.9999	0.998	0.998	GFLELDLRHTIIPAKSPEKCRLDMIPDLKAM
sp|P24928|RPB1_HUMAN_1892 1906	K.YSPTSphosPTYSPTSPVYTPTSphosPK.Y	K.YSPTSphosPTYSPTSPVYTPTSphosPK.Y	-3.93033	0.734497	1	3	sp|P24928|RPB1_HUMAN	STYX	NR	0.9926	0.9992	0.924	0.966	TSPTYSPTTPKYSPTSPTYSPTSPVYTPTSP TSPTYSPTSPVYTPTSPKYSPTSPTYSPTSP
tr|F8WDU5|F8WDU5_HUMAN_60	R.EGSphosPGDQAAALLTAR.Y	R.EGSphosPGDQAAALLTAR.Y	-3.9041	-2.64565	2	3	tr|F8WDU5|F8WDU5_HUMAN	STYX	Q4	0.9999	1	0.999	0.999	GAPPVPQVPALPREGSPGDQAAALLTARYQS
sp|Q14683|SMC1A_HUMAN_956 957_C	K.GTMDDISQEEG(SS)phosQGEDSVSGSQR.L	K.GTMDDISQEEG(SS)phosQGEDSVSGSQR.L	-3.85433	6.55075	6	1	sp|Q14683|SMC1A_HUMAN	STYQ	Q1	0.9902	0.9035	0.996	0.992	PLSKGTMDDISQEEGSSQGEDSVSGSQRISS LSKGTMDDISQEEGSSQGEDSVSGSQRISSI
sp|Q9H4G0|E41L1_HUMAN_510	K.HQASphosINELKR.T	K.HQASphosINELKR.T	-3.81533	-1.12534	4	6	sp|Q9H4G0|E41L1_HUMAN	STYX	Q4	0.9998	1	1	1	EFLDKPEDVLLKHQASINELKRTLKEPNSKL
sp|P61604|CH10_HUMAN_76	K.VLLPEYphosGGTK.V	K.VLLPEYphosGGTK.V	-3.77833	-1.20955	1	1	sp|P61604|CH10_HUMAN	STYX	Q4	0.9956	0.9992	0.959	0.886	QPVSVKVGDKVLLPEYGGTKVVLDDKDYFLF
sp|Q96P11|NSUN5_HUMAN_167	R.ASSphosLDDLR.A	R.ASSphosLDDLR.A	-3.77833	-3.94063	3	2	sp|Q96P11|NSUN5_HUMAN	STYX	Q4	0.9976	0.9923	0.994	0.987	DYFKRQGFSYQGRASSLDDLRALKGKHFLLD
sp|Q15772|SPEG_HUMAN_540 541_C	R.EPGEPPLFSRP(ST)phosPK.T	R.EPGEPPLFSRP(ST)phosPK.T	-3.77833	-0.290165	1	3	sp|Q15772|SPEG_HUMAN	STYX	NR	0.9848	1	0.919	0.998	PSPREPGEPPLFSRPSTPKTSRAVSPAAAQP SPREPGEPPLFSRPSTPKTSRAVSPAAAQPP
sp|Q9Y2I9|TBC30_HUMAN_708	K.NAVIHIPGHTphosGGKISPVPYEDLK.T	K.NAVIHIPGHTphosGGKISPVPYEDLK.T	-3.77833	-0.178519	1	7	sp|Q9Y2I9|TBC30_HUMAN	STYX	NR	0.9993	1	0.5	0.874	TNRAAKNAVIHIPGHTGGKISPVPYEDLKTK
sp|Q7Z333|SETX_HUMAN_1345	K.LLTSphosQELQMQR.Q	K.LLTSphosQELQMQR.Q	-3.72281	2.02308	4	2	sp|Q7Z333|SETX_HUMAN	STYQ	Q1	0.9997	1	0.979	0.968	SPQNLSVRNNKKLLTSQELQMQRQIRPKSQK
sp|Q12888|TP53B_HUMAN_105	K.VADPVDSSNLDTCGSISphosQVIEQLPQPNR.T	K.VADPVDSSNLDTCGSISphosQVIEQLPQPNR.T	-3.70958	3.57409	2	1	sp|Q12888|TP53B_HUMAN	STYQ	Q1	0.993	0.9824	0.986	0.658	ADPVDSSNLDTCGSISQVIEQLPQPNRTSSV
sp|Q8NEM7|SP20H_HUMAN_296	R.SphosPCNLAIPSEVDVEK.Y	R.SphosPCNLAIPSEVDVEK.Y	-3.70917	-0.479211	2	2	sp|Q8NEM7|SP20H_HUMAN	STYX	NR	1	1	0.971	0.995	LKISKAGNCVDMWKRSPCNLAIPSEVDVEKY
sp|Q12888|TP53B_HUMAN_999	K.LVSPETEASphosEESLQFNLEKPATGER.K	K.LVSPETEASphosEESLQFNLEKPATGER.K	-3.64083	1.20353	1	7	sp|Q12888|TP53B_HUMAN	STYX	Q1	0.998	1	0.982	0.996	KLCLRMKLVSPETEASEESLQFNLEKPATGE
sp|Q14573|ITPR3_HUMAN_2670	R.LGFVDVQNCISphosR.-	R.LGFVDVQNCISphosR.-	-3.64083	0.272505	5	8	sp|Q14573|ITPR3_HUMAN	STYX	NR	1	1	1	1	KRRQRLGFVDVQNCISR______________
sp|Q9UPU5|UBP24_HUMAN_2604	R.HLQQGSESphosPMMIGELR.S	R.HLQQGSESphosPMMIGELR.S	-3.64083	-0.170886	1	10	sp|Q9UPU5|UBP24_HUMAN	STYX	NR	0.9988	1	0.517	0.986	PANENGDRHLQQGSESPMMIGELRSDLDDVD
sp|P55809|SCOT1_HUMAN_509	K.STGCDFAVSphosPK.L	K.STGCDFAVSphosPK.L	-3.55653	-0.227495	2	2	sp|P55809|SCOT1_HUMAN	STYX	NR	1	1	0.998	0.998	TVDDVQKSTGCDFAVSPKLMPMQQIAN____
sp|Q6PH81|CP087_HUMAN_91	R.SNSphosHSDHIR.R	R.SNSphosHSDHIR.R	-3.51991	0.766738	2	1	sp|Q6PH81|CP087_HUMAN	STYX	NR	0.9991	0.9962	0.919	0.917	TVNKDLENRKRSRSNSHSDHIRRGRGRPKSA
sp|O60934|NBN_HUMAN_343	K.TTTPGPSLSphosQGVSVDEK.L	K.TTTPGPSLSphosQGVSVDEK.L	-3.5153	5.28275	3	8	sp|O60934|NBN_HUMAN	STYQ	Q1	0.9972	0.9998	0.925	0.995	HPSTGLKTTTPGPSLSQGVSVDEKLMPSAPV
sp|Q05086|UBE3A_HUMAN_218	R.IGDSSphosQGDNNLQK.L	R.IGDSSphosQGDNNLQK.L	-3.5153	2.00473	1	2	sp|Q05086|UBE3A_HUMAN	STYQ	Q1	0.9994	1	0.954	0.98	MEEDSEASSSRIGDSSQGDNNLQKLGPDDVS
sp|Q9NXE8|CWC25_HUMAN_337	R.KLSphosAEELER.K	R.KLSphosAEELERK.R	-3.5153	1.88156	3	2	sp|Q9NXE8|CWC25_HUMAN	STYX	Q1	0.9997	1	1	1	EVYQRRHAPGYTRKLSAEELERKRQEMMENA
tr|K7EMM4|K7EMM4_HUMAN_97 98 99 100_C	R.AR(TSST)phosDEVLSLEEK.D	R.(TSST)phosDEVLSLEEK.D	-3.5153	0.828063	3	6	tr|K7EMM4|K7EMM4_HUMAN	STYX	NR	0.9996	0.9999	1	1	HSEEEKKELKAPRARTSSTDEVLSLEEKDLR SEEEKKELKAPRARTSSTDEVLSLEEKDLRD EEEKKELKAPRARTSSTDEVLSLEEKDLRDR EEKKELKAPRARTSSTDEVLSLEEKDLRDRE
sp|O60934|NBN_HUMAN_397	R.MLSphosQDAPTVK.E	R.MLSphosQDAPTVK.E	-3.4348	3.22544	2	1	sp|O60934|NBN_HUMAN	STYQ	Q1	0.9987	0.9998	0.996	0.995	KEIKVSKMEQKFRMLSQDAPTVKESCKTSSN
sp|P15822|ZEP1_HUMAN_1180	K.VIGISphosQEESHPSR.D	K.VIGISphosQEESHPSR.D	-3.4041	-0.0466076	6	5	sp|P15822|ZEP1_HUMAN	STYQ	NR	0.9994	0.9999	0.998	0.997	LNRTGKSGSLKVIGISQEESHPSRDGSHPHQ
sp|Q9BVJ6|UT14A_HUMAN_453	K.DSGSphosQEVLSELR.V	K.DSGSphosQEVLSELR.V	-3.39982	3.35303	5	9	sp|Q9BVJ6|UT14A_HUMAN	STYQ	Q1	1	1	0.995	0.995	QDAEPAGSQETKDSGSQEVLSELRVLSQKLK
sp|O00267|SPT5H_HUMAN_804	R.TPHYGSphosQTPLHDGSR.T	R.TPHYGSphosQTPLHDGSR.T	-3.39982	-0.290165	1	1	sp|O00267|SPT5H_HUMAN	STYQ	NR	0.9885	0.9999	0.493	0.348	SQTPLQDGSRTPHYGSQTPLHDGSRTPAQSG
sp|Q8N5C8|TAB3_HUMAN_385	R.SPSphosPISNQPSPR.N	R.SPSphosPISNQPSPR.N	-3.39982	-0.0607522	1	6	sp|Q8N5C8|TAB3_HUMAN	STYX	NR	0.9742	0.9999	0.861	0.995	VEPSQRPGTAINRSPSPISNQPSPRNQHSLY
sp|O95049|ZO3_HUMAN_203	K.RRDSphosEEFGVK.L	R.RDSphosEEFGVK.L	-3.37054	-0.118398	2	7	sp|O95049|ZO3_HUMAN	STYX	NR	0.9987	0.9999	1	1	VQMKPVKSVLVKRRDSEEFGVKLGSQIFIKH
sp|Q9NR48|ASH1L_HUMAN_179	K.KLSphosPVHSEMADYINATPSTLLGSR.D	K.KLSphosPVHSEMADYINATPSTLLGSR.D	-3.37054	0.406443	4	3	sp|Q9NR48|ASH1L_HUMAN	STYX	NR	1	1	0.996	0.998	RLHSQGENNPLSKKLSPVHSEMADYINATPS
sp|Q9UKV3|ACINU_HUMAN_328	K.TRSphosQEQEVLER.G	R.SphosQEQEVLER.G	-3.34636	1.30059	2	4	sp|Q9UKV3|ACINU_HUMAN	STYQ	Q1	1	0.9999	0.911	1	RVKPEEMMDERPKTRSQEQEVLERGGRFTRS
sp|Q13523|PRP4B_HUMAN_294	K.SRSphosPVDLR.G	K.SRSphosPVDLR.G	-3.34249	-0.0466076	2	9	sp|Q13523|PRP4B_HUMAN	STYX	NR	0.9781	0.9982	0.945	0.976	IINESRSRDRGKKSRSPVDLRGKSKDRRSRS
sp|Q8N6T3|ARFG1_HUMAN_246	K.ASELGHSphosLNENVLKPAQEK.V	K.ASELGHSphosLNENVLKPAQEK.V	-3.2929	1.65921	1	1	sp|Q8N6T3|ARFG1_HUMAN	STYX	Q1	1	0.9998	0.997	0.993	KFGSQASQKASELGHSLNENVLKPAQEKVKE
sp|Q92547|TOPB1_HUMAN_1504	K.ELGTGLSphosQKR.K	K.ELGTGLSphosQK.R	-3.2929	3.95076	2	3	sp|Q92547|TOPB1_HUMAN	STYQ	Q1	0.9976	0.9995	0.944	0.982	AISFIQNNKELGTGLSQKRKAPTEKNKIKRP
sp|P61978|HNRPK_HUMAN_420	R.HESGASphosIKIDEPLEGSEDR.L	R.HESGASphosIK.L	-3.2929	0.137257	1	3	sp|P61978|HNRPK_HUMAN	STYX	NR	1	1	0.963	0.983	KGGQRIKQIRHESGASIKIDEPLEGSEDRII
sp|Q96NL6|SCLT1_HUMAN_681	R.KAASphosLMNLENI.-	R.KAASphosLMNLENI.-	-3.2929	0.0997818	1	2	sp|Q96NL6|SCLT1_HUMAN	STYX	NR	0.9992	0.9997	1	1	SQQLSVITVQRRKAASLMNLENI________
sp|O60934|NBN_HUMAN_341	K.TTTPGPSphosLSQGVSVDEK.L	K.TTTPGPSphosLSQGVSVDEK.L	-3.24658	4.22617	2	1	sp|O60934|NBN_HUMAN	STYX	Q1	0.9885	0.9944	0.543	0.497	QGHPSTGLKTTTPGPSLSQGVSVDEKLMPSA
sp|Q5THJ4|VP13D_HUMAN_1598	K.ENGLFSHSSphosLSNTSQK.S	K.ENGLFSHSSphosLSNTSQK.S	-3.21948	0.311286	2	4	sp|Q5THJ4|VP13D_HUMAN	STYX	NR	0.9917	0.9989	0.941	0.99	ESSVERKENGLFSHSSLSNTSQKSLSVKEVK
sp|P62979|RS27A_HUMAN_84 85 86 87_C	K.K(SYTT)phosPKK.N	K.(SYTT)phosPKK.N	-3.20467	-0.875127	2	1	sp|P62979|RS27A_HUMAN	STYX	Q4	0.9927	0.9125	2.001	1	LVLRLRGGAKKRKKKSYTTPKKNKHKRKKVK VLRLRGGAKKRKKKSYTTPKKNKHKRKKVKL LRLRGGAKKRKKKSYTTPKKNKHKRKKVKLA RLRGGAKKRKKKSYTTPKKNKHKRKKVKLAV
sp|Q12888|TP53B_HUMAN_1067 1068_C	R.GNLLHFP(SS)phosQGEEEKEK.L	R.GNLLHFP(SS)phosQGEEEKEKLEGDHTIR.Q	-3.19658	2.83734	6	30	sp|Q12888|TP53B_HUMAN	STYQ	Q1	0.9997	1	1	1	DPPTTPIRGNLLHFPSSQGEEEKEKLEGDHT PPTTPIRGNLLHFPSSQGEEEKEKLEGDHTI
sp|Q9NPI6|DCP1A_HUMAN_522 523 525_C	R.KA(SS)phosPSphosPLTIGTPESQR.K	R.KA(SS)phosPSphosPLTIGTPESQR.K	-3.19577	-0.0188626	2	5	sp|Q9NPI6|DCP1A_HUMAN	STYX	NR	0.9835	0.9976	1.302	1.308	FQQTVTRSSDLERKASSPSPLTIGTPESQRK QQTVTRSSDLERKASSPSPLTIGTPESQRKP TVTRSSDLERKASSPSPLTIGTPESQRKPSI
sp|Q9BWU0|NADAP_HUMAN_528	K.ASSQVLSphosESPSQDSLDAFMSEMK.S	K.ASSQVLSphosESPSQDSLDAFMSEMK.S	-3.19337	1.62444	1	3	sp|Q9BWU0|NADAP_HUMAN	STYX	Q1	0.9768	0.9902	0.494	0.537	LSEISERLKASSQVLSESPSQDSLDAFMSEM
sp|Q9NWW5|CLN6_HUMAN_23	R.QHLGATGGPGAQLGASphosFLQAR.H	R.QHLGATGGPGAQLGASphosFLQAR.H	-3.19337	-0.667019	1	2	sp|Q9NWW5|CLN6_HUMAN	STYX	NR	0.9998	1	0.993	0.995	QHLGATGGPGAQLGASFLQARHGSVSADEAA
sp|Q14195|DPYL3_HUMAN_509	R.GMYDGPVFDLTTTphosPK.G	R.GMYDGPVFDLTTTphosPK.G	-3.18697	0.38833	2	6	sp|Q14195|DPYL3_HUMAN	STYX	NR	1	1	0.962	0.968	VPRGMYDGPVFDLTTTPKGGTPAGSARGSPT
sp|Q9NXX6|NSE4A_HUMAN_377	K.TFEISEPVITPSphosQR.Q	K.TFEISEPVITPSphosQR.Q	-3.14681	2.79042	2	6	sp|Q9NXX6|NSE4A_HUMAN	STYQ	Q1	1	1	0.965	0.997	EIVKTFEISEPVITPSQRQQKPSA_______
sp|Q14676|MDC1_HUMAN_1086	R.QDGSphosQEAPEAPLSSELEPFHPKPK.L	R.QDGSphosQEAPEAPLSSELEPFHPKPK.L	-3.11162	2.41015	4	8	sp|Q14676|MDC1_HUMAN	STYQ	Q1	1	1	0.998	0.998	LPSIKPTVRKTRQDGSQEAPEAPLSSELEPF
sp|P49321|NASP_HUMAN_425	K.LVPSQEETphosKLSVEESEAAGDGVDTK.V	K.LVPSQEETphosKLSVEESEAAGDGVDTK.V	-3.10026	3.66272	1	2	sp|P49321|NASP_HUMAN	STYX	Q1	0.9968	1	0.503	0.592	LEEKVRAKLVPSQEETKLSVEESEAAGDGVD
sp|Q15652|JHD2C_HUMAN_430	K.AGEETLKNSphosQPPWDQIQEDK.K	K.AGEETLKNSphosQPPWDQIQEDK.K	-3.10026	0.548192	1	2	sp|Q15652|JHD2C_HUMAN	STYQ	NR	0.9988	0.9999	0.987	0.996	KPHNNEKAGEETLKNSQPPWDQIQEDKKHEE
sp|Q9UQ35|SRRM2_HUMAN_2367 2368_C	R.TAAALAPASL(TS)phosAR.M	R.TAAALAPASL(TS)phosAR.M	-3.10026	-0.340791	3	1	sp|Q9UQ35|SRRM2_HUMAN	STYX	NR	0.9995	0.9999	0.91	0.956	IAGSRTAAALAPASLTSARMAPALSGANLTS AGSRTAAALAPASLTSARMAPALSGANLTSP
sp|Q96JM7|LMBL3_HUMAN_622 623 624 625_C	R.TDANE(SSSS)phosPEIR.D	R.TDANE(SSSS)phosPEIR.D	-3.05653	0.510561	4	10	sp|Q96JM7|LMBL3_HUMAN	STYX	NR	1	1	1	1	ASPSFPRNKRTDANESSSSPEIRDQHADDVK SPSFPRNKRTDANESSSSPEIRDQHADDVKE PSFPRNKRTDANESSSSPEIRDQHADDVKED SFPRNKRTDANESSSSPEIRDQHADDVKEDF
sp|P78527|PRKDC_HUMAN_2612	R.STVLTPMFVETQASphosQGTLQTR.T	R.STVLTPMFVETQASphosQGTLQTR.T	-3.03562	3.98885	2	5	sp|P78527|PRKDC_HUMAN	STYQ	Q1	0.9999	0.9996	0.96	0.988	FRSTVLTPMFVETQASQGTLQTRTQEGSLSA
sp|Q15459|SF3A1_HUMAN_33	K.QPTEEEASSKEDSphosAPSKPVVGIIYPPPEVR.N	K.QPTEEEASSKEDSphosAPSKPVVGIIYPPPEVR.N	-3.03039	0.0482515	2	3	sp|Q15459|SF3A1_HUMAN	STYX	NR	0.9141	0.9596	0.948	0.932	EPKQPTEEEASSKEDSAPSKPVVGIIYPPPE
sp|P16144|ITB4_HUMAN_1696	R.VDGDSphosPESR.L	R.VDGDSphosPESR.L	-3.0153	-0.00834037	2	4	sp|P16144|ITB4_HUMAN	STYX	NR	0.9996	0.9998	0.995	0.995	AQGGGPATAFRVDGDSPESRLTVPGLSENVP
sp|Q9UQE7|SMC3_HUMAN_1085 1086_C	R.GSGSQ(SS)phosVPSVDQFTGVGIR.V	R.GSGSQ(SS)phosVPSVDQFTGVGIR.V	-3.0128	3.38453	11	13	sp|Q9UQE7|SMC3_HUMAN	STYX	Q1	0.9958	0.995	0.966	0.962	EGEGSGESERGSGSQSSVPSVDQFTGVGIRV GEGSGESERGSGSQSSVPSVDQFTGVGIRVS
sp|Q9ULD5|ZN777_HUMAN_6 7_C	R.(SS)phosPLSFPSVPQEETLR.Q	R.(SS)phosPLSFPSVPQEETLR.Q	-3.0128	-2.15951	7	4	sp|Q9ULD5|ZN777_HUMAN	STYX	Q4	1	1	1	1	__________MENQRSSPLSFPSVPQEETLR _________MENQRSSPLSFPSVPQEETLRQ
sp|Q76FK4|NOL8_HUMAN_331	R.TTQPSINESESphosDPFEVVRDDFK.S	R.TTQPSINESESphosDPFEVVRDDFK.S	-3.0128	0.0482515	1	3	sp|Q76FK4|NOL8_HUMAN	STYX	NR	0.9727	0.9495	0.749	0.992	ENLQRTTQPSINESESDPFEVVRDDFKSGVH
sp|Q9Y4E8|UBP15_HUMAN_226 229	R.GPSTphosPKSphosPGASNFSTLPK.L	R.GPSTphosPKSphosPGASNFSTLPK.L	-3.0128	-0.0466076	1	7	sp|Q9Y4E8|UBP15_HUMAN	STYX	NR	0.9733	0.9923	0.905	0.988	IEQKNEDGTWPRGPSTPKSPGASNFSTLPKI KNEDGTWPRGPSTPKSPGASNFSTLPKISPS
sp|Q2TAL8|QRIC1_HUMAN_343	A.VHVSphosGSPTALAAVK.L	R.GDPQQQSITHIAIPQEAYNAVHVSphosGSPTALAAVK.L	-2.97156	0.361804	2	2	sp|Q2TAL8|QRIC1_HUMAN	STYX	NR	0.988	1	0.499	0.497	THIAIPQEAYNAVHVSGSPTALAAVKLEDDK
sp|Q9UQE7|SMC3_HUMAN_1083 1085 1086_C	R.GSGSphosQ(SS)phosVPSVDQFTGVGIR.V	R.GSGSphosQ(SS)phosVPSVDQFTGVGIR.V	-2.93256	4.40024	2	2	sp|Q9UQE7|SMC3_HUMAN	STYQ	Q1	0.9952	0.991	0.664	0.634	QDEGEGSGESERGSGSQSSVPSVDQFTGVGI EGEGSGESERGSGSQSSVPSVDQFTGVGIRV GEGSGESERGSGSQSSVPSVDQFTGVGIRVS
sp|Q5SSJ5|HP1B3_HUMAN_142	K.TIPSWATLSASphosQLAR.A	K.TIPSWATLSASphosQLAR.A	-2.93033	3.43554	5	8	sp|Q5SSJ5|HP1B3_HUMAN	STYQ	Q1	1	1	0.988	0.996	KKVKKTIPSWATLSASQLARAQKQTPMASSP
sp|Q5W0B1|OBI1_HUMAN_60	R.VPITphosPENPCK.E	R.VPITphosPENPCK.E	-2.93033	-0.76737	1	2	sp|Q5W0B1|OBI1_HUMAN	STYX	Q4	0.9952	0.9998	1	1	WLKNNSQCPACRVPITPENPCKEIIGGTSES
sp|Q53RY4|KCP3_HUMAN_214	K.DGLQGQLEEMTELESphosPK.C	R.KDGLQGQLEEMTELESphosPK.C	-2.93033	0.570673	1	1	sp|Q53RY4|KCP3_HUMAN	STYX	NR	1	0.9817	0.892	0.896	KDGLQGQLEEMTELESPKCKRQENEQLLDQN
sp|Q6P1L5|F117B_HUMAN_10	R.NGSphosPTPAGSLGGGAVATAGGPGSR.L	R.NGSphosPTPAGSLGGGAVATAGGPGSR.L	-2.93033	-0.41118	3	11	sp|Q6P1L5|F117B_HUMAN	STYX	NR	1	1	0.996	0.997	______MSQRVRRNGSPTPAGSLGGGAVATA
sp|Q9NYV4|CDK12_HUMAN_228	R.KWSphosDSSK.Q	R.KWSphosDSSK.Q	-2.93033	0.0217793	1	1	sp|Q9NYV4|CDK12_HUMAN	STYX	NR	0.9436	0.9715	0.993	0.95	VDSPKRRSRSPHRKWSDSSKQDDSPSGASYG
sp|Q9P2N5|RBM27_HUMAN_914	K.RLSphosSGEDTTELR.K	K.RLSphosSGEDTTELR.K	-2.93033	-0.163253	1	2	sp|Q9P2N5|RBM27_HUMAN	STYX	NR	0.994	1	0.955	0.969	QKELLDTELDLHKRLSSGEDTTELRKKLSQL
sp|Q7Z333|SETX_HUMAN_952	K.SDTphosLTDSQIDRDLHK.L	K.SDTphosLTDSQIDRDLHK.L	-2.9171	1.67256	2	4	sp|Q7Z333|SETX_HUMAN	STYX	Q1	0.9999	0.9999	0.538	0.547	NLTREQAPDISPKSDTLTDSQIDRDLHKLSL
sp|P38398|BRCA1_HUMAN_753	K.DLMLSphosGER.V	K.DLMLSphosGER.V	-2.89133	2.39364	2	6	sp|P38398|BRCA1_HUMAN	STYX	Q1	0.9946	0.9999	1	1	VKVSNNAEDPKDLMLSGERVLQTERSVESSS
sp|O00151|PDLI1_HUMAN_213 214 215_C	K.QELNEPPKQ(STS)phosFLVLQEILESEEK.G	K.Q(STS)phosFLVLQEILESEEKGDPNKPSGFR.S	-2.87879	6.55075	2	1	sp|O00151|PDLI1_HUMAN	STYX	Q1	0.9999	0.9992	1	0.998	KMLQEKQELNEPPKQSTSFLVLQEILESEEK MLQEKQELNEPPKQSTSFLVLQEILESEEKG LQEKQELNEPPKQSTSFLVLQEILESEEKGD
sp|Q9P265|DIP2B_HUMAN_203	K.GTSGSphosLADVFANTR.L	K.GTSGSphosLADVFANTR.L	-2.87259	0.316484	2	2	sp|Q9P265|DIP2B_HUMAN	STYX	NR	1	1	0.875	0.893	ASSTLSHGEVKGTSGSLADVFANTRIENFSA
sp|Q9NQG7|HPS4_HUMAN_202 203_C	R.SPHILAGCILYKGLIV(ST)phosQLPPSLTAK.V	R.SPHILAGCILYKGLIV(ST)phosQLPPSLTAK.V	-2.85233	-0.978221	1	1	sp|Q9NQG7|HPS4_HUMAN	STYQ	Q4	0.9238	0.9817	0.526	0.727	PHILAGCILYKGLIVSTQLPPSLTAKVLLHR HILAGCILYKGLIVSTQLPPSLTAKVLLHRT
sp|O43852|CALU_HUMAN_69	K.TFDQLTPEESphosKER.L	K.TFDQLTPEESphosKER.L	-2.85233	-0.063044	1	2	sp|O43852|CALU_HUMAN	STYX	NR	0.9973	1	0.995	0.992	GAEEAKTFDQLTPEESKERLGKIVSKIDGDK
sp|O94916|NFAT5_HUMAN_561	K.EISSphosPARPCSFEEAMK.A	K.EISSphosPARPCSFEEAMK.A	-2.85233	0.52428	1	1	sp|O94916|NFAT5_HUMAN	STYX	NR	0.9997	0.9999	0.92	0.952	AAAGALNVNVKKEISSPARPCSFEEAMKAMK
sp|P68104|EF1A1_HUMAN_141 142_C	R.EHALLA(YT)phosLGVK.Q	R.EHALLA(YT)phosLGVK.Q	-2.85233	0.173782	1	1	sp|P68104|EF1A1_HUMAN	STYX	NR	0.9998	0.9998	1	1	GISKNGQTREHALLAYTLGVKQLIVGVNKMD ISKNGQTREHALLAYTLGVKQLIVGVNKMDS
sp|Q5THJ4|VP13D_HUMAN_1761 1765	K.EVQDKDYPLTphosPPPSphosPTVDEPK.L	K.EVQDKDYPLTphosPPPSphosPTVDEPK.L	-2.85233	0.00835882	3	5	sp|Q5THJ4|VP13D_HUMAN	STYX	NR	0.9998	1	0.991	0.991	SRKKQKEVQDKDYPLTPPPSPTVDEPKILVG QKEVQDKDYPLTPPPSPTVDEPKILVGKSKF
sp|Q96EV2|RBM33_HUMAN_849	R.LAQQQQQLYAPPPPAEQEEQALSphosPSPTNGNPLLPFPGAQVR.Q	L.YAPPPPAEQEEQALSphosPSPTNGNPLLPFPGAQVR.Q	-2.85233	-0.0677898	1	12	sp|Q96EV2|RBM33_HUMAN	STYX	NR	1	1	0.411	0.987	LYAPPPPAEQEEQALSPSPTNGNPLLPFPGA
tr|E9PMV1|E9PMV1_HUMAN_48	R.SGGGAGSphosNGSVLDPAER.A	R.SGGGAGSphosNGSVLDPAER.A	-2.85233	0.354355	1	6	tr|E9PMV1|E9PMV1_HUMAN	STYX	NR	0.9286	1	0.96	0.995	LGKTQRSRRSGGGAGSNGSVLDPAERAVIRI
sp|Q8N6S5|AR6P6_HUMAN_80	K.RSVLPPDGNGSphosPVLPDK.R	R.SVLPPDGNGSphosPVLPDKR.N	-2.78768	-0.154514	2	12	sp|Q8N6S5|AR6P6_HUMAN	STYX	NR	0.9603	1	0.995	0.995	SEPRKRSVLPPDGNGSPVLPDKRNGIFPAAA
sp|Q9C073|F117A_HUMAN_67	R.AASphosVPCSVAPEK.S	R.AASphosVPCSVAPEK.S	-2.78014	0.124873	2	7	sp|Q9C073|F117A_HUMAN	STYX	NR	0.999	0.9997	0.997	0.997	LQQPHQRRDGGGRAASVPCSVAPEKSVCRPQ
sp|Q14566|MCM6_HUMAN_762	K.EIESEIDSphosEEELINK.K	K.EIESEIDSphosEEELINK.K	-2.77833	4.18202	4	5	sp|Q14566|MCM6_HUMAN	STYX	Q1	1	1	0.998	0.998	ELVNWYLKEIESEIDSEEELINKKRIIEKVI
sp|Q99590|SCAFB_HUMAN_533	K.QDQISGLSphosQSEVK.T	K.QDQISGLSphosQSEVK.T	-2.77833	4.52074	3	3	sp|Q99590|SCAFB_HUMAN	STYQ	Q1	1	0.9998	0.979	0.985	KGGDPLEKQDQISGLSQSEVKTDVCTVHLPN
sp|P78364|PHC1_HUMAN_898	R.GSDNSSYDEALSPTSphosPGPLSVR.A	R.GSDNSSYDEALSPTSphosPGPLSVR.A	-2.77833	0.495711	1	1	sp|P78364|PHC1_HUMAN	STYX	NR	0.9713	0.9976	0.982	0.957	RGSDNSSYDEALSPTSPGPLSVRAGHGERDL
sp|Q13557|KCC2D_HUMAN_336 337_C	K.ESTESSN(TT)phosIEDEDVK.A	K.ESTESSN(TT)phosIEDEDVK.A	-2.77833	-0.0966475	1	12	sp|Q13557|KCC2D_HUMAN	STYX	NR	0.9983	0.9987	0.994	0.996	LKKPDGVKESTESSNTTIEDEDVKARKQEII KKPDGVKESTESSNTTIEDEDVKARKQEIIK
sp|Q9UGV2|NDRG3_HUMAN_331 332 333 334 335_C	R.SRTH(STSSS)phosLGSGESPFSR.S	R.TH(STSSS)phosLGSGESPFSR.S	-2.77833	0.0217793	1	19	sp|Q9UGV2|NDRG3_HUMAN	STYX	NR	0.9628	0.9966	0.998	1.993	IPSASMTRLARSRTHSTSSSLGSGESPFSRS PSASMTRLARSRTHSTSSSLGSGESPFSRSV SASMTRLARSRTHSTSSSLGSGESPFSRSVT ASMTRLARSRTHSTSSSLGSGESPFSRSVTS SMTRLARSRTHSTSSSLGSGESPFSRSVTSN
sp|P28290|ITPI2_HUMAN_352	K.KESphosSSMLATVK.E	K.KKESphosSSMLATVK.E	-2.75332	-0.0466756	2	4	sp|P28290|ITPI2_HUMAN	STYX	NR	1	0.9999	0.992	0.947	NKNDQKSQKIMKKKESSSMLATVKEEVSGSS
sp|P51825|AFF1_HUMAN_619 620_C	R.(TS)phosLQGEREPGLLPYGSR.D	R.(TS)phosLQGEREPGLLPYGSR.D	-2.74854	0.798273	2	3	sp|P51825|AFF1_HUMAN	STYX	Q1	0.9601	0.9999	0.954	0.994	QPKKPVKASARAGSRTSLQGEREPGLLPYGS PKKPVKASARAGSRTSLQGEREPGLLPYGSR
sp|O43719|HTSF1_HUMAN_481	K.RGFEGSCSphosQK.E	K.RGFEGSCSphosQKESEEGNPVR.G	-2.74314	2.79241	12	15	sp|O43719|HTSF1_HUMAN	STYQ	Q1	1	1	0.996	0.997	ESEEGCPKRGFEGSCSQKESEEGNPVRGSEE
sp|O15085|ARHGB_HUMAN_35	R.QPSphosDASETTGLVQR.C	R.QPSphosDASETTGLVQR.C	-2.70958	-0.438517	2	6	sp|O15085|ARHGB_HUMAN	STYX	NR	0.9986	1	0.707	0.996	DSAPERKSPSHHRQPSDASETTGLVQRCVII
sp|Q9UQ35|SRRM2_HUMAN_1233	K.EQNSALPTSSphosQDEELMEVVEK.S	K.EQNSALPTSSphosQDEELMEVVEK.S	-2.70794	3.39101	5	3	sp|Q9UQ35|SRRM2_HUMAN	STYQ	Q1	1	1	0.983	0.969	SSPETKEQNSALPTSSQDEELMEVVEKSEEP
sp|Q9UQE7|SMC3_HUMAN_1083	R.GSGSphosQSSVPSVDQFTGVGIR.V	R.GSGSphosQSSVPSVDQFTGVGIR.V	-2.70794	3.86122	7	8	sp|Q9UQE7|SMC3_HUMAN	STYQ	Q1	0.9988	0.9992	0.98	0.976	QDEGEGSGESERGSGSQSSVPSVDQFTGVGI
sp|Q13683|ITA7_HUMAN_356	P.EVMLSphosGER.L	P.EVMLSphosGER.L	-2.70794	0.225485	1	2	sp|Q13683|ITA7_HUMAN	STYX	NR	0.9621	0.9519	1	1	LRKDSASRLVPEVMLSGERLTSGFGYSLAVA
sp|Q5TDH0|DDI2_HUMAN_127	R.QRQPPGTQQSHSSPGEITSphosSPQGLDNPALLR.D	R.QPPGTQQSHSSPGEITSphosSPQGLDNPALLR.D	-2.70794	0.667771	1	1	sp|Q5TDH0|DDI2_HUMAN	STYX	NR	0.9343	0.995	0.974	0.96	PPGTQQSHSSPGEITSSPQGLDNPALLRDML
sp|Q6P0Q8|MAST2_HUMAN_1249 1250_C	R.SL(SS)phosLNR.S	R.SL(SS)phosLNR.S	-2.70794	0.58882	1	1	sp|Q6P0Q8|MAST2_HUMAN	STYX	NR	0.9614	0.9364	0.655	0.683	KITKQASLLHTSRSLSSLNRSLSSGESGPGS ITKQASLLHTSRSLSSLNRSLSSGESGPGSP
sp|Q9H0E3|SP130_HUMAN_465	R.ASphosPNPVAMETR.S	R.ASphosPNPVAMETR.S	-2.70794	0.0997818	5	3	sp|Q9H0E3|SP130_HUMAN	STYX	NR	0.9998	0.9999	0.998	0.998	PAERSSLIPISGHRASPNPVAMETRSDNRPS
sp|Q12888|TP53B_HUMAN_831	K.SGTAETEPVEQDSSphosQPSLPLVR.A	K.SGTAETEPVEQDSSphosQPSLPLVR.A	-2.67751	2.70568	12	23	sp|Q12888|TP53B_HUMAN	STYQ	Q1	0.9991	0.9994	0.993	0.988	LKSGTAETEPVEQDSSQPSLPLVRADDPLRL
sp|P01100|FOS_HUMAN_362 363 364_C	R.KG(SSS)phosNEPSSDSLSSPTLLAL.-	R.KG(SSS)phosNEPSSDSLSSPTLLAL.-	-2.67438	2.04825	8	3	sp|P01100|FOS_HUMAN	STYX	Q1	0.9958	0.9999	1.17	0.999	EADSFPSCAAAHRKGSSSNEPSSDSLSSPTL ADSFPSCAAAHRKGSSSNEPSSDSLSSPTLL DSFPSCAAAHRKGSSSNEPSSDSLSSPTLLA
sp|P49750|YLPM1_HUMAN_825 826 827_C	F.YITP(STS)phosLSPR.Q	R.GPASQFYITP(STS)phosLSPR.Q	-2.67127	0.0187426	2	4	sp|P49750|YLPM1_HUMAN	STYX	NR	0.9967	0.9997	0.527	0.934	GMIPRGPASQFYITPSTSLSPRQSGPQWKGP MIPRGPASQFYITPSTSLSPRQSGPQWKGPK IPRGPASQFYITPSTSLSPRQSGPQWKGPKP
sp|Q14160|SCRIB_HUMAN_1276	R.ALAAVPSphosAGSVQR.V	R.ALAAVPSphosAGSVQR.V	-2.66508	-0.306843	2	7	sp|Q14160|SCRIB_HUMAN	STYX	NR	0.9584	0.9999	0.981	0.987	LQPLKLDYRALAAVPSAGSVQRVPSGAAGGK
sp|P58340|MLF1_HUMAN_7 8_C	R.MLN(SS)phosFEDDPFFSESILAHR.E	R.MLN(SS)phosFEDDPFFSESILAHR.E	-2.64083	1.44182	1	1	sp|P58340|MLF1_HUMAN	STYX	Q1	1	0.9992	1	0.998	_________MFRMLNSSFEDDPFFSESILAH ________MFRMLNSSFEDDPFFSESILAHR
sp|Q12888|TP53B_HUMAN_830 831_C	K.SGTAETEPVEQD(SS)phosQPSLPLVR.A	K.SGTAETEPVEQD(SS)phosQPSLPLVR.A	-2.64083	2.60972	19	36	sp|Q12888|TP53B_HUMAN	STYQ	Q1	0.9983	0.9989	1	1	DLKSGTAETEPVEQDSSQPSLPLVRADDPLR LKSGTAETEPVEQDSSQPSLPLVRADDPLRL
sp|Q6PJT7|ZC3HE_HUMAN_135	R.VSTSSphosQESK.T	R.VSTSSphosQESK.T	-2.64083	1.11429	1	2	sp|Q6PJT7|ZC3HE_HUMAN	STYQ	Q1	0.9904	0.9995	0.917	0.96	PSARPEKRDSRVSTSSQESKTTNVRQTYDDG
sp|P56962|STX17_HUMAN_287 288 289_C	K.L(TSS)phosCPDLPSQTDKK.C	K.L(TSS)phosCPDLPSQTDKK.C	-2.64083	-0.583361	1	3	sp|P56962|STX17_HUMAN	STYX	NR	0.9993	1	0.998	1	GKLIQRKKQKMMEKLTSSCPDLPSQTDKKCS KLIQRKKQKMMEKLTSSCPDLPSQTDKKCS_ LIQRKKQKMMEKLTSSCPDLPSQTDKKCS__
sp|Q9P275|UBP36_HUMAN_18	R.KDSphosADDGELGK.L	R.KDSphosADDGELGK.L	-2.60876	-0.209887	2	2	sp|Q9P275|UBP36_HUMAN	STYX	NR	1	1	1	1	IVDKLKEALKPGRKDSADDGELGKLLASSAK
sp|Q8TF01|PNISR_HUMAN_465	K.EQNSphosLSLLEAR.E	K.EQNSphosLSLLEAR.E	-2.5767	1.46636	3	2	sp|Q8TF01|PNISR_HUMAN	STYX	Q1	0.9995	0.9998	0.993	0.959	RVTKEMNEFIHKEQNSLSLLEAREADGDVVN
sp|Q9UQ35|SRRM2_HUMAN_1231 1232 1233_C	K.EQNSALP(TSS)phosQDEELMEVVEK.S	K.EQNSALP(TSS)phosQDEELMEVVEK.S	-2.5767	3.11081	28	29	sp|Q9UQ35|SRRM2_HUMAN	STYQ	Q1	1	1	1	1	AGSSPETKEQNSALPTSSQDEELMEVVEKSE GSSPETKEQNSALPTSSQDEELMEVVEKSEE SSPETKEQNSALPTSSQDEELMEVVEKSEEP
sp|P29590|PML_HUMAN_866 867_C	R.AEGV(ST)phosPLAGR.G	R.AEGV(ST)phosPLAGR.G	-2.5767	-0.850465	3	3	sp|P29590|PML_HUMAN	STYX	Q4	0.9996	0.9999	1	1	EGLLEGPALARAEGVSTPLAGRGLAERASQQ GLLEGPALARAEGVSTPLAGRGLAERASQQS
sp|Q9Y2W1|TR150_HUMAN_622	R.SIFQHIQSAQSQRSphosPSELFAQ.H	R.SIFQHIQSAQSQRSphosPSELFAQ.H	-2.5767	-1.1184	1	1	sp|Q9Y2W1|TR150_HUMAN	STYX	Q4	1	0.9045	0.626	0.485	FRSIFQHIQSAQSQRSPSELFAQHIVTIVHH
sp|Q07157|ZO1_HUMAN_178 179_C	R.SVA(SS)phosQPAKPTK.V	R.SVA(SS)phosQPAKPTK.V	-2.5767	-0.315873	5	2	sp|Q07157|ZO1_HUMAN	STYQ	NR	0.9998	0.9982	0.998	0.991	RERSLSPRSDRRSVASSQPAKPTKVTLVKSR ERSLSPRSDRRSVASSQPAKPTKVTLVKSRK
sp|P49321|NASP_HUMAN_421	K.LVPSphosQEETKLSVEESEAAGDGVDTK.V	K.LVPSphosQEETK.L	-2.53562	5.35568	4	5	sp|P49321|NASP_HUMAN	STYQ	Q1	0.9999	1	0.991	0.994	DGSGLEEKVRAKLVPSQEETKLSVEESEAAG
sp|Q9BTV7|CABL2_HUMAN_130	R.CSphosLEFLEDAVGCAPAQR.T	R.CSphosLEFLEDAVGCAPAQR.T	-2.52666	2.7036	2	1	sp|Q9BTV7|CABL2_HUMAN	STYX	Q1	0.9999	0.9988	1	1	LDGQRQRKRVTSQRCSLEFLEDAVGCAPAQR
sp|Q6VMQ6|MCAF1_HUMAN_899	R.TSLPTVGPSGLYSphosPSTNR.G	R.TSLPTVGPSGLYSphosPSTNR.G	-2.52666	-0.358069	2	5	sp|Q6VMQ6|MCAF1_HUMAN	STYX	NR	0.998	0.9992	0.971	0.969	ATRTSLPTVGPSGLYSPSTNRGPIQMKIPIS
sp|P82094|TMF1_HUMAN_333	R.IDSFSVQSphosLDSR.S	R.IDSFSVQSphosLDSR.S	-2.51655	-4.14815	2	1	sp|P82094|TMF1_HUMAN	STYX	Q4	0.9997	0.9998	0.996	0.982	CSSDAFERIDSFSVQSLDSRSVSEINSDDEL
sp|O43719|HTSF1_HUMAN_479	R.GFEGSphosCSQKESEEGNPVR.G	R.GFEGSphosCSQK.E	-2.5153	2.62664	5	12	sp|O43719|HTSF1_HUMAN	STYX	Q1	1	1	0.911	0.926	EKESEEGCPKRGFEGSCSQKESEEGNPVRGS
sp|P55036|PSMD4_HUMAN_266	K.MTISphosQQEFGR.T	K.MTISphosQQEFGR.T	-2.5153	3.08067	7	5	sp|P55036|PSMD4_HUMAN	STYQ	Q1	0.9996	0.9998	0.994	0.99	TGTEDSDDALLKMTISQQEFGRTGLPDLSSM
sp|Q13286|CLN3_HUMAN_12	R.RFSphosDSEGEETVPEPR.L	R.RFSphosDSEGEETVPEPR.L	-2.5153	0.0350762	3	4	sp|Q13286|CLN3_HUMAN	STYX	NR	1	1	0.992	0.945	____MGGCAGSRRRFSDSEGEETVPEPRLPL
sp|Q5U623|MCAF2_HUMAN_416	K.NLESVNSphosPIEK.S	K.NLESVNSphosPIEK.S	-2.5153	0.131065	1	2	sp|Q5U623|MCAF2_HUMAN	STYX	NR	0.9997	0.9999	0.993	0.99	NSEAMILDKNLESVNSPIEKSSVNYEPSNPS
sp|Q9H7N4|SFR19_HUMAN_933	R.SGGGSphosGGSGGQVSLKK.S	R.SGGGSphosGGSGGQVSLK.K	-2.5153	-0.340791	1	2	sp|Q9H7N4|SFR19_HUMAN	STYX	NR	0.9944	1	0.712	0.996	TKPSKTRKKVRSGGGSGGSGGQVSLKKSKAD
sp|P14859|PO2F1_HUMAN_270	R.TIAATPIQTLPQSQSTphosPK.R	R.TIAATPIQTLPQSQSTphosPK.R	-2.5103	-0.0188626	4	5	sp|P14859|PO2F1_HUMAN	STYX	NR	0.9978	0.9996	0.95	0.954	TIAATPIQTLPQSQSTPKRIDTPSLEEPSDL
sp|P01100|FOS_HUMAN_373 374_C	R.KGSSSNEPSSDSL(SS)phosPTLLAL.-	R.KGSSSNEPSSDSL(SS)phosPTLLAL.-	-2.48585	2.41262	4	4	sp|P01100|FOS_HUMAN	STYX	Q1	0.9995	0.9998	0.653	0.95	HRKGSSSNEPSSDSLSSPTLLAL________ RKGSSSNEPSSDSLSSPTLLAL_________
sp|P28749|RBL1_HUMAN_749	K.VKSphosPVSLTAHSLIGASPK.Q	K.VKSphosPVSLTAHSLIGASPK.Q	-2.46453	0.124873	2	17	sp|P28749|RBL1_HUMAN	STYX	NR	1	1	0.994	0.998	LIPLSMNTNQESKVKSPVSLTAHSLIGASPK
tr|I3L2J0|I3L2J0_HUMAN_780	R.SRQPSphosPLLLLPPPAGLTSDPGPSVR.R	R.SRQPSphosPLLLLPPPAGLTSDPGPSVR.R	-2.45756	-0.103752	6	15	tr|I3L2J0|I3L2J0_HUMAN	STYX	NR	1	1	0.996	0.997	RAVSPAVPFSRSRQPSPLLLLPPPAGLTSDP
sp|O60885|BRD4_HUMAN_598 599_C	K.SKPPP(TY)phosESEEEDKCKPM.S	K.SKPPP(TY)phosESEEEDK.C	-2.4564	1.44182	3	3	sp|O60885|BRD4_HUMAN	STYX	Q1	0.9996	0.9987	0.935	0.666	VSKKEPAPMKSKPPPTYESEEEDKCKPMSYE SKKEPAPMKSKPPPTYESEEEDKCKPMSYEE
sp|Q13435|SF3B2_HUMAN_289	R.QEEMNSphosQQEEEEMETDAR.S	R.QEEMNSphosQQEEEEMETDAR.S	-2.4564	3.00117	7	8	sp|Q13435|SF3B2_HUMAN	STYQ	Q1	1	1	0.998	0.998	EKILQLKESRQEEMNSQQEEEEMETDARSSL
sp|Q9C0D7|ZC12C_HUMAN_752	R.IDSISphosDSR.L	R.IDSISphosDSR.L	-2.4564	-0.306453	1	2	sp|Q9C0D7|ZC12C_HUMAN	STYX	NR	0.9946	0.9976	0.984	0.973	PHLGRSLVATRIDSISDSRLYDSSPSRQRKP
sp|Q86YC2|PALB2_HUMAN_454	K.NLNLSphosNEETDQSEIR.M	K.NLNLSphosNEETDQSEIR.M	-2.45065	2.19088	2	6	sp|Q86YC2|PALB2_HUMAN	STYX	Q1	1	1	0.998	0.997	GFKNKNKDASKNLNLSNEETDQSEIRMSGTC
sp|Q8TDI0|CHD5_HUMAN_1217	K.FGTEELFKDDVEGMMSQGQRPVTphosPIPDVQSSK.G	K.FGTEELFKDDVEGMMSQGQRPVTphosPIPDVQSSK.G	-2.45065	-0.375985	2	2	sp|Q8TDI0|CHD5_HUMAN	STYX	NR	1	1	0.997	0.996	KDDVEGMMSQGQRPVTPIPDVQSSKGGNLAA
sp|P01100|FOS_HUMAN_362	R.KGSphosSSNEPSSDSLSSPTLLAL.-	R.KGSphosSSNEPSSDSLSSPTLLAL.-	-2.42811	1.22109	2	1	sp|P01100|FOS_HUMAN	STYX	Q1	0.9967	0.9984	0.946	0.953	EADSFPSCAAAHRKGSSSNEPSSDSLSSPTL
sp|Q96B01|R51A1_HUMAN_120	K.ELPTVTTNVQNSphosQDKSIEK.H	K.ELPTVTTNVQNSphosQDK.S	-2.42811	2.93394	6	16	sp|Q96B01|R51A1_HUMAN	STYQ	Q1	1	1	0.984	0.997	LSVKELPTVTTNVQNSQDKSIEKHGSSKIET
sp|Q9Y5K6|CD2AP_HUMAN_256	K.TQSphosVEITK.T	K.TQSphosVEITK.T	-2.41165	-0.826218	4	9	sp|Q9Y5K6|CD2AP_HUMAN	STYX	Q4	1	0.9999	0.992	0.996	PEKPLILQSLGPKTQSVEITKTDTEGKIKAK
sp|O00567|NOP56_HUMAN_591	K.FHKASphosQED.-	K.FHKASphosQED.-	-2.39982	0.928578	1	2	sp|O00567|NOP56_HUMAN	STYQ	Q1	0.9661	0.9687	1	1	VGKSSSKKKKKFHKASQED____________
sp|P18583|SON_HUMAN_2357	R.SphosGNFSAAMK.D	R.SphosGNFSAAMK.D	-2.39982	0.676283	1	2	sp|P18583|SON_HUMAN	STYX	Q1	0.9991	0.9999	0.946	0.995	DRKGLVAVGERAQKRSGNFSAAMKDLSGKHP
sp|Q14566|MCM6_HUMAN_13	A.AEPGAGSphosQHLEVR.D	A.AEPGAGSphosQHLEVR.D	-2.39982	4.00643	11	12	sp|Q14566|MCM6_HUMAN	STYQ	Q1	1	1	1	1	___MDLAAAAEPGAGSQHLEVRDEVAEKCQK
sp|Q92945|FUBP2_HUMAN_125	K.KLASphosQGDSISSQLGPIHPPPR.T	K.LASphosQGDSISSQLGPIHPPPR.T	-2.39982	3.00976	1	20	sp|Q92945|FUBP2_HUMAN	STYQ	Q1	1	1	0.995	0.996	RQLEDGDQPESKKLASQGDSISSQLGPIHPP
sp|Q8N1G4|LRC47_HUMAN_315	R.VLHVSphosENPVPLTVR.V	R.VLHVSphosENPVPLTVR.V	-2.39982	-0.290165	1	3	sp|Q8N1G4|LRC47_HUMAN	STYX	NR	0.999	0.9998	0.981	0.998	DVGDAGRLLLRVLHVSENPVPLTVRVSPEVR
sp|Q9NYF8|BCLF1_HUMAN_494	K.KETphosQSPEQVK.S	K.KETphosQSPEQVKSEK.L	-2.39982	0.289217	2	4	sp|Q9NYF8|BCLF1_HUMAN	STYQ	NR	0.9891	0.9989	0.5	0.5	KEEDKNSERITVKKETQSPEQVKSEKLKDLF
sp|Q9UQ35|SRRM2_HUMAN_454	R.EISphosSSPTSK.N	R.EISphosSSPTSK.N	-2.39982	0.28926	1	1	sp|Q9UQ35|SRRM2_HUMAN	STYX	NR	0.9606	0.9981	0.947	0.957	ESPKPAPAPGSHREISSSPTSKNRSHGRAKR
sp|P43243|MATR3_HUMAN_533	R.MKSphosQAFIEMETR.E	R.MKSphosQAFIEMETR.E	-2.37879	2.66939	4	4	sp|P43243|MATR3_HUMAN	STYQ	Q1	0.9995	0.9994	0.997	0.998	EPYGKIKNYILMRMKSQAFIEMETREDAMAM
sp|Q7KZI7|MARK2_HUMAN_409	R.RFSphosDQAAGPAIPTSNSYSK.K	R.RFSphosDQAAGPAIPTSNSYSK.K	-2.35433	-1.24126	2	1	sp|Q7KZI7|MARK2_HUMAN	STYX	Q4	0.9997	1	0.998	0.999	KVQRSVSANPKQRRFSDQAAGPAIPTSNSYS
sp|Q5UIP0|RIF1_HUMAN_1542	R.RASphosQGLLSSIENSESDSSEAKEEGSR.K	R.RASphosQGLLSSIENSESDSSEAK.E	-2.35233	0.0482515	2	2	sp|Q5UIP0|RIF1_HUMAN	STYQ	NR	0.992	1	0.997	0.998	EKLVRGRTRYQTRRASQGLLSSIENSESDSS
sp|O94887|FARP2_HUMAN_425 426 427 428_C	K.D(SSSS)phosLTDPQVSYVK.S	K.D(SSSS)phosLTDPQVSYVK.S	-2.34835	0.800693	2	2	sp|O94887|FARP2_HUMAN	STYX	Q1	0.9864	0.9939	0.999	0.998	SPSTLVPSGLPEFKDSSSSLTDPQVSYVKSP PSTLVPSGLPEFKDSSSSLTDPQVSYVKSPA STLVPSGLPEFKDSSSSLTDPQVSYVKSPAA TLVPSGLPEFKDSSSSLTDPQVSYVKSPAAE
sp|Q9NRR5|UBQL4_HUMAN_315 316 317 318_C	R.EQFGNNPFSSLAGNSD(SSSS)phosQPLR.T	R.EQFGNNPFSSLAGNSD(SSSS)phosQPLR.T	-2.34537	2.95689	1	3	sp|Q9NRR5|UBQL4_HUMAN	STYQ	Q1	0.9922	0.9992	0.981	0.995	QFGNNPFSSLAGNSDSSSSQPLRTENREPLP FGNNPFSSLAGNSDSSSSQPLRTENREPLPN GNNPFSSLAGNSDSSSSQPLRTENREPLPNP NNPFSSLAGNSDSSSSQPLRTENREPLPNPW
sp|P06748|NPM_HUMAN_75	K.DELHIVEAEAMNYEGSPIKVTphosLATLK.M	K.DELHIVEAEAMNYEGSPIKVTphosLATLK.M	-2.34537	-2.73311	3	1	sp|P06748|NPM_HUMAN	STYX	Q4	1	0.988	0.583	0.48	VEAEAMNYEGSPIKVTLATLKMSVQPTVSLG
sp|Q86YW9|MD12L_HUMAN_678	R.RMSphosVNCEK.L	R.RMSphosVNCEK.L	-2.34537	-0.193949	1	1	sp|Q86YW9|MD12L_HUMAN	STYX	NR	0.9917	0.9916	1	1	GESCENANTSLGRRMSVNCEKLVKREKPREL
sp|Q92667|AKAP1_HUMAN_107 108_C	R.RSE(SS)phosGILPNTTDMR.L	R.RSE(SS)phosGILPNTTDMR.L	-2.34537	-0.249855	3	4	sp|Q92667|AKAP1_HUMAN	STYX	NR	1	1	0.996	0.994	PPALLQTHPPCRRSESSGILPNTTDMRLRPG PALLQTHPPCRRSESSGILPNTTDMRLRPGT
sp|P35251|RFC1_HUMAN_190	K.ELSphosQNTDESGLNDEAIAK.Q	K.RKELSphosQNTDESGLNDEAIAK.Q	-2.30123	3.39101	4	18	sp|P35251|RFC1_HUMAN	STYQ	Q1	1	1	0.996	0.996	QRSNKKMVASKRKELSQNTDESGLNDEAIAK
sp|Q5T200|ZC3HD_HUMAN_238	R.KTSphosAVSSPLLDQQR.N	R.KTSphosAVSSPLLDQQR.N	-2.29382	0.377383	6	6	sp|Q5T200|ZC3HD_HUMAN	STYX	NR	1	1	0.996	0.991	SSPKSSSASKKDRKTSAVSSPLLDQQRNSKT
sp|Q96FS4|SIPA1_HUMAN_837	R.TEFLHSQNSphosLSPR.S	R.TEFLHSQNSphosLSPR.S	-2.29382	0.0404596	2	2	sp|Q96FS4|SIPA1_HUMAN	STYX	NR	0.9996	0.9999	0.87	0.496	GDLAEERTEFLHSQNSLSPRSSLSDEAPVLP
sp|Q9Y2X0|MED16_HUMAN_326	K.EGLPVNNIFQQISphosPVVGDKQPTILK.W	K.EGLPVNNIFQQISphosPVVGDKQPTILK.W	-2.29382	0.280845	6	4	sp|Q9Y2X0|MED16_HUMAN	STYX	NR	1	1	0.999	0.999	LRKEGLPVNNIFQQISPVVGDKQPTILKWRI
sp|P00519|ABL1_HUMAN_683	R.ESGGSGFRSphosPHLWK.K	R.ESGGSGFRSphosPHLWK.K	-2.2929	0.806051	1	1	sp|P00519|ABL1_HUMAN	STYX	Q1	0.9905	0.9983	0.977	0.785	VPNGALRESGGSGFRSPHLWKKSSTLTSSRL
sp|P06400|RB_HUMAN_624	R.VNSphosTANAETQATSAFQTQKPLK.S	R.VNSphosTANAETQATSAFQTQKPLK.S	-2.2929	0.624444	1	3	sp|P06400|RB_HUMAN	STYX	Q1	0.9948	0.9986	0.916	0.977	PVRSPKKKGSTTRVNSTANAETQATSAFQTQ
sp|P43243|MATR3_HUMAN_208	R.SphosQESGYYDR.M	R.SphosQESGYYDR.M	-2.2929	2.32217	1	8	sp|P43243|MATR3_HUMAN	STYQ	Q1	0.9989	0.9999	0.996	0.996	GPSLNPVLDYDHGSRSQESGYYDRMDYEDDR
sp|Q15435|PP1R7_HUMAN_12	R.GAGQQQSphosQEMMEVDR.R	R.GAGQQQSphosQEMMEVDR.R	-2.2929	3.32325	3	12	sp|Q15435|PP1R7_HUMAN	STYQ	Q1	1	1	1	1	____MAAERGAGQQQSQEMMEVDRRVESEES
sp|Q7Z333|SETX_HUMAN_954	K.SDTLTphosDSQIDRDLHK.L	K.SDTLTphosDSQIDRDLHK.L	-2.2929	2.02344	5	6	sp|Q7Z333|SETX_HUMAN	STYX	Q1	0.9995	0.9998	0.431	0.51	TREQAPDISPKSDTLTDSQIDRDLHKLSLLA
sp|Q92547|TOPB1_HUMAN_298	K.TMPNSSTphosPTSQINTIDSR.T	K.TMPNSSTphosPTSQINTIDSR.T	-2.2929	4.68105	1	1	sp|Q92547|TOPB1_HUMAN	STYX	Q1	0.9969	0.9983	0.962	0.926	KTEPRPEAKTMPNSSTPTSQINTIDSRTLSD
sp|Q9UKM9|RALY_HUMAN_151	R.VTphosVPLVR.R	R.VTphosVPLVR.R	-2.2929	2.69943	3	2	sp|Q9UKM9|RALY_HUMAN	STYX	Q1	0.9948	0.9968	1	1	PVPVPRAVPVKRPRVTVPLVRRVKTNVPVKL
sp|O75937|DNJC8_HUMAN_35	K.RDSphosVLTSK.N	K.RDSphosVLTSK.N	-2.2929	-0.133195	1	1	sp|O75937|DNJC8_HUMAN	STYX	NR	0.9884	0.9946	0.996	0.954	FMTFYSEVKQIEKRDSVLTSKNQIERLTRPG
sp|Q4L235|ACSF4_HUMAN_649	R.KLSphosDINQEEASGTSLHQK.A	R.KLSphosDINQEEASGTSLHQK.A	-2.2929	0.112382	1	2	sp|Q4L235|ACSF4_HUMAN	STYX	NR	0.9991	1	0.998	0.998	EDVTFRKSCATKRKLSDINQEEASGTSLHQK
sp|Q96AE4|FUBP1_HUMAN_140	K.IQIAPDSphosGGLPER.S	K.IQIAPDSphosGGLPER.S	-2.2929	-0.523655	1	2	sp|Q96AE4|FUBP1_HUMAN	STYX	NR	0.9989	0.9999	1	1	RIQQESGCKIQIAPDSGGLPERSCMLTGTPE
sp|Q96CB8|INT12_HUMAN_427	K.TTSESSSSphosPSASLKGPTSQESQLNAMK.R	K.TTSESSSSphosPSASLK.G	-2.2929	0.369941	1	4	sp|Q96CB8|INT12_HUMAN	STYX	NR	0.9932	0.9986	0.952	0.972	PSGSTTSKTTSESSSSPSASLKGPTSQESQL
sp|Q9NR09|BIRC6_HUMAN_3742	R.SASphosLSSAATTGLTTQQR.T	R.SASphosLSSAATTGLTTQQR.T	-2.2929	0.244172	1	3	sp|Q9NR09|BIRC6_HUMAN	STYX	NR	1	0.9986	0.992	0.994	GSHNLGAQQTSARSASLSSAATTGLTTQQRT
sp|Q9NQS7|INCE_HUMAN_119	K.LATVVGENGSphosVLR.R	K.LATVVGENGSphosVLR.R	-2.28285	-0.802371	2	3	sp|Q9NQS7|INCE_HUMAN	STYX	Q4	0.9983	0.9998	0.986	0.991	KDSVEKLATVVGENGSVLRRVTRAAAAAAAA
sp|P11142|HSP7C_HUMAN_541	R.DKVSSKNSphosLESYAFNMK.A	K.VSSKNSphosLESYAFNMK.A	-2.26937	0.0482515	2	3	sp|P11142|HSP7C_HUMAN	STYX	NR	0.9987	0.9931	0.961	0.996	KAEDEKQRDKVSSKNSLESYAFNMKATVEDE
sp|Q9NYH9|UTP6_HUMAN_286	R.ELEIESphosQTEEQPTTK.Q	R.ELEIESphosQTEEQPTTK.Q	-2.25351	2.21627	2	2	sp|Q9NYH9|UTP6_HUMAN	STYQ	Q1	0.9994	1	0.993	0.992	PLTWDYVARRELEIESQTEEQPTTKQAKAVE
sp|Q6IBW4|CNDH2_HUMAN_492	K.FVQETELSphosQR.L	K.FVQETELSphosQR.L	-2.25004	3.50051	2	1	sp|Q6IBW4|CNDH2_HUMAN	STYQ	Q1	0.9998	0.9999	0.959	0.969	LFIATSQKFVQETELSQRIRDWEDTVQPLLQ
sp|Q7Z333|SETX_HUMAN_956	K.SDTLTDSphosQIDRDLHK.L	K.SDTLTDSphosQIDR.D	-2.24314	2.29117	4	10	sp|Q7Z333|SETX_HUMAN	STYQ	Q1	1	1	0.997	0.995	EQAPDISPKSDTLTDSQIDRDLHKLSLLAQA
sp|O43149|ZZEF1_HUMAN_240	R.SphosPEMDKLK.S	R.SphosPEMDKLK.S	-2.24228	1.33681	3	4	sp|O43149|ZZEF1_HUMAN	STYX	Q1	0.9997	0.9999	1	1	QLVQKEKESPGDLTRSPEMDKLKSVAKCYAY
sp|O95747|OXSR1_HUMAN_425	K.TAQALSSGSphosGSQETK.L	K.TAQALSSGSphosGSQETK.L	-2.24228	1.28317	2	2	sp|O95747|OXSR1_HUMAN	STYX	Q1	0.9974	0.9931	0.49	0.493	PTAEPAKTAQALSSGSGSQETKIPISLVLRL
sp|P17096|HMGA1_HUMAN_8 9_C	K.(SS)phosQPLASK.Q	K.(SS)phosQPLASK.Q	-2.24228	3.07586	1	9	sp|P17096|HMGA1_HUMAN	STYQ	Q1	0.9817	0.9991	1	1	________MSESSSKSSQPLASKQEKDGTEK _______MSESSSKSSQPLASKQEKDGTEKR
sp|Q5UIP0|RIF1_HUMAN_1873	K.NVSphosQESLETK.E	K.NVSphosQESLETK.E	-2.24228	1.68052	7	5	sp|Q5UIP0|RIF1_HUMAN	STYQ	Q1	1	0.9996	0.996	0.996	NFKTVGPCLGDSKNVSQESLETKEEKPEETP
sp|Q13557|KCC2D_HUMAN_333 334_C	K.ESTE(SS)phosNTTIEDEDVK.A	K.ESTE(SS)phosNTTIEDEDVK.A	-2.24228	-0.273677	3	10	sp|Q13557|KCC2D_HUMAN	STYX	NR	0.9889	0.998	0.498	0.966	KSLLKKPDGVKESTESSNTTIEDEDVKARKQ SLLKKPDGVKESTESSNTTIEDEDVKARKQE
sp|Q52LW3|RHG29_HUMAN_488 489_C	K.HLN(SS)phosQPSGFGPANSLEDVVR.L	K.HLN(SS)phosQPSGFGPANSLEDVVR.L	-2.24228	0.221088	1	3	sp|Q52LW3|RHG29_HUMAN	STYQ	NR	1	1	0.637	0.511	TEEEKVDGNVNKHLNSSQPSGFGPANSLEDV EEEKVDGNVNKHLNSSQPSGFGPANSLEDVV
sp|Q96EE3|SEH1_HUMAN_179	R.AHSphosPMIAVGSDDSSPNAMAK.V	R.AHSphosPMIAVGSDDSSPNAMAK.V	-2.24228	0.0217793	1	9	sp|Q96EE3|SEH1_HUMAN	STYX	NR	1	1	0.999	0.999	SCSCISWNPSSSRAHSPMIAVGSDDSSPNAM
sp|Q9H3Z4|DNJC5_HUMAN_15	R.SLSTSGESphosLYHVLGLDK.N	R.SLSTSGESphosLYHVLGLDK.N	-2.24228	-0.249315	1	8	sp|Q9H3Z4|DNJC5_HUMAN	STYX	NR	0.9998	0.9993	0.892	0.993	_MADQRQRSLSTSGESLYHVLGLDKNATSDD
sp|Q01850|CDR2_HUMAN_344	R.GISphosLLHEVDTQYSALK.V	R.GISphosLLHEVDTQYSALK.V	-2.22784	0.0217793	10	3	sp|Q01850|CDR2_HUMAN	STYX	NR	1	1	0.999	0.998	ETCIRRAKAVKQRGISLLHEVDTQYSALKVK
sp|Q5THJ4|VP13D_HUMAN_1597 1598_C	K.ENGLFSH(SS)phosLSNTSQK.S	K.ENGLFSH(SS)phosLSNTSQK.S	-2.20631	0.259368	6	2	sp|Q5THJ4|VP13D_HUMAN	STYX	NR	0.9946	0.9959	0.988	0.99	GESSVERKENGLFSHSSLSNTSQKSLSVKEV ESSVERKENGLFSHSSLSNTSQKSLSVKEVK
sp|Q7Z3C6|ATG9A_HUMAN_14 15 16_C	R.LEA(SYS)phosDSPPGEEDLLVHVAEGSK.S	R.LEA(SYS)phosDSPPGEEDLLVHVAEGSK.S	-2.20143	0.0128184	2	2	sp|Q7Z3C6|ATG9A_HUMAN	STYX	NR	1	1	0.827	0.945	__MAQFDTEYQRLEASYSDSPPGEEDLLVHV _MAQFDTEYQRLEASYSDSPPGEEDLLVHVA MAQFDTEYQRLEASYSDSPPGEEDLLVHVAE
sp|P12268|IMDH2_HUMAN_425 426_C	K.HL(SS)phosQNR.Y	K.HL(SS)phosQNR.Y	-2.19417	1.45672	2	1	sp|P12268|IMDH2_HUMAN	STYQ	Q1	0.9802	0.9628	1	1	KYRGMGSLDAMDKHLSSQNRYFSEADKIKVA YRGMGSLDAMDKHLSSQNRYFSEADKIKVAQ
sp|P20711|DDC_HUMAN_390	K.HVQLSHEFESphosLVR.Q	K.HVQLSHEFESphosLVR.Q	-2.19337	-1.73311	1	1	sp|P20711|DDC_HUMAN	STYX	Q4	0.9646	0.9124	0.845	0.843	QAYIRKHVQLSHEFESLVRQDPRFEICVEVI
sp|Q9Y2X9|ZN281_HUMAN_799 800 801_C	K.NLE(SST)phosGFQIPSQELASQIDPQKDIEPR.T	K.NLE(SST)phosGFQIPSQELASQIDPQKDIEPR.T	-2.19337	-1.06068	3	3	sp|Q9Y2X9|ZN281_HUMAN	STYX	Q4	0.9973	0.9821	0.999	1	SSQKLTSQKEQKNLESSTGFQIPSQELASQI SQKLTSQKEQKNLESSTGFQIPSQELASQID QKLTSQKEQKNLESSTGFQIPSQELASQIDP
sp|O14646|CHD1_HUMAN_1689	R.SphosPFEHSVEHK.S	R.SphosPFEHSVEHK.S	-2.19337	-0.0329353	1	10	sp|O14646|CHD1_HUMAN	STYX	NR	0.9279	1	0.997	0.998	GPRSPLDQRSPYGSRSPFEHSVEHKSTPEHT
sp|P31269|HXA9_HUMAN_161	L.SLTDYACGSphosPPVDR.E	R.RGDCPTLDTHTLSLTDYACGSphosPPVDR.E	-2.19337	0.161659	1	2	sp|P31269|HXA9_HUMAN	STYX	NR	0.9915	0.9923	0.996	0.995	TLDTHTLSLTDYACGSPPVDREKQPSEGAFS
sp|P52292|IMA1_HUMAN_54 55_C	R.NV(SS)phosFPDDATSPLQENR.N	R.NV(SS)phosFPDDATSPLQENR.N	-2.19337	-0.448774	7	4	sp|P52292|IMA1_HUMAN	STYX	NR	1	0.9997	1	0.809	RKAKKDDQMLKRRNVSSFPDDATSPLQENRN KAKKDDQMLKRRNVSSFPDDATSPLQENRNN
sp|Q12830|BPTF_HUMAN_1671 1672 1673_C	K.KV(TSS)phosPITSEEESNLSNDFIDENGLPINK.N	K.V(TSS)phosPITSEEESNLSNDFIDENGLPINK.N	-2.19337	0.266892	3	5	sp|Q12830|BPTF_HUMAN	STYX	NR	0.9977	0.998	0.992	0.996	QVEDMEIETSEVKKVTSSPITSEEESNLSND VEDMEIETSEVKKVTSSPITSEEESNLSNDF EDMEIETSEVKKVTSSPITSEEESNLSNDFI
sp|Q6P6C2|ALKB5_HUMAN_64	K.YQEDSphosDPERSDYEEQQLQKEEEAR.K	K.YQEDSphosDPER.S	-2.19337	0.266892	1	3	sp|Q6P6C2|ALKB5_HUMAN	STYX	NR	0.9871	0.999	0.986	0.991	EPYPVSGAKRKYQEDSDPERSDYEEQQLQKE
sp|Q7L8J4|3BP5L_HUMAN_350	K.CDSphosVEHLR.G	K.CDSphosVEHLR.G	-2.19337	0.0868448	1	4	sp|Q7L8J4|3BP5L_HUMAN	STYX	NR	0.9998	0.9999	1	1	LLSLRTVASDLQKCDSVEHLRGLSDHVSLDG
sp|Q9H5H4|ZN768_HUMAN_23	R.EALPWGLEPQDVQSSDEMRSphosPEGYLR.G	R.SphosPEGYLR.G	-2.19337	-0.133195	3	3	sp|Q9H5H4|ZN768_HUMAN	STYX	NR	0.9998	1	0.994	0.978	WGLEPQDVQSSDEMRSPEGYLRGNMSENEEE
tr|A0A1B0GTL5|A0A1B0GTL5_HUMAN_913	R.LFTPSRSphosQEEEEEK.A	R.LFTPSRSphosQEEEEEK.A	-2.19337	-0.0466076	3	5	tr|A0A1B0GTL5|A0A1B0GTL5_HUMAN	STYQ	NR	0.9955	1	0.918	0.945	STPPPKPPRLFTPSRSQEEEEEKAAVGLSNR
sp|P78527|PRKDC_HUMAN_3205	K.LTPLPEDNSphosMNVDQDGDPSDRMEVQEQEEDISSLIR.S	K.LTPLPEDNSphosMNVDQDGDPSDR.M	-2.16508	2.76474	6	11	sp|P78527|PRKDC_HUMAN	STYX	Q1	1	1	0.998	0.998	LSKIEEKLTPLPEDNSMNVDQDGDPSDRMEV
sp|Q86YC2|PALB2_HUMAN_357	K.SLKSphosPSDTLDGR.N	K.SLKSphosPSDTLDGR.N	-2.14606	1.73042	1	3	sp|Q86YC2|PALB2_HUMAN	STYX	Q1	0.9891	0.9948	0.997	0.996	NQNLKEQNQTEKSLKSPSDTLDGRNENLQES
sp|Q9BTE3|MCMBP_HUMAN_160	R.VSPSTSYTphosPSR.H	R.VSPSTSYTphosPSR.H	-2.14606	0.691154	1	2	sp|Q9BTE3|MCMBP_HUMAN	STYX	Q1	0.9956	0.9978	0.939	0.953	YVNANQARVSPSTSYTPSRHKRSYEDDDDMD
sp|P35658|NU214_HUMAN_1312	K.LETphosPPSK.L	K.LETphosPPSK.L	-2.14606	-1.1184	1	3	sp|P35658|NU214_HUMAN	STYX	Q4	0.9916	0.9961	0.995	0.994	APSGTALSTTSSKLETPPSKLGELLFPSSLA
sp|Q99959|PKP2_HUMAN_82	R.TSSphosVPEYVYNLHLVENDFVGGR.S	R.TSSphosVPEYVYNLHLVENDFVGGR.S	-2.14606	-0.496255	3	2	sp|Q99959|PKP2_HUMAN	STYX	NR	0.9948	0.998	0.978	0.98	KGRSSVGNGNLHRTSSVPEYVYNLHLVENDF
sp|Q13111|CAF1A_HUMAN_199	R.RGDSphosQECSPR.S	R.RGDSphosQECSPR.S	-2.12316	0.838105	2	2	sp|Q13111|CAF1A_HUMAN	STYQ	Q1	0.9988	1	0.996	0.995	EEEGVGCGGAGRRGDSQECSPRSCPELTSGP
sp|Q9P0P0|RN181_HUMAN_70	R.TVIRGSphosQAELK.C	R.TVIRGSphosQAELK.C	-2.10096	3.46534	2	3	sp|Q9P0P0|RN181_HUMAN	STYQ	Q1	0.9975	0.999	0.936	0.991	AKTVVENLPRTVIRGSQAELKCPVCLLEFEE
sp|Q13428|TCOF_HUMAN_1410	K.GSLGSphosQGAKDEPEEELQK.G	K.GSLGSphosQGAKDEPEEELQK.G	-2.10026	2.31674	5	15	sp|Q13428|TCOF_HUMAN	STYQ	Q1	1	1	0.993	0.993	ASGDVKEKKGKGSLGSQGAKDEPEEELQKGM
sp|Q14966|ZN638_HUMAN_641	R.CKSphosKNLEDDTLSECK.Q	K.SphosKNLEDDTLSECK.Q	-2.10026	1.13414	1	4	sp|Q14966|ZN638_HUMAN	STYX	Q1	0.9999	1	0.998	0.998	TKSDSNLGGHSIRCKSKNLEDDTLSECKQVS
sp|Q96GM8|TOE1_HUMAN_357 358_C	R.ALLNLPGTQ(TS)phosGEAK.D	R.ALLNLPGTQ(TS)phosGEAK.D	-2.10026	0.758745	3	3	sp|Q96GM8|TOE1_HUMAN	STYX	Q1	0.9995	0.9998	0.884	0.975	REKRKRALLNLPGTQTSGEAKDGPPKKQVCG EKRKRALLNLPGTQTSGEAKDGPPKKQVCGD
sp|Q9UDY2|ZO2_HUMAN_415	R.SFSphosPEER.R	R.SFSphosPEER.R	-2.10026	-1.37128	2	2	sp|Q9UDY2|ZO2_HUMAN	STYX	Q4	0.9986	0.9998	0.993	0.966	SEIEDISEIESNRSFSPEERRHQYSDYDYHS
sp|Q9UQ35|SRRM2_HUMAN_2170 2171_C	R.(TS)phosVPENHAQSR.L	R.(TS)phosVPENHAQSR.L	-2.10026	-0.563183	1	1	sp|Q9UQ35|SRRM2_HUMAN	STYX	Q4	0.9988	0.994	0.998	1	SMMDGPGPRIPDHQRTSVPENHAQSRIALAL MMDGPGPRIPDHQRTSVPENHAQSRIALALT
sp|Q15047|SETB1_HUMAN_1025 1026 1027_C	R.MEAEKA(STS)phosGLGIKDEGDIK.Q	R.MEAEKA(STS)phosGLGIKDEGDIK.Q	-2.10026	0.124873	1	3	sp|Q15047|SETB1_HUMAN	STYX	NR	0.9814	1	1	1.001	GEGRAGGSRMEAEKASTSGLGIKDEGDIKQA EGRAGGSRMEAEKASTSGLGIKDEGDIKQAK GRAGGSRMEAEKASTSGLGIKDEGDIKQAKK
sp|Q9UPY3|DICER_HUMAN_1142	R.TSSphosLENHDQMSVNCR.T	R.TSSphosLENHDQMSVNCR.T	-2.10026	-0.285889	1	6	sp|Q9UPY3|DICER_HUMAN	STYX	NR	0.9998	1	0.988	0.99	IVPENAAHQGANRTSSLENHDQMSVNCRTLL
sp|P28290|ITPI2_HUMAN_87 92	K.DCRTphosPLGASphosLDEQSSSTLK.G	K.DCRTphosPLGASphosLDEQSSSTLK.G	-2.06185	0.359407	2	2	sp|P28290|ITPI2_HUMAN	STYX	NR	0.981	0.9998	0.998	0.998	NVPNEKIAIWLKDCRTPLGASLDEQSSSTLK KIAIWLKDCRTPLGASLDEQSSSTLKGVLVR
sp|Q86U44|MTA70_HUMAN_350	K.DHTPSphosQELALTQSVGGDSSADR.L	K.DHTPSphosQELALTQSVGGDSSADR.L	-2.05586	4.75121	3	3	sp|Q86U44|MTA70_HUMAN	STYQ	Q1	1	1	0.996	0.997	ACMDSEAPGSKDHTPSQELALTQSVGGDSSA
sp|Q9Y6J9|TAF6L_HUMAN_589	R.LFQTAFPAPYGPSphosPASR.Y	R.LFQTAFPAPYGPSphosPASR.Y	-2.05586	1.6483	5	2	sp|Q9Y6J9|TAF6L_HUMAN	STYX	Q1	1	1	0.986	0.985	RGRLFQTAFPAPYGPSPASRYVQKLPMIGRT
sp|O95155|UBE4B_HUMAN_86 87 88_C	R.SQSSEGVSSL(SSS)phosPSNSLETQSQSLSR.S	R.SQSSEGVSSL(SSS)phosPSNSLETQSQSLSR.S	-2.05586	-0.554332	3	2	sp|O95155|UBE4B_HUMAN	STYX	Q4	0.9968	0.9918	0.999	0.998	GVAHRSQSSEGVSSLSSSPSNSLETQSQSLS VAHRSQSSEGVSSLSSSPSNSLETQSQSLSR AHRSQSSEGVSSLSSSPSNSLETQSQSLSRS
sp|Q8NEV8|EXPH5_HUMAN_1162	R.IISphosPVESDSSVR.D	R.IISphosPVESDSSVR.D	-2.05586	0.476345	1	1	sp|Q8NEV8|EXPH5_HUMAN	STYX	NR	0.9995	0.9998	0.998	0.998	MDASELTPRAWERIISPVESDSSVRDCSLTK
sp|Q9Y618|NCOR2_HUMAN_946	R.PSLLTphosPTGDPR.A	R.PSLLTphosPTGDPR.A	-2.05586	0.0613077	1	1	sp|Q9Y618|NCOR2_HUMAN	STYX	NR	0.9295	0.9741	0.574	0.988	GGDKNRLLSPRPSLLTPTGDPRANASPQKPL
sp|Q96RK0|CIC_HUMAN_1381 1382_C	R.FAELPEFRPEEVLPSPTLQSLA(TS)phosPR.A	R.FAELPEFRPEEVLPSPTLQSLA(TS)phosPR.A	-2.04404	0.46164	2	2	sp|Q96RK0|CIC_HUMAN	STYX	NR	0.9945	0.9989	0.656	0.952	RPEEVLPSPTLQSLATSPRAILGSYRKKRKN PEEVLPSPTLQSLATSPRAILGSYRKKRKNS
sp|Q9Y4H2|IRS2_HUMAN_973	R.QRSphosPLSDYMNLDFSSPK.S	R.QRSphosPLSDYMNLDFSSPK.S	-2.03433	-0.875127	2	5	sp|Q9Y4H2|IRS2_HUMAN	STYX	Q4	0.9997	1	0.996	0.997	LGSGTPGTSSDSRQRSPLSDYMNLDFSSPKS
sp|Q9UHD8|SEPT9_HUMAN_22 23_C	R.LGD(SS)phosGPALK.R	R.RLGD(SS)phosGPALKR.S	-2.02666	-0.178519	2	1	sp|Q9UHD8|SEPT9_HUMAN	STYX	NR	0.9974	0.9999	1	1	GGTRTSSGRLRRLGDSSGPALKRSFEVEEVE GTRTSSGRLRRLGDSSGPALKRSFEVEEVET
sp|Q9BY44|EIF2A_HUMAN_526	R.NTVSQSphosISGDPEIDKK.L	R.NTVSQSphosISGDPEIDKK.L	-2.02285	0.106082	2	6	sp|Q9BY44|EIF2A_HUMAN	STYX	NR	1	1	0.991	0.992	PTPAPQSTPRNTVSQSISGDPEIDKKIKNLK
sp|P33176|KINH_HUMAN_933	K.PIRPGQHPAASphosPTHPSAIR.G	R.PGQHPAASphosPTHPSAIR.G	-2.01342	0.112164	2	12	sp|P33176|KINH_HUMAN	STYX	NR	0.9992	1	0.996	0.996	AQIAKPIRPGQHPAASPTHPSAIRGGGAFVQ
sp|P51610|HCFC1_HUMAN_1205	R.SphosPAFVQLAPLSSK.V	R.SphosPAFVQLAPLSSK.V	-2.0128	0.932228	9	5	sp|P51610|HCFC1_HUMAN	STYX	Q1	1	0.9996	0.998	0.998	GPLLGPSMAREPGGRSPAFVQLAPLSSKVRL
sp|Q9NYF8|BCLF1_HUMAN_183	K.SphosQEEPKDTFEHDPSESIDEFNK.S	K.SKSphosQEEPKDTFEHDPSESIDEFNK.S	-2.0128	2.87237	20	11	sp|Q9NYF8|BCLF1_HUMAN	STYQ	Q1	1	1	0.996	0.998	KAEGEPQEESPLKSKSQEEPKDTFEHDPSES
sp|O43318|M3K7_HUMAN_375	R.GSSphosVESLPPTSEGK.R	R.GSSphosVESLPPTSEGK.R	-2.0128	0.137257	1	27	sp|O43318|M3K7_HUMAN	STYX	NR	0.9966	1	0.936	0.993	QSESGRLSLGASRGSSVESLPPTSEGKRMSA
sp|Q86YV5|PRAG1_HUMAN_826	R.AASphosSPDGFFWTQGSPKPGTASPK.L	R.AASphosSPDGFFWTQGSPK.P	-2.0128	0.106082	1	2	sp|Q86YV5|PRAG1_HUMAN	STYX	NR	1	1	0.913	0.946	QPPPLPQKKIVSRAASSPDGFFWTQGSPKPG
tr|G1UD79|G1UD79_HUMAN_62 63 64_C	R.HSLLL(SSS)phosPNRIPSSR.L	R.HSLLL(SSS)phosPNR.L	-2.0103	0.179669	2	16	tr|G1UD79|G1UD79_HUMAN	STYX	NR	0.9965	1	0.999	0.999	RRNSTTIMSRHSLLLSSSPNRIPSSRLHQIK RNSTTIMSRHSLLLSSSPNRIPSSRLHQIKR NSTTIMSRHSLLLSSSPNRIPSSRLHQIKRE
sp|P53814|SMTN_HUMAN_357	R.LQDGTPQAALSphosPLTPAR.L	R.LQDGTPQAALSphosPLTPAR.L	-1.99553	-0.677377	2	4	sp|P53814|SMTN_HUMAN	STYX	Q4	1	1	0.995	0.996	PMAARLQDGTPQAALSPLTPARLLGPSLTST
sp|Q16625|OCLN_HUMAN_357 358_C	K.STPVPEVVQELPL(TS)phosPVDDFRQPR.Y	K.STPVPEVVQELPL(TS)phosPVDDFRQPR.Y	-1.98585	-0.0326684	4	3	sp|Q16625|OCLN_HUMAN	STYX	NR	0.9998	0.9999	0.994	0.996	YKSTPVPEVVQELPLTSPVDDFRQPRYSSGG KSTPVPEVVQELPLTSPVDDFRQPRYSSGGN
sp|Q01970|PLCB3_HUMAN_270	R.LNEVLYPPLRPSphosQAR.L	R.LNEVLYPPLRPSphosQAR.L	-1.97098	-0.133195	5	7	sp|Q01970|PLCB3_HUMAN	STYQ	NR	1	1	0.997	0.997	RDPRLNEVLYPPLRPSQARLLIEKYEPNQQF
sp|Q14789|GOGB1_HUMAN_2870 2871 2872_C	R.SAAQP(STS)phosPAEVQSLKK.A	R.SAAQP(STS)phosPAEVQSLK.K	-1.97098	-0.411293	1	8	sp|Q14789|GOGB1_HUMAN	STYX	NR	0.9998	0.9999	0.999	0.999	FRKSEEGKQRSAAQPSTSPAEVQSLKKAMSS RKSEEGKQRSAAQPSTSPAEVQSLKKAMSSL KSEEGKQRSAAQPSTSPAEVQSLKKAMSSLQ
sp|Q86VE0|MYPOP_HUMAN_176 177 178_C	K.AG(SSS)phosPEPWARPSCTPQEGGCPRPK.E	K.AG(SSS)phosPEPWAR.P	-1.97098	0.244172	3	1	sp|Q86VE0|MYPOP_HUMAN	STYX	NR	0.9789	0.9749	0.999	1	REDRRADTSAHSKAGSSSPEPWARPSCTPQE EDRRADTSAHSKAGSSSPEPWARPSCTPQEG DRRADTSAHSKAGSSSPEPWARPSCTPQEGG
sp|Q9UMZ2|SYNRG_HUMAN_1075 1082	R.SLSphosLGDKEISphosRSSPSPALEQPFR.D	R.SLSphosLGDKEISphosRSSPSPALEQPFR.D	-1.97098	-0.306843	1	1	sp|Q9UMZ2|SYNRG_HUMAN	STYX	NR	0.9781	0.9144	0.867	0.864	ATFDLSVQGSHKRSLSLGDKEISRSSPSPAL QGSHKRSLSLGDKEISRSSPSPALEQPFRDR
sp|Q69YN4|VIR_HUMAN_1579	R.SFLSEPSSphosPGRTK.T	R.SFLSEPSSphosPGR.T	-1.94438	-0.163253	2	1	sp|Q69YN4|VIR_HUMAN	STYX	NR	0.9965	0.9999	0.959	0.913	DLHSELERSFLSEPSSPGRTKTTKGFKLGKH
sp|Q12888|TP53B_HUMAN_124	R.TSSVLGMSphosVESAPAVEEEKGEELEQK.E	R.TSSVLGMSphosVESAPAVEEEKGEELEQK.E	-1.9348	1.17978	2	3	sp|Q12888|TP53B_HUMAN	STYX	Q1	0.9939	0.9931	0.993	0.982	EQLPQPNRTSSVLGMSVESAPAVEEEKGEEL
sp|O95049|ZO3_HUMAN_339	R.RESSphosVDSR.T	R.RESSphosVDSR.T	-1.93089	0.495711	4	3	sp|O95049|ZO3_HUMAN	STYX	Q1	0.9926	0.9869	0.98	0.978	QTDSPVESPRLRRESSVDSRTISEPDEQRSE
sp|Q14191|WRN_HUMAN_1133	K.SIMVQSphosPEK.A	K.SIMVQSphosPEK.A	-1.93033	-0.148146	3	5	sp|Q14191|WRN_HUMAN	STYX	NR	0.9984	1	0.997	0.998	ISSGSNISKKSIMVQSPEKAYSSSQPVISAQ
sp|Q8NDI1|EHBP1_HUMAN_426 427 428_C	K.DL(STS)phosPKPSPIPSPVLGR.K	K.DL(STS)phosPKPSPIPSPVLGR.K	-1.93033	0.0546615	1	8	sp|Q8NDI1|EHBP1_HUMAN	STYX	NR	0.9987	1	0.993	0.999	TGVLNENTVSAGKDLSTSPKPSPIPSPVLGR GVLNENTVSAGKDLSTSPKPSPIPSPVLGRK VLNENTVSAGKDLSTSPKPSPIPSPVLGRKP
sp|Q8WYP5|ELYS_HUMAN_995	R.NSphosILDQYGK.L	R.NSphosILDQYGK.L	-1.93033	-0.0257655	1	2	sp|Q8WYP5|ELYS_HUMAN	STYX	NR	0.9952	0.9997	0.676	0.998	NDRDPRLRERSLARNSILDQYGKILPRVHRK
sp|Q9NS91|RAD18_HUMAN_142	R.EMSphosGSTSELLIK.E	R.EMSphosGSTSELLIK.E	-1.91057	0.221088	4	1	sp|Q9NS91|RAD18_HUMAN	STYX	NR	0.9998	0.9999	0.99	0.99	KQGSRLMDNFLIREMSGSTSELLIKENKSKF
sp|P09012|SNRPA_HUMAN_115	K.SphosQETPATK.K	K.SphosQETPATK.K	-1.90517	2.31404	2	2	sp|P09012|SNRPA_HUMAN	STYQ	Q1	0.9957	0.9976	0.99	0.977	TFVERDRKREKRKPKSQETPATKKAVQGGGA
sp|Q12888|TP53B_HUMAN_117 118 119_C	R.(TSS)phosVLGMSVESAPAVEEEKGEELEQK.E	R.(TSS)phosVLGMSVESAPAVEEEKGEELEQK.E	-1.89292	1.1949	8	6	sp|Q12888|TP53B_HUMAN	STYX	Q1	0.9954	0.9939	0.999	0.999	GSISQVIEQLPQPNRTSSVLGMSVESAPAVE SISQVIEQLPQPNRTSSVLGMSVESAPAVEE ISQVIEQLPQPNRTSSVLGMSVESAPAVEEE
sp|P24928|RPB1_HUMAN_1877 1878 1880 1881 1882_C	K.YSP(TS)phosP(TYS)phosPTTPK.Y	K.YSP(TS)phosP(TYS)phosPTTPK.Y	-1.8908	0.967332	1	7	sp|P24928|RPB1_HUMAN	STYX	Q1	0.9863	0.9976	1.142	1.256	PTSPKYSPTSPKYSPTSPTYSPTTPKYSPTS TSPKYSPTSPKYSPTSPTYSPTTPKYSPTSP PKYSPTSPKYSPTSPTYSPTTPKYSPTSPTY KYSPTSPKYSPTSPTYSPTTPKYSPTSPTYS YSPTSPKYSPTSPTYSPTTPKYSPTSPTYSP
sp|O95292|VAPB_HUMAN_146	K.IISTTASphosKTETPIVSK.S	K.IISTTASphosKTETPIVSK.S	-1.8908	-0.624584	1	2	sp|O95292|VAPB_HUMAN	STYX	Q4	0.9798	0.9921	0.926	0.993	KPHDVEINKIISTTASKTETPIVSKSLSSSL
sp|Q8N488|RYBP_HUMAN_127	K.SDILKDPPSEANSphosIQSANATTK.T	K.SDILKDPPSEANSphosIQSANATTK.T	-1.8908	-0.485181	3	7	sp|Q8N488|RYBP_HUMAN	STYX	Q4	0.9933	0.9946	0.996	0.997	KPKSDILKDPPSEANSIQSANATTKTSETNH
sp|P35568|IRS1_HUMAN_272 273 274_C	R.SKSQ(SSS)phosNCSNPISVPLR.R	K.SQ(SSS)phosNCSNPISVPLR.R	-1.8908	0.0482515	1	1	sp|P35568|IRS1_HUMAN	STYX	NR	0.9348	0.9913	0.723	0.6	MRAMSDEFRPRSKSQSSSNCSNPISVPLRRH RAMSDEFRPRSKSQSSSNCSNPISVPLRRHH AMSDEFRPRSKSQSSSNCSNPISVPLRRHHL
sp|Q13469|NFAC2_HUMAN_862	R.LSPGSYPTphosVIQQQNATSQR.A	R.LSPGSYPTphosVIQQQNATSQR.A	-1.8908	0.101722	1	2	sp|Q13469|NFAC2_HUMAN	STYX	NR	1	1	0.931	0.751	PPVSQGQRLSPGSYPTVIQQQNATSQRAAKN
sp|Q8ND04|SMG8_HUMAN_469	K.LYEVAIDGKEEDLGSphosPTGELTSK.L	K.LYEVAIDGKEEDLGSphosPTGELTSK.L	-1.8908	-0.290165	1	3	sp|Q8ND04|SMG8_HUMAN	STYX	NR	1	1	0.905	0.995	KLYEVAIDGKEEDLGSPTGELTSKILSSIKV
sp|Q9NYT0|PLEK2_HUMAN_116	K.VQQLHSphosLRNSFK.L	K.VQQLHSphosLRNSFK.L	-1.8908	-0.193949	1	5	sp|Q9NYT0|PLEK2_HUMAN	STYX	NR	0.9088	0.9988	0.5	0.5	GAIHAGQPGKVQQLHSLRNSFKLPPHISLHR
sp|Q9P206|K1522_HUMAN_862	R.ASphosPVPAPSSGLHAAVR.L	R.ASphosPVPAPSSGLHAAVR.L	-1.8908	-0.241255	1	13	sp|Q9P206|K1522_HUMAN	STYX	NR	0.9958	1	0.993	0.998	SAPQKPLRRALSGRASPVPAPSSGLHAAVRL
sp|Q9Y6Q9|NCOA3_HUMAN_836	K.QQVFQGTNSphosLGLK.S	K.QQVFQGTNSphosLGLK.S	-1.8908	-0.457014	1	2	sp|Q9Y6Q9|NCOA3_HUMAN	STYX	NR	0.9916	0.9998	0.94	0.955	GSHLGTKQQVFQGTNSLGLKSSQSVQSIRPP
sp|Q6PJT7|ZC3HE_HUMAN_390	R.TRTSphosQEELLAEVVQGQSR.T	R.TRTSphosQEELLAEVVQGQSR.T	-1.87723	0.910748	4	1	sp|Q6PJT7|ZC3HE_HUMAN	STYQ	Q1	1	1	0.991	0.987	VPQKQTLPVAPRTRTSQEELLAEVVQGQSRT
sp|Q96QE3|ATAD5_HUMAN_601 602 603_C	R.I(SST)phosPTTETIR.G	R.I(SST)phosPTTETIR.G	-1.87465	-2.41118	2	1	sp|Q96QE3|ATAD5_HUMAN	STYX	Q4	0.9955	0.9835	0.997	0.998	LNVSTPKSTRRSGRISSTPTTETIRGIDSDD NVSTPKSTRRSGRISSTPTTETIRGIDSDDV VSTPKSTRRSGRISSTPTTETIRGIDSDDVQ
sp|Q08999|RBL2_HUMAN_1068	K.NETMLSphosPR.E	K.NETMLSphosPR.E	-1.87259	0.726323	2	1	sp|Q08999|RBL2_HUMAN	STYX	Q1	0.9996	0.9998	0.992	0.993	NHPVYISPHKNETMLSPREKIFYYFSNSPSK
sp|Q6WKZ4|RFIP1_HUMAN_280 281_C	R.TA(ST)phosDLK.Q	K.RTA(ST)phosDLK.Q	-1.87259	-0.393258	2	3	sp|Q6WKZ4|RFIP1_HUMAN	STYX	NR	0.9597	0.9833	0.997	0.893	ESSSASDVMSHKRTASTDLKQLNQVNFTLPK SSSASDVMSHKRTASTDLKQLNQVNFTLPKK
sp|Q6P3S6|FBX42_HUMAN_488	R.RGSphosLPDQK.D	R.RGSphosLPDQK.D	-1.87157	-1.36406	4	2	sp|Q6P3S6|FBX42_HUMAN	STYX	Q4	0.9672	0.9993	1	1	GYDLKIGLSLAPRRGSLPDQKDLRLGSIDLN
sp|Q9P265|DIP2B_HUMAN_258 259_C	R.(SS)phosLMDTADGVPVSSR.V	R.(SS)phosLMDTADGVPVSSR.V	-1.87157	0.250505	2	6	sp|Q9P265|DIP2B_HUMAN	STYX	NR	1	1	0.987	1	PPSGIVKGMHKGSNRSSLMDTADGVPVSSRV PSGIVKGMHKGSNRSSLMDTADGVPVSSRVS
sp|Q9BXW9|FACD2_HUMAN_717	K.DGGPVTSphosQESGQK.L	K.DGGPVTSphosQESGQK.L	-1.85233	2.30855	3	3	sp|Q9BXW9|FACD2_HUMAN	STYQ	Q1	1	1	0.991	0.992	LLFSQDFAKDGGPVTSQESGQKLVSPLCLAP
sp|Q5T1M5|FKB15_HUMAN_619	R.NNSphosLQTATENTQAR.V	R.NNSphosLQTATENTQAR.V	-1.85233	-0.573272	3	6	sp|Q5T1M5|FKB15_HUMAN	STYX	Q4	1	1	0.997	0.998	RYVEQSNLMMEKRNNSLQTATENTQARVLHA
sp|O43719|HTSF1_HUMAN_642	K.VFDDESphosDEKEDEEYADEKGLEAA.D	K.VFDDESphosDEKEDEEYADEK.G	-1.85233	0.137257	16	42	sp|O43719|HTSF1_HUMAN	STYX	NR	1	1	0.999	0.999	KEEEEDTYEKVFDDESDEKEDEEYADEKGLE
sp|P49756|RBM25_HUMAN_703	K.LPVDSVFNKFEDEDSphosDDVPR.K	K.FEDEDSphosDDVPR.K	-1.85233	-0.241255	5	1	sp|P49756|RBM25_HUMAN	STYX	NR	1	0.9998	0.99	1	KLPVDSVFNKFEDEDSDDVPRKRKLVPLDYG
sp|Q66K74|MAP1S_HUMAN_741	R.SASPHDVDLCLVSphosPCEFEHR.K	R.SASPHDVDLCLVSphosPCEFEHRK.A	-1.85233	-0.209546	1	2	sp|Q66K74|MAP1S_HUMAN	STYX	NR	0.9998	1	0.992	0.998	ARRSASPHDVDLCLVSPCEFEHRKAVPMAPA
sp|Q6N043|Z280D_HUMAN_179 180 181_C	K.RP(STS)phosEVNNVNPK.K	K.RP(STS)phosEVNNVNPK.K	-1.85233	0.255532	1	6	sp|Q6N043|Z280D_HUMAN	STYX	NR	1	1	1	1	SMAGMSESSFLSKRPSTSEVNNVNPKKPKPS MAGMSESSFLSKRPSTSEVNNVNPKKPKPSE AGMSESSFLSKRPSTSEVNNVNPKKPKPSES
sp|Q8NHW3|MAFA_HUMAN_336	R.GGPGSAGGAGFPREPSphosPPQAGPGGAK.G	R.GGPGSAGGAGFPREPSphosPPQAGPGGAK.G	-1.85233	-0.273677	1	3	sp|Q8NHW3|MAFA_HUMAN	STYX	NR	0.9845	1	0.711	0.936	GGPGSAGGAGFPREPSPPQAGPGGAKGTADF
sp|Q8WYQ5|DGCR8_HUMAN_153	R.AECGLLLSphosPVSGDVHACPFGGSVGDGVGIGGESADKK.D	R.AECGLLLSphosPVSGDVHACPFGGSVGDGVGIGGESADKKDEENELDQEK.R	-1.85233	0.375416	3	1	sp|Q8WYQ5|DGCR8_HUMAN	STYX	NR	1	1	0.972	0.975	TGAERDVRAECGLLLSPVSGDVHACPFGGSV
sp|Q3YEC7|RABL6_HUMAN_402	R.SphosFLEDTTPARDEK.K	R.SphosFLEDTTPAR.D	-1.84636	-0.254739	2	4	sp|Q3YEC7|RABL6_HUMAN	STYX	NR	0.9998	0.9999	0.984	0.995	VQSVEDFVPDDRLDRSFLEDTTPARDEKKVG
sp|O14686|KMT2D_HUMAN_4738	R.ALSphosPVIPLIPR.A	R.ALSphosPVIPLIPR.A	-1.83946	-0.543284	28	20	sp|O14686|KMT2D_HUMAN	STYX	Q4	0.9999	0.9998	1	1	PHLGSGRWEQEDRALSPVIPLIPRASIPVFP
sp|Q8NFC6|BD1L1_HUMAN_1281	K.NTAAEEHVAQGDATLEHSTNLDSSphosPSLSSVTVVPLR.E	K.NTAAEEHVAQGDATLEHSTNLDSSphosPSLSSVTVVPLR.E	-1.82681	-0.784185	2	2	sp|Q8NFC6|BD1L1_HUMAN	STYX	Q4	0.9867	0.99	0.985	0.98	AQGDATLEHSTNLDSSPSLSSVTVVPLRESY
sp|Q9UQE7|SMC3_HUMAN_787	K.AELGTDLLSphosQLSLEDQKR.V	K.AELGTDLLSphosQLSLEDQKR.V	-1.81486	3.56246	1	2	sp|Q9UQE7|SMC3_HUMAN	STYQ	Q1	0.9989	1	0.993	0.973	STRESLKAELGTDLLSQLSLEDQKRVDALND
sp|Q6WKZ4|RFIP1_HUMAN_545	R.LEVSphosPEAQPTAR.L	R.LEVSphosPEAQPTAR.L	-1.81486	-0.257375	3	5	sp|Q6WKZ4|RFIP1_HUMAN	STYX	NR	0.9992	0.9999	0.998	0.998	PRAPQTRAVKPRLEVSPEAQPTARLPSPTDS
sp|Q9NYB0|TE2IP_HUMAN_43 44_C	R.RL(ST)phosLILHGGGTVCR.V	R.RL(ST)phosLILHGGGTVCR.V	-1.81486	-0.00518771	1	3	sp|Q9NYB0|TE2IP_HUMAN	STYX	NR	1	1	1	1	SMSFYVRPSPAKRRLSTLILHGGGTVCRVQE MSFYVRPSPAKRRLSTLILHGGGTVCRVQEP
sp|Q15149|PLEC_HUMAN_2039	R.KASphosDSELER.Q	R.KASphosDSELER.Q	-1.8059	-0.125949	4	6	sp|Q15149|PLEC_HUMAN	STYX	NR	0.9889	0.9999	0.986	0.992	HKADIEERLAQLRKASDSELERQKGLVEDTL
sp|Q86WB0|NIPA_HUMAN_329	R.SphosQDATFSPGSEQAEK.S	R.SphosQDATFSPGSEQAEK.S	-1.79752	1.96894	2	4	sp|Q86WB0|NIPA_HUMAN	STYQ	Q1	0.9996	1	0.955	0.997	RLPLVPESPRRMMTRSQDATFSPGSEQAEKS
sp|Q6P1X5|TAF2_HUMAN_22	K.GFESphosPRPYK.L	K.GFESphosPRPYK.L	-1.79659	-3.25022	2	2	sp|Q6P1X5|TAF2_HUMAN	STYX	Q4	0.9987	0.9998	0.994	0.996	EPARMNRKKGDKGFESPRPYKLTHQVVCINN
sp|Q9Y2W1|TR150_HUMAN_939	K.FSGEEGEIEDDESphosGTENREEK.D	K.FSGEEGEIEDDESphosGTENR.E	-1.79659	0.159873	4	2	sp|Q9Y2W1|TR150_HUMAN	STYX	NR	0.9998	1	0.992	0.99	HDKFSGEEGEIEDDESGTENREEKDNIQPTT
tr|A0A2U3U043|A0A2U3U043_HUMAN_590	R.STNSphosPTIVSPAIVSPTQDSRPNMSRPLITR.S	R.STNSphosPTIVSPAIVSPTQDSRPNMSRPLITR.S	-1.7874	-0.778912	2	3	tr|A0A2U3U043|A0A2U3U043_HUMAN	STYX	Q4	0.9998	0.9999	0.962	0.87	PLPLLPEANGHRSTNSPTIVSPAIVSPTQDS
sp|P42695|CNDD3_HUMAN_1309	A.LCLETVPVPAGQENPAMSphosPAVSQPCTPR.A	L.CLETVPVPAGQENPAMSphosPAVSQPCTPR.A	-1.77878	1.14341	2	2	sp|P42695|CNDD3_HUMAN	STYX	Q1	0.9981	1	0.982	0.988	LETVPVPAGQENPAMSPAVSQPCTPRASAGH
sp|Q6PJT7|ZC3HE_HUMAN_389 390_C	R.TR(TS)phosQEELLAEVVQGQSR.T	R.TR(TS)phosQEELLAEVVQGQSR.T	-1.77878	0.68472	2	4	sp|Q6PJT7|ZC3HE_HUMAN	STYQ	Q1	1	1	0.996	0.984	TVPQKQTLPVAPRTRTSQEELLAEVVQGQSR VPQKQTLPVAPRTRTSQEELLAEVVQGQSRT
sp|O75179|ANR17_HUMAN_2065	R.NSPLDCGSphosASPNK.V	R.NSPLDCGSphosASPNK.V	-1.77878	-0.155699	2	2	sp|O75179|ANR17_HUMAN	STYX	NR	0.9979	1	0.785	0.689	AQPGGVSRNSPLDCGSASPNKVASSSEQEAG
sp|P36551|HEM6_HUMAN_111 112_C	R.A(TS)phosLGRPEEEEDELAHR.C	R.A(TS)phosLGRPEEEEDELAHR.C	-1.77833	0.505297	1	2	sp|P36551|HEM6_HUMAN	STYX	Q1	0.9988	0.9999	1	1	VQRAEMLPKTSGTRATSLGRPEEEEDELAHR QRAEMLPKTSGTRATSLGRPEEEEDELAHRC
sp|O43166|SI1L1_HUMAN_1365 1366 1367_C	K.VAPLWH(SSS)phosEVISMADR.T	K.VAPLWH(SSS)phosEVISMADR.T	-1.77833	-0.71074	3	1	sp|O43166|SI1L1_HUMAN	STYX	Q4	0.9997	1	0.999	1	PRSGPGKEKVAPLWHSSSEVISMADRTLETE RSGPGKEKVAPLWHSSSEVISMADRTLETES SGPGKEKVAPLWHSSSEVISMADRTLETESH
sp|Q562F6|SGO2_HUMAN_843	K.GVHDLEKDNFFSphosLTPK.D	K.GVHDLEKDNFFSphosLTPK.D	-1.77833	-0.245722	1	2	sp|Q562F6|SGO2_HUMAN	STYX	NR	0.9438	0.9998	0.5	0.5	NDNKGVHDLEKDNFFSLTPKDKETISENLQV
sp|Q96JY6|PDLI2_HUMAN_206	R.SSRPSphosMDSEGGSLLLDEDSEVFK.M	R.SSRPSphosMDSEGGSLLLDEDSEVFK.M	-1.77833	0.124873	5	7	sp|Q96JY6|PDLI2_HUMAN	STYX	NR	0.9992	0.9997	0.991	0.984	VLVLPPSPGPRSSRPSMDSEGGSLLLDEDSE
sp|Q9BYW2|SETD2_HUMAN_676	R.SFCPIELNINGSphosPGAESDLATFCTSK.T	R.SFCPIELNINGSphosPGAESDLATFCTSK.T	-1.77833	0.0742468	1	1	sp|Q9BYW2|SETD2_HUMAN	STYX	NR	0.9998	0.9972	0.997	0.997	DQLRSFCPIELNINGSPGAESDLATFCTSKT
sp|Q9NV70|EXOC1_HUMAN_489 490 491_C	R.SQ(SSS)phosLLDMGNMSASDLDVADR.T	R.SQ(SSS)phosLLDMGNMSASDLDVADR.T	-1.77473	1.31674	2	1	sp|Q9NV70|EXOC1_HUMAN	STYX	Q1	0.9961	0.9939	0.958	0.569	LNKLSVQSSGNRRSQSSSLLDMGNMSASDLD NKLSVQSSGNRRSQSSSLLDMGNMSASDLDV KLSVQSSGNRRSQSSSLLDMGNMSASDLDVA
sp|Q96G25|MED8_HUMAN_82	R.NQVIIPLVLSphosPDRDEDLMR.Q	R.NQVIIPLVLSphosPDRDEDLMR.Q	-1.76582	-2.41118	8	1	sp|Q96G25|MED8_HUMAN	STYX	Q4	1	0.9986	1	1	KTPLFRNQVIIPLVLSPDRDEDLMRQTEGRV
sp|O95863|SNAI1_HUMAN_92	R.VAELTSLSphosDEDSGK.G	R.VAELTSLSphosDEDSGK.G	-1.7614	2.092	4	2	sp|O95863|SNAI1_HUMAN	STYX	Q1	1	0.9998	0.995	0.989	LRLQESPRVAELTSLSDEDSGKGSQPPSPPS
sp|P21127|CD11B_HUMAN_751 752	K.RGTphosSphosPRPPEGGLGYSQLGDDDLK.E	K.RGTphosSphosPRPPEGGLGYSQLGDDDLK.E	-1.75701	-0.163253	2	6	sp|P21127|CD11B_HUMAN	STYX	NR	0.9999	1	0.997	0.998	PTWPAKSEQQRVKRGTSPRPPEGGLGYSQLG TWPAKSEQQRVKRGTSPRPPEGGLGYSQLGD
sp|Q12888|TP53B_HUMAN_580	K.FVPAENDSILMNPAQDGEVQLSphosQNDDK.T	K.FVPAENDSILMNPAQDGEVQLSphosQNDDKTK.G	-1.74658	2.28648	16	27	sp|Q12888|TP53B_HUMAN	STYQ	Q1	1	1	0.99	0.997	DSILMNPAQDGEVQLSQNDDKTKGDDTDTRD
sp|O60381|HBP1_HUMAN_380	R.RASphosLSCGGPGGQDFAR.S	R.RASphosLSCGGPGGQDFAR.S	-1.74271	0.559197	1	2	sp|O60381|HBP1_HUMAN	STYX	Q1	0.9988	1	0.918	0.922	SAVYVLSSMARQRRASLSCGGPGGQDFARSG
sp|O95602|RPA1_HUMAN_359 360_C	L.MAQEQKLPEEVATP(TT)phosDEEKDSLIAIDR.S	K.LPEEVATP(TT)phosDEEKDSLIAIDR.S	-1.74271	0.649483	1	2	sp|O95602|RPA1_HUMAN	STYX	Q1	0.9974	0.9999	0.852	0.927	LMAQEQKLPEEVATPTTDEEKDSLIAIDRSF MAQEQKLPEEVATPTTDEEKDSLIAIDRSFL
sp|P52272|HNRPM_HUMAN_452	R.MGSphosGIER.M	R.MGSphosGIER.M	-1.74271	1.52493	6	2	sp|P52272|HNRPM_HUMAN	STYX	Q1	0.9969	0.9994	1	1	MGLVMDRMGSVERMGSGIERMGPLGLDHMAS
sp|O95197|RTN3_HUMAN_575	K.NFEELVSDSELHQDQPDILGRSphosPASEAACSK.V	K.NFEELVSDSELHQDQPDILGRSphosPASEAACSK.V	-1.74271	-1.08925	1	1	sp|O95197|RTN3_HUMAN	STYX	Q4	0.9614	0.9973	0.885	0.989	SDSELHQDQPDILGRSPASEAACSKVPDTNV
sp|O95900|TRUB2_HUMAN_299	K.SLSphosPGLDTK.Q	K.SLSphosPGLDTK.Q	-1.74271	0.149535	2	1	sp|O95900|TRUB2_HUMAN	STYX	NR	0.9989	0.9902	0.992	0.992	RAATPQVAAELEKSLSPGLDTKQLPSPGWSW
sp|P53567|CEBPG_HUMAN_56	K.KSSphosPMDR.N	K.KSSphosPMDR.N	-1.74271	-0.290165	1	1	sp|P53567|CEBPG_HUMAN	STYX	NR	0.9822	0.9818	0.931	0.909	GGGKAVAPSKQSKKSSPMDRNSDEYRQRRER
sp|Q5VUA4|ZN318_HUMAN_1267	K.KESphosPTSSSFGK.F	K.KESphosPTSSSFGK.F	-1.74271	-0.103752	1	7	sp|Q5VUA4|ZN318_HUMAN	STYX	NR	0.9961	0.9999	0.996	0.995	NTGIKLQLKEEVKKESPTSSSFGKFSWKKPE
sp|Q96T23|RSF1_HUMAN_1359 1375	K.VGSphosPLDYSLVDLPSTNGQSphosPGK.A	K.VGSphosPLDYSLVDLPSTNGQSphosPGK.A	-1.74271	-0.133195	7	3	sp|Q96T23|RSF1_HUMAN	STYX	NR	0.9977	0.997	0.995	0.991	ESDEEEDFENVGKVGSPLDYSLVDLPSTNGQ PLDYSLVDLPSTNGQSPGKAIENLIGKPTEK
sp|Q9H869|YYAP1_HUMAN_724	K.VEHSphosPGPPPVDK.Q	K.VEHSphosPGPPPVDK.Q	-1.74271	-0.398887	5	4	sp|Q9H869|YYAP1_HUMAN	STYX	NR	1	0.9998	1	1	ELSPLSATVFPKVEHSPGPPPVDKQCQEGLS
sp|Q9H8T0|AKTIP_HUMAN_29 30_C	K.TLTGDVK(TS)phosPPR.T	K.TLTGDVK(TS)phosPPR.T	-1.74271	-0.0820743	5	14	sp|Q9H8T0|AKTIP_HUMAN	STYX	NR	0.9965	1	1	1	KRSEGEEKTLTGDVKTSPPRTAPKKQLPSIP RSEGEEKTLTGDVKTSPPRTAPKKQLPSIPK
sp|Q9C0D5|TANC1_HUMAN_313	R.PNSphosVAATSSTK.L	R.PNSphosVAATSSTK.L	-1.72826	0.00678197	8	2	sp|Q9C0D5|TANC1_HUMAN	STYX	NR	1	0.9876	0.998	0.997	PYSQGSSSLIMPRPNSVAATSSTKLEDLSYL
sp|Q9NYA4|MTMR4_HUMAN_1002	K.QVSSTKPVPLNCPSphosPVPPLYLDDDGLPFPTDVIQHR.L	L.NCPSphosPVPPLYLDDDGLPFPTDVIQHR.L	-1.72784	0.149535	2	1	sp|Q9NYA4|MTMR4_HUMAN	STYX	NR	0.9832	1	0.985	0.984	PKQVSSTKPVPLNCPSPVPPLYLDDDGLPFP
sp|Q14814|MEF2D_HUMAN_121	R.RASphosEELDGLFR.R	R.RASphosEELDGLFR.R	-1.72532	0.505297	12	18	sp|Q14814|MEF2D_HUMAN	STYX	Q1	1	1	1	1	SLEQSPLLEDKYRRASEELDGLFRRYGSTVP
sp|P13639|EF2_HUMAN_59	R.FTDTphosRKDEQER.C	R.FTDTphosRKDEQER.C	-1.72532	-0.193949	4	2	sp|P13639|EF2_HUMAN	STYX	NR	0.9984	0.9999	0.916	0.883	GIIASARAGETRFTDTRKDEQERCITIKSTA
sp|Q9ULH1|ASAP1_HUMAN_10	R.LSSphosFSSR.D	R.LSSphosFSSR.D	-1.72532	-0.193949	2	1	sp|Q9ULH1|ASAP1_HUMAN	STYX	NR	0.9973	0.9324	0.987	0.986	______MRSSASRLSSFSSRDSLWNRMPDQI
sp|P35613|BASI_HUMAN_362	R.KPEDVLDDDDAGSphosAPLK.S	R.RKPEDVLDDDDAGSphosAPLK.S	-1.72407	0.0742468	4	10	sp|P35613|BASI_HUMAN	STYX	NR	1	1	1	1	KRRKPEDVLDDDDAGSAPLKSSGQHQNDKGK
sp|Q5T8P6|RBM26_HUMAN_518	R.TNSphosPGFQK.K	R.TNSphosPGFQK.K	-1.72281	-0.504418	4	6	sp|Q5T8P6|RBM26_HUMAN	STYX	Q4	0.9849	0.9973	0.994	0.984	TKKTWFDKPNFNRTNSPGFQKKVQFGNENTK
sp|O95405|ZFYV9_HUMAN_306	R.TDLGSphosPNSFSHMSEGILMK.K	R.TDLGSphosPNSFSHMSEGILMK.K	-1.70794	0.734497	3	5	sp|O95405|ZFYV9_HUMAN	STYX	Q1	1	1	0.997	0.997	EDLTGKISSPRTDLGSPNSFSHMSEGILMKK
sp|Q01780|EXOSX_HUMAN_868	K.SMSphosFPTGK.S	K.SMSphosFPTGK.S	-1.70794	2.07021	3	2	sp|Q01780|EXOSX_HUMAN	STYX	Q1	0.9993	0.9997	0.996	0.995	IAAKKIKQSVGNKSMSFPTGKSDRGFRYNWP
sp|Q12888|TP53B_HUMAN_993	K.LVSphosPETEASEESLQFNLEKPATGER.K	K.LVSphosPETEASEESLQFNLEKPATGER.K	-1.70794	0.693132	7	6	sp|Q12888|TP53B_HUMAN	STYX	Q1	1	1	0.998	0.998	APDVDDKLCLRMKLVSPETEASEESLQFNLE
sp|Q13085|ACACA_HUMAN_78	R.SSphosMSGLHLVK.Q	R.SSphosMSGLHLVK.Q	-1.70794	0.874222	1	3	sp|Q13085|ACACA_HUMAN	STYX	Q1	1	1	0.942	0.933	GISSLQDGLALHIRSSMSGLHLVKQGRDRKK
sp|Q7Z7G8|VP13B_HUMAN_1815	R.IVQIEQHSGASphosQHR.L	R.IVQIEQHSGASphosQHR.L	-1.70794	0.58882	1	1	sp|Q7Z7G8|VP13B_HUMAN	STYQ	Q1	1	1	0.947	0.917	SVKIRIVQIEQHSGASQHRIARPSRQSSIVK
sp|Q92547|TOPB1_HUMAN_888	R.NAVALSASphosPQLK.E	R.NAVALSASphosPQLK.E	-1.70794	2.57501	2	4	sp|Q92547|TOPB1_HUMAN	STYX	Q1	1	1	0.97	0.97	LALANSSRNAVALSASPQLKEAQSEKEEAPK
sp|P46937|YAP1_HUMAN_119	R.QASTDAGTAGALTphosPQHVR.A	R.QASTDAGTAGALTphosPQHVR.A	-1.70794	-2.14315	4	8	sp|P46937|YAP1_HUMAN	STYX	Q4	1	1	0.998	0.998	HSRQASTDAGTAGALTPQHVRAHSSPASLQL
sp|Q96AE4|FUBP1_HUMAN_151	R.SCMLTphosGTPESVQSAKR.L	R.SCMLTphosGTPESVQSAKR.L	-1.70794	-0.925753	1	2	sp|Q96AE4|FUBP1_HUMAN	STYX	Q4	0.9997	0.9971	0.499	0.499	IAPDSGGLPERSCMLTGTPESVQSAKRLLDQ
sp|Q9H0U9|TSYL1_HUMAN_140	R.SphosASELTAGAEAEAEEVK.T	R.SphosASELTAGAEAEAEEVK.T	-1.70794	-0.875127	1	1	sp|Q9H0U9|TSYL1_HUMAN	STYX	Q4	0.9949	0.9956	0.583	0.741	VQGGEKALEICGAQRSASELTAGAEAEAEEV
tr|A0A2U3U043|A0A2U3U043_HUMAN_587 588_C	R.(ST)phosNSPTIVSPAIVSPTQDSRPNMSRPLITR.S	R.(ST)phosNSPTIVSPAIVSPTQDSRPNMSRPLITR.S	-1.70794	-0.434082	1	2	tr|A0A2U3U043|A0A2U3U043_HUMAN	STYX	Q4	0.9987	0.9997	0.45	0.66	KHDPLPLLPEANGHRSTNSPTIVSPAIVSPT HDPLPLLPEANGHRSTNSPTIVSPAIVSPTQ
sp|O15119|TBX3_HUMAN_432	R.LDKASphosPDSR.H	R.LDKASphosPDSR.H	-1.70794	0.197435	1	2	sp|O15119|TBX3_HUMAN	STYX	NR	0.982	0.9974	0.985	0.996	FAAERPRDSGRLDKASPDSRHSPATISSSTR
sp|O75400|PR40A_HUMAN_34	R.RLSphosGSSLCSGSWVSADGFLR.R	R.RLSphosGSSLCSGSWVSADGFLR.R	-1.70794	0.255577	7	7	sp|O75400|PR40A_HUMAN	STYX	NR	0.999	0.9989	0.994	0.986	SHPPSQGPGDGERRLSGSSLCSGSWVSADGF
sp|Q9C0G0|ZN407_HUMAN_993 994_C	K.EQI(SS)phosEPEDFAQPGDVYSQR.D	K.EQI(SS)phosEPEDFAQPGDVYSQR.D	-1.70794	-0.00518771	1	5	sp|Q9C0G0|ZN407_HUMAN	STYX	NR	0.9999	1	0.998	1	DGEVNSHLLDKKEQISSEPEDFAQPGDVYSQ GEVNSHLLDKKEQISSEPEDFAQPGDVYSQR
sp|Q9H3H1|MOD5_HUMAN_455	K.EKGSphosPGQNDQELK.C	K.EKGSphosPGQNDQELK.C	-1.70794	-0.0606828	1	4	sp|Q9H3H1|MOD5_HUMAN	STYX	NR	0.9965	1	1	1	QSVSPDHNKEPKEKGSPGQNDQELKCSV___
sp|Q9Y2W1|TR150_HUMAN_698	K.HGLAHDEMKSphosPR.E	K.HGLAHDEMKSphosPR.E	-1.70672	-0.225314	2	17	sp|Q9Y2W1|TR150_HUMAN	STYX	NR	1	1	1	1	PSTFRKHGLAHDEMKSPREPGYKAEGKYKDD
sp|Q7Z2Z1|TICRR_HUMAN_1413	R.SIVECQPDASATPGVGTADSphosPAAPTDSR.D	R.SIVECQPDASATPGVGTADSphosPAAPTDSR.D	-1.7059	-0.0188626	6	10	sp|Q7Z2Z1|TICRR_HUMAN	STYX	NR	0.9979	0.9997	0.991	0.995	CQPDASATPGVGTADSPAAPTDSRDDQKGLS
sp|Q8TDJ6|DMXL2_HUMAN_1400	R.TISphosVSGSTAK.E	R.TISphosVSGSTAK.E	-1.699	0.0514636	2	2	sp|Q8TDJ6|DMXL2_HUMAN	STYX	NR	0.9989	0.9992	0.953	0.943	PDAGEGTKRHLSRTISVSGSTAKETVTVGKD
sp|Q6PIW4|FIGL1_HUMAN_156 157_C	K.FSVCG(SS)phosQESDSLPNSAHDRDR.T	K.FSVCG(SS)phosQESDSLPNSAHDR.D	-1.69337	2.67772	2	2	sp|Q6PIW4|FIGL1_HUMAN	STYQ	Q1	0.9738	0.9957	0.994	0.998	KEATVFDLPKFSVCGSSQESDSLPNSAHDRD EATVFDLPKFSVCGSSQESDSLPNSAHDRDR
sp|P42166|LAP2A_HUMAN_67	K.GPPDFSSphosDEEREPTPVLGSGAAAAGR.S	K.GPPDFSSphosDEEREPTPVLGSGAAAAGR.S	-1.67438	-0.0194517	2	2	sp|P42166|LAP2A_HUMAN	STYX	NR	0.9994	1	0.987	0.93	PLPAGTNSKGPPDFSSDEEREPTPVLGSGAA
sp|P51812|KS6A3_HUMAN_715	R.NQSphosPVLEPVGR.S	R.NQSphosPVLEPVGR.S	-1.67438	-0.282109	2	4	sp|P51812|KS6A3_HUMAN	STYX	NR	0.9981	0.9999	1	1	KGAMAATYSALNRNQSPVLEPVGRSTLAQRR
sp|A6NDB9|PALM3_HUMAN_375	R.GDESphosPLGAEGAK.T	R.ERGDESphosPLGAEGAK.T	-1.67399	6.55075	5	5	sp|A6NDB9|PALM3_HUMAN	STYX	Q1	1	1	1	1	GLEGPEVAGRERGDESPLGAEGAKTGGGEET
sp|Q9UK61|TASOR_HUMAN_344	R.SNSphosFNTDR.N	R.SNSphosFNTDR.N	-1.67399	0.605394	3	4	sp|Q9UK61|TASOR_HUMAN	STYX	Q1	0.9974	0.9996	0.993	0.991	DDIQTPKFVPSSRSNSFNTDRNIDKYNYTLW
sp|P16144|ITB4_HUMAN_1483	R.VLSphosTSSTLTR.D	R.VLSphosTSSTLTR.D	-1.67399	-0.624584	3	1	sp|P16144|ITB4_HUMAN	STYX	Q4	0.9997	0.9999	0.993	0.992	AYGTHLSPHVPHRVLSTSSTLTRDYNSLTRS
sp|Q13541|4EBP1_HUMAN_96	R.DLPTIPGVTSPSSDEPPMEASQSphosHLRNSPEDK.R	R.DLPTIPGVTSPSSDEPPMEASQSphosHLRNSPEDK.R	-1.67399	-0.564437	1	2	sp|Q13541|4EBP1_HUMAN	STYX	Q4	0.9953	0.9998	0.649	0.915	VTSPSSDEPPMEASQSHLRNSPEDKRAGGEE
sp|Q9NS56|TOPRS_HUMAN_584 585_C	V.(YS)phosPYNHR.H	V.(YS)phosPYNHR.H	-1.67399	-0.850465	1	1	sp|Q9NS56|TOPRS_HUMAN	STYX	Q4	0.9406	0.9189	0.999	0.999	SSPRNLNSSVRGDRVYSPYNHRHRKRGRSRS SPRNLNSSVRGDRVYSPYNHRHRKRGRSRSS
sp|Q12802|AKP13_HUMAN_1929	K.FLSHSphosTDSLNK.L	K.FLSHSphosTDSLNK.L	-1.67399	0.137257	3	5	sp|Q12802|AKP13_HUMAN	STYX	NR	0.9999	1	0.943	0.972	GNDENMSNTWKFLSHSTDSLNKISKVNESTE
sp|Q76L83|ASXL2_HUMAN_842	K.APSPTGPALISphosGASPVHCAADGTVELK.A	K.APSPTGPALISphosGASPVHCAADGTVELK.A	-1.67399	-0.133272	3	4	sp|Q76L83|ASXL2_HUMAN	STYX	NR	0.9983	0.9988	0.925	0.988	CRQEKAPSPTGPALISGASPVHCAADGTVEL
sp|Q96EY4|TMA16_HUMAN_87	R.FSSphosELEQIELHNSIR.D	R.FSSphosELEQIELHNSIR.D	-1.67399	-0.241255	1	1	sp|Q96EY4|TMA16_HUMAN	STYX	NR	0.9999	0.9999	0.989	0.987	KDACELIERYLNRFSSELEQIELHNSIRDRQ
sp|Q9H4Z2|ZN335_HUMAN_1153	R.APTQTPTQTIILNSphosDDETLATLHTALQSSHGVLGPER.L	R.APTQTPTQTIILNSphosDDETLATLHTALQSSHGVLGPER.L	-1.67399	0.396175	3	3	sp|Q9H4Z2|ZN335_HUMAN	STYX	NR	0.9923	0.9928	0.99	0.998	ARAPTQTPTQTIILNSDDETLATLHTALQSS
sp|Q96LD4|TRI47_HUMAN_461	R.VLCPINYPLSphosPTR.F	R.VLCPINYPLSphosPTR.F	-1.66894	-0.583361	2	1	sp|Q96LD4|TRI47_HUMAN	STYX	Q4	0.9998	1	0.936	0.902	TKGVKRVLCPINYPLSPTRFTHCEQVLGEGA
sp|P62736|ACTA_HUMAN_234 235 236 237_C	E.MATAA(SSSS)phosLEK.S	E.MATAA(SSSS)phosLEK.S	-1.66162	-0.802371	2	1	sp|P62736|ACTA_HUMAN	STYX	Q4	0.9428	0.9901	0.999	0.998	CYVALDFENEMATAASSSSLEKSYELPDGQV YVALDFENEMATAASSSSLEKSYELPDGQVI VALDFENEMATAASSSSLEKSYELPDGQVIT ALDFENEMATAASSSSLEKSYELPDGQVITI
sp|Q14241|ELOA1_HUMAN_251	R.LGASphosQER.H	R.LGASphosQER.H	-1.65741	2.05153	4	3	sp|Q14241|ELOA1_HUMAN	STYQ	Q1	0.993	0.9911	1	1	PGKGHSNAFQDRLGASQERHLGEPHGKGVVS
sp|Q6ZWE6|PKHM3_HUMAN_152	R.SRSphosDITQVDWR.V	R.SRSphosDITQVDWR.V	-1.65285	0.22357	2	4	sp|Q6ZWE6|PKHM3_HUMAN	STYX	NR	0.9996	1	0.956	0.955	LDETSTFKPGHARSRSDITQVDWRVVLKTTP
sp|O43719|HTSF1_HUMAN_713 714_C	K.LFDEEED(SS)phosEKLFDDSDER.G	K.LFDEEED(SS)phosEKLFDDSDER.G	-1.64083	2.35965	5	3	sp|O43719|HTSF1_HUMAN	STYX	Q1	1	1	1	1	EDDDSNEKLFDEEEDSSEKLFDDSDERGTLG DDDSNEKLFDEEEDSSEKLFDDSDERGTLGG
sp|Q13085|ACACA_HUMAN_77 78_C	R.(SS)phosMSGLHLVK.Q	R.(SS)phosMSGLHLVK.Q	-1.64083	1.08066	6	8	sp|Q13085|ACACA_HUMAN	STYX	Q1	1	1	0.998	0.999	LGISSLQDGLALHIRSSMSGLHLVKQGRDRK GISSLQDGLALHIRSSMSGLHLVKQGRDRKK
sp|Q13427|PPIG_HUMAN_695 696_C	K.IKQ(SS)phosQDNELK.S	K.IKQ(SS)phosQDNELK.S	-1.64083	1.45918	5	6	sp|Q13427|PPIG_HUMAN	STYQ	Q1	0.984	0.9986	1	1	KKADRDQSPFSKIKQSSQDNELKSSMLKNKE KADRDQSPFSKIKQSSQDNELKSSMLKNKED
sp|Q13427|PPIG_HUMAN_696	K.IKQSSphosQDNELK.S	K.IKQSSphosQDNELK.S	-1.64083	1.49089	5	5	sp|Q13427|PPIG_HUMAN	STYQ	Q1	0.997	0.9993	0.976	0.977	KADRDQSPFSKIKQSSQDNELKSSMLKNKED
sp|Q8WU79|SMAP2_HUMAN_219	K.TSNTLEKDLDLLASVPSphosPSSSGSR.K	K.DLDLLASVPSphosPSSSGSR.K	-1.64083	0.766187	1	2	sp|Q8WU79|SMAP2_HUMAN	STYX	Q1	0.9299	0.9976	0.888	0.992	SNTLEKDLDLLASVPSPSSSGSRKVVGSMPT
sp|Q9Y3B9|RRP15_HUMAN_11	A.PDSRVSphosEEENLKK.T	R.VSphosEEENLKK.T	-1.64083	1.25069	5	4	sp|Q9Y3B9|RRP15_HUMAN	STYX	Q1	1	0.9989	1	1	_____MAAAAPDSRVSEEENLKKTPKKKMKM
sp|Q8NAV2|CH058_HUMAN_233	R.APLPSphosPLHTPGNR.G	R.APLPSphosPLHTPGNR.G	-1.64083	-0.94818	1	2	sp|Q8NAV2|CH058_HUMAN	STYX	Q4	0.9923	0.9999	0.994	0.998	PGDPGEEESTRAPLPSPLHTPGNRGQGPWEL
sp|Q8NFH5|NUP35_HUMAN_273 279 280_C	K.TLGTphosPTQPG(ST)phosPR.L	K.TLGTphosPTQPG(ST)phosPR.L	-1.64083	-1.03267	1	1	sp|Q8NFH5|NUP35_HUMAN	STYX	Q4	0.9933	0.9873	1.284	1.08	SSPSLAFTPPIKTLGTPTQPGSTPRISTMRP FTPPIKTLGTPTQPGSTPRISTMRPLATAYK TPPIKTLGTPTQPGSTPRISTMRPLATAYKA
sp|Q99590|SCAFB_HUMAN_798 799 800_C	R.FHSP(STT)phosWSPNKDTPQEK.K	R.FHSP(STT)phosWSPNKDTPQEK.K	-1.64083	-5.73311	1	1	sp|Q99590|SCAFB_HUMAN	STYX	Q4	0.9287	0.966	0.928	0.673	KTKKPRTRRSRFHSPSTTWSPNKDTPQEKKR TKKPRTRRSRFHSPSTTWSPNKDTPQEKKRP KKPRTRRSRFHSPSTTWSPNKDTPQEKKRPQ
sp|Q5JSZ5|PRC2B_HUMAN_224 225 226_C	R.HIISATSL(STS)phosPTELGSR.N	R.HIISATSL(STS)phosPTELGSR.N	-1.62462	0.118519	2	8	sp|Q5JSZ5|PRC2B_HUMAN	STYX	NR	0.9932	0.9996	0.996	0.998	WREGGGRHIISATSLSTSPTELGSRNSSTGD REGGGRHIISATSLSTSPTELGSRNSSTGDG EGGGRHIISATSLSTSPTELGSRNSSTGDGA
sp|Q86VR2|RETR3_HUMAN_26	R.DVSphosGSWER.D	R.DVSphosGSWER.D	-1.62462	0.266892	6	3	sp|Q86VR2|RETR3_HUMAN	STYX	NR	0.9997	0.9996	0.995	0.991	PGPASGSTFRGRRDVSGSWERDQQVEAAQRA
sp|Q8N2U9|S66A2_HUMAN_110	R.SphosFTAADSKDEEVK.V	R.SphosFTAADSKDEEVK.V	-1.61413	0.00835882	4	3	sp|Q8N2U9|S66A2_HUMAN	STYX	NR	1	1	0.986	0.984	CTEVRVANELNARRRSFTAADSKDEEVKVAP
sp|O14867|BACH1_HUMAN_445	R.ISESphosPEPGQR.T	R.ISESphosPEPGQR.T	-1.61233	-0.0104067	2	4	sp|O14867|BACH1_HUMAN	STYX	NR	0.9979	0.9996	0.993	0.992	QKRSECPWLGIRISESPEPGQRTFTTLSSVN
sp|Q12888|TP53B_HUMAN_922	K.EGDIIPPLTGATphosPPLIGHLK.L	K.EGDIIPPLTGATphosPPLIGHLK.L	-1.61162	1.01508	10	15	sp|Q12888|TP53B_HUMAN	STYX	Q1	1	1	0.991	0.99	TLPKEGDIIPPLTGATPPLIGHLKLEPKRHS
sp|Q14149|MORC3_HUMAN_765	K.SESphosPDHMVSQYQQALEEIER.L	K.SESphosPDHMVSQYQQALEEIER.L	-1.61162	-0.0748967	4	7	sp|Q14149|MORC3_HUMAN	STYX	NR	1	1	0.993	0.993	TDAVFLLESINGKSESPDHMVSQYQQALEEI
sp|P04637|P53_HUMAN_312 313 314 315_C	R.ALPNN(TSSS)phosPQPK.K	R.ALPNN(TSSS)phosPQPK.K	-1.60841	2.64193	1	17	sp|P04637|P53_HUMAN	STYX	Q1	0.9977	1	0.999	1.001	HELPPGSTKRALPNNTSSSPQPKKKPLDGEY ELPPGSTKRALPNNTSSSPQPKKKPLDGEYF LPPGSTKRALPNNTSSSPQPKKKPLDGEYFT PPGSTKRALPNNTSSSPQPKKKPLDGEYFTL
sp|Q96T37|RBM15_HUMAN_212	K.ISHLSGSGSphosGDER.V	K.ISHLSGSGSphosGDER.V	-1.60841	1.62884	1	1	sp|Q96T37|RBM15_HUMAN	STYX	Q1	0.9996	0.9997	0.905	0.822	FGDVSVKISHLSGSGSGDERVAFVNFRRPED
tr|E7EV07|E7EV07_HUMAN_415	R.LQRASphosQDTPSAGLLGENQLR.Q	R.LQRASphosQDTPSAGLLGENQLR.Q	-1.60841	0.619708	1	2	tr|E7EV07|E7EV07_HUMAN	STYQ	Q1	0.9999	1	0.987	0.991	LQGPCKPGGFRLQRASQDTPSAGLLGENQLR
sp|Q01082|SPTB2_HUMAN_781	K.IVSSSDVGHDEYSTQSphosLVK.K	K.IVSSSDVGHDEYSTQSphosLVKK.H	-1.60841	-0.404449	1	2	sp|Q01082|SPTB2_HUMAN	STYX	Q4	1	1	0.817	0.914	IVSSSDVGHDEYSTQSLVKKHKDVAEEIANY
sp|Q9UBP0|SPAST_HUMAN_597	R.SVSphosPQTLEAYIR.W	R.SVSphosPQTLEAYIR.W	-1.60841	-1.13604	2	2	sp|Q9UBP0|SPAST_HUMAN	STYX	Q4	0.9995	0.9992	0.994	0.993	LSDFTESLKKIKRSVSPQTLEAYIRWNKDFG
sp|P49116|NR2C2_HUMAN_219	K.DLRSphosPLIATPTFVADKDGAR.Q	R.SphosPLIATPTFVADKDGAR.Q	-1.60841	-0.089252	1	3	sp|P49116|NR2C2_HUMAN	STYX	NR	1	1	0.997	0.997	CAASTEKIYIRKDLRSPLIATPTFVADKDGA
sp|Q9H8W4|PKHF2_HUMAN_16	R.RISphosIVENCFGAAGQPLTIPGR.V	R.RISphosIVENCFGAAGQPLTIPGR.V	-1.60841	0.244172	1	3	sp|Q9H8W4|PKHF2_HUMAN	STYX	NR	1	1	0.998	0.998	MVDRLANSEANTRRISIVENCFGAAGQPLTI
sp|Q9NU19|TB22B_HUMAN_57 58_C	K.KA(SS)phosFHEFAR.N	K.KA(SS)phosFHEFAR.N	-1.60841	0.396175	1	3	sp|Q9NU19|TB22B_HUMAN	STYX	NR	0.9963	0.9999	1	1	ERSKVNTVPLKNKKASSFHEFARNTSDAWDI RSKVNTVPLKNKKASSFHEFARNTSDAWDIG
sp|Q9UPU5|UBP24_HUMAN_914	T.AMPTVATSVQSphosPYR.S	K.MLTATAMPTVATSVQSphosPYR.S	-1.60841	0.396175	1	4	sp|Q9UPU5|UBP24_HUMAN	STYX	NR	0.9808	0.9999	0.897	0.962	MLTATAMPTVATSVQSPYRSTKLVIIERLLL
sp|Q8WXE0|CSKI2_HUMAN_946	R.GSSphosGEGLPFAEEGNLTIK.Q	R.GSSphosGEGLPFAEEGNLTIK.Q	-1.59955	-0.447706	2	1	sp|Q8WXE0|CSKI2_HUMAN	STYX	Q4	1	0.9999	0.961	0.924	EEEPGPEGTPPSRGSSGEGLPFAEEGNLTIK
sp|Q8WU20|FRS2_HUMAN_225 226 227_C	R.VSNAE(SST)phosPKEEPSSIEDRDPQILLEPEGVK.F	R.VSNAE(SST)phosPKEEPSSIEDRDPQILLEPEGVK.F	-1.59325	0.624444	2	1	sp|Q8WU20|FRS2_HUMAN	STYX	Q1	0.9315	0.9535	0.963	0.998	TSVHVPLEARVSNAESSTPKEEPSSIEDRDP SVHVPLEARVSNAESSTPKEEPSSIEDRDPQ VHVPLEARVSNAESSTPKEEPSSIEDRDPQI
sp|Q96ST2|IWS1_HUMAN_725	R.MNSTGGQTphosPR.R	R.MNSTGGQTphosPR.R	-1.59255	0.16171	2	3	sp|Q96ST2|IWS1_HUMAN	STYX	NR	0.9976	0.9996	0.855	0.949	EQMPQRRRMNSTGGQTPRRDLEKVLTGEEKA
sp|P29590|PML_HUMAN_408 409_C	K.ASPEAA(ST)phosPRDPIDVDLPEEAER.V	K.ASPEAA(ST)phosPRDPIDVDLPEEAER.V	-1.59185	0.124015	2	2	sp|P29590|PML_HUMAN	STYX	NR	0.9994	1	0.998	0.998	GKDAAVSKKASPEAASTPRDPIDVDLPEEAE KDAAVSKKASPEAASTPRDPIDVDLPEEAER
sp|Q5UIP0|RIF1_HUMAN_1772	K.KADVQAPVSphosPSETSQANPY.S	K.KADVQAPVSphosPSETSQANPYSEGQFLDEHHSVNF.H	-1.58527	0.676283	2	1	sp|Q5UIP0|RIF1_HUMAN	STYX	Q1	1	0.9755	0.938	0.972	VEISETKKADVQAPVSPSETSQANPYSEGQF
sp|O00443|P3C2A_HUMAN_1553	R.SADAGSFSphosPTPGQIGGAVK.L	R.SADAGSFSphosPTPGQIGGAVK.L	-1.58217	-0.0326684	4	7	sp|O00443|P3C2A_HUMAN	STYX	NR	1	1	0.994	0.995	EKAEGIARSADAGSFSPTPGQIGGAVKLSIS
sp|Q5T481|RBM20_HUMAN_1120	K.SLEVRSphosPEYTEVELK.Q	R.SphosPEYTEVELK.Q	-1.58011	0.385833	4	7	sp|Q5T481|RBM20_HUMAN	STYX	NR	1	1	0.996	0.996	PENSRYVEMKSLEVRSPEYTEVELKQPLSLP
sp|Q5EBL4|RIPL1_HUMAN_345 346_C	R.(TS)phosPQPESGIKR.L	R.(TS)phosPQPESGIK.R	-1.57977	-0.0607522	2	10	sp|Q5EBL4|RIPL1_HUMAN	STYX	NR	0.9999	1	1	1	EENRIPQPPPIAHPRTSPQPESGIKRLFSFF ENRIPQPPPIAHPRTSPQPESGIKRLFSFFS
sp|Q99567|NUP88_HUMAN_166 167 168 169 170_C	R.FF(TSSTS)phosLTLK.H	R.FF(TSSTS)phosLTLK.H	-1.57943	0.533678	2	7	sp|Q99567|NUP88_HUMAN	STYX	Q1	0.9837	0.9888	0.999	1	STVNCSTTPVAERFFTSSTSLTLKHAAWYPS TVNCSTTPVAERFFTSSTSLTLKHAAWYPSE VNCSTTPVAERFFTSSTSLTLKHAAWYPSEI NCSTTPVAERFFTSSTSLTLKHAAWYPSEIL CSTTPVAERFFTSSTSLTLKHAAWYPSEILD
sp|P04637|P53_HUMAN_315	R.ALPNNTSSSphosPQPK.K	R.ALPNNTSSSphosPQPK.K	-1.5767	2.34103	2	3	sp|P04637|P53_HUMAN	STYX	Q1	0.9983	1	0.963	0.937	PPGSTKRALPNNTSSSPQPKKKPLDGEYFTL
sp|Q5VUA4|ZN318_HUMAN_2030 2035	R.VSphosPAHRSphosPTVLCQK.V	R.VSphosPAHRSphosPTVLCQK.V	-1.5767	0.574649	1	4	sp|Q5VUA4|ZN318_HUMAN	STYX	Q1	0.9994	0.9998	0.991	0.991	GNLGDMPVDFCTTRVSPAHRSPTVLCQKVCE MPVDFCTTRVSPAHRSPTVLCQKVCEENSVS
sp|Q5VZL5|ZMYM4_HUMAN_1071	K.TLSQGESQTSphosEHELFLDTK.L	K.TLSQGESQTSphosEHELFLDTK.L	-1.5767	1.15258	7	2	sp|Q5VZL5|ZMYM4_HUMAN	STYX	Q1	0.9998	0.999	0.993	0.992	EDEEKKTLSQGESQTSEHELFLDTKIFEKDQ
sp|Q9BVW5|TIPIN_HUMAN_224	K.LLSNSQTphosLGNDMLMNTPR.A	K.LLSNSQTphosLGNDMLMNTPR.A	-1.5767	3.24989	1	3	sp|Q9BVW5|TIPIN_HUMAN	STYX	Q1	0.9999	1	0.978	0.908	LALERRQAKLLSNSQTLGNDMLMNTPRAHTV
sp|Q9UK61|TASOR_HUMAN_673	R.SSHSphosLDYDKDR.V	R.SSHSphosLDYDKDR.V	-1.5767	0.691692	7	6	sp|Q9UK61|TASOR_HUMAN	STYX	Q1	1	1	0.974	0.992	SRGEAIISGKQRSSHSLDYDKDRVKELINLI
sp|Q9Y2W1|TR150_HUMAN_737	R.GKSphosRESVDSR.D	R.GKSphosRESVDSR.D	-1.5767	0.48606	2	1	sp|Q9Y2W1|TR150_HUMAN	STYX	Q1	0.9921	0.9583	0.992	0.991	ERRKKHKERDLKRGKSRESVDSRDSSHSRER
sp|O60381|HBP1_HUMAN_382	R.RASLSphosCGGPGGQDFAR.S	R.RASLSphosCGGPGGQDFAR.S	-1.5767	0.171977	1	2	sp|O60381|HBP1_HUMAN	STYX	NR	0.9998	1	0.867	0.829	VYVLSSMARQRRASLSCGGPGGQDFARSGFS
sp|O75427|LRCH4_HUMAN_432	R.KDSphosLLKPGLR.A	R.KDSphosLLKPGLR.A	-1.5767	0.167645	4	6	sp|O75427|LRCH4_HUMAN	STYX	NR	0.9999	1	1	1	RQQQQSGAWGAPRKDSLLKPGLRAVVGGAAA
sp|O95251|KAT7_HUMAN_50	R.SSARLSphosQSSQDSSPVR.N	R.LSphosQSSQDSSPVR.N	-1.5767	-0.0178819	1	2	sp|O95251|KAT7_HUMAN	STYQ	NR	0.9815	0.9997	0.985	0.986	TSRRSARVTRSSARLSQSSQDSSPVRNLQSF
sp|Q86UU0|BCL9L_HUMAN_88	K.ANQISphosPSNSSLK.N	K.ANQISphosPSNSSLK.N	-1.5767	0.137257	3	21	sp|Q86UU0|BCL9L_HUMAN	STYX	NR	0.9998	1	0.991	0.995	KGVGAGNHGAKANQISPSNSSLKNPQAGVPP
sp|Q9Y4A5|TRRAP_HUMAN_1628	R.FITLLLPGGAQTAVRPGSphosPSTSTMR.L	R.FITLLLPGGAQTAVRPGSphosPSTSTMR.L	-1.5767	0.173782	1	5	sp|Q9Y4A5|TRRAP_HUMAN	STYX	NR	0.9817	0.9978	0.91	0.937	TLLLPGGAQTAVRPGSPSTSTMRLDLQFQAI
sp|Q9UHI6|DDX20_HUMAN_268	R.LNSphosSDPSLIGLK.Q	R.LNSphosSDPSLIGLK.Q	-1.56185	0.111509	2	4	sp|Q9UHI6|DDX20_HUMAN	STYX	NR	1	1	0.993	0.993	ALTKYMRDPTFVRLNSSDPSLIGLKQYYKVV
sp|P46087|NOP2_HUMAN_599	K.FSNSIPQSQTGNSphosETATPTNVDLPQVIPK.S	K.FSNSIPQSQTGNSphosETATPTNVDLPQVIPK.S	-1.54861	1.4468	2	1	sp|P46087|NOP2_HUMAN	STYX	Q1	0.9857	0.9618	0.858	0.326	FKKFSNSIPQSQTGNSETATPTNVDLPQVIP
sp|P24928|RPB1_HUMAN_1891 1892 1905 1906_C	K.YSP(TS)phosPTYSPTSPVYTP(TS)phosPK.Y	K.YSP(TS)phosPTYSPTSPVYTP(TS)phosPK.Y	-1.54567	0.74242	1	10	sp|P24928|RPB1_HUMAN	STYX	Q1	0.9909	0.9979	0.979	1.16	PTSPTYSPTTPKYSPTSPTYSPTSPVYTPTS TSPTYSPTTPKYSPTSPTYSPTSPVYTPTSP PTSPTYSPTSPVYTPTSPKYSPTSPTYSPTS TSPTYSPTSPVYTPTSPKYSPTSPTYSPTSP
sp|Q14839|CHD4_HUMAN_1570	K.IEENSphosLKEEESIEGEK.E	K.IEENSphosLKEEESIEGEK.E	-1.54567	1.35295	3	10	sp|Q14839|CHD4_HUMAN	STYX	Q1	1	1	0.999	0.998	APVPPAEDGIKIEENSLKEEESIEGEKEVKS
sp|P06400|RB_HUMAN_612	L.NLPLQNNHTAADMYLSPVRSphosPK.K	L.NLPLQNNHTAADMYLSPVRSphosPK.K	-1.54567	-1.64191	7	2	sp|P06400|RB_HUMAN	STYX	Q4	1	1	0.99	0.997	QNNHTAADMYLSPVRSPKKKGSTTRVNSTAN
sp|Q6ZSZ5|ARHGI_HUMAN_1202	R.RDSphosAPTENR.L	R.RDSphosAPTENR.L	-1.54567	-0.951748	3	3	sp|Q6ZSZ5|ARHGI_HUMAN	STYX	Q4	0.9994	0.9995	0.991	0.992	VGPEYAERPEVARRDSAPTENRLAKSDVPIQ
sp|O95049|ZO3_HUMAN_169	R.SPGGGSphosEANGLALVSGFKR.L	R.SPGGGSphosEANGLALVSGFK.R	-1.54567	0.244172	3	3	sp|O95049|ZO3_HUMAN	STYX	NR	1	1	0.606	0.759	RGRAGSHGRRSPGGGSEANGLALVSGFKRLP
sp|P12270|TPR_HUMAN_640 641_C	S.SLDDVSLA(ST)phosPK.R	R.ILLSQTTGVAIPLHASSLDDVSLA(ST)phosPK.R	-1.54567	-0.323717	7	5	sp|P12270|TPR_HUMAN	STYX	NR	0.9984	0.998	0.998	0.999	AIPLHASSLDDVSLASTPKRPSTSQTVSTPA IPLHASSLDDVSLASTPKRPSTSQTVSTPAP
sp|P21333|FLNA_HUMAN_2523	R.LVSphosNHSLHETSSVFVDSLTK.A	R.LVSphosNHSLHETSSVFVDSLTK.A	-1.54567	-0.0748967	1	1	sp|P21333|FLNA_HUMAN	STYX	NR	0.993	0.9983	0.5	0.901	GGSPFKAKVTGPRLVSNHSLHETSSVFVDSL
sp|P25490|TYY1_HUMAN_118	R.EEVVGGDDSphosDGLR.A	R.EEVVGGDDSphosDGLR.A	-1.54567	-0.0606828	3	5	sp|P25490|TYY1_HUMAN	STYX	NR	0.9992	0.9999	1	1	VILVQTREEVVGGDDSDGLRAEDGFEDQILI
sp|Q15052|ARHG6_HUMAN_684	R.KDSphosIPQVLLPEEEK.L	R.KDSphosIPQVLLPEEEKLIIEETR.S	-1.54567	0.364924	1	9	sp|Q15052|ARHG6_HUMAN	STYX	NR	1	1	1	1	SANFQQGHGSSTRKDSIPQVLLPEEEKLIIE
sp|Q86YV5|PRAG1_HUMAN_491 492_C	R.TIYL(SS)phosPDSAVGVQWPR.G	R.TIYL(SS)phosPDSAVGVQWPR.G	-1.54567	0.207831	3	4	sp|Q86YV5|PRAG1_HUMAN	STYX	NR	0.998	0.9974	0.994	0.996	VMAAHPEEDHRTIYLSSPDSAVGVQWPRGPV MAAHPEEDHRTIYLSSPDSAVGVQWPRGPVS
sp|Q8NDI1|EHBP1_HUMAN_428	K.DLSTSphosPKPSPIPSPVLGR.K	K.DLSTSphosPKPSPIPSPVLGR.K	-1.54567	0.0870708	1	1	sp|Q8NDI1|EHBP1_HUMAN	STYX	NR	0.9993	1	0.933	0.919	VLNENTVSAGKDLSTSPKPSPIPSPVLGRKP
sp|Q9H400|LIME1_HUMAN_200	K.TEVTPAAQVDVLYphosSR.V	K.TEVTPAAQVDVLYphosSR.V	-1.54567	0.311286	1	3	sp|Q9H400|LIME1_HUMAN	STYX	NR	0.9997	1	0.979	0.979	QGKTEVTPAAQVDVLYSRVCKPKRRDPGPTT
sp|Q9P270|SLAI2_HUMAN_353	R.NSPRPSphosPK.Q	R.NSPRPSphosPK.Q	-1.53433	-0.56765	2	2	sp|Q9P270|SLAI2_HUMAN	STYX	Q4	0.9578	0.9983	0.997	0.997	AVNRFSPSPRNSPRPSPKQSPRNSPRSRSPA
sp|Q12888|TP53B_HUMAN_1480 1481_C	A.AGPSDGLDA(SS)phosPGNSFVGLR.V	A.AGPSDGLDA(SS)phosPGNSFVGLR.V	-1.52857	-0.039638	6	6	sp|Q12888|TP53B_HUMAN	STYX	NR	1	1	0.998	0.999	IPFQAAAGPSDGLDASSPGNSFVGLRVVAKW PFQAAAGPSDGLDASSPGNSFVGLRVVAKWS
sp|Q9BZL4|PP12C_HUMAN_399	R.TLNGVSSphosPPHPSPK.S	R.TLNGVSSphosPPHPSPK.S	-1.52443	-0.375556	2	5	sp|Q9BZL4|PP12C_HUMAN	STYX	NR	1	1	0.987	0.951	TEPPPAEPRTLNGVSSPPHPSPKSPVQLEEA
sp|P28715|ERCC5_HUMAN_563	K.FDSSLLSSphosDDETK.C	K.FDSSLLSSphosDDETK.C	-1.5153	0.434587	1	2	sp|P28715|ERCC5_HUMAN	STYX	Q1	0.9998	0.9999	0.924	0.969	ELCPYESKFDSSLLSSDDETKCKPNSASEVI
sp|O75400|PR40A_HUMAN_932 933_C	K.DSGNWD(TS)phosGSELSEGELEKR.R	K.DSGNWD(TS)phosGSELSEGELEKR.R	-1.5153	-2.20955	1	1	sp|O75400|PR40A_HUMAN	STYX	Q4	0.9995	0.9914	0.654	0.524	KSPKKKTGKDSGNWDTSGSELSEGELEKRRR SPKKKTGKDSGNWDTSGSELSEGELEKRRRT
sp|Q9BYW2|SETD2_HUMAN_1228	K.SWQQTTFQNRPDSphosR.L	K.SWQQTTFQNRPDSphosR.L	-1.51342	1.80992	4	1	sp|Q9BYW2|SETD2_HUMAN	STYX	Q1	0.9994	0.9947	0.95	0.972	PNKSWQQTTFQNRPDSRLGKTELSFSSSCEI
sp|Q99708|CTIP_HUMAN_315	R.FSDSTSKTphosPPQEELPTR.V	K.TphosPPQEELPTR.V	-1.5103	0.343707	2	11	sp|Q99708|CTIP_HUMAN	STYX	NR	0.944	0.9997	0.95	0.99	RNTEDSLRFSDSTSKTPPQEELPTRVSSPVF
sp|Q8NEV8|EXPH5_HUMAN_1074	K.FSPSSphosPESANECSK.V	K.FSPSSphosPESANECSK.V	-1.50411	-0.163572	2	2	sp|Q8NEV8|EXPH5_HUMAN	STYX	NR	0.9975	0.9999	0.993	0.934	EDAMGNYMLNKFSPSSPESANECSKVLSDSA
sp|Q9UQ35|SRRM2_HUMAN_1541	R.SGSphosSQELDVKPSASPQER.S	R.SGSphosSQELDVKPSASPQER.S	-1.49858	-0.447706	4	3	sp|Q9UQ35|SRRM2_HUMAN	STYX	Q4	1	1	0.959	0.975	KTVARTPLGQRSRSGSSQELDVKPSASPQER
sp|Q12888|TP53B_HUMAN_782	K.CSphosDSQSWEDIAPEIEPCAENR.L	K.CSphosDSQSWEDIAPEIEPCAENR.L	-1.49797	1.68896	2	7	sp|Q12888|TP53B_HUMAN	STYX	Q1	1	1	0.975	0.478	RVDVSCEPLEGVEKCSDSQSWEDIAPEIEPC
sp|Q562F6|SGO2_HUMAN_845	K.GVHDLEKDNFFSLTphosPK.D	K.GVHDLEKDNFFSLTphosPK.D	-1.48585	2.49571	2	3	sp|Q562F6|SGO2_HUMAN	STYX	Q1	1	1	0.938	0.978	NKGVHDLEKDNFFSLTPKDKETISENLQVTN
sp|P49327|FAS_HUMAN_45	K.AGLYphosGLPR.R	K.AGLYphosGLPR.R	-1.48555	0.375416	1	1	sp|P49327|FAS_HUMAN	STYX	Q1	0.9779	0.9995	1	1	VDMVTDDDRRWKAGLYGLPRRSGKLKDLSRF
sp|Q5T481|RBM20_HUMAN_980	K.AVGNGAAEISLKSphosPR.E	K.AVGNGAAEISLKSphosPR.E	-1.48555	0.78257	3	8	sp|Q5T481|RBM20_HUMAN	STYX	Q1	1	1	0.988	0.991	GVKAVGNGAAEISLKSPRELPSASTSCPSDM
sp|Q5VZL5|ZMYM4_HUMAN_1070 1071_C	K.TLSQGESQ(TS)phosEHELFLDTK.L	K.TLSQGESQ(TS)phosEHELFLDTK.L	-1.48555	1.30306	3	10	sp|Q5VZL5|ZMYM4_HUMAN	STYX	Q1	0.9997	0.9997	0.943	0.996	AEDEEKKTLSQGESQTSEHELFLDTKIFEKD EDEEKKTLSQGESQTSEHELFLDTKIFEKDQ
sp|Q8WWI1|LMO7_HUMAN_246	K.REDSphosFESLDSLGSR.S	K.REDSphosFESLDSLGSR.S	-1.48555	3.75556	1	2	sp|Q8WWI1|LMO7_HUMAN	STYX	Q1	0.9992	1	0.996	0.991	RGEFLAPPRHHKREDSFESLDSLGSRSLTSC
sp|Q8WXH0|SYNE2_HUMAN_6389	K.RGESEEPSSphosPQSLCHL.V	R.GESEEPSSphosPQSLCHLVAPGHER.S	-1.48555	1.83675	1	1	sp|Q8WXH0|SYNE2_HUMAN	STYX	Q1	0.9937	1	0.909	0.901	QTDSWRKRGESEEPSSPQSLCHLVAPGHERS
sp|Q9H4L7|SMRCD_HUMAN_95 96_C	R.GIQYIDL(SS)phosDSEDVVSPNCSNTVQEK.T	R.GIQYIDL(SS)phosDSEDVVSPNCSNTVQEK.T	-1.48555	0.514819	5	7	sp|Q9H4L7|SMRCD_HUMAN	STYX	Q1	0.9968	0.9957	0.966	0.751	ISYFKNQRGIQYIDLSSDSEDVVSPNCSNTV SYFKNQRGIQYIDLSSDSEDVVSPNCSNTVQ
sp|O15014|ZN609_HUMAN_842	K.TNSphosPAYSDISDAGEDGEGKVDSVK.S	K.TNSphosPAYSDISDAGEDGEGK.V	-1.48555	0.0870708	1	3	sp|O15014|ZN609_HUMAN	STYX	NR	0.9877	0.9972	0.996	0.996	VVTQNGAEASSVKTNSPAYSDISDAGEDGEG
sp|O15417|TNC18_HUMAN_999	R.ASphosPVAALK.A	R.ASphosPVAALK.A	-1.48555	-0.163253	3	3	sp|O15417|TNC18_HUMAN	STYX	NR	0.9945	0.9996	1	1	GTYGKAVSPPPSPRASPVAALKAKVIQKLED
sp|O75396|SC22B_HUMAN_137	R.NLGSphosINTELQDVQR.L	R.RNLGSphosINTELQDVQR.L	-1.48555	0.266892	31	34	sp|O75396|SC22B_HUMAN	STYX	NR	1	1	0.997	0.995	TKKLYIDSCARRNLGSINTELQDVQRIMVAN
sp|P06400|RB_HUMAN_821	K.ISEGLPTphosPTK.M	K.ISEGLPTphosPTK.M	-1.48555	-0.0326684	7	9	sp|P06400|RB_HUMAN	STYX	NR	0.9995	0.9999	0.988	0.992	ISPLKSPYKISEGLPTPTKMTPRSRILVSIG
sp|Q03001|DYST_HUMAN_236 237_C	R.LLDPEDVDV(SS)phosPDEK.S	R.LLDPEDVDV(SS)phosPDEK.S	-1.48555	-0.193949	3	1	sp|Q03001|DYST_HUMAN	STYX	NR	1	1	1	1	KIGVIRLLDPEDVDVSSPDEKSVITYVSSLY IGVIRLLDPEDVDVSSPDEKSVITYVSSLYD
sp|Q5JR12|PPM1J_HUMAN_76	R.ASFSRPTFLQLSphosPGGLR.R	R.ASFSRPTFLQLSphosPGGLR.R	-1.48555	-0.335291	1	2	sp|Q5JR12|PPM1J_HUMAN	STYX	NR	0.9999	1	0.999	0.998	VEARASFSRPTFLQLSPGGLRRADDHAGRAV
sp|Q5THJ4|VP13D_HUMAN_2455	R.SSphosLPVSNER.H	K.RSSphosLPVSNER.H	-1.48555	-0.209546	1	3	sp|Q5THJ4|VP13D_HUMAN	STYX	NR	0.9668	1	0.916	0.964	IVPKTVKSGVVTKRSSLPVSNERHLEVKVNV
sp|Q86V48|LUZP1_HUMAN_611	R.SphosQENILQGFSTSHK.E	R.SphosQENILQGFSTSHK.E	-1.48555	-0.225314	1	5	sp|Q86V48|LUZP1_HUMAN	STYQ	NR	0.9999	1	0.998	0.998	NSKAPVLSKYPYSCRSQENILQGFSTSHKEG
sp|Q9UKV3|ACINU_HUMAN_865	K.KPSISphosITTESLK.S	P.SISphosITTESLK.S	-1.48555	0.322174	1	5	sp|Q9UKV3|ACINU_HUMAN	STYX	NR	0.9998	1	0.886	0.986	RWGASTATTQKKPSISITTESLKSLIPDIKP
sp|Q86XZ4|SPAS2_HUMAN_192	K.SLTphosMHSIHNSQQPR.N	K.SLTphosMHSIHNSQQPR.N	-1.46249	3.33781	2	2	sp|Q86XZ4|SPAS2_HUMAN	STYX	Q1	0.9999	1	0.592	0.557	SMLQNGVSDFETKSLTMHSIHNSQQPRNAAK
sp|A1X283|SPD2B_HUMAN_675	K.LRPAKSphosQDKSLLDGEGPQAVGGQDVAFSR.S	K.LRPAKSphosQDK.S	-1.459	-3.34243	2	4	sp|A1X283|SPD2B_HUMAN	STYQ	Q4	1	0.9999	0.993	1	QVDICNLRSKLRPAKSQDKSLLDGEGPQAVG
sp|A8K0R7|ZN839_HUMAN_574	R.RGSphosIGAALSSR.D	R.RGSphosIGAALSSR.D	-1.4564	0.374734	1	4	sp|A8K0R7|ZN839_HUMAN	STYX	Q1	0.9994	1	0.953	0.999	GPQLQALANLEARRGSIGAALSSRDVSGLPV
sp|Q12888|TP53B_HUMAN_484	K.DGDMHSSSphosLTVECSK.T	K.DGDMHSSSphosLTVECSK.T	-1.4564	1.77469	2	1	sp|Q12888|TP53B_HUMAN	STYX	Q1	0.9945	0.9988	0.963	0.98	EQSNDGKKDGDMHSSSLTVECSKTSEIEPKN
sp|Q12888|TP53B_HUMAN_784	K.CSDSphosQSWEDIAPEIEPCAENR.L	K.CSDSphosQSWEDIAPEIEPCAENR.L	-1.4564	1.15564	5	9	sp|Q12888|TP53B_HUMAN	STYQ	Q1	1	1	0.912	0.977	DVSCEPLEGVEKCSDSQSWEDIAPEIEPCAE
sp|Q7L2J0|MEPCE_HUMAN_60 69	R.CAPSAGSphosPAAAVGRESphosPGAAAT.S	R.CAPSAGSphosPAAAVGRESphosPGAAATSSSGPQAQQHR.G	-1.4564	0.910748	1	3	sp|Q7L2J0|MEPCE_HUMAN	STYX	Q1	0.9298	0.9752	0.967	0.994	GGTERGPGRCAPSAGSPAAAVGRESPGAAAT CAPSAGSPAAAVGRESPGAAATSSSGPQAQQ
sp|Q9H583|HEAT1_HUMAN_1190	K.SphosQDLESVQEVGGSYWQR.V	K.SphosQDLESVQEVGGSYWQR.V	-1.4564	0.874222	24	5	sp|Q9H583|HEAT1_HUMAN	STYQ	Q1	1	1	0.996	0.998	GTVQQKRRQKMQQKKSQDLESVQEVGGSYWQ
sp|P49792|RBP2_HUMAN_1456	K.SGSSFVHQASphosFK.F	K.SGSSFVHQASphosFK.F	-1.4564	-0.595046	7	2	sp|P49792|RBP2_HUMAN	STYX	Q4	0.9999	0.9997	0.998	0.998	TKSANKSGSSFVHQASFKFGQGDLPKPINSD
sp|Q8NAX2|KDF1_HUMAN_158	K.STMGSSphosFSYPDVK.L	K.STMGSSphosFSYPDVK.L	-1.4564	-0.603825	1	1	sp|Q8NAX2|KDF1_HUMAN	STYX	Q4	0.9822	0.9964	0.945	0.979	PSRRDGQRLKSTMGSSFSYPDVKLKGIPVYP
sp|Q8TB72|PUM2_HUMAN_178 182	R.TPGSphosRQASphosPTEVVER.L	R.TPGSphosRQASphosPTEVVER.L	-1.4564	-0.591564	1	2	sp|Q8TB72|PUM2_HUMAN	STYX	Q4	0.9745	0.998	0.971	0.96	NGMDADCKDFNRTPGSRQASPTEVVERLGPN ADCKDFNRTPGSRQASPTEVVERLGPNTNPS
sp|P26196|DDX6_HUMAN_92	K.TSDVTSphosTKGNEFEDYCLKR.E	K.TSDVTSphosTKGNEFEDYCLKR.E	-1.4564	0.311286	1	1	sp|P26196|DDX6_HUMAN	STYX	NR	0.9569	0.9854	0.901	0.91	KLPPKDLRIKTSDVTSTKGNEFEDYCLKREL
sp|P51116|FXR2_HUMAN_192	K.RASphosLLGDMHFR.S	K.RASphosLLGDMHFR.S	-1.4564	0.294787	2	2	sp|P51116|FXR2_HUMAN	STYX	NR	1	1	1	1	ELFILSTTEAPVKRASLLGDMHFRSLRTKLL
sp|Q13435|SF3B2_HUMAN_311	R.SSLGQSASETphosEEDTVSVSK.K	R.SSLGQSASETphosEEDTVSVSK.K	-1.4564	-0.163253	3	3	sp|Q13435|SF3B2_HUMAN	STYX	NR	0.9977	0.9985	0.994	0.995	METDARSSLGQSASETEEDTVSVSKKEKNRK
sp|Q5VYV7|SLX4I_HUMAN_271	K.TGLLSRSphosPVCSCESASPCPK.Q	K.TGLLSRSphosPVCSCESASPCPK.Q	-1.4564	-0.103752	1	5	sp|Q5VYV7|SLX4I_HUMAN	STYX	NR	0.9876	1	0.93	0.978	KPHPGERLKTGLLSRSPVCSCESASPCPKQS
sp|Q9UDY2|ZO2_HUMAN_170	R.SRSphosWEDSPER.G	R.SRSphosWEDSPER.G	-1.4564	-0.0241819	1	8	sp|Q9UDY2|ZO2_HUMAN	STYX	NR	0.9766	1	0.958	0.987	YSERSRLNSHGGRSRSWEDSPERGRPHERAR
sp|P30419|NMT1_HUMAN_73	K.GSETDSphosAQDQPVK.M	K.GSETDSphosAQDQPVK.M	-1.4541	-0.0748967	2	3	sp|P30419|NMT1_HUMAN	STYX	NR	1	1	0.993	0.996	KKKQKKKKEKGSETDSAQDQPVKMNSLPAER
sp|P05783|K1C18_HUMAN_60	R.GGMGSphosGGLATGIAGGLAGMGGIQNEK.E	R.GGMGSphosGGLATGIAGGLAGMGGIQNEK.E	-1.4458	-1.44771	2	1	sp|P05783|K1C18_HUMAN	STYX	Q4	1	1	0.839	0.5	RISVSRSTSFRGGMGSGGLATGIAGGLAGMG
sp|P30050|RL12_HUMAN_126	R.ELSphosGTIK.E	R.ELSphosGTIK.E	-1.44552	1.04398	4	4	sp|P30050|RL12_HUMAN	STYX	Q1	0.995	0.9832	0.982	0.978	NIARQMRHRSLARELSGTIKEILGTAQSVGC
sp|Q14683|SMC1A_HUMAN_971	R.ISSphosIYAR.E	R.ISSphosIYAR.E	-1.44212	1.37853	2	2	sp|Q14683|SMC1A_HUMAN	STYX	Q1	0.9677	0.9719	0.984	0.984	SSQGEDSVSGSQRISSIYAREALIEIDYGDL
sp|Q96BD0|SO4A1_HUMAN_43	R.ASPGTPLSPGSphosLR.S	R.ASPGTPLSPGSphosLR.S	-1.43789	0.343707	4	5	sp|Q96BD0|SO4A1_HUMAN	STYX	NR	0.9984	0.9999	0.988	0.989	PPSRRASPGTPLSPGSLRSAAHSPLDTSKQP
sp|Q8IWJ2|GCC2_HUMAN_1490	R.SPVSSQQSphosLK.N	R.SPVSSQQSphosLK.N	-1.43536	-0.882888	2	2	sp|Q8IWJ2|GCC2_HUMAN	STYX	Q4	0.9897	0.9992	0.861	0.975	LKNEPTTRSPVSSQQSLKNLRERRNTDLPLL
sp|Q9Y2Y9|KLF13_HUMAN_268	R.TGSphosLSDYSR.S	R.TGSphosLSDYSR.S	-1.42811	0.385833	4	3	sp|Q9Y2Y9|KLF13_HUMAN	STYX	Q1	0.9992	0.9993	0.993	0.995	HPGMLQRRGGGSRTGSLSDYSRSDASSPTIS
sp|O15294|OGT1_HUMAN_20	R.MLSphosFQGLAELAHR.E	R.MLSphosFQGLAELAHR.E	-1.42783	1.26028	8	10	sp|O15294|OGT1_HUMAN	STYX	Q1	1	1	1	1	VGNVADSTEPTKRMLSFQGLAELAHREYQAG
sp|O60885|BRD4_HUMAN_1117	K.IHSphosPIIR.S	K.IHSphosPIIR.S	-1.42783	0.700917	4	4	sp|O60885|BRD4_HUMAN	STYX	Q1	0.9933	0.9904	1	1	VQPQPLVVVKEEKIHSPIIRSEPFSPSLRPE
sp|Q12888|TP53B_HUMAN_482 483 484_C	K.DGDMH(SSS)phosLTVECSK.T	K.DGDMH(SSS)phosLTVECSK.T	-1.42783	0.543016	3	6	sp|Q12888|TP53B_HUMAN	STYX	Q1	0.9996	0.9999	0.997	0.999	LEEQSNDGKKDGDMHSSSLTVECSKTSEIEP EEQSNDGKKDGDMHSSSLTVECSKTSEIEPK EQSNDGKKDGDMHSSSLTVECSKTSEIEPKN
sp|Q01082|SPTB2_HUMAN_777 778 779_C	K.IVSSSDVGHDE(YST)phosQSLVK.K	K.IVSSSDVGHDE(YST)phosQSLVK.K	-1.42783	-0.358069	1	4	sp|Q01082|SPTB2_HUMAN	STYQ	Q4	0.9993	0.9999	0.493	0.738	DILKIVSSSDVGHDEYSTQSLVKKHKDVAEE ILKIVSSSDVGHDEYSTQSLVKKHKDVAEEI LKIVSSSDVGHDEYSTQSLVKKHKDVAEEIA
sp|Q9UKI8|TLK1_HUMAN_38	R.SLLNHTphosPPSGRPR.E	R.SLLNHTphosPPSGR.P	-1.42783	-0.603825	3	9	sp|Q9UKI8|TLK1_HUMAN	STYX	Q4	0.999	1	0.959	0.988	PTPGSAAAARSLLNHTPPSGRPREGAMDELH
sp|Q12955|ANK3_HUMAN_1459	R.RQSphosFASL.A	R.RQSphosFASL.A	-1.42783	0.219914	6	4	sp|Q12955|ANK3_HUMAN	STYX	NR	0.9999	1	0.998	0.993	ESDQDDEIEKTDRRQSFASLALRKRYSYLTE
sp|Q5JRA6|TGO1_HUMAN_1539	K.KLSphosQEEYER.Q	K.KLSphosQEEYER.Q	-1.42783	-0.193949	1	1	sp|Q5JRA6|TGO1_HUMAN	STYQ	NR	0.9971	0.9987	0.995	0.996	NELYQQKEMALQKKLSQEEYERQEREHRLSA
sp|Q6WCQ1|MPRIP_HUMAN_671 672_C	K.QVPIAPVHLSSEDGGDRL(ST)phosHELTSLLEK.E	K.QVPIAPVHLSSEDGGDRL(ST)phosHELTSLLEK.E	-1.42783	0.221088	1	2	sp|Q6WCQ1|MPRIP_HUMAN	STYX	NR	0.9559	0.9691	0.678	0.94	IAPVHLSSEDGGDRLSTHELTSLLEKELEQS APVHLSSEDGGDRLSTHELTSLLEKELEQSQ
tr|A0A1B0GTL5|A0A1B0GTL5_HUMAN_911	R.LFTPSphosRSQEEEEEK.A	R.LFTPSphosRSQEEEEEK.A	-1.42783	0.0350762	5	7	tr|A0A1B0GTL5|A0A1B0GTL5_HUMAN	STYX	NR	0.9998	1	0.499	0.804	QPSTPPPKPPRLFTPSRSQEEEEEKAAVGLS
sp|P46100|ATRX_HUMAN_677	R.RPTETNPVTSNSphosDEECNETVK.E	R.RPTETNPVTSNSphosDEECNETVK.E	-1.42534	-0.951748	6	3	sp|P46100|ATRX_HUMAN	STYX	Q4	1	0.9927	0.997	0.997	TPLRRPTETNPVTSNSDEECNETVKEKQKLS
sp|Q6PJT7|ZC3HE_HUMAN_132 133 134 135_C	R.V(STSS)phosQESK.T	R.V(STSS)phosQESK.T	-1.42203	1.62482	4	4	sp|Q6PJT7|ZC3HE_HUMAN	STYQ	Q1	0.9983	0.9983	0.999	0.999	LAIPSARPEKRDSRVSTSSQESKTTNVRQTY AIPSARPEKRDSRVSTSSQESKTTNVRQTYD IPSARPEKRDSRVSTSSQESKTTNVRQTYDD PSARPEKRDSRVSTSSQESKTTNVRQTYDDG
sp|Q9UK58|CCNL1_HUMAN_325 329 330 341 342_C	K.GLNPDGTphosPAL(ST)phosLGGFSPASKP(SS)phosPR.E	K.GLNPDGTphosPAL(ST)phosLGGFSPASKP(SS)phosPR.E	-1.4171	1.06131	4	5	sp|Q9UK58|CCNL1_HUMAN	STYX	Q1	0.9882	0.993	1.094	1.294	LQEAKLKAKGLNPDGTPALSTLGGFSPASKP KLKAKGLNPDGTPALSTLGGFSPASKPSSPR LKAKGLNPDGTPALSTLGGFSPASKPSSPRE PALSTLGGFSPASKPSSPREVKAEEKSPISI ALSTLGGFSPASKPSSPREVKAEEKSPISIN
sp|O75665|OFD1_HUMAN_899	R.RQSphosNLQEVLER.E	R.RQSphosNLQEVLER.E	-1.41383	0.300273	2	2	sp|O75665|OFD1_HUMAN	STYX	NR	1	1	1	1	EQQVKERRQREERRQSNLQEVLERERRELEK
tr|G3V3B0|G3V3B0_HUMAN_67	R.KISphosVVSTK.G	R.KISphosVVSTK.G	-1.41383	0.0865622	2	2	tr|G3V3B0|G3V3B0_HUMAN	STYX	NR	0.9932	0.9985	0.995	0.992	EKKESSLPKSFKRKISVVSTKGVPAGNSDTE
sp|Q8TEW0|PARD3_HUMAN_852	K.SphosMDLGIADETK.L	K.SphosMDLGIADETK.L	-1.40814	0.173782	8	9	sp|Q8TEW0|PARD3_HUMAN	STYX	NR	1	1	0.998	0.998	SDASQLDFVKTRKSKSMDLGIADETKLNTVD
sp|Q01082|SPTB2_HUMAN_2358	K.RFSphosLFGK.K	K.RFSphosLFGK.K	-1.40222	0.124873	2	1	sp|Q01082|SPTB2_HUMAN	STYX	NR	0.9857	0.9014	1	1	GKREKDKEKDKEKRFSLFGKKK_________
sp|Q09666|AHNK_HUMAN_1452	K.ISphosIPDVGLHLK.G	K.MPEMSIKPQKISphosIPDVGLHLK.G	-1.40089	0.232676	4	17	sp|Q09666|AHNK_HUMAN	STYX	NR	1	1	1	1	PKFKMPEMSIKPQKISIPDVGLHLKGPKMKG
sp|O60583|CCNT2_HUMAN_549	K.HSSphosPHISR.D	K.HSSphosPHISR.D	-1.39982	0.41535	6	6	sp|O60583|CCNT2_HUMAN	STYX	Q1	0.9976	0.9983	0.974	0.995	RHSSSDEGSGKSKHSSPHISRDHKEKHKEHP
sp|O75494|SRS10_HUMAN_158	R.SphosHSDNDRFK.H	R.SphosHSDNDRFK.H	-1.39982	0.396175	1	2	sp|O75494|SRS10_HUMAN	STYX	Q1	0.9732	0.9985	0.506	0.555	SPRNSRPTGRPRRSRSHSDNDRFKHRNRSFS
sp|P02545|LMNA_HUMAN_211 212_C	K.NI(YS)phosEELR.E	K.NI(YS)phosEELR.E	-1.39982	0.925103	2	5	sp|P02545|LMNA_HUMAN	STYX	Q1	0.9749	0.9987	1	1	RLQTMKEELDFQKNIYSEELRETKRRHETRL LQTMKEELDFQKNIYSEELRETKRRHETRLV
sp|P02545|LMNA_HUMAN_212	K.NIYSphosEELR.E	K.NIYSphosEELR.E	-1.39982	0.836747	1	1	sp|P02545|LMNA_HUMAN	STYX	Q1	0.9984	0.999	0.947	0.968	LQTMKEELDFQKNIYSEELRETKRRHETRLV
sp|P26368|U2AF2_HUMAN_294	K.AFNLVKDSphosATGLSK.G	K.AFNLVKDSphosATGLSK.G	-1.39982	0.364924	2	7	sp|P26368|U2AF2_HUMAN	STYX	Q1	1	1	0.981	0.989	LTSFGPLKAFNLVKDSATGLSKGYAFCEYVD
sp|P78347|GTF2I_HUMAN_722	R.GREFSphosFEAWNAK.L	R.GREFSphosFEAWNAK.L	-1.39982	0.633214	1	1	sp|P78347|GTF2I_HUMAN	STYX	Q1	0.9892	0.9986	1	1	TNGSNVPFKPRGREFSFEAWNAKITDLKQKV
sp|Q96L91|EP400_HUMAN_165	R.AGAPGPGLGLCSSSphosPTGGFVDASVLVR.Q	R.AGAPGPGLGLCSSSphosPTGGFVDASVLVR.Q	-1.39982	0.859349	1	1	sp|Q96L91|EP400_HUMAN	STYX	Q1	0.9969	0.9893	0.953	0.942	VRAGAPGPGLGLCSSSPTGGFVDASVLVRQI
tr|I3L2J0|I3L2J0_HUMAN_555	R.EGSphosTEFDWGDETSR.D	R.EGSphosTEFDWGDETSR.D	-1.39982	1.12996	1	2	tr|I3L2J0|I3L2J0_HUMAN	STYX	Q1	1	0.9999	0.99	0.988	PGGAGRPAAVAAREGSTEFDWGDETSRDSEA
sp|Q9BXB4|OSB11_HUMAN_181	R.SFSLASSSNSphosPISQR.R	R.SFSLASSSNSphosPISQR.R	-1.39982	-0.393258	1	9	sp|Q9BXB4|OSB11_HUMAN	STYX	Q4	0.9907	0.9988	0.899	0.993	PPLKSRSFSLASSSNSPISQRRPSQNAISFF
sp|P11274|BCR_HUMAN_354	R.VSphosPSPTTYR.M	R.VSphosPSPTTYR.M	-1.39982	0.0613077	1	1	sp|P11274|BCR_HUMAN	STYX	NR	0.9976	0.9992	0.997	0.996	TSSEEDFSSGQSSRVSPSPTTYRMFRDKSRS
sp|P49750|YLPM1_HUMAN_756	R.SSYLESphosPR.G	R.SSYLESphosPR.G	-1.39982	-0.209546	1	3	sp|P49750|YLPM1_HUMAN	STYX	NR	0.9995	0.9997	0.988	0.996	SGGLLPDPPRSSYLESPRGPRFDGPRRFEDL
sp|Q16181|SEPT7_HUMAN_423 424_C	R.ILEQQN(SS)phosRTLEK.N	R.ILEQQN(SS)phosRTLEK.N	-1.39982	0.0870708	1	3	sp|Q16181|SEPT7_HUMAN	STYX	NR	0.9989	0.9996	0.666	0.666	KANWEAQQRILEQQNSSRTLEKNKKKGKIF_ ANWEAQQRILEQQNSSRTLEKNKKKGKIF__
sp|Q8IWB9|TEX2_HUMAN_399	K.TSSphosLVLEK.C	K.TSSphosLVLEK.C	-1.39982	0.255577	3	1	sp|Q8IWB9|TEX2_HUMAN	STYX	NR	0.9976	0.9901	0.994	0.986	SSQGSSLKDLGLKTSSLVLEKCSLSALVSKE
sp|Q9H7E2|TDRD3_HUMAN_535	R.SphosGPIKPEK.L	R.SphosGPIKPEK.L	-1.39982	-0.16718	1	4	sp|Q9H7E2|TDRD3_HUMAN	STYX	NR	0.9869	0.9994	1	1	PCDDKIFYNSGPKRRSGPIKPEKILESSIPM
sp|P42166|LAP2A_HUMAN_291 292 293 294 295 296_C	K.(SSSSSS)phosQPEHSAMLVSTAASPSLIK.E	K.(SSSSSS)phosQPEHSAMLVSTAASPSLIK.E	-1.3866	1.75473	4	17	sp|P42166|LAP2A_HUMAN	STYQ	Q1	0.9961	0.9989	0.804	1.716	LFISCKSSHDRCLEKSSSSSSQPEHSAMLVS FISCKSSHDRCLEKSSSSSSQPEHSAMLVST ISCKSSHDRCLEKSSSSSSQPEHSAMLVSTA SCKSSHDRCLEKSSSSSSQPEHSAMLVSTAA CKSSHDRCLEKSSSSSSQPEHSAMLVSTAAS KSSHDRCLEKSSSSSSQPEHSAMLVSTAASP
sp|O95210|STBD1_HUMAN_211	R.HSSphosWGDVGVGGSLK.A	R.HSSphosWGDVGVGGSLK.A	-1.38608	0.191594	4	10	sp|O95210|STBD1_HUMAN	STYX	NR	1	1	0.993	0.995	DRVDHEEWEMVPRHSSWGDVGVGGSLKAPVL
sp|P12270|TPR_HUMAN_641	S.SLDDVSLASTphosPK.R	R.ILLSQTTGVAIPLHASSLDDVSLASTphosPK.R	-1.38503	-0.625949	4	6	sp|P12270|TPR_HUMAN	STYX	Q4	1	0.999	0.991	0.984	IPLHASSLDDVSLASTPKRPSTSQTVSTPAP
sp|Q9P266|JCAD_HUMAN_694	R.YRDQQTQTSphosFSEEPQSSQLLPGAK.L	R.YRDQQTQTSphosFSEEPQSSQLLPGAK.L	-1.3819	0.0217793	2	3	sp|Q9P266|JCAD_HUMAN	STYX	NR	0.9762	0.9845	0.964	0.988	GSWPGHRYRDQQTQTSFSEEPQSSQLLPGAK
sp|Q9BVW5|TIPIN_HUMAN_220	K.LLSphosNSQTLGNDMLMNTPR.A	K.LLSphosNSQTLGNDMLMNTPR.A	-1.38164	3.03342	2	5	sp|Q9BVW5|TIPIN_HUMAN	STYX	Q1	0.9999	1	0.731	0.957	RNKQLALERRQAKLLSNSQTLGNDMLMNTPR
sp|P24928|RPB1_HUMAN_1870 1871 1877 1878_C	K.YSP(TS)phosPKYSP(TS)phosPTYSPTTPK.Y	K.YSP(TS)phosPKYSP(TS)phosPTYSPTTPK.Y	-1.37234	0.499547	1	2	sp|P24928|RPB1_HUMAN	STYX	Q1	0.9631	0.947	0.6	0.569	PTSPKYSPTSPKYSPTSPKYSPTSPTYSPTT TSPKYSPTSPKYSPTSPKYSPTSPTYSPTTP PTSPKYSPTSPKYSPTSPTYSPTTPKYSPTS TSPKYSPTSPKYSPTSPTYSPTTPKYSPTSP
sp|Q9BU19|ZN692_HUMAN_146	R.SphosWCSEATSGQELADLESEHDER.T	R.SphosWCSEATSGQELADLESEHDER.T	-1.37234	0.58882	5	3	sp|Q9BU19|ZN692_HUMAN	STYX	Q1	1	1	0.998	0.998	SEAPKPASLPHTTRRSWCSEATSGQELADLE
sp|Q9HCK8|CHD8_HUMAN_2008	R.TASPLPLRPDAPVEKSphosPEETATQVPSLESLTLK.L	R.TASPLPLRPDAPVEKSphosPEETATQVPSLESLTLK.L	-1.37234	-0.667019	4	6	sp|Q9HCK8|CHD8_HUMAN	STYX	Q4	0.9962	0.9967	0.997	0.999	TASPLPLRPDAPVEKSPEETATQVPSLESLT
sp|Q9Y3S2|ZN330_HUMAN_291	R.KDSphosDTESSDLFTNLNLGR.T	R.KDSphosDTESSDLFTNLNLGR.T	-1.37234	-0.384407	2	2	sp|Q9Y3S2|ZN330_HUMAN	STYX	Q4	0.994	0.9749	0.938	0.479	EAEDDEEEEDEGRKDSDTESSDLFTNLNLGR
sp|O60293|ZC3H1_HUMAN_766	K.ENDPLRTphosPEALPEEK.K	K.ENDPLRTphosPEALPEEK.K	-1.37234	0.0997818	13	17	sp|O60293|ZC3H1_HUMAN	STYX	NR	1	1	1	1	PKVPPKSEKENDPLRTPEALPEEKKIEYRLL
sp|P16070|CD44_HUMAN_697	R.KPSphosGLNGEASK.S	R.KPSphosGLNGEASK.S	-1.37234	0.0613077	7	20	sp|P16070|CD44_HUMAN	STYX	NR	0.9999	1	0.997	0.998	LVINSGNGAVEDRKPSGLNGEASKSQEMVHL
sp|P21675|TAF1_HUMAN_1155	R.DDDTASVTSphosLNSSATGR.C	R.DDDTASVTSphosLNSSATGR.C	-1.37234	-0.273677	1	1	sp|P21675|TAF1_HUMAN	STYX	NR	0.9989	0.9921	0.976	0.975	ASGNNHRDDDTASVTSLNSSATGRCLKIYRT
sp|P49790|NU153_HUMAN_632 633_C	K.IDSVAAQPTA(TS)phosPVVYTRPAISSF.S	K.IDSVAAQPTA(TS)phosPVVYTRPAISSF.S	-1.37234	0.0350762	13	5	sp|P49790|NU153_HUMAN	STYX	NR	0.9656	0.9984	0.997	0.994	FASPKIDSVAAQPTATSPVVYTRPAISSFSS ASPKIDSVAAQPTATSPVVYTRPAISSFSSS
sp|Q6VMQ6|MCAF1_HUMAN_898 899_C	R.TSLPTVGPSGL(YS)phosPSTNR.G	R.TSLPTVGPSGL(YS)phosPSTNR.G	-1.37234	-0.039638	1	2	sp|Q6VMQ6|MCAF1_HUMAN	STYX	NR	0.9968	0.9971	0.933	0.996	QATRTSLPTVGPSGLYSPSTNRGPIQMKIPI ATRTSLPTVGPSGLYSPSTNRGPIQMKIPIS
sp|Q8NFC6|BD1L1_HUMAN_800	R.KLSphosVLGK.D	R.KLSphosVLGK.D	-1.37234	0.221088	7	5	sp|Q8NFC6|BD1L1_HUMAN	STYX	NR	0.9984	0.9983	1	1	DKTERKSKHRNERKLSVLGKDGKPVSEYIIK
sp|Q96EX2|RNFT2_HUMAN_125	R.GGSphosLLQHVGGDHR.G	R.GGSphosLLQHVGGDHR.G	-1.37234	6.55075	1	1	sp|Q96EX2|RNFT2_HUMAN	STYX	NR	0.9998	0.9999	1	1	RQPHHHFHHGGHRGGSLLQHVGGDHRGHSEE
sp|Q99996|AKAP9_HUMAN_3690	R.NDSLLQTLSphosPDSEHVTLK.R	R.NDSLLQTLSphosPDSEHVTLK.R	-1.37234	-0.155699	3	8	sp|Q99996|AKAP9_HUMAN	STYX	NR	0.9979	1	0.964	0.993	KLKAELRNDSLLQTLSPDSEHVTLKRIYGKY
sp|Q9BXB4|OSB11_HUMAN_174	R.SFSphosLASSSNSPISQR.R	R.SFSphosLASSSNSPISQR.R	-1.37234	0.300315	1	11	sp|Q9BXB4|OSB11_HUMAN	STYX	NR	0.9955	1	0.808	0.996	EAIGKNNPPLKSRSFSLASSSNSPISQRRPS
sp|Q9UKV3|ACINU_HUMAN_825	R.KISphosVVSATK.G	R.KISphosVVSATK.G	-1.37234	0.167443	11	14	sp|Q9UKV3|ACINU_HUMAN	STYX	NR	0.9995	0.9997	0.996	0.998	EKKESSLPKSFKRKISVVSATKGVPAGNSDT
sp|Q9UJX2|CDC23_HUMAN_564 565_C	R.NQGETP(TT)phosEVPAPFFLPASLSANNTPTRR.V	R.NQGETP(TT)phosEVPAPFFLPASLSANNTPTRR.V	-1.36214	0.476345	2	1	sp|Q9UJX2|CDC23_HUMAN	STYX	Q1	1	0.9963	0.726	0.93	LLRQILQLRNQGETPTTEVPAPFFLPASLSA LRQILQLRNQGETPTTEVPAPFFLPASLSAN
sp|Q9NUL7|DDX28_HUMAN_94	R.APLASphosQGWK.S	R.APLASphosQGWK.S	-1.35936	-2.50544	2	2	sp|Q9NUL7|DDX28_HUMAN	STYQ	Q4	0.9784	0.9864	1	1	PARLTLGRWERAPLASQGWKSRRARRDHFSI
sp|P47712|PA24A_HUMAN_727	R.CSphosVSLSNVEAR.R	R.CSphosVSLSNVEAR.R	-1.35885	0.254458	2	4	sp|P47712|PA24A_HUMAN	STYX	NR	0.9997	1	0.997	0.997	MVESIEYRRQNPSRCSVSLSNVEARRFFNKE
sp|Q9UHB6|LIMA1_HUMAN_263	R.NLELPRLSphosETSIK.D	R.NLELPRLSphosETSIK.D	-1.35885	-0.118398	4	5	sp|Q9UHB6|LIMA1_HUMAN	STYX	NR	0.9982	0.9992	0.986	0.985	SEKNESRRNLELPRLSETSIKDRMAKYQAAV
sp|Q13615|MTMR3_HUMAN_903	R.TSphosLGSTLSLTR.S	R.TSphosLGSTLSLTR.S	-1.3476	0.173782	2	1	sp|Q13615|MTMR3_HUMAN	STYX	NR	0.9998	0.9998	0.911	0.943	SLVERPQVGSVVHRTSLGSTLSLTRSPCALP
sp|Q9HCM7|FBSL_HUMAN_141	R.RPLEAGSphosPGQDLEPACDGAR.K	R.RPLEAGSphosPGQDLEPACDGAR.K	-1.34636	0.0409415	2	4	sp|Q9HCM7|FBSL_HUMAN	STYX	NR	1	1	1	1	PPAEPSENRRPLEAGSPGQDLEPACDGARKV
sp|Q8IWA0|WDR75_HUMAN_798	K.VQDTSNTphosGLGEDIIHQLSK.S	K.VQDTSNTphosGLGEDIIHQLSK.S	-1.34537	0.406443	1	5	sp|Q8IWA0|WDR75_HUMAN	STYX	Q1	1	1	0.956	0.947	DEENDFTEKVQDTSNTGLGEDIIHQLSKSEE
sp|Q96B97|SH3K1_HUMAN_156	K.ELSphosGESDELGISQDEQLSK.S	K.ELSphosGESDELGISQDEQLSK.S	-1.34537	1.95339	1	1	sp|Q96B97|SH3K1_HUMAN	STYX	Q1	1	1	0.599	0.993	NGKTGMFPSNFIKELSGESDELGISQDEQLS
sp|Q86UP2|KTN1_HUMAN_107 108 109 110_C	K.LSDALAVEDDQVAPVPLNVVE(TSSS)phosVR.E	K.LSDALAVEDDQVAPVPLNVVE(TSSS)phosVR.E	-1.34537	-1.64565	1	1	sp|Q86UP2|KTN1_HUMAN	STYX	Q4	1	1	0.998	0.998	VEDDQVAPVPLNVVETSSSVRERKKKEKKQK EDDQVAPVPLNVVETSSSVRERKKKEKKQKP DDQVAPVPLNVVETSSSVRERKKKEKKQKPV DQVAPVPLNVVETSSSVRERKKKEKKQKPVL
sp|Q96JG9|ZN469_HUMAN_25 26_C	R.QVA(SS)phosPGHPSQPPLEDNTPATR.T	R.QVA(SS)phosPGHPSQPPLEDNTPATR.T	-1.34537	-0.990445	1	2	sp|Q96JG9|ZN469_HUMAN	STYX	Q4	0.9999	0.9999	0.998	0.998	PPPTMTGDLQPRQVASSPGHPSQPPLEDNTP PPTMTGDLQPRQVASSPGHPSQPPLEDNTPA
sp|O43491|E41L2_HUMAN_647	K.HQASphosISELKR.N	K.HQASphosISELKR.N	-1.34537	-0.274236	2	2	sp|O43491|E41L2_HUMAN	STYX	NR	0.9998	0.9999	0.987	0.985	EELDKAQEDILKHQASISELKRNFMESTPEP
sp|Q12830|BPTF_HUMAN_1673	K.KVTSSphosPITSEEESNLSNDFIDENGLPINK.N	K.KVTSSphosPITSEEESNLSNDFIDENGLPINK.N	-1.34537	0.332981	1	2	sp|Q12830|BPTF_HUMAN	STYX	NR	0.9932	0.9987	0.941	0.966	EDMEIETSEVKKVTSSPITSEEESNLSNDFI
sp|Q96JQ2|CLMN_HUMAN_920 921_C	R.(SS)phosESDHFSYVQLR.N	R.(SS)phosESDHFSYVQLR.N	-1.34537	0.0997818	15	19	sp|Q96JQ2|CLMN_HUMAN	STYX	NR	1	1	0.998	0.998	SHSDSSIYLRRHTHRSSESDHFSYVQLRNAA HSDSSIYLRRHTHRSSESDHFSYVQLRNAAD
sp|Q96ST2|IWS1_HUMAN_438	K.TIASphosDSEEEAGK.E	K.TIASphosDSEEEAGK.E	-1.34537	0.24721	5	14	sp|Q96ST2|IWS1_HUMAN	STYX	NR	0.9999	1	0.992	0.993	DAVSDKSGKREKTIASDSEEEAGKELSDKKN
sp|Q8IZA0|K319L_HUMAN_978	K.ILDATDQESphosLELKPTSR.A	K.ILDATDQESphosLELKPTSR.A	-1.33359	-0.171856	2	2	sp|Q8IZA0|K319L_HUMAN	STYX	NR	0.9999	1	0.98	0.998	KRKSKYKILDATDQESLELKPTSRAGIKQKG
sp|Q9Y4E8|UBP15_HUMAN_225 226 229_C	R.GP(ST)phosPKSphosPGASNFSTLPK.L	R.GP(ST)phosPKSphosPGASNFSTLPK.L	-1.33359	0.00145835	2	4	sp|Q9Y4E8|UBP15_HUMAN	STYX	NR	0.9583	0.9865	1.026	1.245	VIEQKNEDGTWPRGPSTPKSPGASNFSTLPK IEQKNEDGTWPRGPSTPKSPGASNFSTLPKI KNEDGTWPRGPSTPKSPGASNFSTLPKISPS
sp|Q8N6H7|ARFG2_HUMAN_319	R.SSVSHSphosVLSEMQVIEQETPVSAK.S	R.SSVSHSphosVLSEMQVIEQETPVSAK.S	-1.32681	0.255577	2	1	sp|Q8N6H7|ARFG2_HUMAN	STYX	NR	0.9982	0.9981	0.849	0.801	ERLGMGLVSRSSVSHSVLSEMQVIEQETPVS
sp|Q9UHB7|AFF4_HUMAN_528	K.ETSSATphosPGRDSK.T	K.ETSSATphosPGR.D	-1.32296	0.579775	4	1	sp|Q9UHB7|AFF4_HUMAN	STYX	Q1	0.9987	0.998	0.997	0.993	NSYTDTSGPKETSSATPGRDSKTIQKGSESG
tr|E7EV07|E7EV07_HUMAN_518	K.YVLSEESKSphosPTR.A	K.YVLSEESKSphosPTR.A	-1.32248	-0.0995685	2	6	tr|E7EV07|E7EV07_HUMAN	STYX	NR	0.9968	1	0.98	0.991	TSNYTSKYVLSEESKSPTRAKFPRQPSSEGT
sp|Q9H7N4|SFR19_HUMAN_936	R.SGGGSGGSphosGGQVSLKK.S	R.SGGGSGGSphosGGQVSLK.K	-1.31985	0.0997818	2	1	sp|Q9H7N4|SFR19_HUMAN	STYX	NR	1	1	0.996	0.996	SKTRKKVRSGGGSGGSGGQVSLKKSKADSCS
sp|O60238|BNI3L_HUMAN_166	R.SVSphosLSMR.K	R.SVSphosLSMR.K	-1.3189	0.671273	4	2	sp|O60238|BNI3L_HUMAN	STYX	Q1	0.9975	0.9993	0.993	0.993	IPPKEFHFRHPKRSVSLSMRKSGAMKKGGIF
sp|O75683|SURF6_HUMAN_206	K.VEVSphosEDEPASK.A	R.EPPGLIFNKVEVSphosEDEPASK.A	-1.3189	1.41664	1	6	sp|O75683|SURF6_HUMAN	STYX	Q1	0.9971	1	0.997	0.997	EPREPPGLIFNKVEVSEDEPASKAQRRKEKR
sp|Q13576|IQGA2_HUMAN_16	R.YGSphosIVDDER.L	R.YGSphosIVDDER.L	-1.3189	0.466564	3	5	sp|Q13576|IQGA2_HUMAN	STYX	Q1	0.9997	1	0.985	0.99	MPHEELPSLQRPRYGSIVDDERLSAEEMDER
sp|Q16204|CCDC6_HUMAN_352	R.TVSSphosPIPYTPSPSSSRPISPGLSYASHTVGFTPPTSLTR.A	R.TVSSphosPIPYTPSPSSSR.P	-1.3189	0.436817	1	3	sp|Q16204|CCDC6_HUMAN	STYX	Q1	0.9857	0.9918	0.945	0.967	FNEMSAQGLRPRTVSSPIPYTPSPSSSRPIS
sp|Q9ULD9|ZN608_HUMAN_963 964_C	K.A(SS)phosPSDIISSK.D	R.SKA(SS)phosPSDIISSK.D	-1.3189	0.551553	1	2	sp|Q9ULD9|ZN608_HUMAN	STYX	Q1	0.9911	0.9873	0.859	0.99	DGGSDSRSEGMRSKASSPSDIISSKDSVVKG GGSDSRSEGMRSKASSPSDIISSKDSVVKGH
sp|Q9Y4W2|LAS1L_HUMAN_523	Q.SGENSLVQEGSEASphosPIGK.S	R.ICSIYTQSGENSLVQEGSEASphosPIGK.S	-1.3189	0.709835	3	1	sp|Q9Y4W2|LAS1L_HUMAN	STYX	Q1	1	1	0.995	0.994	TQSGENSLVQEGSEASPIGKSPYTLDSLYWS
sp|Q86XA9|HTR5A_HUMAN_1704	K.LTGSphosPGVK.A	K.LTGSphosPGVK.A	-1.3189	-0.543284	1	2	sp|Q86XA9|HTR5A_HUMAN	STYX	Q4	0.9986	0.9912	0.984	0.991	ILVRQLPELNPKLTGSPGVKATKPQILLEDG
sp|Q8N4C8|MINK1_HUMAN_601	R.SQSphosLQDQPTR.N	R.SQSphosLQDQPTR.N	-1.3189	-0.533469	1	2	sp|Q8N4C8|MINK1_HUMAN	STYX	Q4	0.9982	0.9999	0.972	0.995	RVPLKPYAAPVPRSQSLQDQPTRNLAAFPAS
sp|O14681|EI24_HUMAN_46	R.RASphosSVLAQR.R	R.RASphosSVLAQR.R	-1.3189	0.221088	3	3	sp|O14681|EI24_HUMAN	STYX	NR	0.9982	1	0.95	0.957	ARIQQKREEQRRRRASSVLAQRRAQSIERKQ
sp|O75152|ZC11A_HUMAN_338	R.LGMSphosADPDNEDATDKVNK.V	R.LGMSphosADPDNEDATDKVNK.V	-1.3189	0.232676	1	1	sp|O75152|ZC11A_HUMAN	STYX	NR	0.9995	1	0.995	0.998	KKAQVSKSLKERLGMSADPDNEDATDKVNKV
sp|P06396|GELS_HUMAN_386	K.QTQVSVLPEGGETphosPLFK.Q	K.QTQVSVLPEGGETphosPLFK.Q	-1.3189	-0.0537826	1	2	sp|P06396|GELS_HUMAN	STYX	NR	0.9996	0.9999	0.986	0.985	YPKQTQVSVLPEGGETPLFKQFFKNWRDPDQ
sp|P49790|NU153_HUMAN_619	K.SPGFASphosPK.L	K.SPGFASphosPK.L	-1.3189	-0.19245	7	4	sp|P49790|NU153_HUMAN	STYX	NR	0.9997	0.9999	0.998	0.997	KEGSVLDILKSPGFASPKIDSVAAQPTATSP
sp|Q7Z5J4|RAI1_HUMAN_472	K.NLVSRTphosPEQHK.S	K.NLVSRTphosPEQHK.S	-1.3189	-0.218465	1	2	sp|Q7Z5J4|RAI1_HUMAN	STYX	NR	0.9818	0.9995	0.968	0.977	AAVPQKKGVKNLVSRTPEQHKSQHCSPEGSG
sp|Q9NZJ4|SACS_HUMAN_2511	R.YASphosNVCFTTLGTEFGQK.E	R.YASphosNVCFTTLGTEFGQK.E	-1.3189	0.322174	1	3	sp|Q9NZJ4|SACS_HUMAN	STYX	NR	1	1	0.993	0.995	LGAVPKRHKALERYASNVCFTTLGTEFGQKE
sp|Q5T8I3|F102B_HUMAN_288	K.QDSphosVESQLK.R	R.CPVKQDSphosVESQLK.R	-1.31178	0.191692	6	6	sp|Q5T8I3|F102B_HUMAN	STYX	NR	1	1	0.997	0.996	DTASEKLSRCPVKQDSVESQLKRVDDTRVDA
sp|Q9C0H9|SRCN1_HUMAN_987	R.RGSphosDELTVPR.Y	R.RGSphosDELTVPR.Y	-1.30731	0.00810676	8	8	sp|Q9C0H9|SRCN1_HUMAN	STYX	NR	0.9998	1	0.998	0.996	GQKAAPRTEPSGRRGSDELTVPRYRTEKPSK
sp|Q9BYJ9|YTHD1_HUMAN_182	P.GMNSphosLEQGMVGLK.L	K.APGMNSphosLEQGMVGLK.L	-1.3059	-0.356918	16	2	sp|Q9BYJ9|YTHD1_HUMAN	STYX	Q4	1	1	1	1	PGFHSDTLSKAPGMNSLEQGMVGLKIGDVSS
sp|O14681|EI24_HUMAN_46 47_C	R.RA(SS)phosVLAQR.R	R.RA(SS)phosVLAQR.R	-1.3059	0.215247	6	12	sp|O14681|EI24_HUMAN	STYX	NR	0.9996	0.9999	1	1	ARIQQKREEQRRRRASSVLAQRRAQSIERKQ RIQQKREEQRRRRASSVLAQRRAQSIERKQE
sp|Q96DR7|ARHGQ_HUMAN_222	R.LPSphosQENELLENPSVVLSTNSPAALK.V	R.LPSphosQENELLENPSVVLSTNSPAALK.V	-1.30077	-0.583361	4	5	sp|Q96DR7|ARHGQ_HUMAN	STYQ	Q4	1	1	0.997	0.997	QKSSSEQKLPLQRLPSQENELLENPSVVLST
sp|Q09666|AHNK_HUMAN_1042	K.VDTNAPDLSphosLEGPEGK.L	K.VDTNAPDLSphosLEGPEGK.L	-1.29868	0.197629	2	3	sp|Q09666|AHNK_HUMAN	STYX	NR	1	1	0.998	0.998	VDISAPKVDTNAPDLSLEGPEGKLKGPKFKM
sp|Q15648|MED1_HUMAN_588	R.HESphosVGHGEDFSK.V	R.HESphosVGHGEDFSK.V	-1.29659	0.636782	2	2	sp|Q15648|MED1_HUMAN	STYX	Q1	0.9999	1	0.996	0.995	TTLFNMSMSIKDRHESVGHGEDFSKVSQNPI
sp|Q92576|PHF3_HUMAN_1758	R.RGSphosAVATSHFEVGNTCPSEFPSK.S	R.RGSphosAVATSHFEVGNTCPSEFPSK.S	-1.29659	0.533678	4	5	sp|Q92576|PHF3_HUMAN	STYX	Q1	1	1	0.993	0.997	ILMQNIETVHPFRRGSAVATSHFEVGNTCPS
sp|O14686|KMT2D_HUMAN_654	R.LSphosPLPVVSR.L	R.LSphosPLPVVSR.L	-1.29544	-0.103752	2	3	sp|O14686|KMT2D_HUMAN	STYX	NR	0.9909	0.9997	0.979	0.998	PEESPMSPPPEVSRLSPLPVVSRLSPPPEES
sp|Q8NCN4|RN169_HUMAN_339	R.CVSphosAPDLTIEK.R	R.CVSphosAPDLTIEK.R	-1.29313	0.466431	10	8	sp|Q8NCN4|RN169_HUMAN	STYX	Q1	1	1	0.998	0.999	PIIGVLLSTQNNRCVSAPDLTIEKRLPFSSL
sp|O95402|MED26_HUMAN_361	K.AGLSphosPAEPLLSR.A	K.AGLSphosPAEPLLSR.A	-1.2929	0.37017	7	12	sp|O95402|MED26_HUMAN	STYX	Q1	0.9997	0.9998	0.998	0.998	ESHQRLAGPGCKAGLSPAEPLLSRAGFSPDS
sp|Q05D32|CTSL2_HUMAN_165	K.NGTSGSDSphosPGQAVEAEEIVK.Q	K.NGTSGSDSphosPGQAVEAEEIVK.Q	-1.2929	0.396175	3	7	sp|Q05D32|CTSL2_HUMAN	STYX	Q1	1	1	0.996	0.996	NFFSPANKNGTSGSDSPGQAVEAEEIVKQLD
sp|Q12888|TP53B_HUMAN_398	R.QDKPMDTSVLSphosEEGGEPFQK.K	R.QDKPMDTSVLSphosEEGGEPFQKK.L	-1.2929	0.396175	11	24	sp|Q12888|TP53B_HUMAN	STYX	Q1	1	1	0.998	0.998	EQEGRQDKPMDTSVLSEEGGEPFQKKLQSGE
sp|Q5VZK9|CARL1_HUMAN_1288	R.TASRPDDIPDSphosPSSPK.V	R.TASRPDDIPDSphosPSSPK.V	-1.2929	0.561513	1	1	sp|Q5VZK9|CARL1_HUMAN	STYX	Q1	0.9994	0.9997	0.994	0.985	PQKPRTASRPDDIPDSPSSPKVALLPPVLKK
sp|Q9BX63|FANCJ_HUMAN_226	K.QGNSphosQESSNTIK.K	K.QGNSphosQESSNTIK.K	-1.2929	1.75473	5	1	sp|Q9BX63|FANCJ_HUMAN	STYQ	Q1	1	0.9989	0.997	0.995	PGHCSRCCCSTKQGNSQESSNTIKKDHTGKS
sp|Q09666|AHNK_HUMAN_1298	K.VDVEVPDVSphosLEGPEGK.L	K.VDVEVPDVSphosLEGPEGK.L	-1.2929	-0.730998	6	2	sp|Q09666|AHNK_HUMAN	STYX	Q4	0.9998	0.9993	1	1	IDVSGPKVDVEVPDVSLEGPEGKLKGPKFKM
sp|P00533|EGFR_HUMAN_1036 1037_C	R.TPLL(SS)phosLSATSNNSTVACIDR.N	R.TPLL(SS)phosLSATSNNSTVACIDR.N	-1.2929	0.209406	1	1	sp|P00533|EGFR_HUMAN	STYX	NR	0.9943	0.9311	0.259	0.256	QGFFSSPSTSRTPLLSSLSATSNNSTVACID GFFSSPSTSRTPLLSSLSATSNNSTVACIDR
sp|P49792|RBP2_HUMAN_1449 1450_C	K.SG(SS)phosFVHQASFK.F	K.SG(SS)phosFVHQASFK.F	-1.2929	-0.256556	1	4	sp|P49792|RBP2_HUMAN	STYX	NR	0.9986	1	0.519	0.995	RCIACQNTKSANKSGSSFVHQASFKFGQGDL CIACQNTKSANKSGSSFVHQASFKFGQGDLP
sp|Q15648|MED1_HUMAN_1223	K.AKSphosPISSGSGGSHMSGTSSSSGMK.S	K.AKSphosPISSGSGGSHMSGTSSSSGMK.S	-1.2929	-0.241255	1	1	sp|Q15648|MED1_HUMAN	STYX	NR	0.9747	0.9944	0.999	0.997	PMKPVPGTPPSSKAKSPISSGSGGSHMSGTS
sp|Q6NZI2|CAVN1_HUMAN_302	K.SFTphosPDHVVYAR.S	K.SFTphosPDHVVYAR.S	-1.2929	0.0613077	1	3	sp|Q6NZI2|CAVN1_HUMAN	STYX	NR	0.9774	1	0.692	0.992	REKLKTSRDKLRKSFTPDHVVYARSKTAVYK
sp|Q8TB36|GDAP1_HUMAN_11	R.QEEQRGSphosPPLR.A	R.QEEQRGSphosPPLR.A	-1.2929	-0.165254	3	4	sp|Q8TB36|GDAP1_HUMAN	STYX	NR	0.9953	0.9994	1	1	_____MAERQEEQRGSPPLRAEGKADAEVKL
sp|Q8TEW0|PARD3_HUMAN_715	R.RISphosHSLYSGIEGLDESPSR.N	R.RISphosHSLYSGIEGLDESPSR.N	-1.2929	0.197629	3	5	sp|Q8TEW0|PARD3_HUMAN	STYX	NR	1	1	0.996	0.997	ELPIETALDDRERRISHSLYSGIEGLDESPS
sp|Q99986|VRK1_HUMAN_342	K.AIGSKDDGKLDLSphosVVENGGLK.A	K.DDGKLDLSphosVVENGGLK.A	-1.2929	0.197629	1	1	sp|Q99986|VRK1_HUMAN	STYX	NR	0.9999	0.9999	0.973	1	GLKAIGSKDDGKLDLSVVENGGLKAKTITKK
sp|O43719|HTSF1_HUMAN_676	K.LFEESphosDDKEDEDADGKEVEDADEK.L	K.LFEESphosDDKEDEDADGKEVEDADEK.L	-1.28992	0.112382	2	19	sp|O43719|HTSF1_HUMAN	STYX	NR	1	1	1	1	KKAEEGDADEKLFEESDDKEDEDADGKEVED
sp|Q5VWJ9|SNX30_HUMAN_40	R.DMPHPLAGSSSEEAVGGDSTPSphosPDLLMAR.S	R.DMPHPLAGSSSEEAVGGDSTPSphosPDLLMAR.S	-1.28558	-1.44771	2	1	sp|Q5VWJ9|SNX30_HUMAN	STYX	Q4	0.9991	1	0.996	0.993	AGSSSEEAVGGDSTPSPDLLMARSFGDKDLI
sp|Q9H981|ARP8_HUMAN_412	R.SphosQGDPEDPHDEHYLLATQSK.Q	R.SphosQGDPEDPHDEHYLLATQSK.Q	-1.28467	0.987991	2	9	sp|Q9H981|ARP8_HUMAN	STYQ	Q1	1	1	0.996	0.998	TFGIVGQKMTTLQHRSQGDPEDPHDEHYLLA
sp|Q9BWG4|SSBP4_HUMAN_355	K.SSPGAVAGLSNAPGTphosPR.D	K.SSPGAVAGLSNAPGTphosPR.D	-1.28285	0.380549	2	8	sp|Q9BWG4|SSBP4_HUMAN	STYX	Q1	1	1	0.976	0.996	KSSPGAVAGLSNAPGTPRDDGEMAAAGTFLH
sp|Q9UQ35|SRRM2_HUMAN_1257 1258_C	K.SEEPAGQILSHL(SS)phosELK.E	K.SEEPAGQILSHL(SS)phosELK.E	-1.28172	0.363038	2	8	sp|Q9UQ35|SRRM2_HUMAN	STYX	Q1	1	1	0.888	0.998	VEKSEEPAGQILSHLSSELKEMSTSNFESSP EKSEEPAGQILSHLSSELKEMSTSNFESSPE
sp|Q8NHG8|ZNRF2_HUMAN_135	R.DRPVGGSphosPGGPR.L	R.DRPVGGSphosPGGPR.L	-1.26937	-0.0337363	8	10	sp|Q8NHG8|ZNRF2_HUMAN	STYX	NR	0.9997	1	1	1	SPEDGGGGRDRPVGGSPGGPRLVIGSLPAHL
sp|Q9Y2L1|RRP44_HUMAN_215	R.LACLSphosEEGNEIESGK.L	R.LACLSphosEEGNEIESGK.L	-1.26937	0.0482515	4	5	sp|Q9Y2L1|RRP44_HUMAN	STYX	NR	0.9998	1	0.998	0.998	SLTANPELIDRLACLSEEGNEIESGKIIFSE
sp|P23396|RS3_HUMAN_35	R.ELAEDGYSphosGVEVR.V	R.ELAEDGYSphosGVEVR.V	-1.26759	0.486028	2	2	sp|P23396|RS3_HUMAN	STYX	Q1	0.9997	1	0.913	0.945	ELNEFLTRELAEDGYSGVEVRVTPTRTEIII
sp|P55196|AFAD_HUMAN_512	R.SphosVDGGLMVK.G	R.SphosVDGGLMVK.G	-1.26759	0.00835882	2	1	sp|P55196|AFAD_HUMAN	STYX	NR	0.9994	0.9994	1	1	FKFVDPSQDHALAKRSVDGGLMVKGPRHKPG
sp|Q92766|RREB1_HUMAN_1167	R.ANSphosGGVDLDSSGEFASIEK.M	R.ANSphosGGVDLDSSGEFASIEK.M	-1.26759	-0.179254	10	10	sp|Q92766|RREB1_HUMAN	STYX	NR	1	1	0.999	0.999	KRGRKRGMRSRPRANSGGVDLDSSGEFASIE
sp|O95155|UBE4B_HUMAN_103	R.SphosQSMDIDGVSCEK.S	R.SphosQSMDIDGVSCEK.S	-1.26737	3.24451	1	2	sp|O95155|UBE4B_HUMAN	STYQ	Q1	1	1	0.536	0.931	SPSNSLETQSQSLSRSQSMDIDGVSCEKSMS
sp|P16591|FER_HUMAN_714	R.QEDGGVYphosSSSGLK.Q	R.QEDGGVYphosSSSGLK.Q	-1.26737	0.896248	3	5	sp|P16591|FER_HUMAN	STYX	Q1	1	1	0.981	0.982	KISDFGMSRQEDGGVYSSSGLKQIPIKWTAP
sp|Q6KC79|NIPBL_HUMAN_588 591 592 599_C	K.QCNDAPVSVLQEDIVGSphosLK(ST)phosPENHPETphosPK.K	K.QCNDAPVSVLQEDIVGSphosLK(ST)phosPENHPETphosPK.K	-1.26737	1.28926	1	3	sp|Q6KC79|NIPBL_HUMAN	STYX	Q1	0.9659	0.9998	0.99	0.988	CNDAPVSVLQEDIVGSLKSTPENHPETPKKK APVSVLQEDIVGSLKSTPENHPETPKKKSDP PVSVLQEDIVGSLKSTPENHPETPKKKSDPE DIVGSLKSTPENHPETPKKKSDPELSKSEMK
sp|Q9P246|STIM2_HUMAN_626	R.KISphosRDEVSLEDSSR.G	R.KISphosRDEVSLEDSSR.G	-1.26737	0.354355	4	12	sp|Q9P246|STIM2_HUMAN	STYX	Q1	1	1	0.996	0.998	PLSLEIYQTLSPRKISRDEVSLEDSSRGDSP
sp|O75400|PR40A_HUMAN_36 37_C	R.RLSG(SS)phosLCSGSWVSADGFLR.R	R.RLSG(SS)phosLCSGSWVSADGFLR.R	-1.26737	-0.429327	3	1	sp|O75400|PR40A_HUMAN	STYX	Q4	0.9868	0.9896	0.943	0.666	PPSQGPGDGERRLSGSSLCSGSWVSADGFLR PSQGPGDGERRLSGSSLCSGSWVSADGFLRR
sp|P43243|MATR3_HUMAN_275 276_C	R.GAPP(SS)phosNIEDFHGLLPK.G	R.GAPP(SS)phosNIEDFHGLLPK.G	-1.26737	-1.44771	1	1	sp|P43243|MATR3_HUMAN	STYX	Q4	0.9768	1	1	1	LQERSLFEKKRGAPPSSNIEDFHGLLPKGYP QERSLFEKKRGAPPSSNIEDFHGLLPKGYPH
sp|Q02241|KIF23_HUMAN_155	K.SphosNDRNSMDIQCEVDALLER.Q	K.SphosNDRNSMDIQCEVDALLER.Q	-1.26737	-1.20955	1	1	sp|Q02241|KIF23_HUMAN	STYX	Q4	0.9998	0.999	0.698	0.5	FNSIGSFQAKRYVFKSNDRNSMDIQCEVDAL
sp|Q12955|ANK3_HUMAN_959	R.EFDSDSphosLR.H	R.EFDSDSphosLR.H	-1.26737	0.173782	3	2	sp|Q12955|ANK3_HUMAN	STYX	NR	0.9989	0.9998	0.978	0.965	SKEQHLTFTREFDSDSLRHYSWAADTLDNVN
sp|Q8IX01|SUGP2_HUMAN_603	R.VIEGSLSphosPK.E	K.RVIEGSLSphosPK.E	-1.26737	-0.0606828	1	1	sp|Q8IX01|SUGP2_HUMAN	STYX	NR	0.996	0.9954	0.798	0.996	GTIDQLVKRVIEGSLSPKERTLLKEDPAYWF
sp|Q8WY36|BBX_HUMAN_159	K.WCPTTNKPVKSphosPTPTVNPR.K	K.SphosPTPTVNPR.K	-1.26737	0.255577	3	12	sp|Q8WY36|BBX_HUMAN	STYX	NR	0.9962	0.9999	0.98	0.991	NPGYKWCPTTNKPVKSPTPTVNPRKKLWAFP
sp|Q96D71|REPS1_HUMAN_186	R.HPSphosGGNSERPLAGPGPFWSPFGEAQ.S	R.HPSphosGGNSERPLAGPGPF.W	-1.26737	0.197629	7	5	sp|Q96D71|REPS1_HUMAN	STYX	NR	1	0.9971	0.964	0.984	PPTSPHTWRKHSRHPSGGNSERPLAGPGPFW
sp|Q9H4Z3|CAPAM_HUMAN_116	R.QLSphosEEQPSGNGVK.K	R.QLSphosEEQPSGNGVK.K	-1.26737	0.244172	3	15	sp|Q9H4Z3|CAPAM_HUMAN	STYX	NR	0.998	1	0.997	0.998	VETPPAENKPRKRQLSEEQPSGNGVKKPKIE
sp|Q9P2P5|HECW2_HUMAN_48	R.ANSphosDTDLVTSESR.S	R.ANSphosDTDLVTSESR.S	-1.25745	-0.0227991	2	2	sp|Q9P2P5|HECW2_HUMAN	STYX	NR	1	1	0.98	0.992	AQSSMPENMTLQRANSDTDLVTSESRSSLTA
sp|O95049|ZO3_HUMAN_591	R.SphosREDLSALTR.Q	R.SphosREDLSALTR.Q	-1.25613	0.137257	10	7	sp|O95049|ZO3_HUMAN	STYX	NR	0.9999	1	0.998	0.997	RLRGLRRGAKKTTQRSREDLSALTRQGRYPP
sp|O43491|E41L2_HUMAN_87	K.QKSphosYTLVVAK.D	K.QKSphosYTLVVAK.D	-1.25526	-0.0899015	2	2	sp|O43491|E41L2_HUMAN	STYX	NR	0.9937	0.9977	0.94	0.959	RGISRFIPPWLKKQKSYTLVVAKDGGDKKEP
sp|P43243|MATR3_HUMAN_195	R.RDSFDDRGPSphosLNPVLDYDHGSR.S	R.RDSFDDRGPSphosLNPVLDYDHGSR.S	-1.24917	0.364924	2	3	sp|P43243|MATR3_HUMAN	STYX	Q1	1	1	0.836	0.67	EKRHFRRDSFDDRGPSLNPVLDYDHGSRSQE
sp|O14497|ARI1A_HUMAN_1204	K.RNSphosMTPNPGYQPSMNTSDMMGR.M	R.NSphosMTPNPGYQPSMNTSDMMGR.M	-1.24228	0.364578	3	6	sp|O14497|ARI1A_HUMAN	STYX	Q1	1	1	0.948	0.985	DAFNDGSDSTFQKRNSMTPNPGYQPSMNTSD
sp|P36404|ARL2_HUMAN_45	K.FNGEDIDTISphosPTLGFNIK.T	K.KFNGEDIDTISphosPTLGFNIK.T	-1.24228	0.693157	1	1	sp|P36404|ARL2_HUMAN	STYX	Q1	1	1	0.977	0.993	TTILKKFNGEDIDTISPTLGFNIKTLEHRGF
sp|Q8WXE1|ATRIP_HUMAN_518	R.LSphosDGDMTSALR.G	R.SLVHRLSphosDGDMTSALR.G	-1.24228	0.338344	23	26	sp|Q8WXE1|ATRIP_HUMAN	STYX	Q1	0.9999	1	0.996	0.997	DSAAGEGNRSLVHRLSDGDMTSALRGVADDQ
sp|O95425|SVIL_HUMAN_1120	K.TPTGEGLLDSphosPSK.T	K.TPTGEGLLDSphosPSK.T	-1.24228	-0.393258	1	1	sp|O95425|SVIL_HUMAN	STYX	Q4	1	0.9977	0.993	0.985	AAGEIKTPTGEGLLDSPSKTMSIKERLALLK
sp|O00257|CBX4_HUMAN_434	R.SISphosTPTCLGGSPAAER.P	R.SISphosTPTCLGGSPAAER.P	-1.24228	0.0870708	1	1	sp|O00257|CBX4_HUMAN	STYX	NR	0.974	1	0.984	0.991	GEREPCKKRLTARSISTPTCLGGSPAAERPA
sp|O60437|PEPL_HUMAN_16	K.GKYSPTphosVQTR.S	K.GKYSPTphosVQTR.S	-1.24228	0.205726	1	2	sp|O60437|PEPL_HUMAN	STYX	NR	0.997	0.9951	0.559	0.831	MNSLFRKRNKGKYSPTVQTRSISNKELSELI
sp|P14859|PO2F1_HUMAN_269 270_C	R.TIAATPIQTLPQSQ(ST)phosPK.R	R.TIAATPIQTLPQSQ(ST)phosPK.R	-1.24228	0.0350762	8	1	sp|P14859|PO2F1_HUMAN	STYX	NR	0.9998	1	0.994	0.993	RTIAATPIQTLPQSQSTPKRIDTPSLEEPSD TIAATPIQTLPQSQSTPKRIDTPSLEEPSDL
sp|Q13557|KCC2D_HUMAN_333	K.ESTESphosSNTTIEDEDVK.A	K.ESTESphosSNTTIEDEDVK.A	-1.24228	0.209406	5	3	sp|Q13557|KCC2D_HUMAN	STYX	NR	0.9978	0.9982	0.982	0.983	KSLLKKPDGVKESTESSNTTIEDEDVKARKQ
sp|Q6P4R8|NFRKB_HUMAN_298	R.KGSphosLAALYDLA.V	R.KGSphosLAALYDLAVLK.K	-1.24228	-0.265526	18	20	sp|Q6P4R8|NFRKB_HUMAN	STYX	NR	1	1	0.999	0.998	TLNDIMTRVNAGRKGSLAALYDLAVLKKKVK
sp|Q8NCN4|RN169_HUMAN_693	R.KGSphosVDQYLLR.S	R.KGSphosVDQYLLR.S	-1.24228	-0.178519	5	7	sp|Q8NCN4|RN169_HUMAN	STYX	NR	0.9999	1	0.996	0.997	RMFDNERRTVSRRKGSVDQYLLRSSNMAGAK
sp|Q8NFC6|BD1L1_HUMAN_2501	R.GLEGNANSphosPAHLR.G	R.GLEGNANSphosPAHLR.G	-1.24228	0.0613077	10	7	sp|Q8NFC6|BD1L1_HUMAN	STYX	NR	1	1	1	1	TASYSAGRGLEGNANSPAHLRGPEQTSGQTA
sp|Q92733|PRCC_HUMAN_241	K.TSSLAPVVGTTTTTPSphosPSAIK.A	K.TSSLAPVVGTTTTTPSphosPSAIK.A	-1.24228	-0.129296	3	8	sp|Q92733|PRCC_HUMAN	STYX	NR	0.9988	0.9994	0.989	0.991	TSSLAPVVGTTTTTPSPSAIKAAAKSAALQV
sp|Q9UPN6|SCAF8_HUMAN_779 780_C	K.VPHLIDHQI(SS)phosGENTR.S	H.LIDHQI(SS)phosGENTR.S	-1.24228	-0.273677	1	1	sp|Q9UPN6|SCAF8_HUMAN	STYX	NR	0.9974	0.9772	0.996	0.995	AEPEEKVPHLIDHQISSGENTRSVIPNDISS EPEEKVPHLIDHQISSGENTRSVIPNDISSN
sp|Q12888|TP53B_HUMAN_919	K.EGDIIPPLTphosGATPPLIGHLK.L	K.EGDIIPPLTphosGATPPLIGHLK.L	-1.24185	1.14953	4	7	sp|Q12888|TP53B_HUMAN	STYX	Q1	1	1	0.728	0.784	FHFTLPKEGDIIPPLTGATPPLIGHLKLEPK
sp|P98175|RBM10_HUMAN_709 710_C	R.QH(TS)phosMDLPK.L	R.QH(TS)phosMDLPK.L	-1.23992	0.221088	2	3	sp|P98175|RBM10_HUMAN	STYX	NR	0.9712	0.9986	1	1	YAILEKKGALAERQHTSMDLPKLASDDRPSP AILEKKGALAERQHTSMDLPKLASDDRPSPP
sp|Q66K74|MAP1S_HUMAN_592 595	R.CGEASphosPPSphosAACGSPASQLVATPSLELGPIPAGEEK.A	R.CGEASphosPPSphosAACGSPASQLVATPSLELGPIPAGEEK.A	-1.238	0.112382	2	7	sp|Q66K74|MAP1S_HUMAN	STYX	NR	0.9846	0.9877	0.856	0.499	ANGPRSPPSLRCGEASPPSAACGSPASQLVA PRSPPSLRCGEASPPSAACGSPASQLVATPS
sp|Q96PC5|MIA2_HUMAN_1204	R.APSDTGSLSphosPPWDQDRR.M	R.APSDTGSLSphosPPWDQDRR.M	-1.2346	-0.163253	2	7	sp|Q96PC5|MIA2_HUMAN	STYX	NR	0.9999	1	0.927	0.994	RLTDPHRAPSDTGSLSPPWDQDRRMMFPPPG
sp|Q12888|TP53B_HUMAN_639	R.SEALSphosSVLDQEEAMEIK.E	R.SEALSphosSVLDQEEAMEIK.E	-1.23248	0.419709	6	2	sp|Q12888|TP53B_HUMAN	STYX	Q1	1	1	0.977	0.932	GSQAVPSPATRSEALSSVLDQEEAMEIKEHH
sp|Q7Z2K8|GRIN1_HUMAN_993	R.ALLQSphosVR.R	R.ALLQSphosVR.R	-1.23037	-1.60796	2	2	sp|Q7Z2K8|GRIN1_HUMAN	STYX	Q4	0.9988	0.9969	1	1	GAAKRPPGLFRALLQSVRRPRCCSRAGPTAE
sp|Q9BQ39|DDX50_HUMAN_683	R.SGWSphosSGR.S	R.SGWSphosSGR.S	-1.22995	0.994812	2	2	sp|Q9BQ39|DDX50_HUMAN	STYX	Q1	0.9722	0.9426	0.978	0.967	YDGNTSSNSRQRSGWSSGRSGRSGRSGGRSG
sp|Q9Y388|RBMX2_HUMAN_121	R.APKDSphosEEIDDVTR.Q	R.APKDSphosEEIDDVTR.Q	-1.22995	-0.0326684	2	7	sp|Q9Y388|RBMX2_HUMAN	STYX	NR	0.9995	1	0.998	0.998	TIRVDHVSNYRAPKDSEEIDDVTRQLQEKGC
sp|Q92805|GOGA1_HUMAN_194	K.KEESphosLGKMEQELEAR.T	K.KEESphosLGKMEQELEAR.T	-1.22616	1.93236	2	2	sp|Q92805|GOGA1_HUMAN	STYX	Q1	1	1	1	1	QELSKIKHMLLKKEESLGKMEQELEARTREL
sp|Q6ZRV2|FA83H_HUMAN_1025	R.LSSphosATANALYSSNLR.D	R.LSSphosATANALYSSNLR.D	-1.22616	-0.159029	2	4	sp|Q6ZRV2|FA83H_HUMAN	STYX	NR	1	0.9999	0.994	0.994	TEAATEERGPRARLSSATANALYSSNLRDDT
sp|Q96RG2|PASK_HUMAN_104	R.GSphosVSCCSLLR.G	R.GSphosVSCCSLLR.G	-1.21844	0.283603	2	4	sp|Q96RG2|PASK_HUMAN	STYX	NR	0.9994	0.9998	0.681	0.997	CPAAPEHTDPSEPRGSVSCCSLLRGLSSGWS
sp|P49711|CTCF_HUMAN_717	K.KEPDAEPAEGEEEEAQPAATDAPNGDLTphosPEMILSM.M	K.KEPDAEPAEGEEEEAQPAATDAPNGDLTphosPEMILSMMDR.-	-1.21803	-0.429327	2	1	sp|P49711|CTCF_HUMAN	STYX	Q4	1	1	0.959	0.994	EEAQPAATDAPNGDLTPEMILSMMDR_____
sp|Q10570|CPSF1_HUMAN_765 766_C	R.(SS)phosQPPADRDPAPFR.A	R.R(SS)phosQPPADRDPAPFR.A	-1.21762	1.12487	5	11	sp|Q10570|CPSF1_HUMAN	STYQ	Q1	0.9998	0.9998	1	1	DSGSLFSPSKEEARRSSQPPADRDPAPFRAE SGSLFSPSKEEARRSSQPPADRDPAPFRAEP
sp|Q5VWQ8|DAB2P_HUMAN_1108	R.LMSphosVEEELK.K	R.LMSphosVEEELKK.D	-1.21762	1.18576	7	3	sp|Q5VWQ8|DAB2P_HUMAN	STYX	Q1	0.9998	0.9999	1	1	EDKDIQMKGIISRLMSVEEELKKDHAEMQAA
sp|Q9HCD6|TANC2_HUMAN_1722	R.SQSphosASYYPVCHSK.L	R.SQSphosASYYPVCHSK.L	-1.21762	1.20429	3	4	sp|Q9HCD6|TANC2_HUMAN	STYX	Q1	1	0.9999	0.995	0.995	GGVRYSQTPQIGRSQSASYYPVCHSKLDLER
sp|Q9Y580|RBM7_HUMAN_204	R.MNSphosYPYLADR.H	R.MNSphosYPYLADR.H	-1.21762	1.28922	7	10	sp|Q9Y580|RBM7_HUMAN	STYX	Q1	0.9997	1	0.994	0.995	WRQGTPSSQRKVRMNSYPYLADRHYSREQRY
sp|P46013|KI67_HUMAN_1329	K.LDLTENLTGSphosKR.R	K.LDLTENLTGSphosKR.R	-1.21762	-1.27405	1	2	sp|P46013|KI67_HUMAN	STYX	Q4	1	1	0.87	0.96	GTPVQKLDLTENLTGSKRRPQTPKEEAQALE
sp|P78527|PRKDC_HUMAN_3198	K.IEEKLTphosPLPEDNSMNVDQDGDPSDR.M	K.IEEKLTphosPLPEDNSMNVDQDGDPSDR.M	-1.21762	-0.802371	1	1	sp|P78527|PRKDC_HUMAN	STYX	Q4	0.9989	0.9999	0.991	0.997	ITNRCFFLSKIEEKLTPLPEDNSMNVDQDGD
sp|Q96FV2|SCRN2_HUMAN_50	R.DEVQEVVFVPAGTphosHTPGSR.L	R.DEVQEVVFVPAGTphosHTPGSR.L	-1.21762	-0.469859	1	2	sp|Q96FV2|SCRN2_HUMAN	STYX	Q4	0.9962	1	0.951	0.915	RPRDEVQEVVFVPAGTHTPGSRLQCTYIEVE
sp|Q9ULJ7|ANR50_HUMAN_1248	R.QSIVSPSSTTQSLGQSHNSphosPSSEFEWSQVKPSLK.S	R.QSIVSPSSTTQSLGQSHNSphosPSSEFEWSQVKPSLK.S	-1.21762	-0.71074	1	1	sp|Q9ULJ7|ANR50_HUMAN	STYX	Q4	0.9677	0.9922	0.84	0.94	VSPSSTTQSLGQSHNSPSSEFEWSQVKPSLK
sp|O00444|PLK4_HUMAN_420 421_C	R.SGGGENEER(YS)phosPTDNNANIFNFFK.E	R.SGGGENEER(YS)phosPTDNNANIFNFFK.E	-1.21762	-0.268479	1	2	sp|O00444|PLK4_HUMAN	STYX	NR	0.9885	1	0.514	0.517	LSVSKRSGGGENEERYSPTDNNANIFNFFKE SVSKRSGGGENEERYSPTDNNANIFNFFKEK
sp|O95071|UBR5_HUMAN_2241	R.DLSphosLEVDRDR.D	R.DLSphosLEVDRDR.D	-1.21762	-0.0120252	1	4	sp|O95071|UBR5_HUMAN	STYX	NR	0.981	0.9985	1	1	RREMEKLRNQQSRDLSLEVDRDRDLLIQQTM
sp|P21675|TAF1_HUMAN_1154 1155_C	R.MLLAAGSAASGNNHRDDDTASV(TS)phosLNSSATGR.C	R.DDDTASV(TS)phosLNSSATGR.C	-1.21762	0.0613077	1	1	sp|P21675|TAF1_HUMAN	STYX	NR	0.942	0.9809	0.578	0.664	AASGNNHRDDDTASVTSLNSSATGRCLKIYR ASGNNHRDDDTASVTSLNSSATGRCLKIYRT
sp|P49790|NU153_HUMAN_632	K.IDSVAAQPTATphosSPVVYTRPAISSF.S	K.IDSVAAQPTATphosSPVVYTRPAISSFSSSGIGFGESLK.A	-1.21762	0.144022	3	2	sp|P49790|NU153_HUMAN	STYX	NR	0.9672	0.9983	0.93	0.988	FASPKIDSVAAQPTATSPVVYTRPAISSFSS
sp|P78364|PHC1_HUMAN_862	R.RSSphosSDIAR.A	R.RSSphosSDIAR.A	-1.21762	0.0217793	1	1	sp|P78364|PHC1_HUMAN	STYX	NR	0.9966	0.9995	0.924	0.927	EANYARVRRRGPRRSSSDIARAKIQGKCHRG
sp|Q15061|WDR43_HUMAN_394	K.VRTphosPVMNSEAK.V	K.VRTphosPVMNSEAK.V	-1.21762	0.149535	1	1	sp|Q15061|WDR43_HUMAN	STYX	NR	0.9871	0.9991	0.916	0.994	NCWAPKVETAITKVRTPVMNSEAKVLVPGIP
sp|Q8N3C0|ASCC3_HUMAN_193	K.TISphosLDYK.K	K.TISphosLDYKK.F	-1.21762	0.300315	1	3	sp|Q8N3C0|ASCC3_HUMAN	STYX	NR	0.984	0.9987	0.995	0.993	HFDELPINGETQKTISLDYKKFLNEHLQEAC
sp|Q9H792|PEAK1_HUMAN_587	K.TIPVKSphosPNLSEIK.F	K.TIPVKSphosPNLSEIK.F	-1.21762	-0.273677	1	3	sp|Q9H792|PEAK1_HUMAN	STYX	NR	0.9553	0.9999	0.994	0.983	SPTATNISSKTIPVKSPNLSEIKFNSYNNAG
sp|Q9HCE1|MOV10_HUMAN_977	K.LSPSTSGPHSphosHDYLPQER.E	K.LSPSTSGPHSphosHDYLPQER.E	-1.21762	0.197629	1	3	sp|Q9HCE1|MOV10_HUMAN	STYX	NR	0.9737	0.9976	0.976	0.969	LQGLSKLSPSTSGPHSHDYLPQEREGEGGLS
sp|Q9P270|SLAI2_HUMAN_63	R.AGASIPSSGAASphosPR.G	R.AGASIPSSGAASphosPR.G	-1.21762	-0.0466076	3	3	sp|Q9P270|SLAI2_HUMAN	STYX	NR	0.9991	0.9999	0.993	0.987	SPVRAGASIPSSGAASPRGFPLGLSAKSGGG
sp|Q9UQR0|SCML2_HUMAN_567 568_C	R.NPMYIH(TS)phosVSQDFSR.S	R.NPMYIH(TS)phosVSQDFSR.S	-1.21762	0.0742468	1	1	sp|Q9UQR0|SCML2_HUMAN	STYX	NR	0.9996	0.9979	0.506	0.89	GNYLNPACRNPMYIHTSVSQDFSRSVPGTTS NYLNPACRNPMYIHTSVSQDFSRSVPGTTSS
sp|Q5T0W9|FA83B_HUMAN_869	K.RTPSphosPGPVESK.F	R.TPSphosPGPVESK.F	-1.20855	-0.308406	4	6	sp|Q5T0W9|FA83B_HUMAN	STYX	Q4	0.9986	0.9999	0.985	0.997	SQEINAPPDENKRTPSPGPVESKFLERAGDA
sp|Q8TD43|TRPM4_HUMAN_1102 1103_C	R.SPQP(SS)phosPALEHFR.V	R.SPQP(SS)phosPALEHFR.V	-1.20549	-0.0466076	2	3	sp|Q8TD43|TRPM4_HUMAN	STYX	NR	0.9999	0.9999	1	0.998	LLLRQLCRRPRSPQPSSPALEHFRVYLSKEA LLRQLCRRPRSPQPSSPALEHFRVYLSKEAE
sp|Q8TD26|CHD6_HUMAN_21	K.VLNHSphosPMSDASVNFDYK.S	K.VLNHSphosPMSDASVNFDYK.S	-1.20325	0.266892	2	3	sp|Q8TD26|CHD6_HUMAN	STYX	NR	1	1	0.982	0.996	QKKEKQLSNLKVLNHSPMSDASVNFDYKSPS
sp|Q13263|TIF1B_HUMAN_440	K.QGSGSSphosQPMEVQEGYGFGSGDDPYSSAEPHVSGVK.R	K.QGSGSSphosQPMEVQEGYGFGSGDDPYSSAEPHVSGVK.R	-1.1994	4.16112	4	2	sp|Q13263|TIF1B_HUMAN	STYQ	Q1	0.9985	0.9965	0.983	0.986	PPRAPGPLSKQGSGSSQPMEVQEGYGFGSGD
sp|Q9BQ39|DDX50_HUMAN_82	K.LNGDTEEGFNRLSphosDEFSK.S	K.LNGDTEEGFNRLSphosDEFSK.S	-1.199	-0.629296	2	4	sp|Q9BQ39|DDX50_HUMAN	STYX	Q4	0.9994	0.9998	0.919	0.949	KEKLNGDTEEGFNRLSDEFSKSHKSRRKDLP
sp|Q8N6T3|ARFG1_HUMAN_189	R.YVGFGNTphosPPPQK.K	R.YVGFGNTphosPPPQK.K	-1.19839	-0.689377	10	12	sp|Q8N6T3|ARFG1_HUMAN	STYX	Q4	1	1	0.998	0.998	SYQGAQGNRYVGFGNTPPPQKKEDDFLNNAM
sp|P78347|GTF2I_HUMAN_831	R.KINSSphosPNVNTTASGVEDLNIIQVTIPDDDNER.L	R.KINSSphosPNVNTT.A	-1.19337	0.650596	3	3	sp|P78347|GTF2I_HUMAN	STYX	Q1	1	0.9909	0.969	0.985	KESTSSKSPPRKINSSPNVNTTASGVEDLNI
sp|Q96AE4|FUBP1_HUMAN_99	R.SphosVMTEEYK.V	R.SphosVMTEEYK.V	-1.19337	0.416639	1	1	sp|Q96AE4|FUBP1_HUMAN	STYX	Q1	0.9993	0.9993	0.911	0.976	SFGTQLPPMHQQQSRSVMTEEYKVPDGMVGF
sp|Q96MU7|YTDC1_HUMAN_308	R.GISphosPIVFDR.S	R.GISphosPIVFDR.S	-1.19337	0.910748	25	28	sp|Q96MU7|YTDC1_HUMAN	STYX	Q1	0.9997	0.9998	1	1	GSDEKKKERKRARGISPIVFDRSGSSASESY
sp|Q9BVC5|ASHWN_HUMAN_143 145 146 147 148_C	R.KLSphosN(SSSS)phosVSPLILSSNLPVNNK.T	R.KLSphosN(SSSS)phosVSPLILSSNLPVNNK.T	-1.19337	0.406443	1	3	sp|Q9BVC5|ASHWN_HUMAN	STYX	Q1	0.9473	0.9961	0.796	0.8	PPPQASFTSNAFRKLSNSSSSVSPLILSSNL PQASFTSNAFRKLSNSSSSVSPLILSSNLPV QASFTSNAFRKLSNSSSSVSPLILSSNLPVN ASFTSNAFRKLSNSSSSVSPLILSSNLPVNN SFTSNAFRKLSNSSSSVSPLILSSNLPVNNK
sp|Q8IX03|KIBRA_HUMAN_931	R.SKTFSphosPGPQSQYVCR.L	R.SKTFSphosPGPQSQYVCR.L	-1.19337	-0.523655	1	3	sp|Q8IX03|KIBRA_HUMAN	STYX	Q4	0.9832	0.9998	0.859	0.956	GPFLRGSTIIRSKTFSPGPQSQYVCRLNRSD
sp|Q96SN8|CK5P2_HUMAN_1238	K.FRDLSphosPPRYDSLVQSQAR.E	R.DLSphosPPRYDSLVQSQAR.E	-1.19337	-0.393258	1	7	sp|Q96SN8|CK5P2_HUMAN	STYX	Q4	0.9998	0.9999	0.98	1	LFSEIHNLQNKFRDLSPPRYDSLVQSQAREL
sp|Q9BVS4|RIOK2_HUMAN_369 370_C	R.(SS)phosGDPEQIKEDSLSEESADAR.S	R.(SS)phosGDPEQIKEDSLSEESADAR.S	-1.19337	-1.06179	1	2	sp|Q9BVS4|RIOK2_HUMAN	STYX	Q4	1	1	0.998	0.998	SERNCLEESEGCYCRSSGDPEQIKEDSLSEE ERNCLEESEGCYCRSSGDPEQIKEDSLSEES
sp|Q9UGU5|HMGX4_HUMAN_203 204 205_C	K.EKG(SSS)phosVDEESFQYPSQQATVK.K	K.G(SSS)phosVDEESFQYPSQQATVK.K	-1.19337	-0.31528	1	2	sp|Q9UGU5|HMGX4_HUMAN	STYX	Q4	0.9908	0.9846	0.787	0.996	DGLKMKLILSPKEKGSSSVDEESFQYPSQQA GLKMKLILSPKEKGSSSVDEESFQYPSQQAT LKMKLILSPKEKGSSSVDEESFQYPSQQATV
sp|A1X283|SPD2B_HUMAN_528	R.KESphosIIKSEGELLER.E	R.KESphosIIKSEGELLER.E	-1.19337	0.149535	5	12	sp|A1X283|SPD2B_HUMAN	STYX	NR	1	1	0.998	0.998	DPDMEEKPSLPPRKESIIKSEGELLERERER
sp|O60749|SNX2_HUMAN_226 227 228 229_C	K.VGKED(SSST)phosEFVEK.R	K.VGKED(SSST)phosEFVEK.R	-1.19337	-0.149399	3	4	sp|O60749|SNX2_HUMAN	STYX	NR	1	1	1	1	KSIVGMTKVKVGKEDSSSTEFVEKRRAALER SIVGMTKVKVGKEDSSSTEFVEKRRAALERY IVGMTKVKVGKEDSSSTEFVEKRRAALERYL VGMTKVKVGKEDSSSTEFVEKRRAALERYLQ
sp|O95232|LC7L3_HUMAN_115 116_C	R.LALSQNQQ(SS)phosGAAGPTGK.N	R.LALSQNQQ(SS)phosGAAGPTGK.N	-1.19337	0.0915199	1	4	sp|O95232|LC7L3_HUMAN	STYX	NR	0.9918	1	0.923	0.998	IRRGHARLALSQNQQSSGAAGPTGKNEEKIQ RRGHARLALSQNQQSSGAAGPTGKNEEKIQV
sp|P31943|HNRH1_HUMAN_63	R.EGRPSGEAFVELESphosEDEVK.L	R.EGRPSGEAFVELESphosEDEVK.L	-1.19337	-0.233284	9	6	sp|P31943|HNRH1_HUMAN	STYX	NR	1	1	0.999	0.999	TREGRPSGEAFVELESEDEVKLALKKDRETM
sp|P45974|UBP5_HUMAN_783	R.SAADSphosISESVPVGPK.V	R.SAADSphosISESVPVGPK.V	-1.19337	0.0870708	4	6	sp|P45974|UBP5_HUMAN	STYX	NR	1	1	0.994	0.994	AEAAMDISEGRSAADSISESVPVGPKVRDGP
sp|P63279|UBC9_HUMAN_71	R.MLFKDDYPSSphosPPK.C	R.MLFKDDYPSSphosPPK.C	-1.19337	0.186887	1	2	sp|P63279|UBC9_HUMAN	STYX	NR	0.9985	1	0.931	0.982	GLFKLRMLFKDDYPSSPPKCKFEPPLFHPNV
sp|Q13636|RAB31_HUMAN_35	R.FVQDHFDHNISphosPTIGASFMTK.T	R.FVQDHFDHNISphosPTIGASFMTK.T	-1.19337	-0.0466076	3	5	sp|Q13636|RAB31_HUMAN	STYX	NR	1	1	0.994	0.997	SIVCRFVQDHFDHNISPTIGASFMTKTVPCG
sp|Q53GA4|PHLA2_HUMAN_3	-.MKSphosPDEVLR.E	-.MKSphosPDEVLR.E	-1.19337	0.244172	3	1	sp|Q53GA4|PHLA2_HUMAN	STYX	NR	0.9987	0.9965	1	1	_____________MKSPDEVLREGELEKRSD
sp|Q7KZF4|SND1_HUMAN_781	R.LGTLSphosPAFSTR.V	R.LGTLSphosPAFSTR.V	-1.19337	-0.163253	5	5	sp|Q7KZF4|SND1_HUMAN	STYX	NR	0.9994	0.9998	0.995	0.995	YGNREVLPSTRLGTLSPAFSTRVLPAQATEY
sp|Q96FS4|SIPA1_HUMAN_908 912	R.TLSphosLRNSphosISR.L	R.TLSphosLRNSphosISR.L	-1.19337	-0.0466076	1	1	sp|Q96FS4|SIPA1_HUMAN	STYX	NR	0.9585	0.961	0.989	0.941	NPAPELRASFLPRTLSLRNSISRIMSEAGSG ELRASFLPRTLSLRNSISRIMSEAGSGTLED
sp|Q9C0D5|TANC1_HUMAN_1855	K.RSphosFIESNV.-	K.RSphosFIESNV.-	-1.19337	-0.0326684	1	1	sp|Q9C0D5|TANC1_HUMAN	STYX	NR	0.912	0.9994	0.993	0.997	NEAHRSHLTAAKPKRSFIESNV_________
sp|Q9UKV3|ACINU_HUMAN_561	R.ASphosHTLLPSHR.L	R.RASphosHTLLPSHR.L	-1.19337	0.28926	9	41	sp|Q9UKV3|ACINU_HUMAN	STYX	NR	1	1	0.996	0.996	CLKQPSLEQKEGRRASHTLLPSHRLKQSADS
tr|Q5T0V7|Q5T0V7_HUMAN_106	R.LEEVKPVVEVHHQSphosEQETSVR.K	R.LEEVKPVVEVHHQSphosEQETSVR.K	-1.19337	-0.209546	2	6	tr|Q5T0V7|Q5T0V7_HUMAN	STYX	NR	1	1	0.994	0.996	ARLEEVKPVVEVHHQSEQETSVRKRRIKKSS
sp|Q14135|VGLL4_HUMAN_52	R.TGPPPISphosPSK.R	R.TGPPPISphosPSK.R	-1.1854	0.191692	2	32	sp|Q14135|VGLL4_HUMAN	STYX	NR	0.9982	1	0.986	0.993	VASALSSHRTGPPPISPSKRKFSMEPGDEDL
sp|Q8WVR3|MA11_HUMAN_541	R.AITphosPPVASPVGRPL.Y	R.AITphosPPVASPVGRPLYLPPDK.A	-1.18243	-0.321027	4	18	sp|Q8WVR3|MA11_HUMAN	STYX	Q4	1	1	0.999	0.999	SHLMRSGSVMERRAITPPVASPVGRPLYLPP
sp|Q9C0A6|SETD5_HUMAN_1232 1233_C	K.GATV(YS)phosPSR.Y	K.GATV(YS)phosPSR.Y	-1.18144	-2.82622	2	1	sp|Q9C0A6|SETD5_HUMAN	STYX	Q4	0.9976	0.9804	0.983	0.985	GPETLSSALSKGATVYSPSRYSYQLLQCDSP PETLSSALSKGATVYSPSRYSYQLLQCDSPR
sp|Q15149|PLEC_HUMAN_3785	R.RLTphosAEDLFEAR.L	R.RLTphosAEDLFEAR.L	-1.18085	0.866805	2	6	sp|Q15149|PLEC_HUMAN	STYX	Q1	0.9993	1	1	1	RQQGLASYDYVRRRLTAEDLFEARIISLETY
sp|Q96L73|NSD1_HUMAN_1509 1510_C	R.TA(TS)phosPKETVEEGVEHDPGMPASK.K	R.TA(TS)phosPKETVEEGVEHDPGMPASK.K	-1.17438	-0.64627	2	2	sp|Q96L73|NSD1_HUMAN	STYX	Q4	1	1	0.979	0.979	EIPGSEGELMPHRTATSPKETVEEGVEHDPG IPGSEGELMPHRTATSPKETVEEGVEHDPGM
sp|Q9Y2K6|UBP20_HUMAN_333	R.KFSphosWGQQR.T	R.KFSphosWGQQR.T	-1.1703	0.684744	4	3	sp|Q9Y2K6|UBP20_HUMAN	STYX	Q1	0.9985	0.9989	1	1	GRAISEKERMKDRKFSWGQQRTNSEQVDEDA
sp|O14497|ARI1A_HUMAN_696 698	R.GPSphosPSphosPVGSPASVAQSR.S	R.GPSphosPSphosPVGSPASVAQSR.S	-1.16952	0.974251	1	1	sp|O14497|ARI1A_HUMAN	STYX	Q1	0.9953	0.9998	0.681	0.678	FSPHTSPHLPGIRGPSPSPVGSPASVAQSRS PHTSPHLPGIRGPSPSPVGSPASVAQSRSGP
sp|P12755|SKI_HUMAN_720	R.ARPEAAGSphosEGAAELEP.-	R.ARPEAAGSphosEGAAELEP.-	-1.16952	0.31294	1	2	sp|P12755|SKI_HUMAN	STYX	Q1	0.9982	0.9998	1	1	LQEQLWPRARPEAAGSEGAAELEP_______
sp|Q9BVC5|ASHWN_HUMAN_143	R.KLSphosNSSSSVSPLIL.S	R.KLSphosNSSSSVSPLILSSNLPVNNK.T	-1.16952	0.476345	7	7	sp|Q9BVC5|ASHWN_HUMAN	STYX	Q1	0.9992	0.9997	0.995	0.998	PPPQASFTSNAFRKLSNSSSSVSPLILSSNL
sp|Q9NP64|NO40_HUMAN_114	R.SphosFQDYTGQK.L	R.SphosFQDYTGQK.L	-1.16952	0.406443	4	6	sp|Q9NP64|NO40_HUMAN	STYX	Q1	0.9991	0.9998	0.994	0.994	DPNNVIIEQEERRRRSFQDYTGQKITLEAVL
sp|Q9UPU5|UBP24_HUMAN_1299	R.QLSphosVSDR.S	R.QLSphosVSDR.S	-1.16952	0.475159	1	2	sp|Q9UPU5|UBP24_HUMAN	STYX	Q1	0.9984	0.9843	0.987	0.988	MSLCGTPEKSSYRQLSVSDRSSIRVEEIIPA
tr|A0A384DVL6|A0A384DVL6_HUMAN_580	K.SphosRSPAPPADKEAEKPVFFPAFAAEAQK.L	K.SphosRSPAPPADKEAEKPVFFPAFAAEAQK.L	-1.16952	0.476345	1	1	tr|A0A384DVL6|A0A384DVL6_HUMAN	STYX	Q1	0.9958	1	0.5	0.5	ESDAPQQPGSSPRGKSRSPAPPADKEAEKPV
sp|P51532|SMCA4_HUMAN_1421 1422 1423_C	R.DSDAG(SST)phosPTTSTR.S	R.DSDAG(SST)phosPTTSTR.S	-1.16952	-0.543825	5	2	sp|P51532|SMCA4_HUMAN	STYX	Q4	0.9975	0.9991	0.998	0.998	QKKSSRKRKRDSDAGSSTPTTSTRSRDKDDE KKSSRKRKRDSDAGSSTPTTSTRSRDKDDES KSSRKRKRDSDAGSSTPTTSTRSRDKDDESK
sp|P78324|SHPS1_HUMAN_429	R.EITQDTNDITYphosADLNLPK.G	R.EITQDTNDITYphosADLNLPK.G	-1.16952	-1.08925	3	1	sp|P78324|SHPS1_HUMAN	STYX	Q4	1	1	0.991	0.983	EKNAREITQDTNDITYADLNLPKGKKPAPQA
sp|Q12906|ILF3_HUMAN_188	K.VLAGETphosLSVNDPPDVLDR.Q	K.VLAGETphosLSVNDPPDVLDR.Q	-1.16952	-1.00519	1	1	sp|Q12906|ILF3_HUMAN	STYX	Q4	0.9987	0.997	0.5	0.516	SPVVREEMEKVLAGETLSVNDPPDVLDRQKC
sp|Q53ET0|CRTC2_HUMAN_70	R.SSHYGGSphosLPNVNQIGSGLAEFQSPLHSPLDSSR.S	R.SSHYGGSphosLPNVNQIGSGLAEFQSPLHSPLDSSR.S	-1.16952	-0.596939	6	4	sp|Q53ET0|CRTC2_HUMAN	STYX	Q4	0.9856	0.9933	0.997	0.997	QKLRLAYTRSSHYGGSLPNVNQIGSGLAEFQ
sp|Q96CW1|AP2M1_HUMAN_152 153_C	K.EEQSQI(TS)phosQVTGQIGWR.R	K.EEQSQI(TS)phosQVTGQIGWR.R	-1.16952	-1.00519	1	1	sp|Q96CW1|AP2M1_HUMAN	STYQ	Q4	0.997	0.9991	0.54	0.666	GIKSQHQTKEEQSQITSQVTGQIGWRREGIK IKSQHQTKEEQSQITSQVTGQIGWRREGIKY
sp|O14497|ARI1A_HUMAN_233	R.SAYPPPAPAYALSSphosPR.G	R.SAYPPPAPAYALSSphosPR.G	-1.16952	-0.118473	1	6	sp|O14497|ARI1A_HUMAN	STYX	NR	0.9997	1	0.945	0.99	NRSAYPPPAPAYALSSPRGGTPGSGAAAAAG
sp|O75533|SF3B1_HUMAN_432	R.KLTphosATPTPLGGMTGF.H	R.KLTphosATPTPLGGMTGFHMQTEDR.T	-1.16952	0.209406	5	3	sp|O75533|SF3B1_HUMAN	STYX	NR	1	1	0.994	0.994	PPAGYVPIRTPARKLTATPTPLGGMTGFHMQ
sp|P29590|PML_HUMAN_480	R.KCSphosQTQCPR.K	R.KCSphosQTQCPR.K	-1.16952	0.0482515	7	3	sp|P29590|PML_HUMAN	STYQ	NR	0.9986	0.9996	0.993	0.993	GEDVSNTTTAQKRKCSQTQCPRKVIKMESEE
sp|Q5BKX6|S45A4_HUMAN_348	R.STSphosQELAK.T	R.STSphosQELAK.T	-1.16952	0.151656	3	2	sp|Q5BKX6|S45A4_HUMAN	STYQ	NR	0.9988	0.9988	0.993	0.993	SIFHDASYPATPRSTSQELAKTKLPRLATFL
sp|Q68DK7|MSL1_HUMAN_333	K.RKSphosPFGSTER.K	K.RKSphosPFGSTER.K	-1.16952	0.0742468	2	2	sp|Q68DK7|MSL1_HUMAN	STYX	NR	0.9992	0.9999	0.998	0.996	KPFSCGRSGKGHKRKSPFGSTERKTPVKKLA
sp|Q6P9B9|INT5_HUMAN_1010	R.FQAPSphosPSTLLR.Q	R.FQAPSphosPSTLLR.Q	-1.16952	-0.193949	3	7	sp|Q6P9B9|INT5_HUMAN	STYX	NR	0.9993	0.9998	0.993	0.994	NIDRLGLFSGRFQAPSPSTLLRQGT______
sp|Q86UZ6|ZBT46_HUMAN_168	R.SISphosPWLAR.R	R.SISphosPWLAR.R	-1.16952	0.124015	5	2	sp|Q86UZ6|ZBT46_HUMAN	STYX	NR	0.9986	0.9971	0.996	0.988	STEALISAVMAGRSISPWLARRTSPANSSGD
sp|Q8WWY3|PRP31_HUMAN_450 451 455_C	R.SSGTA(SS)phosVAFTphosPLQGLEIVNPQAAEKK.V	R.SSGTA(SS)phosVAFTphosPLQGLEIVNPQAAEK.K	-1.16952	-0.186234	7	10	sp|Q8WWY3|PRP31_HUMAN	STYX	NR	0.9976	0.9978	1.306	1.284	YGGKSTIRDRSSGTASSVAFTPLQGLEIVNP GGKSTIRDRSSGTASSVAFTPLQGLEIVNPQ TIRDRSSGTASSVAFTPLQGLEIVNPQAAEK
sp|Q92887|MRP2_HUMAN_283	K.NQSQSphosQDALVLEDVEKK.K	K.NQSQSphosQDALVLEDVEK.K	-1.16952	0.16171	1	1	sp|Q92887|MRP2_HUMAN	STYQ	NR	1	0.9998	0.722	0.918	NSGARLPGLNKNQSQSQDALVLEDVEKKKKK
sp|Q9BUA3|SPNDC_HUMAN_82	K.QQVSWEQEFLVGSSphosPGGSGR.A	K.QQVSWEQEFLVGSSphosPGGSGR.A	-1.16952	-0.273677	6	1	sp|Q9BUA3|SPNDC_HUMAN	STYX	NR	1	1	0.968	0.915	PKQQVSWEQEFLVGSSPGGSGRALCMVCGAE
sp|Q9BY89|K1671_HUMAN_533	K.SAELSphosGEFPKEPR.E	K.SAELSphosGEFPKEPR.E	-1.16952	0.221088	5	3	sp|Q9BY89|K1671_HUMAN	STYX	NR	0.9998	0.9999	0.998	0.997	SASSNEVKYEKSAELSGEFPKEPREKQKEGH
sp|Q9H792|PEAK1_HUMAN_875 876 877 878_C	R.(STSS)phosPYHAGNLLQR.H	R.(STSS)phosPYHAGNLLQR.H	-1.16952	-0.118398	1	3	sp|Q9H792|PEAK1_HUMAN	STYX	NR	0.9363	0.9953	0.998	0.998	TSPQSEPPAPFPPPRSTSSPYHAGNLLQRHF SPQSEPPAPFPPPRSTSSPYHAGNLLQRHFT PQSEPPAPFPPPRSTSSPYHAGNLLQRHFTN QSEPPAPFPPPRSTSSPYHAGNLLQRHFTNW
sp|Q9UQB8|BAIP2_HUMAN_340	K.LSDSYSNTphosLPVRK.S	K.LSDSYSNTphosLPVR.K	-1.16952	-0.0326684	5	11	sp|Q9UQB8|BAIP2_HUMAN	STYX	NR	1	1	0.991	0.996	SPPQSQSKLSDSYSNTLPVRKSVTPKNSYAT
sp|Q9NYF8|BCLF1_HUMAN_341	K.RFTphosDEESR.V	K.RFTphosDEESR.V	-1.15817	1.48121	2	7	sp|Q9NYF8|BCLF1_HUMAN	STYX	Q1	0.9931	0.9998	0.996	0.997	GDQETAKTGKFLKRFTDEESRVFLLDRGNTR
sp|Q96N67|DOCK7_HUMAN_439	R.RNSphosSIVGR.R	R.RNSphosSIVGR.R	-1.15779	-0.273677	2	5	sp|Q96N67|DOCK7_HUMAN	STYX	NR	0.9808	0.9995	0.936	0.939	ISTGERKGSWSERRNSSIVGRRSLERTTSGD
sp|Q9Y2K2|SIK3_HUMAN_469	R.RHTphosVGVADPR.T	R.RHTphosVGVADPR.T	-1.15741	0.266892	4	7	sp|Q9Y2K2|SIK3_HUMAN	STYX	NR	0.9999	1	1	1	PSPEALVRYLSMRRHTVGVADPRTEVMEDLQ
sp|O14497|ARI1A_HUMAN_381 382_C	R.TPQP(SS)phosPMDQMGK.M	R.TPQP(SS)phosPMDQMGK.M	-1.15437	-0.0326684	2	6	sp|O14497|ARI1A_HUMAN	STYX	NR	0.9991	1	0.998	0.998	SSGGGGQPLARTPQPSSPMDQMGKMRPQPYG SGGGGQPLARTPQPSSPMDQMGKMRPQPYGG
sp|P22626|ROA2_HUMAN_189	K.ALSphosRQEMQEVQSSR.S	K.ALSphosRQEMQEVQSSR.S	-1.15228	-0.193949	6	6	sp|P22626|ROA2_HUMAN	STYX	NR	0.9999	1	0.997	0.998	YHTINGHNAEVRKALSRQEMQEVQSSRSGRG
sp|O95197|RTN3_HUMAN_229	Y.SLSphosPSKVSGDDVIEKDSPESPFEVIIDK.A	Y.SLSphosPSKVSGDDVIEK.D	-1.15134	1.04627	4	2	sp|O95197|RTN3_HUMAN	STYX	Q1	1	1	0.996	0.996	PTEYSKVEGIYTYSLSPSKVSGDDVIEKDSP
sp|Q9NS23|RASF1_HUMAN_206 207_C	R.(TS)phosFYLPK.D	R.R(TS)phosFYLPK.D	-1.14907	-0.375556	2	3	sp|Q9NS23|RASF1_HUMAN	STYX	Q4	0.997	0.9993	0.988	0.902	DARRGPGRGTSVRRRTSFYLPKDAVKHLHVL ARRGPGRGTSVRRRTSFYLPKDAVKHLHVLS
sp|Q9HB58|SP110_HUMAN_380	R.VTQGAASphosPGHGIQEK.L	R.VTQGAASphosPGHGIQEK.L	-1.14625	0.343707	12	11	sp|Q9HB58|SP110_HUMAN	STYX	Q1	1	1	0.998	0.998	QKTPSTPRRVTQGAASPGHGIQEKLQVVDKV
sp|Q9UKX7|NUP50_HUMAN_221	K.VAAETQSphosPSLFGSTK.L	K.VAAETQSphosPSLFGSTK.L	-1.14625	0.31673	24	18	sp|Q9UKX7|NUP50_HUMAN	STYX	Q1	0.9999	0.9999	0.995	0.994	RNSESESNKVAAETQSPSLFGSTKLQQESTF
sp|O14497|ARI1A_HUMAN_1184	R.SNSphosVGIQDAFNDGSDSTFQK.R	R.SNSphosVGIQDAFNDGSDSTFQKR.N	-1.14606	0.552294	38	43	sp|O14497|ARI1A_HUMAN	STYX	Q1	1	1	0.996	0.996	PHSQIPPLPGMSRSNSVGIQDAFNDGSDSTF
sp|P41182|BCL6_HUMAN_333	K.GLVSPQSphosPQK.S	K.GLVSPQSphosPQK.S	-1.14606	0.416639	3	3	sp|P41182|BCL6_HUMAN	STYX	Q1	0.9954	0.9998	0.988	0.995	PPNAPLNRKGLVSPQSPQKSDCQPNSPTESC
sp|Q2KHR2|RFX7_HUMAN_1025	R.LTphosPVSPVQHQGATVNNTNKQEGFAVPAPLDNK.G	R.LTphosPVSPVQHQGATVNNTNKQEGFAVPAPLDNK.G	-1.14606	0.364924	1	1	sp|Q2KHR2|RFX7_HUMAN	STYX	Q1	0.9993	0.9976	0.358	0.499	YQSQSRHHDTHFGRLTPVSPVQHQGATVNNT
sp|Q9NWH9|SLTM_HUMAN_144	K.ELLSphosAEENKR.A	K.ELLSphosAEENKR.A	-1.14606	0.332981	1	2	sp|Q9NWH9|SLTM_HUMAN	STYX	Q1	0.9936	0.9985	1	1	FGENEEENVHSKELLSAEENKRAHELIEAEG
sp|O95251|KAT7_HUMAN_205	R.HFSphosISGCPLYHNLSADECK.V	R.HFSphosISGCPLYHNLSADECK.V	-1.14606	-1.58465	1	2	sp|O95251|KAT7_HUMAN	STYX	Q4	0.903	1	0.916	0.992	CNSLGHLTGKHERHFSISGCPLYHNLSADEC
sp|Q12830|BPTF_HUMAN_2370	R.QSKLSphosPQMQVHQDK.T	K.LSphosPQMQVHQDK.T	-1.14606	-0.290165	1	3	sp|Q12830|BPTF_HUMAN	STYX	Q4	0.9993	1	0.968	1	STTAAGTGEQRQSKLSPQMQVHQDKTLPPAQ
sp|Q9UQR1|ZN148_HUMAN_665	R.SGMNSphosPLR.T	R.SGMNSphosPLR.T	-1.14606	-0.429327	5	1	sp|Q9UQR1|ZN148_HUMAN	STYX	Q4	0.9993	0.9155	0.997	0.996	VYATMPINSFRSGMNSPLRTTPDKSHFGLIV
sp|A0A0B4J241|TVAM1_HUMAN_37	E.GDSphosAVIK.C	E.GDSphosAVIK.C	-1.14606	0.173782	1	1	sp|A0A0B4J241|TVAM1_HUMAN	STYX	NR	0.9175	0.9375	1	1	NVEQHPSTLSVQEGDSAVIKCTYSDSASNYF
sp|Q5R3F8|PPR29_HUMAN_619	R.QLSphosADAAVTR.K	R.QLSphosADAAVTR.K	-1.14606	0.000821956	3	6	sp|Q5R3F8|PPR29_HUMAN	STYX	NR	0.9997	1	0.997	0.998	PPYKESSHHPLQRQLSADAAVTRKTCSVSSS
sp|Q96PK6|RBM14_HUMAN_618	R.RLSphosESQLSFR.R	R.RLSphosESQLSFR.R	-1.14606	-0.273677	13	8	sp|Q96PK6|RBM14_HUMAN	STYX	NR	0.9999	1	0.987	0.99	GSDRRLAELSDYRRLSESQLSFRRSPTKSSL
sp|Q9BVA0|KTNB1_HUMAN_393	K.NSISphosRTPPRR.S	K.NSISphosRTPPRR.S	-1.14606	-0.161736	1	2	sp|Q9BVA0|KTNB1_HUMAN	STYX	NR	0.9836	0.9721	0.497	0.496	NAEDYNEIFQPKNSISRTPPRRSEPFPAPPE
sp|Q9Y6Y8|S23IP_HUMAN_926	K.VVESphosPDFSKDEDYLGK.V	K.VVESphosPDFSKDEDYLGK.V	-1.14606	-0.089252	3	16	sp|Q9Y6Y8|S23IP_HUMAN	STYX	NR	1	1	0.998	0.998	EEEEKQVVEAEKVVESPDFSKDEDYLGKVGM
sp|Q03518|TAP1_HUMAN_545	K.IFEYLDRTphosPR.C	K.IFEYLDRTphosPR.C	-1.14494	-0.523787	4	2	sp|Q03518|TAP1_HUMAN	STYX	Q4	0.9958	0.9968	0.99	0.997	KAVGSSEKIFEYLDRTPRCPPSGLLTPLHLE
tr|Q5T760|Q5T760_HUMAN_338	R.SRSphosASSLHICDSR.E	R.SphosASSLHICDSR.E	-1.14494	0.137257	2	4	tr|Q5T760|Q5T760_HUMAN	STYX	NR	1	0.9999	0.941	0.993	SKTPPKSYSTARRSRSASSLHICDSRERRRR
sp|Q8WYL5|SSH1_HUMAN_583	R.SGSphosLLQVEETER.E	R.SGSphosLLQVEETEREEGLGAGR.W	-1.13563	0.266892	8	5	sp|Q8WYL5|SSH1_HUMAN	STYX	NR	1	1	0.967	0.96	VKKKLEFGSPKGRSGSLLQVEETEREEGLGA
sp|Q12888|TP53B_HUMAN_639 640_C	R.SEAL(SS)phosVLDQEEAMEIK.E	R.SEAL(SS)phosVLDQEEAMEIK.E	-1.13452	1.68071	8	2	sp|Q12888|TP53B_HUMAN	STYX	Q1	1	1	1	1	GSQAVPSPATRSEALSSVLDQEEAMEIKEHH SQAVPSPATRSEALSSVLDQEEAMEIKEHHP
sp|Q15648|MED1_HUMAN_1439 1440_C	K.NYGSPLISG(ST)phosPK.H	K.NYGSPLISG(ST)phosPK.H	-1.13452	-0.0956279	4	2	sp|Q15648|MED1_HUMAN	STYX	NR	1	0.9995	0.964	0.974	QMASSKNYGSPLISGSTPKHERGSPSHSKSP MASSKNYGSPLISGSTPKHERGSPSHSKSPA
sp|Q9H4L7|SMRCD_HUMAN_79	K.ASphosISYFK.N	R.KASphosISYFK.N	-1.12754	0.300315	4	12	sp|Q9H4L7|SMRCD_HUMAN	STYX	Q1	0.9986	0.9996	0.994	0.985	EDSSVPETPDNERKASISYFKNQRGIQYIDL
sp|Q7Z589|EMSY_HUMAN_1212 1213_C	R.ESC(SS)phosPSTVGSSLTTR.K	R.ESC(SS)phosPSTVGSSLTTR.K	-1.12754	0.124873	2	8	sp|Q7Z589|EMSY_HUMAN	STYX	NR	0.9968	0.9961	0.998	0.998	MANSTPQQQKCRESCSSPSTVGSSLTTRKID ANSTPQQQKCRESCSSPSTVGSSLTTRKIDP
sp|Q6ZNB6|NFXL1_HUMAN_835	R.KASphosEIKEAEAK.A	R.KASphosEIKEAEAK.A	-1.12462	-0.543284	2	1	sp|Q6ZNB6|NFXL1_HUMAN	STYX	Q4	0.9923	0.9815	1	1	SIECDTTCKEMKRKASEIKEAEAKAALEEEK
sp|Q9P2D1|CHD7_HUMAN_2532 2533_C	K.R(TS)phosLSAEDAEVTK.A	K.R(TS)phosLSAEDAEVTK.A	-1.12371	0.0997263	4	6	sp|Q9P2D1|CHD7_HUMAN	STYX	NR	0.9998	1	0.507	0.911	KNVEGLDLLFMSHKRTSLSAEDAEVTKAFEE NVEGLDLLFMSHKRTSLSAEDAEVTKAFEED
sp|Q9UKX7|NUP50_HUMAN_219	K.VAAETphosQSPSLFGSTK.L	K.VAAETphosQSPSLFGSTK.L	-1.12371	0.00835882	2	3	sp|Q9UKX7|NUP50_HUMAN	STYQ	NR	0.9998	0.9999	0.499	0.499	SGRNSESESNKVAAETQSPSLFGSTKLQQES
sp|O94916|NFAT5_HUMAN_560 561_C	K.EI(SS)phosPARPCSFEEAMK.A	K.EI(SS)phosPARPCSFEEAMK.A	-1.12298	0.50517	13	26	sp|O94916|NFAT5_HUMAN	STYX	Q1	1	1	1	1	PAAAGALNVNVKKEISSPARPCSFEEAMKAM AAAGALNVNVKKEISSPARPCSFEEAMKAMK
sp|P16144|ITB4_HUMAN_1517 1518_C	R.DYSTLTSV(SS)phosHDSR.L	R.DYSTLTSV(SS)phosHDSR.L	-1.12298	0.375416	1	5	sp|P16144|ITB4_HUMAN	STYX	Q1	0.9998	1	0.527	0.998	HSTTLPRDYSTLTSVSSHDSRLTAGVPDTPT STTLPRDYSTLTSVSSHDSRLTAGVPDTPTR
sp|P19338|NUCL_HUMAN_580	K.GLSphosEDTTEETLK.E	K.GLSphosEDTTEETLK.E	-1.12298	0.955667	9	8	sp|P19338|NUCL_HUMAN	STYX	Q1	1	1	0.998	0.998	NARSQPSKTLFVKGLSEDTTEETLKESFDGS
sp|P22102|PUR2_HUMAN_796	K.NGSphosLTNHFSFEK.K	K.NGSphosLTNHFSFEK.K	-1.12298	0.874203	11	10	sp|P22102|PUR2_HUMAN	STYX	Q1	1	1	0.997	0.997	LIESMQINGSVLKNGSLTNHFSFEKKKARVA
sp|Q13263|TIF1B_HUMAN_471	R.SphosRSGEGEVSGL.M	R.SphosRSGEGEVSGLMR.K	-1.12298	0.873007	9	2	sp|Q13263|TIF1B_HUMAN	STYX	Q1	1	1	0.592	0.5	DPYSSAEPHVSGVKRSRSGEGEVSGLMRKVP
sp|Q9BQ89|F110A_HUMAN_78	K.QPLFSphosPETR.R	K.QPLFSphosPETR.R	-1.12298	0.313023	1	2	sp|Q9BQ89|F110A_HUMAN	STYX	Q1	0.9836	0.9977	0.991	0.995	RQEPVQPLLSKQPLFSPETRRTVLTPSRRAL
sp|Q9BVW5|TIPIN_HUMAN_222	K.LLSNSphosQTLGNDMLMNTPR.A	K.LLSNSphosQTLGNDMLMNTPR.A	-1.12298	3.4533	7	6	sp|Q9BVW5|TIPIN_HUMAN	STYQ	Q1	1	1	0.992	0.992	KQLALERRQAKLLSNSQTLGNDMLMNTPRAH
sp|Q9NQ55|SSF1_HUMAN_238	R.LQDISELLATGAGLSphosESEAEPDGDHNITELPQAVAGR.G	A.GLSphosESEAEPDGDHNITELPQAVAGR.G	-1.12298	1.65921	33	5	sp|Q9NQ55|SSF1_HUMAN	STYX	Q1	1	1	0.996	0.997	RLQDISELLATGAGLSESEAEPDGDHNITEL
sp|Q8N5I9|CL045_HUMAN_178	K.IEVLDSphosPASK.K	K.IEVLDSphosPASK.K	-1.12298	-0.475998	1	14	sp|Q8N5I9|CL045_HUMAN	STYX	Q4	0.9746	0.9999	0.948	0.996	LPNSEGGKGKIEVLDSPASKKKK________
sp|Q96IZ7|RSRC1_HUMAN_5 6_C	R.(SS)phosDTEEESR.S	R.(SS)phosDTEEESR.S	-1.12298	-0.318742	1	4	sp|Q96IZ7|RSRC1_HUMAN	STYX	Q4	0.9989	0.9995	0.992	0.998	___________MGRRSSDTEEESRSKRKKKH __________MGRRSSDTEEESRSKRKKKHR
sp|Q9NUQ3|TXLNG_HUMAN_97	R.NLVSphosPAYCTQESR.E	R.NLVSphosPAYCTQESR.E	-1.12298	-0.505445	5	8	sp|Q9NUQ3|TXLNG_HUMAN	STYX	Q4	0.9998	1	0.997	0.998	EDEGSDFITENRNLVSPAYCTQESREEIPGG
sp|P15622|ZN250_HUMAN_168	K.QSFCLSphosPNSVDHR.E	K.QSFCLSphosPNSVDHR.E	-1.12298	0.209406	11	11	sp|P15622|ZN250_HUMAN	STYX	NR	0.9999	0.9999	0.996	0.996	RIDQENNETKQSFCLSPNSVDHREVQVLSQS
sp|P42166|LAP2A_HUMAN_436	R.LSEKSphosVEER.D	R.LSEKSphosVEER.D	-1.12298	0.221088	1	5	sp|P42166|LAP2A_HUMAN	STYX	NR	0.9675	0.9999	0.992	0.995	EFLSPPRKVPRLSEKSVEERDSGSFVAFQNI
sp|Q03252|LMNB2_HUMAN_541	W.AAGAGVAHSphosPPSTLVWK.G	W.AAGAGVAHSphosPPSTLVWK.G	-1.12298	-0.273677	3	3	sp|Q03252|LMNB2_HUMAN	STYX	NR	1	0.9992	0.997	0.993	GQMVTVWAAGAGVAHSPPSTLVWKGQSSWGT
sp|Q13813|SPTN1_HUMAN_1031	K.KLDPAQSASphosRENLLEEQGSIALR.Q	K.KLDPAQSASphosRENLLEEQGSIALR.Q	-1.12298	0.105752	1	2	sp|Q13813|SPTN1_HUMAN	STYX	NR	0.9998	0.9999	0.935	0.966	VPAAYVKKLDPAQSASRENLLEEQGSIALRQ
sp|Q5VWG9|TAF3_HUMAN_199 200_C	R.LL(ST)phosKGDTLDVVLLEAR.E	R.LL(ST)phosKGDTLDVVLLEAR.E	-1.12298	0.0481919	4	4	sp|Q5VWG9|TAF3_HUMAN	STYX	NR	0.9999	0.9999	0.914	0.989	PEAEELPAMKRPRLLSTKGDTLDVVLLEARE EAEELPAMKRPRLLSTKGDTLDVVLLEAREP
sp|Q7Z2Z1|TICRR_HUMAN_1045	R.VHSphosFQQDK.S	R.VHSphosFQQDK.S	-1.12298	0.124873	1	1	sp|Q7Z2Z1|TICRR_HUMAN	STYX	NR	0.9214	0.9987	1	1	YSVSQPKSRSVQRVHSFQQDKSDQRENSPVQ
sp|Q8WU20|FRS2_HUMAN_210 211_C	R.(TS)phosVHVPLEAR.V	R.(TS)phosVHVPLEAR.V	-1.12298	-0.178519	5	5	sp|Q8WU20|FRS2_HUMAN	STYX	NR	0.9996	0.9999	1	1	TYVNTTGVQEERKNRTSVHVPLEARVSNAES YVNTTGVQEERKNRTSVHVPLEARVSNAESS
sp|Q92667|AKAP1_HUMAN_107	R.SESphosSGILPNTTDMR.L	R.SESphosSGILPNTTDMR.L	-1.12298	-0.241255	5	7	sp|Q92667|AKAP1_HUMAN	STYX	NR	1	1	0.992	0.99	PPALLQTHPPCRRSESSGILPNTTDMRLRPG
sp|Q9BQS8|FYCO1_HUMAN_196	R.TLTTGSSAYLWKPPSphosR.S	R.TLTTGSSAYLWKPPSphosR.S	-1.12298	0.106082	3	6	sp|Q9BQS8|FYCO1_HUMAN	STYX	NR	1	1	0.612	0.995	RTLTTGSSAYLWKPPSRSSSMSSLVSSYLQT
sp|Q9BZ29|DOCK9_HUMAN_1275	K.SNSphosLDKHQQSSTLGNSVVR.C	K.SNSphosLDKHQQSSTLGNSVVR.C	-1.12298	-0.00930824	1	4	sp|Q9BZ29|DOCK9_HUMAN	STYX	NR	0.9949	0.9955	0.885	0.995	DSGNSLPERNSEKSNSLDKHQQSSTLGNSVV
sp|Q9P267|MBD5_HUMAN_205	R.LGSphosSEHGQK.S	R.LGSphosSEHGQK.S	-1.12298	0.255577	3	1	sp|Q9P267|MBD5_HUMAN	STYX	NR	0.9987	0.9976	0.989	0.987	QQQELHPVYPRQRLGSSEHGQKSPFRGSHGG
tr|I3L2J0|I3L2J0_HUMAN_809	R.RVPAVQRDSphosPVIVR.N	R.DSphosPVIVR.N	-1.12298	0.148706	2	8	tr|I3L2J0|I3L2J0_HUMAN	STYX	NR	0.9998	0.9999	1	1	DPGPSVRRVPAVQRDSPVIVRNPDVPLPSKF
sp|Q5VTL8|PR38B_HUMAN_290	R.EGHGSSSphosFDRELER.E	R.EGHGSSSphosFDRELER.E	-1.11467	-0.0606828	2	1	sp|Q5VTL8|PR38B_HUMAN	STYX	NR	1	0.9853	0.973	0.98	RSRSRSHHREGHGSSSFDRELEREKERQRLE
sp|Q8TBC3|SHKB1_HUMAN_662	R.GGGSphosFVER.C	R.GGGSphosFVER.C	-1.11377	-1.45966	2	2	sp|Q8TBC3|SHKB1_HUMAN	STYX	Q4	0.9929	0.9989	1	1	SPSPPQAEARRRGGGSFVERCQELVRSGPDL
sp|Q96JM3|CHAP1_HUMAN_376	K.SSSVSphosPSSWK.S	K.SSSVSphosPSSWK.S	-1.11377	-0.089252	2	3	sp|Q96JM3|CHAP1_HUMAN	STYX	NR	0.9971	0.9967	0.987	0.994	PTPSVSSASWKSSSVSPSSWKSPPASPESWK
sp|Q8NFC6|BD1L1_HUMAN_635	R.RLSphosESLHVVDENKNESK.L	R.RLSphosESLHVVDENK.N	-1.11269	0.244172	8	3	sp|Q8NFC6|BD1L1_HUMAN	STYX	NR	1	1	0.5	0.934	HVHAKSEPSKPARRLSESLHVVDENKNESKL
sp|P05787|K2C8_HUMAN_441	Y.SLGSphosSFGSGAGSSSFSR.T	Y.SLGSphosSFGSGAGSSSFSR.T	-1.11162	-1.1184	4	1	sp|P05787|K2C8_HUMAN	STYX	Q4	1	1	0.988	0.949	AYGGLTSPGLSYSLGSSFGSGAGSSSFSRTS
sp|Q9Y3S1|WNK2_HUMAN_1889	R.AGSphosLGPETPSR.V	R.AGSphosLGPETPSR.V	-1.10467	-1.14815	2	1	sp|Q9Y3S1|WNK2_HUMAN	STYX	Q4	0.9977	0.9996	0.998	0.998	VKKATAFLQRPSRAGSLGPETPSRVGMKVPT
sp|Q8IWZ3|ANKH1_HUMAN_1669 1670_C	K.TVSLPL(SS)phosPNIK.L	K.TVSLPL(SS)phosPNIK.L	-1.10043	-0.778912	2	3	sp|Q8IWZ3|ANKH1_HUMAN	STYX	Q4	0.9979	0.9999	0.998	0.998	PNSLSTSYKTVSLPLSSPNIKLNLTSPKRGQ NSLSTSYKTVSLPLSSPNIKLNLTSPKRGQK
sp|P43243|MATR3_HUMAN_596 597 598_C	R.(SYS)phosPDGK.E	R.(SYS)phosPDGK.E	-1.10026	0.68895	6	2	sp|P43243|MATR3_HUMAN	STYX	Q1	1	0.982	1.001	1.001	NRGIDLLKKDKSRKRSYSPDGKESPSDKKSK RGIDLLKKDKSRKRSYSPDGKESPSDKKSKT GIDLLKKDKSRKRSYSPDGKESPSDKKSKTD
sp|P49796|RGS3_HUMAN_917	K.RSSphosMIETGQGAEGGLSLR.V	K.RSSphosMIETGQGAEGGLSLR.V	-1.10026	0.821481	1	3	sp|P49796|RGS3_HUMAN	STYX	Q1	1	1	0.956	0.986	TSDDNYGERSEAKRSSMIETGQGAEGGLSLR
sp|Q12888|TP53B_HUMAN_464	D.IFIPSphosPSLEEQSNDGKK.D	D.IFIPSphosPSLEEQSNDGKK.D	-1.10026	4.06526	4	2	sp|Q12888|TP53B_HUMAN	STYX	Q1	0.9979	0.9929	0.995	0.99	PIPSQPQFSHDIFIPSPSLEEQSNDGKKDGD
sp|Q4G0J3|LARP7_HUMAN_337 338_C	R.DIEI(ST)phosEEEKDTGDLK.D	R.DIEI(ST)phosEEEKDTGDLK.D	-1.10026	0.311286	8	13	sp|Q4G0J3|LARP7_HUMAN	STYX	Q1	1	1	1	1	KEASEASKENRDIEISTEEEKDTGDLKDSSL EASEASKENRDIEISTEEEKDTGDLKDSSLL
sp|Q4G0J3|LARP7_HUMAN_338	R.DIEISTphosEEEKDTGDLK.D	R.DIEISTphosEEEKDTGDLK.D	-1.10026	0.417783	3	4	sp|Q4G0J3|LARP7_HUMAN	STYX	Q1	1	1	0.987	0.98	EASEASKENRDIEISTEEEKDTGDLKDSSLL
sp|Q9UQ35|SRRM2_HUMAN_2302	R.TPTAPAVNLAGARTphosPAALAAL.S	R.TPTAPAVNLAGARTphosPAALAALSLTGSGTPPTAANYPSSSR.T	-1.10026	0.693157	11	1	sp|Q9UQ35|SRRM2_HUMAN	STYX	Q1	1	0.9716	0.999	0.998	PRTPTAPAVNLAGARTPAALAALSLTGSGTP
sp|Q07157|ZO1_HUMAN_212	K.EISphosQDSLAAR.D	K.EISphosQDSLAAR.D	-1.10026	-1.03267	3	2	sp|Q07157|ZO1_HUMAN	STYQ	Q4	0.9992	0.999	0.995	0.995	EYGLRLASHIFVKEISQDSLAARDGNIQEGD
sp|Q8N1F7|NUP93_HUMAN_49 51 52_C	R.TLTphosR(TS)phosQETADVK.A	R.TLTphosR(TS)phosQETADVK.A	-1.10026	-1.00519	1	1	sp|Q8N1F7|NUP93_HUMAN	STYQ	Q4	0.9915	0.9992	0.666	0.666	QEIQQAGERLRSRTLTRTSQETADVKASVLL IQQAGERLRSRTLTRTSQETADVKASVLLGS QQAGERLRSRTLTRTSQETADVKASVLLGSR
sp|O14497|ARI1A_HUMAN_232 233_C	R.SAYPPPAPAYAL(SS)phosPR.G	R.SAYPPPAPAYAL(SS)phosPR.G	-1.10026	0.0613077	1	3	sp|O14497|ARI1A_HUMAN	STYX	NR	0.9995	0.9999	0.994	0.998	PNRSAYPPPAPAYALSSPRGGTPGSGAAAAA NRSAYPPPAPAYALSSPRGGTPGSGAAAAAG
sp|P50851|LRBA_HUMAN_1488	K.SAAKSphosPVDIVTGGISPVR.D	K.SAAKSphosPVDIVTGGISPVR.D	-1.10026	-0.109144	3	4	sp|P50851|LRBA_HUMAN	STYX	NR	1	1	0.996	0.997	KPMHSLIPLGKSAAKSPVDIVTGGISPVRDL
sp|Q14160|SCRIB_HUMAN_1378	K.RVSphosLVGADDLR.K	K.RVSphosLVGADDLR.K	-1.10026	0.0676612	11	32	sp|Q14160|SCRIB_HUMAN	STYX	NR	1	1	1	1	LEVRVPQAEGPPKRVSLVGADDLRKMQEEEA
sp|Q53F19|NCBP3_HUMAN_530	R.QDSphosKGLYADTR.E	R.QDSphosKGLYADTR.E	-1.10026	-0.241255	1	3	sp|Q53F19|NCBP3_HUMAN	STYX	NR	0.9819	0.9987	0.996	0.997	PSSDVHSRLGVPRQDSKGLYADTREKKSGNL
sp|Q5JSZ5|PRC2B_HUMAN_226	R.HIISATSLSTSphosPTELGSR.N	R.HIISATSLSTSphosPTELGSR.N	-1.10026	0.0742468	3	7	sp|Q5JSZ5|PRC2B_HUMAN	STYX	NR	0.9983	0.9995	0.982	0.956	EGGGRHIISATSLSTSPTELGSRNSSTGDGA
sp|Q9NR12|PDLI7_HUMAN_372	H.CFTCAACKTphosPIR.N	H.CFTCAACKTphosPIR.N	-1.10026	-0.273677	6	8	sp|Q9NR12|PDLI7_HUMAN	STYX	NR	1	1	0.978	0.986	KMTWHVHCFTCAACKTPIRNRAFYMEEGVPY
sp|Q9NYJ8|TAB2_HUMAN_527	R.KLSMGSphosDDAAYTQALLVHQK.A	R.KLSMGSphosDDAAYTQALLVHQK.A	-1.10026	0.266892	3	3	sp|Q9NYJ8|TAB2_HUMAN	STYX	NR	1	1	0.991	0.942	AHVDRISETRKLSMGSDDAAYTQALLVHQKA
sp|Q92917|GPKOW_HUMAN_216	K.GLGLGANLTEAQALTphosPTGPSR.M	K.GLGLGANLTEAQALTphosPTGPSR.M	-1.09412	-0.0188626	4	5	sp|Q92917|GPKOW_HUMAN	STYX	NR	1	1	0.996	0.995	KGLGLGANLTEAQALTPTGPSRMPRPDEEQE
sp|Q9H0D6|XRN2_HUMAN_678	R.RNSphosLGGDVLFVGK.H	R.RNSphosLGGDVLFVGK.H	-1.09255	0.0547796	4	6	sp|Q9H0D6|XRN2_HUMAN	STYX	NR	1	1	1	1	EEVYPDLTPEETRRNSLGGDVLFVGKHHPLH
sp|Q9NZM3|ITSN2_HUMAN_968	K.REEPEALYphosAAVNK.K	K.REEPEALYphosAAVNK.K	-1.08942	0.311286	6	17	sp|Q9NZM3|ITSN2_HUMAN	STYX	Q1	1	1	1	1	IIPGSEVKREEPEALYAAVNKKPTSAAYSVG
sp|Q13263|TIF1B_HUMAN_473	R.SphosGEGEVSGLMR.K	R.SRSphosGEGEVSGLMR.K	-1.08907	0.709835	48	74	sp|Q13263|TIF1B_HUMAN	STYX	Q1	1	1	0.998	0.998	YSSAEPHVSGVKRSRSGEGEVSGLMRKVPRV
sp|Q8IX01|SUGP2_HUMAN_315	R.KMSphosFDIIDK.S	R.KMSphosFDIIDK.S	-1.08907	0.396175	12	19	sp|Q8IX01|SUGP2_HUMAN	STYX	Q1	0.9999	1	1	1	LGLDLKNLRLPRRKMSFDIIDKSDVFSRFGI
sp|P16144|ITB4_HUMAN_1457	R.MDFAFPGSTNSphosLHR.M	R.MDFAFPGSTNSphosLHR.M	-1.08907	0.0870143	8	6	sp|P16144|ITB4_HUMAN	STYX	NR	1	1	0.982	0.988	LVNGRMDFAFPGSTNSLHRMTTTSAAAYGTH
sp|Q5T0W9|FA83B_HUMAN_664	R.SphosFPLFDNSK.A	R.SphosFPLFDNSK.A	-1.08907	-0.241255	2	1	sp|Q5T0W9|FA83B_HUMAN	STYX	NR	0.9987	0.9996	0.998	0.998	ENLKNQQTENLLKRRSFPLFDNSKANLDPGN
sp|Q9BQF6|SENP7_HUMAN_11 12 13_C	R.RP(SSS)phosEIITEGK.R	R.RP(SSS)phosEIITEGK.R	-1.08631	0.0348333	4	8	sp|Q9BQF6|SENP7_HUMAN	STYX	NR	1	1	1	1	_____MDKRKLGRRPSSSEIITEGKRKKSSS ____MDKRKLGRRPSSSEIITEGKRKKSSSD ___MDKRKLGRRPSSSEIITEGKRKKSSSDL
sp|Q09666|AHNK_HUMAN_5798	R.EFSGPSTPTGTphosLEFEGGEVSLEGGK.V	R.EFSGPSTPTGTphosLEFEGGEVSLEGGK.V	-1.08131	-0.340791	2	1	sp|Q09666|AHNK_HUMAN	STYX	Q4	0.9964	0.9633	0.974	0.704	FSDEREFSGPSTPTGTLEFEGGEVSLEGGKV
sp|P16144|ITB4_HUMAN_1454 1455_C	R.MDFAFPG(ST)phosNSLHR.M	R.MDFAFPG(ST)phosNSLHR.M	-1.07806	0.287165	4	4	sp|P16144|ITB4_HUMAN	STYX	Q1	1	0.9998	0.666	0.9	GEHLVNGRMDFAFPGSTNSLHRMTTTSAAAY EHLVNGRMDFAFPGSTNSLHRMTTTSAAAYG
sp|Q13557|KCC2D_HUMAN_287	R.QETphosVDCLK.K	R.QETphosVDCLK.K	-1.07806	-1.24447	4	6	sp|Q13557|KCC2D_HUMAN	STYX	Q4	0.9959	0.9998	1	1	ICQRSTVASMMHRQETVDCLKKFNARRKLKG
sp|O95644|NFAC1_HUMAN_233	R.GLGACTLLGSphosPR.H	R.GLGACTLLGSphosPR.H	-1.07789	0.562244	11	10	sp|O95644|NFAC1_HUMAN	STYX	Q1	1	1	0.998	0.997	EEGFPRGLGACTLLGSPRHSPSTSPRASVTE
sp|P07910|HNRPC_HUMAN_233	K.QAVEMKNDKSphosEEEQSSSSVK.K	K.NDKSphosEEEQSSSSVKK.D	-1.07789	0.401309	39	12	sp|P07910|HNRPC_HUMAN	STYX	Q1	1	1	0.999	0.998	EKEQSKQAVEMKNDKSEEEQSSSSVKKDETN
sp|Q8TF47|ZFP90_HUMAN_511	R.STSphosFIEHHR.L	R.STSphosFIEHHR.L	-1.07789	0.742625	3	3	sp|Q8TF47|ZFP90_HUMAN	STYX	Q1	0.9996	0.9998	0.987	0.986	PYQCNVCGKAFKRSTSFIEHHRIHTGEKPYE
sp|Q92576|PHF3_HUMAN_1722	K.VAQNSphosPSVENIQTSQAEQAKPLQEDILMQ.N	K.VAQNSphosPSVENIQTSQAEQAKPLQEDILMQNIETVHPFR.R	-1.07789	0.514694	5	2	sp|Q92576|PHF3_HUMAN	STYX	Q1	1	1	0.973	0.918	NSCVQQSDNLKVAQNSPSVENIQTSQAEQAK
sp|Q92841|DDX17_HUMAN_571	R.TTSphosSANNPNLMYQDECDRR.L	R.TTSphosSANNPNLMYQDECDRR.L	-1.07789	0.874222	1	2	sp|Q92841|DDX17_HUMAN	STYX	Q1	0.9954	1	0.973	0.957	GGGGGGGGRSRYRTTSSANNPNLMYQDECDR
sp|Q9BU76|MMTA2_HUMAN_123	R.LLGLGSphosASGSVGR.V	R.LLGLGSphosASGSVGR.V	-1.07789	1.23411	1	2	sp|Q9BU76|MMTA2_HUMAN	STYX	Q1	0.9998	0.9997	0.988	0.995	GDPEEKGVDRLLGLGSASGSVGRVAMSREDK
sp|Q9UGU0|TCF20_HUMAN_1369 1370_C	R.SA(SS)phosNSAEAGGDTVTLDDILSLK.S	R.RSA(SS)phosNSAEAGGDTVTLDDILSLK.S	-1.07789	0.619222	7	2	sp|Q9UGU0|TCF20_HUMAN	STYX	Q1	1	0.9987	0.994	0.982	AIVQKITSPNIRRSASSNSAEAGGDTVTLDD IVQKITSPNIRRSASSNSAEAGGDTVTLDDI
sp|O43491|E41L2_HUMAN_89	K.QKSYTphosLVVAK.D	K.QKSYTphosLVVAK.D	-1.07789	-0.426674	2	2	sp|O43491|E41L2_HUMAN	STYX	Q4	0.9874	0.9959	0.958	0.935	ISRFIPPWLKKQKSYTLVVAKDGGDKKEPTQ
sp|Q8TCJ2|STT3B_HUMAN_29	W.SGLMALGNSphosR.H	W.SGLMALGNSphosR.H	-1.07789	-0.778912	10	5	sp|Q8TCJ2|STT3B_HUMAN	STYX	Q4	1	1	1	0.989	SLNSSPWSGLMALGNSRHGHHGPGAQCAHKA
sp|A2AJT9|BCLA3_HUMAN_192	R.RGSphosEDFETR.S	R.RGSphosEDFETR.S	-1.07789	0.244172	1	1	sp|A2AJT9|BCLA3_HUMAN	STYX	NR	0.9873	0.9996	0.986	0.981	QRIQEEKYSQSTRRGSEDFETRSSFQKRYPE
sp|O75151|PHF2_HUMAN_705	R.DLSphosFLLDKK.A	K.RDLSphosFLLDKK.A	-1.07789	-0.0606828	3	2	sp|O75151|PHF2_HUMAN	STYX	NR	0.999	0.9998	1	1	EFPIRRKKNAPKRDLSFLLDKKAVLPTPVTK
sp|P49759|CLK1_HUMAN_341	K.VVDFGSATYDDEHHSTLVSphosTR.H	K.VVDFGSATYDDEHHSTLVSphosTR.H	-1.07789	-0.135961	3	2	sp|P49759|CLK1_HUMAN	STYX	NR	0.9992	0.9992	0.988	0.979	FGSATYDDEHHSTLVSTRHYRAPEVILALGW
sp|Q08999|RBL2_HUMAN_413	R.YIKENSphosPCVTPVSTATHSLSR.L	R.YIKENSphosPCVTPVSTATHSLSR.L	-1.07789	0.137257	3	9	sp|Q08999|RBL2_HUMAN	STYX	NR	1	1	0.999	0.999	RISTPLTGVRYIKENSPCVTPVSTATHSLSR
sp|Q12830|BPTF_HUMAN_1617	K.SHLLSSSphosDAEGNYR.D	K.SHLLSSSphosDAEGNYR.D	-1.07789	0.0217793	3	3	sp|Q12830|BPTF_HUMAN	STYX	NR	0.9997	0.9999	0.977	0.983	NERNSSETKSHLLSSSDAEGNYRDSLETLPS
sp|Q14126|DSG2_HUMAN_703	K.GSSSASphosIVK.G	K.GSSSASphosIVK.G	-1.07789	-0.171371	1	4	sp|Q14126|DSG2_HUMAN	STYX	NR	0.9938	0.9997	0.964	0.987	GGMAKEATMKGSSSASIVKGQHEMSEMDGRW
sp|Q15428|SF3A2_HUMAN_153	R.FMSphosAYEQR.L	R.FMSphosAYEQR.L	-1.07789	-0.103825	6	2	sp|Q15428|SF3A2_HUMAN	STYX	NR	0.9996	0.9996	0.995	0.985	YPEIAEGIMPRHRFMSAYEQRIEPPDRRWQY
sp|Q5THK1|PR14L_HUMAN_1484 1485_C	K.DTESC(TS)phosPCLLGAPR.K	K.DTESC(TS)phosPCLLGAPR.K	-1.07789	0.197629	1	5	sp|Q5THK1|PR14L_HUMAN	STYX	NR	1	1	0.906	0.992	EERLHHPLRKDTESCTSPCLLGAPRKAQDPS ERLHHPLRKDTESCTSPCLLGAPRKAQDPSS
sp|Q6PFW1|VIP1_HUMAN_1073	K.RFSphosVSFAK.H	K.RFSphosVSFAK.H	-1.07789	0.0217793	1	3	sp|Q6PFW1|VIP1_HUMAN	STYX	NR	0.9991	0.9998	0.963	0.968	KHRDELLFVPAVKRFSVSFAKHPTNGFEGCS
sp|Q6ZRQ5|MMS22_HUMAN_338	R.RSSphosMPVIQSR.D	R.SSphosMPVIQSR.D	-1.07789	0.16171	1	7	sp|Q6ZRQ5|MMS22_HUMAN	STYX	NR	0.9999	1	0.98	0.97	LLKTLLEKSSDRRRSSMPVIQSRDPLGFSWW
sp|Q71F56|MD13L_HUMAN_397 398_C	R.SQM(ST)phosPTLEEEPASNPATWDFVDPTQR.V	R.SQM(ST)phosPTLEEEPASNPATWDFVDPTQR.V	-1.07789	0.197629	3	3	sp|Q71F56|MD13L_HUMAN	STYX	NR	0.9948	0.9969	0.512	0.978	KECILNRTQSKRSQMSTPTLEEEPASNPATW ECILNRTQSKRSQMSTPTLEEEPASNPATWD
sp|Q8WWQ0|PHIP_HUMAN_1315	R.AQSphosYDIQAWK.K	R.AQSphosYDIQAWK.K	-1.07789	0.0350762	11	7	sp|Q8WWQ0|PHIP_HUMAN	STYX	NR	1	1	0.992	0.995	RKDHQPRRRLRNRAQSYDIQAWKKQCEELLN
sp|Q96FZ2|HMCES_HUMAN_160	K.SGSIGAADSphosPENWEK.V	K.SGSIGAADSphosPENWEK.V	-1.07789	0.266892	1	3	sp|Q96FZ2|HMCES_HUMAN	STYX	NR	0.9963	1	0.997	0.999	PQIKTEKSGSIGAADSPENWEKVWDNWRLLT
sp|Q9C0B0|UNK_HUMAN_158	R.SphosPVYDIR.E	R.SphosPVYDIR.E	-1.07789	0.266848	1	2	sp|Q9C0B0|UNK_HUMAN	STYX	NR	0.9997	0.9998	0.89	0.986	NGLHCAFAHGPHDLRSPVYDIRELQAMEALQ
sp|Q9GZY8|MFF_HUMAN_155	R.ERSphosMSENAVR.Q	R.SphosMSENAVR.Q	-1.07789	-0.089252	13	3	sp|Q9GZY8|MFF_HUMAN	STYX	NR	0.9965	0.9939	0.992	0.992	QNEEIRAVGRLKRERSMSENAVRQNGQLVRN
sp|Q9P2M4|TBC14_HUMAN_91	R.KQSphosDSDLIPER.A	R.KQSphosDSDLIPER.A	-1.07789	0.184966	1	6	sp|Q9P2M4|TBC14_HUMAN	STYX	NR	0.9995	1	0.76	0.98	PEPVPCSAVHVRRKQSDSDLIPERAFQSACA
sp|Q9BZL4|PP12C_HUMAN_398 399_C	R.TLNGV(SS)phosPPHPSPK.S	R.TLNGV(SS)phosPPHPSPK.S	-1.0694	-0.358173	2	14	sp|Q9BZL4|PP12C_HUMAN	STYX	Q4	1	1	1	1	PTEPPPAEPRTLNGVSSPPHPSPKSPVQLEE TEPPPAEPRTLNGVSSPPHPSPKSPVQLEEA
sp|Q9Y2W1|TR150_HUMAN_310	Q.GQFDHGSGSLSphosPSKK.S	Q.GQFDHGSGSLSphosPSKK.S	-1.06907	-0.163253	2	1	sp|Q9Y2W1|TR150_HUMAN	STYX	NR	0.9937	0.9752	0.984	0.958	SGTHQGQFDHGSGSLSPSKKSPVGKSPPSTG
sp|P78347|GTF2I_HUMAN_103	R.MSphosVDAVEIETLR.K	R.MSphosVDAVEIETLRK.T	-1.06688	0.412297	6	6	sp|P78347|GTF2I_HUMAN	STYX	Q1	1	1	0.999	0.999	AEMHKMKSTTQANRMSVDAVEIETLRKTVED
sp|Q9UQ35|SRRM2_HUMAN_1257	K.SEEPAGQILSHLSphosSELK.E	K.SEEPAGQILSHLSphosSELK.E	-1.06688	0.58882	4	5	sp|Q9UQ35|SRRM2_HUMAN	STYX	Q1	1	1	0.968	0.976	VEKSEEPAGQILSHLSSELKEMSTSNFESSP
sp|P05783|K1C18_HUMAN_100	R.SphosLETENR.R	R.SphosLETENR.R	-1.06688	-0.178519	4	5	sp|P05783|K1C18_HUMAN	STYX	NR	0.9938	0.9989	0.993	0.996	QSLNDRLASYLDRVRSLETENRRLESKIREH
sp|Q8WXI9|P66B_HUMAN_134 135_C	R.LTPSPDIIVLSDNEA(SS)phosPR.S	R.LTPSPDIIVLSDNEA(SS)phosPR.S	-1.06252	0.0613077	4	11	sp|Q8WXI9|P66B_HUMAN	STYX	NR	1	1	0.998	0.99	LTPSPDIIVLSDNEASSPRSSSRMEERLKAA TPSPDIIVLSDNEASSPRSSSRMEERLKAAN
sp|Q09666|AHNK_HUMAN_2708	K.ISphosMPDIDLNLK.G	K.ISphosMPDIDLNLK.G	-1.05736	0.221088	8	15	sp|Q09666|AHNK_HUMAN	STYX	NR	0.9997	1	1	1	PKFKMPEMNIKAPKISMPDIDLNLKGPKVKG
sp|Q9UQ35|SRRM2_HUMAN_1318 1320	K.ELSphosNSphosPLRENSFGSPLEFR.N	K.ELSphosNSphosPLRENSFGSPLEFR.N	-1.05736	-0.257375	4	1	sp|Q9UQ35|SRRM2_HUMAN	STYX	NR	0.9947	0.9945	0.99	0.522	SSWGGPHFSPEHKELSNSPLRENSFGSPLEF WGGPHFSPEHKELSNSPLRENSFGSPLEFRN
sp|Q8WXG6|MADD_HUMAN_1239	R.GTLSphosDSEIETNSATSTIFGK.A	R.GTLSphosDSEIETNSATSTIFGK.A	-1.05686	0.0350762	6	8	sp|Q8WXG6|MADD_HUMAN	STYX	NR	0.9991	0.9994	0.995	0.995	GGEGSVHLASSRGTLSDSEIETNSATSTIFG
sp|Q9UKV3|ACINU_HUMAN_863	K.KPSphosISITTESLK.S	K.KPSphosISITTESLK.S	-1.05603	0.570673	8	15	sp|Q9UKV3|ACINU_HUMAN	STYX	Q1	1	1	0.998	0.997	KRRWGASTATTQKKPSISITTESLKSLIPDI
sp|O15264|MK13_HUMAN_350	K.EIVNFSphosPIAR.K	K.EIVNFSphosPIAR.K	-1.05586	0.28926	3	1	sp|O15264|MK13_HUMAN	STYX	Q1	0.9972	0.9999	1	1	VDEWKQHIYKEIVNFSPIARKDSRRRSGMKL
sp|P21333|FLNA_HUMAN_2336	R.RLTphosVSSL.Q	R.RLTphosVSSLQESGLK.V	-1.05586	0.332981	7	15	sp|P21333|FLNA_HUMAN	STYX	Q1	1	1	0.996	0.997	FVVPVASPSGDARRLTVSSLQESGLKVNQPA
sp|Q13469|NFAC2_HUMAN_255	R.RHSphosCAEAL.V	R.RHSphosCAEALVALPPGASPQR.S	-1.05586	1.21526	1	5	sp|Q13469|NFAC2_HUMAN	STYX	Q1	0.9254	1	1	0.999	RPASRSSSPGAKRRHSCAEALVALPPGASPQ
sp|Q49A26|GLYR1_HUMAN_130	R.KLSphosLSEGK.V	R.KLSphosLSEGK.V	-1.05586	0.354355	7	8	sp|Q49A26|GLYR1_HUMAN	STYX	Q1	0.9992	0.9993	0.983	0.977	EERSRPNSGDEKRKLSLSEGKVKKNMGEGKK
sp|Q6IQ23|PKHA7_HUMAN_1013	R.YQTphosLPGR.G	R.YQTphosLPGR.G	-1.05586	1.70152	1	1	sp|Q6IQ23|PKHA7_HUMAN	STYX	Q1	0.988	0.9773	0.96	0.924	AQPSLGLVGPESRYQTLPGRGLSGSTSRLQQ
sp|Q8NEY8|PPHLN_HUMAN_110	K.SphosFYSSHYAR.E	K.SphosFYSSHYAR.E	-1.05586	0.28926	3	1	sp|Q8NEY8|PPHLN_HUMAN	STYX	Q1	0.9994	0.9999	0.992	0.879	RQPEYRDMRDGFRRKSFYSSHYARERSPYKR
sp|Q92844|TANK_HUMAN_384	R.GPQQPIWKPFPNQDSDSVVLSphosGTDSELHIPR.V	R.GPQQPIWKPFPNQDSDSVVLSphosGTDSELHIPR.V	-1.05586	1.02844	1	1	sp|Q92844|TANK_HUMAN	STYX	Q1	0.9926	0.9931	0.725	0.987	IWKPFPNQDSDSVVLSGTDSELHIPRVCEFC
sp|Q96RE7|NACC1_HUMAN_150 151_C	K.VSSPSCDSQGLHAEEAPSSEPQSPVAQ(TS)phosGWPACSTPLPLVSR.V	K.VSSPSCDSQGLHAEEAPSSEPQSPVAQ(TS)phosGWPACSTPLPLVSR.V	-1.05586	0.70152	1	1	sp|Q96RE7|NACC1_HUMAN	STYX	Q1	0.9801	0.9807	0.66	0.664	AEEAPSSEPQSPVAQTSGWPACSTPLPLVSR EEAPSSEPQSPVAQTSGWPACSTPLPLVSRV
sp|Q9H0D6|XRN2_HUMAN_439	R.DQPAFTPSGILTphosPHALGSR.N	R.DQPAFTPSGILTphosPHALGSRNSPGSQVASNPR.Q	-1.05586	0.311286	1	1	sp|Q9H0D6|XRN2_HUMAN	STYX	Q1	0.9999	0.9878	0.795	0.583	RMKRDQPAFTPSGILTPHALGSRNSPGSQVA
sp|Q9P266|JCAD_HUMAN_982 983_C	R.(SS)phosDAKPLPASYPAEPR.E	R.(SS)phosDAKPLPASYPAEPR.E	-1.05586	0.406443	1	7	sp|Q9P266|JCAD_HUMAN	STYX	Q1	0.9785	1	0.596	1	ELAGSPFPVTRMSSRSSDAKPLPASYPAEPR LAGSPFPVTRMSSRSSDAKPLPASYPAEPRE
sp|O60318|GANP_HUMAN_425	R.SESTDSphosLGGLSPSEVTAIQCK.N	R.SESTDSphosLGGLSPSEVTAIQCK.N	-1.05586	-0.375556	1	1	sp|O60318|GANP_HUMAN	STYX	Q4	0.9279	0.9917	0.98	0.475	RGTPARQSNRSESTDSLGGLSPSEVTAIQCK
sp|P35658|NU214_HUMAN_201	T.SVCWSphosPK.G	T.SVCWSphosPK.G	-1.05586	-0.755828	1	3	sp|P35658|NU214_HUMAN	STYX	Q4	0.9893	1	0.997	0.998	CATLPSTVAVTSVCWSPKGKQLAVGKQNGTV
sp|P49759|CLK1_HUMAN_341 342_C	K.VVDFGSATYDDEHHSTLV(ST)phosR.H	K.VVDFGSATYDDEHHSTLV(ST)phosR.H	-1.05586	-0.273677	3	12	sp|P49759|CLK1_HUMAN	STYX	Q4	1	0.9999	0.835	0.99	FGSATYDDEHHSTLVSTRHYRAPEVILALGW GSATYDDEHHSTLVSTRHYRAPEVILALGWS
sp|Q02952|AKA12_HUMAN_885	K.ELSphosESQVHMMAAAVADGTR.A	K.ELSphosESQVHMMAAAVADGTR.A	-1.05586	-0.290451	1	2	sp|Q02952|AKA12_HUMAN	STYX	Q4	0.9998	1	0.8	0.499	EQPEQKAATEVSKELSESQVHMMAAAVADGT
sp|Q15022|SUZ12_HUMAN_541	K.ASMSphosEFLESEDGEVEQQR.T	K.ASMSphosEFLESEDGEVEQQR.T	-1.05586	-0.340791	1	1	sp|Q15022|SUZ12_HUMAN	STYX	Q4	0.9859	0.9983	0.529	0.447	THILVCRPKRTKASMSEFLESEDGEVEQQRT
sp|Q9BXB4|OSB11_HUMAN_177 178 179_C	R.SFSLA(SSS)phosNSPISQR.R	R.SFSLA(SSS)phosNSPISQR.R	-1.05586	-0.523787	3	8	sp|Q9BXB4|OSB11_HUMAN	STYX	Q4	0.9874	0.9994	0.862	0.929	GKNNPPLKSRSFSLASSSNSPISQRRPSQNA KNNPPLKSRSFSLASSSNSPISQRRPSQNAI NNPPLKSRSFSLASSSNSPISQRRPSQNAIS
sp|P21291|CSRP1_HUMAN_81 82_C	K.GYGYGQGAGTL(ST)phosDKGESLGIK.H	K.GYGYGQGAGTL(ST)phosDKGESLGIK.H	-1.05586	0.0217793	1	1	sp|P21291|CSRP1_HUMAN	STYX	NR	0.9859	0.995	0.512	0.674	YGPKGYGYGQGAGTLSTDKGESLGIKHEEAP GPKGYGYGQGAGTLSTDKGESLGIKHEEAPG
sp|P55196|AFAD_HUMAN_1275	R.SphosQEELREDK.A	R.VTRSphosQEELR.E	-1.05586	0.0350154	16	12	sp|P55196|AFAD_HUMAN	STYQ	NR	1	1	1	1	TDSNHSSIAIQRVTRSQEELREDKAYQLERH
sp|P78364|PHC1_HUMAN_861 862 863_C	R.R(SSS)phosDIAR.A	R.R(SSS)phosDIAR.A	-1.05586	-0.00518771	3	1	sp|P78364|PHC1_HUMAN	STYX	NR	0.9976	0.9848	1	1	QEANYARVRRRGPRRSSSDIARAKIQGKCHR EANYARVRRRGPRRSSSDIARAKIQGKCHRG ANYARVRRRGPRRSSSDIARAKIQGKCHRGQ
sp|Q12888|TP53B_HUMAN_315 316_C	K.TV(SS)phosDGCSTPSREEGGCSLASTPATTLHLLQLSGQR.S	K.TV(SS)phosDGCSTPSREEGGCSLASTPATTLHLLQLSGQR.S	-1.05586	0.0482515	1	1	sp|Q12888|TP53B_HUMAN	STYX	NR	0.9313	0.9927	0.488	0.664	LSTQEDLFDQSNKTVSSDGCSTPSREEGGCS STQEDLFDQSNKTVSSDGCSTPSREEGGCSL
sp|Q92797|SYMPK_HUMAN_494	R.RLSphosAQGQAISVVGSL.S	R.RLSphosAQGQAISVVGSLSSMSPLEEEAPQAK.R	-1.05586	0.197629	31	26	sp|Q92797|SYMPK_HUMAN	STYX	NR	1	1	1	0.999	EKVVKTESVLIKRRLSAQGQAISVVGSLSSM
sp|Q92841|DDX17_HUMAN_599	R.RDSphosASYR.D	R.RDSphosASYR.D	-1.05586	0.118627	13	10	sp|Q92841|DDX17_HUMAN	STYX	NR	0.9937	0.9966	0.991	0.987	CDRRLRGVKDGGRRDSASYRDRSETDRAGYA
sp|Q99700|ATX2_HUMAN_431	R.DNSphosEEFLKR.E	R.DNSphosEEFLKR.E	-1.05586	-0.133195	3	3	sp|Q99700|ATX2_HUMAN	STYX	NR	0.9985	0.9999	1	1	DSSLSSYTVPLERDNSEEFLKREARANQLAE
sp|Q9BZ72|PITM2_HUMAN_1277	R.KGSphosFGLPGQGDFLR.S	R.KGSphosFGLPGQGDFLR.S	-1.05586	-0.089252	3	7	sp|Q9BZ72|PITM2_HUMAN	STYX	NR	0.9999	1	1	1	RPARNTATRMALRKGSFGLPGQGDFLRSRNH
sp|Q9H4A6|GOLP3_HUMAN_8 9_C	R.(SS)phosGLVQR.R	R.(SS)phosGLVQR.R	-1.05586	0.118627	4	2	sp|Q9H4A6|GOLP3_HUMAN	STYX	NR	0.9981	0.9978	1	1	________MTSLTQRSSGLVQRRTEASRNAA _______MTSLTQRSSGLVQRRTEASRNAAD
sp|Q9NWH9|SLTM_HUMAN_551 553	R.ISSphosKSphosPGHMVILDQTK.G	R.ISSphosKSphosPGHMVILDQTK.G	-1.05586	0.0740167	15	14	sp|Q9NWH9|SLTM_HUMAN	STYX	NR	1	1	0.988	0.99	TSESIKKSEEKKRISSKSPGHMVILDQTKGD ESIKKSEEKKRISSKSPGHMVILDQTKGDHC
sp|Q9Y618|NCOR2_HUMAN_1251	R.IIGEDSphosPSRLDR.G	R.IIGEDSphosPSRLDR.G	-1.05586	-0.186234	3	6	sp|Q9Y618|NCOR2_HUMAN	STYX	NR	0.9982	0.9984	0.993	0.993	DVLYKGTITRIIGEDSPSRLDRGREDSLPKG
sp|Q8IY33|MILK2_HUMAN_153	R.KPPLSphosPAQTNPVVQR.R	R.KPPLSphosPAQTNPVVQR.R	-1.0519	-0.0606828	2	7	sp|Q8IY33|MILK2_HUMAN	STYX	NR	1	1	0.998	0.997	AAKLPSPAPARKPPLSPAQTNPVVQRRNEGA
sp|Q9UKJ3|GPTC8_HUMAN_976	R.SphosTTAHSWQR.S	R.SphosTTAHSWQR.S	-1.04829	0.0870708	2	1	sp|Q9UKJ3|GPTC8_HUMAN	STYX	NR	0.9928	0.9986	0.92	0.947	RSSSCSRSRSKRRSRSTTAHSWQRSRSYSRD
sp|O95402|MED26_HUMAN_470	K.ASLQSphosPFEQTNWK.E	K.ASLQSphosPFEQTNWK.E	-1.04534	0.917944	2	1	sp|O95402|MED26_HUMAN	STYX	Q1	0.9997	0.9982	0.995	0.991	SRTELDKQEAKASLQSPFEQTNWKELSRNEI
sp|Q15020|SART3_HUMAN_769	K.SphosVEGRPM.F	K.SphosVEGRPMFVSPCVDK.S	-1.04534	0.0870708	6	8	sp|Q15020|SART3_HUMAN	STYX	NR	1	1	1	0.986	KEEKSALQALEMDRKSVEGRPMFVSPCVDKS
sp|Q10570|CPSF1_HUMAN_766	R.RSSphosQPPADRDPAPFR.A	R.RSSphosQPPADRDPAPFR.A	-1.04502	0.913987	2	10	sp|Q10570|CPSF1_HUMAN	STYQ	Q1	0.9993	1	0.977	0.979	SGSLFSPSKEEARRSSQPPADRDPAPFRAEP
sp|Q6KC79|NIPBL_HUMAN_591 592_C	K.QCNDAPVSVLQEDIVGSLK(ST)phosPENHPETPK.K	K.QCNDAPVSVLQEDIVGSLK(ST)phosPENHPETPK.K	-1.04502	1.55229	6	7	sp|Q6KC79|NIPBL_HUMAN	STYX	Q1	0.9956	0.975	0.992	0.988	APVSVLQEDIVGSLKSTPENHPETPKKKSDP PVSVLQEDIVGSLKSTPENHPETPKKKSDPE
tr|I3L2J0|I3L2J0_HUMAN_227	R.RSphosQDLGVQFPGDR.A	R.SphosQDLGVQFPGDR.A	-1.04502	0.375378	8	10	tr|I3L2J0|I3L2J0_HUMAN	STYQ	Q1	1	1	1	1	GDGLFLPAVVRQVRRSQDLGVQFPGDRALTF
sp|Q9HBD1|RC3H2_HUMAN_982 983 984_C	R.KH(SST)phosGDLLSLELQ.Q	K.H(SST)phosGDLLSLELQQAK.S	-1.04469	-0.0326684	2	7	sp|Q9HBD1|RC3H2_HUMAN	STYX	NR	1	1	0.999	0.999	RDRFIVTDLSGHRKHSSTGDLLSLELQQAKS DRFIVTDLSGHRKHSSTGDLLSLELQQAKSN RFIVTDLSGHRKHSSTGDLLSLELQQAKSNS
sp|Q86YV5|PRAG1_HUMAN_729	K.MNKSphosSSDLEK.V	K.MNKSphosSSDLEK.V	-1.04453	0.0613077	2	3	sp|Q86YV5|PRAG1_HUMAN	STYX	NR	0.99	0.9983	0.966	0.957	PPPPPKSRHLLKMNKSSSDLEKVSQGSAESL
sp|P19174|PLCG1_HUMAN_1263	R.YQQPFEDFRISphosQEHLADHFDSR.E	R.YQQPFEDFRISphosQEHLADHFDSR.E	-1.04257	-1.03267	4	5	sp|P19174|PLCG1_HUMAN	STYQ	Q4	1	1	0.997	0.999	SFESRYQQPFEDFRISQEHLADHFDSRERRA
sp|Q15311|RBP1_HUMAN_30 34	R.TPSSphosEEISphosPTKFPGLYR.T	R.TPSSphosEEISphosPTKFPGLYR.T	-1.04111	-0.667019	2	5	sp|Q15311|RBP1_HUMAN	STYX	Q4	0.9872	0.9852	0.987	0.991	HRRVEHGSGLTRTPSSEEISPTKFPGLYRTG EHGSGLTRTPSSEEISPTKFPGLYRTGEPSP
sp|P28290|ITPI2_HUMAN_1044 1045_C	R.(SS)phosALMGMCGSR.S	R.(SS)phosALMGMCGSR.S	-1.04046	-0.0326684	2	5	sp|P28290|ITPI2_HUMAN	STYX	NR	0.9988	0.9999	1	1	LEEQLRAVRMPSPFRSSALMGMCGSRSADNL EEQLRAVRMPSPFRSSALMGMCGSRSADNLS
sp|O60437|PEPL_HUMAN_13 14_C	K.GK(YS)phosPTVQTR.S	K.GK(YS)phosPTVQTR.S	-1.04014	-0.0188626	2	1	sp|O60437|PEPL_HUMAN	STYX	NR	0.9951	0.9921	0.924	0.962	___MNSLFRKRNKGKYSPTVQTRSISNKELS __MNSLFRKRNKGKYSPTVQTRSISNKELSE
sp|P49792|RBP2_HUMAN_1110	K.NVSGISphosFTENMGSSQQK.N	K.NVSGISphosFTENMGSSQQK.N	-1.0382	-0.447706	4	8	sp|P49792|RBP2_HUMAN	STYX	Q4	0.9983	1	0.995	0.994	PRNTFNFGSKNVSGISFTENMGSSQQKNSGF
sp|P54132|BLM_HUMAN_171	K.SFVTphosPPQSHFVR.V	K.SFVTphosPPQSHFVR.V	-1.03562	1.36755	4	10	sp|P54132|BLM_HUMAN	STYX	Q1	0.9996	1	0.993	0.995	DMDDFDTSETSKSFVTPPQSHFVRVSTAQKS
sp|P10109|ADX_HUMAN_63	R.SSSphosEDKITVHFINR.D	R.SSSphosEDKITVHFINR.D	-1.03562	-0.306843	2	4	sp|P10109|ADX_HUMAN	STYX	Q4	0.9998	1	0.986	0.987	EASRSLSVSARARSSSEDKITVHFINRDGET
sp|Q13033|STRN3_HUMAN_207	R.SLLGLSphosNSEPNGSVETK.N	R.SLLGLSphosNSEPNGSVETK.N	-1.03497	1.13108	2	1	sp|Q13033|STRN3_HUMAN	STYX	Q1	1	0.9981	0.992	0.99	ILDVRSQRVRSLLGLSNSEPNGSVETKNLEQ
sp|Q8IWI9|MGAP_HUMAN_3059	K.LGNSGASphosPSSAGK.-	K.LGNSGASphosPSSAGK.-	-1.03481	0.375416	8	5	sp|Q8IWI9|MGAP_HUMAN	STYX	Q1	1	1	0.991	0.99	PTLAPVVAKLGNSGASPSSAGK_________
sp|Q9HCM1|RESF1_HUMAN_1740	R.SphosLGSSPVK.-	R.SphosLGSSPVK.-	-1.03433	0.917944	2	3	sp|Q9HCM1|RESF1_HUMAN	STYX	Q1	0.9987	0.9988	0.921	0.957	MFQTYKQMYLEKRSRSLGSSPVK________
sp|Q92794|KAT6A_HUMAN_1089 1090_C	R.RL(SS)phosQDVLR.C	R.RL(SS)phosQDVLR.C	-1.03433	-0.0466076	8	3	sp|Q92794|KAT6A_HUMAN	STYQ	NR	0.9998	0.9994	1	1	EDENELFPREYFRRLSSQDVLRCQSSSKRKS DENELFPREYFRRLSSQDVLRCQSSSKRKSK
sp|Q96SD1|DCR1C_HUMAN_688	R.KCSphosLLDT.-	R.KCSphosLLDT.-	-1.03433	0.232676	4	1	sp|Q96SD1|DCR1C_HUMAN	STYX	NR	0.9996	0.9871	0.998	0.994	KLATGESIAVKKRKCSLLDT___________
sp|P02545|LMNA_HUMAN_423	R.KLESphosTESR.S	R.KLESphosTESR.S	-1.03417	0.266848	14	16	sp|P02545|LMNA_HUMAN	STYX	Q1	0.9982	0.9998	0.98	0.987	QTQGGGSVTKKRKLESTESRSSFSQHARTSG
sp|P43243|MATR3_HUMAN_188	R.RDSphosFDDR.G	R.RDSphosFDDR.G	-1.03417	0.476345	165	129	sp|P43243|MATR3_HUMAN	STYX	Q1	1	1	1	1	VPRDDWEEKRHFRRDSFDDRGPSLNPVLDYD
sp|Q13469|NFAC2_HUMAN_759	K.SLSphosPSLLGYQQPALMAAPLSLADAHR.S	K.SLSphosPSLLGYQQPALMAAPLSLADAHR.S	-1.03417	0.61562	1	2	sp|Q13469|NFAC2_HUMAN	STYX	Q1	1	1	0.942	0.983	QQNPAAVLYQRSKSLSPSLLGYQQPALMAAP
sp|Q5THK1|PR14L_HUMAN_1641 1642_C	R.RC(SS)phosELLPMAK.S	R.RC(SS)phosELLPMAK.S	-1.03417	0.896543	5	2	sp|Q5THK1|PR14L_HUMAN	STYX	Q1	0.9998	0.9991	1	1	LAPAMKTQKLRYRRCSSELLPMAKSYKRLRY APAMKTQKLRYRRCSSELLPMAKSYKRLRYK
sp|Q6UB99|ANR11_HUMAN_834	K.FSLSphosDDQR.D	K.FSLSphosDDQR.D	-1.03417	0.476345	5	3	sp|Q6UB99|ANR11_HUMAN	STYX	Q1	0.9999	0.9973	0.986	0.993	NKNQFLENEDTKFSLSDDQRDRWFSDLSDSS
sp|Q8IWA0|WDR75_HUMAN_809	K.VQDTSNTGLGEDIIHQLSphosKSEEK.E	K.VQDTSNTGLGEDIIHQLSphosKSEEK.E	-1.03417	0.426763	1	3	sp|Q8IWA0|WDR75_HUMAN	STYX	Q1	0.9898	0.9999	0.499	0.919	DTSNTGLGEDIIHQLSKSEEKELRKFRKIDY
sp|Q8N2U9|S66A2_HUMAN_112	R.SFTphosAADSKDEEVK.V	R.SFTphosAADSKDEEVK.V	-1.03417	0.300315	3	1	sp|Q8N2U9|S66A2_HUMAN	STYX	Q1	1	0.9487	0.973	0.608	EVRVANELNARRRSFTAADSKDEEVKVAPRR
sp|Q96T58|MINT_HUMAN_623	R.RASphosYDYNQDR.T	R.RASphosYDYNQDR.T	-1.03417	1.00066	3	2	sp|Q96T58|MINT_HUMAN	STYX	Q1	0.9991	0.9998	0.965	0.944	DFYEMLAERREERRASYDYNQDRTYYESVRT
sp|Q9BWU0|NADAP_HUMAN_530	K.ASSQVLSESphosPSQDSLDAFMSEMK.S	K.ASSQVLSESphosPSQDSLDAFMSEMK.S	-1.03417	2.54069	5	1	sp|Q9BWU0|NADAP_HUMAN	STYX	Q1	0.9976	0.9966	0.996	0.595	EISERLKASSQVLSESPSQDSLDAFMSEMKS
sp|Q9HB58|SP110_HUMAN_194	R.STSphosVTNDKLTSK.M	R.STSphosVTNDKLTSK.M	-1.03417	1.42171	1	1	sp|Q9HB58|SP110_HUMAN	STYX	Q1	0.9974	0.9984	0.993	0.992	PVLPLPALIQEGRSTSVTNDKLTSKMNAEED
tr|J3QRK0|J3QRK0_HUMAN_61 62_C	R.DYSTL(TS)phosVSSHGELHR.L	R.DYSTL(TS)phosVSSHGELHR.L	-1.03417	1.61119	1	1	tr|J3QRK0|J3QRK0_HUMAN	STYX	Q1	0.9993	0.9977	0.789	0.34	EHSHSTTLPRDYSTLTSVSSHGELHRLNIPN HSHSTTLPRDYSTLTSVSSHGELHRLNIPNP
sp|Q6PL18|ATAD2_HUMAN_1243	R.NNSphosNTCNIENELEDSR.K	R.NNSphosNTCNIENELEDSR.K	-1.03417	-0.4335	1	2	sp|Q6PL18|ATAD2_HUMAN	STYX	Q4	0.9996	1	0.5	0.982	KQQNASESKLELRNNSNTCNIENELEDSRKT
sp|Q86V48|LUZP1_HUMAN_574	R.RSSphosSEGLSK.G	R.RSSphosSEGLSK.G	-1.03417	-0.761851	3	2	sp|Q86V48|LUZP1_HUMAN	STYX	Q4	0.9995	0.9997	0.954	0.932	GCSKAIGALASSRRSSSEGLSKGKKAANGLE
sp|O75643|U520_HUMAN_26	K.ANSNLVLQADRSphosLIDR.T	K.ANSNLVLQADRSphosLIDR.T	-1.03417	-0.0965018	5	4	sp|O75643|U520_HUMAN	STYX	NR	1	1	0.997	0.998	YEYKANSNLVLQADRSLIDRTRRDEPTGEVL
sp|O95071|UBR5_HUMAN_1226 1227_C	K.R(TS)phosPTAYCDCWEK.C	K.R(TS)phosPTAYCDCWEK.C	-1.03417	0.16171	1	1	sp|O95071|UBR5_HUMAN	STYX	NR	0.9964	1	0.874	0.864	CARVCHKGHDCKLKRTSPTAYCDCWEKCKCK ARVCHKGHDCKLKRTSPTAYCDCWEKCKCKT
sp|P08727|K1C19_HUMAN_22	S.SFGGLGGGSphosVR.F	R.QSSATSSFGGLGGGSphosVR.F	-1.03417	-0.089252	17	1	sp|P08727|K1C19_HUMAN	STYX	NR	1	0.9993	0.997	0.962	RQSSATSSFGGLGGGSVRFGPGVAFRAPSIH
sp|P16144|ITB4_HUMAN_1494	R.DYNSphosLTR.S	R.DYNSphosLTR.S	-1.03417	0.0217793	2	4	sp|P16144|ITB4_HUMAN	STYX	NR	0.9965	0.9979	0.989	0.988	HRVLSTSSTLTRDYNSLTRSEHSHSTTLPRD
sp|Q14202|ZMYM3_HUMAN_1045	R.LVLSphosESCSR.D	R.LVLSphosESCSR.D	-1.03417	0.244172	9	5	sp|Q14202|ZMYM3_HUMAN	STYX	NR	0.9979	0.9996	0.984	0.989	DLPRTMRKGQKRLVLSESCSRDSMSSQPSCT
sp|Q8ND76|CCNY_HUMAN_73	R.ASTIFLSKSphosQTDVR.E	R.ASTIFLSKSphosQTDVR.E	-1.03417	0.0997818	3	3	sp|Q8ND76|CCNY_HUMAN	STYQ	NR	0.9997	0.999	0.953	0.981	NPSDHPRASTIFLSKSQTDVREKRKSLFINH
sp|Q9H6H4|REEP4_HUMAN_150	R.SphosFSMQDLR.S	R.LRSphosFSMQDLR.S	-1.03417	0.124873	7	9	sp|Q9H6H4|REEP4_HUMAN	STYX	NR	0.9996	0.9999	0.994	0.994	QAATKSQGALAGRLRSFSMQDLRSISDAPAP
sp|Q9H8G2|CAAP1_HUMAN_89 90_C	R.(ST)phosDSSSVSGSLQQETK.Y	R.(ST)phosDSSSVSGSLQQETK.Y	-1.03417	0.244172	11	9	sp|Q9H8G2|CAAP1_HUMAN	STYX	NR	0.9976	0.9988	0.998	0.998	WGGSSVERSERRKRRSTDSSSVSGSLQQETK GGSSVERSERRKRRSTDSSSVSGSLQQETKY
sp|Q9P035|HACD3_HUMAN_135	R.LESphosEGSPETLTNLR.K	R.LESphosEGSPETLTNLR.K	-1.03417	-0.14067	6	6	sp|Q9P035|HACD3_HUMAN	STYX	NR	1	0.9999	0.998	0.996	LRAKEEERLNKLRLESEGSPETLTNLRKGYL
sp|Q9P2D1|CHD7_HUMAN_2533	K.RTSphosLSAEDAEVTK.A	K.RTSphosLSAEDAEVTK.A	-1.03417	0.0391326	3	4	sp|Q9P2D1|CHD7_HUMAN	STYX	NR	1	1	0.969	0.976	NVEGLDLLFMSHKRTSLSAEDAEVTKAFEED
sp|Q9UK61|TASOR_HUMAN_1551 1552_C	K.NTQIELQ(SS)phosPDVQNSLLEDK.T	K.NTQIELQ(SS)phosPDVQNSLLEDK.T	-1.03417	-0.133886	3	10	sp|Q9UK61|TASOR_HUMAN	STYX	NR	0.9999	1	1	1	SRGTDQKKNTQIELQSSPDVQNSLLEDKTYL RGTDQKKNTQIELQSSPDVQNSLLEDKTYLD
sp|Q9UQ35|SRRM2_HUMAN_1112	R.SSSPVTELASRSphosPIRQDR.G	S.PVTELASRSphosPIR.Q	-1.03417	0.0535971	1	4	sp|Q9UQ35|SRRM2_HUMAN	STYX	NR	0.9994	1	0.853	0.982	GRSRSSSPVTELASRSPIRQDRGEFSASPML
sp|Q9Y2W1|TR150_HUMAN_377	K.GSphosFSDTGLGDGK.M	K.IKEKGSphosFSDTGLGDGK.M	-1.03417	0.255577	31	29	sp|Q9Y2W1|TR150_HUMAN	STYX	NR	1	1	0.993	0.997	QKQTNTDKEKIKEKGSFSDTGLGDGKMKSDS
sp|Q9H2H9|S38A1_HUMAN_52 54	R.SphosLTphosNSHLEK.K	R.SphosLTphosNSHLEK.K	-1.0308	-0.0265587	2	4	sp|Q9H2H9|S38A1_HUMAN	STYX	NR	0.9725	0.9997	0.78	0.672	GQINSKFISDRESRRSLTNSHLEKKKCDEYI INSKFISDRESRRSLTNSHLEKKKCDEYIPG
sp|Q9H9B1|EHMT1_HUMAN_1048	K.YVSQNCVTSphosPMNIDR.N	N.CVTSphosPMNIDR.N	-1.03048	-0.466322	4	3	sp|Q9H9B1|EHMT1_HUMAN	STYX	Q4	1	1	0.968	0.986	PCPSNYKYVSQNCVTSPMNIDRNITHLQYCV
sp|Q9ULL5|PRR12_HUMAN_677	K.GLGGSphosGGAGGPPGTPYELAK.E	K.GLGGSphosGGAGGPPGTPYELAK.E	-1.02538	-0.201748	2	2	sp|Q9ULL5|PRR12_HUMAN	STYX	NR	1	1	0.998	0.998	VGEDGAADASKGLGGSGGAGGPPGTPYELAK
sp|Q7L4I2|RSRC2_HUMAN_104 105_C	R.LN(SS)phosENGEDR.H	R.ERLN(SS)phosENGEDR.H	-1.02443	-0.0606828	12	11	sp|Q7L4I2|RSRC2_HUMAN	STYX	NR	0.9994	1	1	1	NDKEHSSDKGRERLNSSENGEDRHKRKERKS DKEHSSDKGRERLNSSENGEDRHKRKERKSS
sp|P50552|VASP_HUMAN_239	R.KVSphosKQEEASGGPTAPK.A	R.KVSphosKQEEASGGPTAPK.A	-1.0238	0.343707	8	5	sp|P50552|VASP_HUMAN	STYX	Q1	1	1	0.999	0.999	PGLAAAIAGAKLRKVSKQEEASGGPTAPKAE
sp|Q9NQ55|SSF1_HUMAN_359	R.VGGSphosDEEASGIPSR.T	R.VGGSphosDEEASGIPSR.T	-1.0238	0.742625	34	55	sp|Q9NQ55|SSF1_HUMAN	STYX	Q1	1	1	0.998	0.998	RKKSLEGMKKARVGGSDEEASGIPSRTASLE
sp|Q86XN7|PRSR1_HUMAN_613	K.TEPTSphosPTPSAFK.G	K.TEPTSphosPTPSAFK.G	-1.02348	-0.194033	2	6	sp|Q86XN7|PRSR1_HUMAN	STYX	NR	0.9998	0.9999	0.943	0.989	PAATTLPVMIKTEPTSPTPSAFKGPSHSGNP
sp|Q13263|TIF1B_HUMAN_697	K.LSphosPANQR.K	K.LSphosPANQR.K	-1.01812	0.533678	4	3	sp|Q13263|TIF1B_HUMAN	STYX	Q1	1	1	1	1	LSLDGADSTGVVAKLSPANQRKCERVLLALF
sp|Q14149|MORC3_HUMAN_560	R.RLSphosSQFENSVYK.G	R.RLSphosSQFENSVYK.G	-1.0153	0.0482515	4	1	sp|Q14149|MORC3_HUMAN	STYX	NR	1	1	0.99	0.962	LSTRSSILNAKNRRLSSQFENSVYKGDDDDE
sp|P27707|DCK_HUMAN_74	Q.STQDEFEELTMSphosQK.N	R.WCNVQSTQDEFEELTMSphosQK.N	-1.0142	1.32694	8	12	sp|P27707|DCK_HUMAN	STYQ	Q1	1	1	0.994	0.994	CNVQSTQDEFEELTMSQKNGGNVLQMMYEKP
sp|Q15311|RBP1_HUMAN_29 30 34_C	R.TP(SS)phosEEISphosPTKFPGLYR.T	R.TP(SS)phosEEISphosPTKFPGLYR.T	-1.0142	-0.645645	2	7	sp|Q15311|RBP1_HUMAN	STYX	Q4	0.989	0.9868	1.305	1.306	EHRRVEHGSGLTRTPSSEEISPTKFPGLYRT HRRVEHGSGLTRTPSSEEISPTKFPGLYRTG EHGSGLTRTPSSEEISPTKFPGLYRTGEPSP
sp|Q709C8|VP13C_HUMAN_736 737_C	K.TTN(SS)phosLEEIMDK.A	K.TTN(SS)phosLEEIMDK.A	-1.0142	-0.0794366	2	2	sp|Q709C8|VP13C_HUMAN	STYX	NR	0.9992	0.999	0.997	0.997	FQLNSKDQGLQKTTNSSLEEIMDKAYDKFDV QLNSKDQGLQKTTNSSLEEIMDKAYDKFDVE
sp|B1AK53|ESPN_HUMAN_515 516_C	K.QP(ST)phosGDYYR.Q	K.QP(ST)phosGDYYR.Q	-1.01342	0.255577	2	5	sp|B1AK53|ESPN_HUMAN	STYX	Q1	0.9997	0.9997	0.999	0.998	RQDSSRKPRAFSKQPSTGDYYRQLGRCPGET QDSSRKPRAFSKQPSTGDYYRQLGRCPGETL
sp|Q86UE4|LYRIC_HUMAN_298	K.LSSQISphosAGEEK.W	K.LSSQISphosAGEEK.W	-1.01295	0.266892	26	23	sp|Q86UE4|LYRIC_HUMAN	STYX	Q1	0.9997	0.9999	0.998	0.997	GGGWNEKSVKLSSQISAGEEKWNSVSPASAG
sp|O75396|SC22B_HUMAN_177	K.ANNLSSLSphosKK.Y	K.ANNLSSLSphosKK.Y	-1.01295	-0.0326684	2	1	sp|O75396|SC22B_HUMAN	STYX	NR	0.998	0.9997	0.925	0.795	ALSALDSKANNLSSLSKKYRQDAKYLNMHST
sp|O75494|SRS10_HUMAN_160	R.SHSphosDNDRFK.H	R.SHSphosDNDRFK.H	-1.01295	0.0350154	10	8	sp|O75494|SRS10_HUMAN	STYX	NR	1	1	0.987	0.992	RNSRPTGRPRRSRSHSDNDRFKHRNRSFSRS
sp|O75385|ULK1_HUMAN_450	R.NLQSphosPTQFQTPR.S	R.NLQSphosPTQFQTPR.S	-1.0128	0.524156	1	8	sp|O75385|ULK1_HUMAN	STYX	Q1	0.9943	0.9999	0.996	0.997	PTQVQNYQRIERNLQSPTQFQTPRSSAIRRS
sp|Q14149|MORC3_HUMAN_517	R.HLSEGTphosNSYATR.L	R.RHLSEGTphosNSYATR.L	-1.0128	0.61562	1	1	sp|Q14149|MORC3_HUMAN	STYX	Q1	0.9996	1	0.568	0.902	SSPKESVPRRHLSEGTNSYATRLLNNHQVPP
sp|Q16630|CPSF6_HUMAN_407	R.TphosPLSEAEFEEIMNR.N	R.EMDTARTphosPLSEAEFEEIMNR.N	-1.0128	0.266892	21	20	sp|Q16630|CPSF6_HUMAN	STYX	Q1	1	1	0.974	0.98	RGDYGPPGREMDTARTPLSEAEFEEIMNRNR
sp|Q8TF47|ZFP90_HUMAN_539	R.RSSphosLTQHER.T	R.RSSphosLTQHER.T	-1.0128	0.552294	1	1	sp|Q8TF47|ZFP90_HUMAN	STYX	Q1	0.9976	0.985	0.948	0.952	PYECNECGEAFSRRSSLTQHERTHTGEKPYE
sp|Q8WYL5|SSH1_HUMAN_581	R.SphosGSLLQVEETEREEGLGAGR.W	R.SphosGSLLQVEETEREEGLGAGR.W	-1.0128	0.396175	5	9	sp|Q8WYL5|SSH1_HUMAN	STYX	Q1	1	1	0.5	0.5	KDVKKKLEFGSPKGRSGSLLQVEETEREEGL
sp|Q9C0H9|SRCN1_HUMAN_396	K.GEGLYphosADPYGLLHEGR.L	K.GEGLYphosADPYGLLHEGR.L	-1.0128	1.22109	2	1	sp|Q9C0H9|SRCN1_HUMAN	STYX	Q1	0.9995	1	0.998	0.998	ASKAGGMVLVKGEGLYADPYGLLHEGRLSLA
sp|Q9NZM4|BICRA_HUMAN_1256	R.HGGAGGSphosPSVTWAR.A	R.HGGAGGSphosPSVTWAR.A	-1.0128	1.22109	3	1	sp|Q9NZM4|BICRA_HUMAN	STYX	Q1	0.9999	0.9987	0.968	0.846	HLPTKLVIRHGGAGGSPSVTWARASSSLSSS
sp|P28290|ITPI2_HUMAN_300	K.TLSphosKLNLCVDK.T	K.TLSphosKLNLCVDKTEK.G	-1.0128	-3.29179	13	4	sp|P28290|ITPI2_HUMAN	STYX	Q4	1	1	0.996	0.993	PLTRSNTANRLMKTLSKLNLCVDKTEKGESS
sp|Q15154|PCM1_HUMAN_803 804 805 806_C	K.YMPAVTSTPTVNQHE(TSTS)phosK.S	K.YMPAVTSTPTVNQHE(TSTS)phosK.S	-1.0128	-0.350051	1	4	sp|Q15154|PCM1_HUMAN	STYX	Q4	0.9992	0.9962	0.776	0.98	YMPAVTSTPTVNQHETSTSKSVFEPEDSSIV MPAVTSTPTVNQHETSTSKSVFEPEDSSIVD PAVTSTPTVNQHETSTSKSVFEPEDSSIVDN AVTSTPTVNQHETSTSKSVFEPEDSSIVDNE
sp|Q9UNL2|SSRG_HUMAN_105	R.KLSphosEADNR.K	R.KLSphosEADNRK.M	-1.0128	-0.393258	23	26	sp|Q9UNL2|SSRG_HUMAN	STYX	Q4	0.9997	1	1	1	QKREDAVSKEVTRKLSEADNRKMSRKEKDER
sp|P52594|AGFG1_HUMAN_293	K.SSSphosADFGTFNTSQSHQTASAVSK.V	K.SSSphosADFGTFNTSQSHQTASAVSK.V	-1.0128	-0.241255	7	1	sp|P52594|AGFG1_HUMAN	STYX	NR	0.9989	0.9927	0.99	0.982	VNANFAHFDNFPKSSSADFGTFNTSQSHQTA
sp|P55265|DSRAD_HUMAN_614	K.TAESQTPTPSATSFFSGKSphosPVTTLLECMHK.L	K.TAESQTPTPSATSFFSGKSphosPVTTLLECMHK.L	-1.0128	-0.22366	3	4	sp|P55265|DSRAD_HUMAN	STYX	NR	0.9444	0.9942	0.965	0.988	SQTPTPSATSFFSGKSPVTTLLECMHKLGNS
sp|Q13595|TRA2A_HUMAN_236	R.RDSphosYYDR.G	R.RRDSphosYYDR.G	-1.0128	0.0217793	4	9	sp|Q13595|TRA2A_HUMAN	STYX	NR	0.9965	0.9996	0.979	0.982	GGGGGGGGGGGRRRDSYYDRGYDRGYDRYED
sp|Q14847|LASP1_HUMAN_146	R.DSphosQDGSSYR.R	R.RDSphosQDGSSYR.R	-1.0128	0.197629	29	21	sp|Q14847|LASP1_HUMAN	STYQ	NR	1	1	0.997	0.997	MGPSGGEGMEPERRDSQDGSSYRRPLEQQQP
sp|Q6PKG0|LARP1_HUMAN_627	R.KNTFTAWSphosDEESDYEIDDRDVNK.L	R.KNTFTAWSphosDEESDYEIDDRDVNK.L	-1.0128	-0.163253	1	5	sp|Q6PKG0|LARP1_HUMAN	STYX	NR	0.9715	0.9951	0.996	0.997	EMEQMDGRKNTFTAWSDEESDYEIDDRDVNK
sp|Q7Z2W4|ZCCHV_HUMAN_386 387_C	R.(SS)phosLGSLQTPEAVTTR.K	R.(SS)phosLGSLQTPEAVTTR.K	-1.0128	0.143291	5	16	sp|Q7Z2W4|ZCCHV_HUMAN	STYX	NR	0.9995	1	0.998	0.998	ARRKTVFSPTLPAARSSLGSLQTPEAVTTRK RRKTVFSPTLPAARSSLGSLQTPEAVTTRKG
sp|Q9NU22|MDN1_HUMAN_3992	R.SSLVESphosDKEEQPDFLPRPTDGAASELSSIQNLNR.A	R.SSLVESphosDKEEQPDFLPRPTDGAASELSSIQNLNR.A	-1.0128	-0.209546	1	1	sp|Q9NU22|MDN1_HUMAN	STYX	NR	0.9273	0.9686	0.985	0.73	FEAVLSEPCRSSLVESDKEEQPDFLPRPTDG
sp|Q9UHI6|DDX20_HUMAN_500	R.NNSphosVSGLSVK.S	R.NNSphosVSGLSVK.S	-1.0128	0.137257	3	9	sp|Q9UHI6|DDX20_HUMAN	STYX	NR	0.9998	0.9999	0.995	0.995	IQKAHGDHMASSRNNSVSGLSVKSKNNTKQK
sp|Q9UPP1|PHF8_HUMAN_1021	R.RPSphosVGSQSNQAGQGK.R	R.RPSphosVGSQSN.Q	-1.0128	-0.0748967	1	1	sp|Q9UPP1|PHF8_HUMAN	STYX	NR	1	0.926	0.986	0.981	TTPMAPGVFLTQRRPSVGSQSNQAGQGKRPK
sp|Q9UQ35|SRRM2_HUMAN_2394	R.VPLSAYERVSphosGR.T	R.VPLSAYERVSphosGR.T	-1.0128	0.0482515	3	2	sp|Q9UQ35|SRRM2_HUMAN	STYX	NR	1	0.9991	0.996	0.984	NLTSPRVPLSAYERVSGRTSPPLLDRARSRT
tr|A0A1B0GV68|A0A1B0GV68_HUMAN_583	R.HSSphosLIDEMFK.G	R.HSSphosLIDEMFK.G	-1.0103	0.0742468	2	3	tr|A0A1B0GV68|A0A1B0GV68_HUMAN	STYX	NR	1	0.9999	0.964	0.987	ITFDMSGSPRLPRHSSLIDEMFKGSAGHSPL
sp|Q9NYV4|CDK12_HUMAN_303	R.SVSphosPYSR.R	R.SVSphosPYSR.R	-1.00689	-0.875127	2	1	sp|Q9NYV4|CDK12_HUMAN	STYX	Q4	0.9983	0.991	0.994	0.993	STRSPSPYSRRQRSVSPYSRRRSSSYERSGS
sp|O43491|E41L2_HUMAN_623	R.VEGDNIYphosVR.H	R.VEGDNIYphosVR.H	-1.00535	0.70152	2	3	sp|O43491|E41L2_HUMAN	STYX	Q1	0.999	0.9999	1	1	IEGKKNSLRVEGDNIYVRHSNLMLEELDKAQ
sp|Q76I76|SSH2_HUMAN_784	K.KNSphosIHELLLER.A	K.KNSphosIHELLLER.A	-1.00226	-0.00518771	6	11	sp|Q76I76|SSH2_HUMAN	STYX	NR	1	1	1	1	KGDILPNPCHTPKKNSIHELLLERAQTPENK
sp|Q96G74|OTUD5_HUMAN_508	R.ATSphosPLVSLYPALECR.A	R.ATSphosPLVSLYPALECR.A	-1.00134	0.533678	6	9	sp|Q96G74|OTUD5_HUMAN	STYX	Q1	1	1	0.991	0.988	PGTSSQFSAGADRATSPLVSLYPALECRALI
sp|Q86V48|LUZP1_HUMAN_932	R.DLKSphosLEDPPTR.L	K.SphosLEDPPTR.L	-0.997209	-0.340791	4	1	sp|Q86V48|LUZP1_HUMAN	STYX	Q4	0.9985	0.9759	0.998	0.989	HVTVRNAWKSRRDLKSLEDPPTRIGKNVEST
sp|Q9H0E9|BRD8_HUMAN_383	R.SGVAEAPVGSphosKAPSIDGKEELDLAEK.M	R.SGVAEAPVGSphosKAPSIDGK.E	-0.99401	-0.290165	2	5	sp|Q9H0E9|BRD8_HUMAN	STYX	Q4	0.9999	1	0.677	0.92	KEECFRSGVAEAPVGSKAPSIDGKEELDLAE
sp|Q9HB19|PKHA2_HUMAN_184	R.SQSphosYIPTSGCR.A	R.SQSphosYIPTSGCR.A	-0.993402	0.456716	2	3	sp|Q9HB19|PKHA2_HUMAN	STYX	Q1	0.9995	0.9998	0.992	0.992	EGSEPGSHTILRRSQSYIPTSGCRASTGPPL
sp|Q69YN2|C19L1_HUMAN_142 143 144_C	R.MMLC(TTS)phosQFK.G	R.MMLC(TTS)phosQFK.G	-0.993099	1.5029	4	2	sp|Q69YN2|C19L1_HUMAN	STYQ	Q1	0.9997	0.9998	1.001	1.001	SFSPKDVSSLRMMLCTTSQFKGVDILLTSPW FSPKDVSSLRMMLCTTSQFKGVDILLTSPWP SPKDVSSLRMMLCTTSQFKGVDILLTSPWPK
sp|Q15796|SMAD2_HUMAN_458	K.VLTQMGSphosPSVR.C	K.VLTQMGSphosPSVR.C	-0.993099	-0.303923	2	2	sp|Q15796|SMAD2_HUMAN	STYX	Q4	0.9993	0.9999	0.992	0.98	NGPLQWLDKVLTQMGSPSVRCSSMS______
sp|P18583|SON_HUMAN_142	K.TKSphosHDDGNIDLESDSFLK.F	K.TKSphosHDDGNIDLESDSFLK.F	-0.993099	0.138152	4	4	sp|P18583|SON_HUMAN	STYX	NR	1	1	0.982	0.979	KKYKRQPEESESKTKSHDDGNIDLESDSFLK
sp|Q9ULJ3|ZBT21_HUMAN_365 366 367_C	K.SSQG(SSS)phosVSSDAPGNVLCALSQK.S	K.SSQG(SSS)phosVSSDAPGNVLCALSQK.S	-0.992492	0.684744	4	3	sp|Q9ULJ3|ZBT21_HUMAN	STYX	Q1	0.9833	0.9791	0.771	0.573	VPVYSPSIDLKSSQGSSSVSSDAPGNVLCAL PVYSPSIDLKSSQGSSSVSSDAPGNVLCALS VYSPSIDLKSSQGSSSVSSDAPGNVLCALSQ
sp|A1L390|PKHG3_HUMAN_433	K.AWSSphosQDEVSTNVR.Q	K.AWSSphosQDEVSTNVR.Q	-0.99234	0.24399	4	4	sp|A1L390|PKHG3_HUMAN	STYQ	NR	0.9998	0.9999	0.993	0.983	NRYRCSPERLKKAWSSQDEVSTNVRQGRRQS
sp|Q93100|KPBB_HUMAN_700 701 702_C	R.Q(SST)phosPSAPELGQQPDVNISEWK.D	R.Q(SST)phosPSAPELGQQPDVNISEWK.D	-0.99234	0.114288	6	6	sp|Q93100|KPBB_HUMAN	STYX	CENTER	0.9999	1	0.989	0.995	FEELEPPKHSKVKRQSSTPSAPELGQQPDVN EELEPPKHSKVKRQSSTPSAPELGQQPDVNI ELEPPKHSKVKRQSSTPSAPELGQQPDVNIS
sp|P24928|RPB1_HUMAN_1842 1843_C	K.YTP(TS)phosPSYSPSSPEYTPTSPK.Y	K.YTP(TS)phosPSYSPSSPEYTPTSPK.Y	-0.991734	0.385833	1	1	sp|P24928|RPB1_HUMAN	STYX	Q1	0.9433	0.9737	0.57	0.598	PSSPSYSPASPKYTPTSPSYSPSSPEYTPTS SSPSYSPASPKYTPTSPSYSPSSPEYTPTSP
sp|P53618|COPB_HUMAN_640	R.QSLSphosHMLSAK.L	R.QSLSphosHMLSAK.L	-0.991734	0.426763	1	1	sp|P53618|COPB_HUMAN	STYX	Q1	0.9925	0.958	0.499	0.875	PLMNDIFNKECRQSLSHMLSAKLEEEKLSQK
sp|Q86UD0|SAPC2_HUMAN_276	R.ASphosADFGAAGSPRPLGR.L	R.ASphosADFGAAGSPRPLGR.L	-0.991734	0.385833	1	7	sp|Q86UD0|SAPC2_HUMAN	STYX	Q1	0.9999	1	0.836	0.998	QRVQERQRRLGQSRASADFGAAGSPRPLGRL
sp|Q86YC2|PALB2_HUMAN_190	K.NPARSphosPVTEIR.T	K.NPARSphosPVTEIR.T	-0.991734	0.758745	7	9	sp|Q86YC2|PALB2_HUMAN	STYX	Q1	0.9995	0.9992	0.997	0.997	RLKEQEEISSKNPARSPVTEIRTHLLSLKSE
sp|Q8NEM7|SP20H_HUMAN_508 509 524_C	R.K(SS)phosVDLNQVSMLSPAALSphosPASSSQR.T	R.K(SS)phosVDLNQVSMLSPAALSphosPASSSQR.T	-0.991734	0.394369	1	2	sp|Q8NEM7|SP20H_HUMAN	STYX	Q1	0.9984	0.9949	1.262	1.234	PTPPPSSKPSSIPRKSSVDLNQVSMLSPAAL TPPPSSKPSSIPRKSSVDLNQVSMLSPAALS SVDLNQVSMLSPAALSPASSSQRTTATQVMA
sp|P08651|NFIC_HUMAN_337	K.TEMDKSPFNSphosPSPQDSPR.L	K.SPFNSphosPSPQDSPR.L	-0.991734	-0.248505	1	2	sp|P08651|NFIC_HUMAN	STYX	Q4	0.9896	0.9993	0.528	0.992	SSPVKKTEMDKSPFNSPSPQDSPRLSSFTQH
sp|P25054|APC_HUMAN_1042	K.YSDEQLNSGRQSphosPSQNER.W	K.YSDEQLNSGRQSphosPSQNER.W	-0.991734	-0.447706	5	1	sp|P25054|APC_HUMAN	STYX	Q4	1	1	0.975	0.951	YSLKYSDEQLNSGRQSPSQNERWARPKHIIE
sp|P46013|KI67_HUMAN_1327	K.LDLTENLTphosGSKR.R	K.LDLTENLTphosGSK.R	-0.991734	-1.24126	1	8	sp|P46013|KI67_HUMAN	STYX	Q4	0.9999	1	0.499	0.991	FVGTPVQKLDLTENLTGSKRRPQTPKEEAQA
sp|Q08170|SRSF4_HUMAN_179	R.LVEDKPGSphosR.R	R.LVEDKPGSphosR.R	-0.991734	-0.33286	5	8	sp|Q08170|SRSF4_HUMAN	STYX	Q4	0.9994	0.9999	1	1	EVNGRKIRLVEDKPGSRRRRSYSRSRSHSRS
sp|Q15772|SPEG_HUMAN_390	R.LSALGRSphosPR.L	R.LSALGRSphosPR.L	-0.991734	-0.41118	5	1	sp|Q15772|SPEG_HUMAN	STYX	Q4	0.9919	0.9666	0.998	0.998	TPLSEASGRLSALGRSPRLVRAGSRILDKLQ
sp|Q9H9Q2|CSN7B_HUMAN_225	K.ATASphosSSAQEMEQQLAER.E	K.ATASphosSSAQEMEQQLAER.E	-0.991734	-0.358069	1	2	sp|Q9H9Q2|CSN7B_HUMAN	STYX	Q4	1	1	0.986	0.956	EAEVTNIKKTLKATASSSAQEMEQQLAEREC
sp|Q9NZJ0|DTL_HUMAN_490	R.GSVSSVSphosPKPPSSFK.M	R.GSVSSVSphosPKPPSSFK.M	-0.991734	-0.603825	1	12	sp|Q9NZJ0|DTL_HUMAN	STYX	Q4	0.9976	1	0.983	0.997	KARSPINRRGSVSSVSPKPPSSFKMSIRNWV
sp|P02545|LMNA_HUMAN_66	R.ITESphosEEVVSR.E	R.ITESphosEEVVSR.E	-0.991734	-0.133195	7	3	sp|P02545|LMNA_HUMAN	STYX	NR	0.9998	0.9999	0.994	0.996	SLETENAGLRLRITESEEVVSREVSGIKAAY
sp|Q5VZL5|ZMYM4_HUMAN_1181	K.SphosIVAVEPR.S	K.SphosIVAVEPR.S	-0.991734	0.221088	15	21	sp|Q5VZL5|ZMYM4_HUMAN	STYX	NR	0.9997	1	1	1	HRDGFPQPRRRGRKKSIVAVEPRSLIQGAFQ
sp|Q7Z589|EMSY_HUMAN_1213	R.ESCSSphosPSTVGSSLTTR.K	R.ESCSSphosPSTVGSSLTTR.K	-0.991734	0.221088	3	1	sp|Q7Z589|EMSY_HUMAN	STYX	NR	0.996	0.9962	0.982	0.952	ANSTPQQQKCRESCSSPSTVGSSLTTRKIDP
tr|A0A2R8YG42|A0A2R8YG42_HUMAN_776	R.KESphosAPQVLLPEEEKIIVEETK.S	R.KESphosAPQVLLPEEEK.L	-0.991734	0.232676	11	27	tr|A0A2R8YG42|A0A2R8YG42_HUMAN	STYX	NR	1	1	1	1	AHSYRMGSTSRSRKESAPQVLLPEEEKIIVE
tr|Q5T760|Q5T760_HUMAN_340	R.SASphosSLHICDSR.E	R.SASphosSLHICDSR.E	-0.991734	0.16714	5	4	tr|Q5T760|Q5T760_HUMAN	STYX	NR	0.9998	1	0.976	0.983	TPPKSYSTARRSRSASSLHICDSRERRRRRS
sp|Q9Y2W1|TR150_HUMAN_928	K.WAHDKFSphosGEEGEIEDDESGTENR.E	K.WAHDKFSphosGEEGEIEDDESGTENREEK.D	-0.991734	-0.089252	9	11	sp|Q9Y2W1|TR150_HUMAN	STYX	CENTER	1	1	0.999	0.999	FRKSSTSPKWAHDKFSGEEGEIEDDESGTEN
sp|Q99590|SCAFB_HUMAN_608	K.TEELIESphosPKLESSEGEIIQTVDR.Q	K.TEELIESphosPKLESSEGEIIQTVDR.Q	-0.985849	-0.0748967	10	16	sp|Q99590|SCAFB_HUMAN	STYX	CENTER	1	1	0.998	0.998	TEHKDFTLKTEELIESPKLESSEGEIIQTVD
sp|Q9NR48|ASH1L_HUMAN_1649	R.KESphosLPSNER.A	R.KESphosLPSNER.A	-0.985849	0.0217793	2	3	sp|Q9NR48|ASH1L_HUMAN	STYX	CENTER	0.9899	0.9994	0.994	0.996	FSAQDTSLNRLHRKESLPSNERAVQTLAGSQ
sp|Q96N46|TTC14_HUMAN_629	R.RNSphosSDSFCR.N	R.RNSphosSDSFCR.N	-0.982251	0.298168	8	2	sp|Q96N46|TTC14_HUMAN	STYX	Q1	1	0.9998	0.986	0.96	EKPYKSERHFSSRRNSSDSFCRNSEDKIYGY
sp|Q99590|SCAFB_HUMAN_472 473 474 475_C	R.VG(SSSS)phosESCAQDLPVLVGEEGEVK.K	R.VG(SSSS)phosESCAQDLPVLVGEEGEVK.K	-0.982251	-0.393258	4	3	sp|Q99590|SCAFB_HUMAN	STYX	Q4	0.9985	0.997	0.997	0.988	SEKHTANYDTEERVGSSSSESCAQDLPVLVG EKHTANYDTEERVGSSSSESCAQDLPVLVGE KHTANYDTEERVGSSSSESCAQDLPVLVGEE HTANYDTEERVGSSSSESCAQDLPVLVGEEG
sp|Q8IWB9|TEX2_HUMAN_270	K.TAPSSPLTSphosPSDTR.S	K.TAPSSPLTSphosPSDTR.S	-0.982102	-0.429327	2	1	sp|Q8IWB9|TEX2_HUMAN	STYX	Q4	0.9953	0.9968	0.982	0.95	NTGGDSKTAPSSPLTSPSDTRSFFKVPEMEA
sp|Q8NFC6|BD1L1_HUMAN_659	R.RTSphosTPVIMEGVQEETDTR.D	R.RTSphosTPVIMEGVQEETDTR.D	-0.981653	0.406443	4	5	sp|Q8NFC6|BD1L1_HUMAN	STYX	Q1	1	1	0.992	0.979	NKNESKLEREHKRRTSTPVIMEGVQEETDTR
sp|Q5UIP0|RIF1_HUMAN_1608	K.ATSphosEEDVSIK.S	K.ATSphosEEDVSIK.S	-0.981653	-0.21168	2	2	sp|Q5UIP0|RIF1_HUMAN	STYX	NR	0.9996	0.9998	0.995	0.992	ECIKAENQSHDYKATSEEDVSIKSPICEKQD
sp|Q00587|BORG5_HUMAN_195	R.SDSLLSphosFR.L	R.RSDSLLSphosFR.L	-0.981355	-0.178519	2	3	sp|Q00587|BORG5_HUMAN	STYX	CENTER	0.9992	0.9997	0.988	0.998	SFPSEPGLRRSDSLLSFRLDLDLGPSLLSEL
sp|Q96N67|DOCK7_HUMAN_2129	K.AVLPVTCHRDSphosFSR.M	K.AVLPVTCHRDSphosFSR.M	-0.981355	0.0870708	10	13	sp|Q96N67|DOCK7_HUMAN	STYX	CENTER	0.9982	0.9995	0.988	0.983	PQLYKAVLPVTCHRDSFSRMSLRKMDL____
sp|Q9H8Y8|GORS2_HUMAN_432 433_C	R.VGD(ST)phosPVSEKPVSAAVDANASESP.-	R.VGD(ST)phosPVSEKPVSAAVDAN.A	-0.979863	0.22329	2	2	sp|Q9H8Y8|GORS2_HUMAN	STYX	NR	0.9999	1	0.936	0.998	PTAKAPTTVEDRVGDSTPVSEKPVSAAVDAN TAKAPTTVEDRVGDSTPVSEKPVSAAVDANA
sp|Q14980|NUMA1_HUMAN_76 77_C	R.KHP(SS)phosPECLVSAQK.V	R.KHP(SS)phosPECLVSAQK.V	-0.975109	-3.41118	2	3	sp|Q14980|NUMA1_HUMAN	STYX	Q4	0.9893	0.9999	0.998	0.999	LDFVCSFLQKNRKHPSSPECLVSAQKVLEGS DFVCSFLQKNRKHPSSPECLVSAQKVLEGSE
sp|Q8NEM7|SP20H_HUMAN_509	R.KSSphosVDLNQVSML.S	R.KSSphosVDLNQVSMLSPAALSPASSSQR.T	-0.972301	0.300315	12	11	sp|Q8NEM7|SP20H_HUMAN	STYX	Q1	1	1	0.995	0.993	TPPPSSKPSSIPRKSSVDLNQVSMLSPAALS
sp|Q12888|TP53B_HUMAN_525	K.LMLSTSEYSQSphosPK.M	K.LMLSTSEYSQSphosPK.M	-0.972301	-0.118473	8	12	sp|Q12888|TP53B_HUMAN	STYX	CENTER	0.9988	1	0.993	0.989	GDSCKLMLSTSEYSQSPKMESLSSHRIDEDG
sp|Q8TDJ6|DMXL2_HUMAN_2399	R.RQSphosENISAPPVLSEDIDKHR.R	R.RQSphosENISAPPVLSEDIDK.H	-0.972301	-0.0606828	2	5	sp|Q8TDJ6|DMXL2_HUMAN	STYX	CENTER	1	1	0.963	0.997	VFGGGVKLVVKPRRQSENISAPPVLSEDIDK
sp|Q08999|RBL2_HUMAN_1112	R.GILLEDGSESphosPAKR.L	R.GILLEDGSESphosPAKR.L	-0.971122	0.226603	8	8	sp|Q08999|RBL2_HUMAN	STYX	CENTER	1	1	0.986	0.973	TPTKKRGILLEDGSESPAKRICPENHSALLR
sp|O60293|ZC3H1_HUMAN_352 353 354_C	R.RI(STS)phosDIL.S	R.RI(STS)phosDILSEK.K	-0.970975	0.914346	13	14	sp|O60293|ZC3H1_HUMAN	STYX	Q1	0.9999	1	1.001	1	SQGLQDKEQNLTRRISTSDILSEKKLGEDEE QGLQDKEQNLTRRISTSDILSEKKLGEDEEE GLQDKEQNLTRRISTSDILSEKKLGEDEEEL
sp|P05114|HMGN1_HUMAN_7	R.KVSphosSAEGAAK.E	R.KVSphosSAEGAAK.E	-0.970975	0.266892	15	7	sp|P05114|HMGN1_HUMAN	STYX	Q1	1	1	0.991	0.95	_________MPKRKVSSAEGAAKEEPKRRSA
sp|P19338|NUCL_HUMAN_619	K.GFGFVDFNSphosEEDAK.A	K.GFGFVDFNSphosEEDAK.A	-0.970975	1.47304	6	2	sp|P19338|NUCL_HUMAN	STYX	Q1	1	1	1	1	RETGSSKGFGFVDFNSEEDAKAAKEAMEDGE
sp|Q15020|SART3_HUMAN_794 795 796 797_C	K.VFR(YSTS)phosLEK.H	K.VFR(YSTS)phosLEK.H	-0.970975	0.495711	11	5	sp|Q15020|SART3_HUMAN	STYX	Q1	0.9989	0.9968	1.001	1.001	PCVDKSKNPDFKVFRYSTSLEKHKLFISGLP CVDKSKNPDFKVFRYSTSLEKHKLFISGLPF VDKSKNPDFKVFRYSTSLEKHKLFISGLPFS DKSKNPDFKVFRYSTSLEKHKLFISGLPFSC
sp|Q86SQ0|PHLB2_HUMAN_563	K.ASSphosESSYLSILPK.T	K.ASSphosESSYLSILPK.T	-0.970975	0.48606	3	1	sp|Q86SQ0|PHLB2_HUMAN	STYX	Q1	0.991	0.994	0.993	0.992	TRTPPPPSSTFPKASSESSYLSILPKTPEGI
sp|Q8N3X1|FNBP4_HUMAN_499	K.IDENSphosDKEMEVEESPEK.L	K.IDENSphosDKEMEVEESPEK.L	-0.970975	0.446801	5	9	sp|Q8N3X1|FNBP4_HUMAN	STYX	Q1	1	1	0.999	0.999	ETAIGAENSEKIDENSDKEMEVEESPEKIKV
sp|Q8NFC6|BD1L1_HUMAN_902	R.TKSphosLLEEK.L	R.TKSphosLLEEK.L	-0.970975	0.806051	1	3	sp|Q8NFC6|BD1L1_HUMAN	STYX	Q1	0.9806	0.9961	0.971	0.99	LKPEEVVHKEKRRTKSLLEEKLVLKSKSKTQ
sp|Q9BWN1|PRR14_HUMAN_363	R.RHTphosVGGGEMAR.A	R.RHTphosVGGGEMAR.A	-0.970975	0.426763	6	7	sp|Q9BWN1|PRR14_HUMAN	STYX	Q1	0.9999	0.9998	1	1	PPAPPQPSRPRPRRHTVGGGEMARAPPPPRP
sp|Q9Y580|RBM7_HUMAN_136	R.SFSphosSPENFQR.Q	R.SFSphosSPENFQR.Q	-0.970975	0.946372	9	11	sp|Q9Y580|RBM7_HUMAN	STYX	Q1	0.9997	0.9999	0.992	0.993	MDNMTSSAQIIQRSFSSPENFQRQAVMNSAL
sp|O43166|SI1L1_HUMAN_1734	K.DSSphosPTLASKVDQLEGMLK.M	K.DSSphosPTLASK.V	-0.970975	-0.553233	1	4	sp|O43166|SI1L1_HUMAN	STYX	Q4	0.9998	0.9997	0.989	0.995	QALAQMKPYSSSKDSSPTLASKVDQLEGMLK
sp|O95292|VAPB_HUMAN_158	K.SLSphosSSLDDTEVK.K	K.SLSphosSSLDDTEVKK.V	-0.970975	-0.667019	11	14	sp|O95292|VAPB_HUMAN	STYX	Q4	1	1	0.995	0.995	TTASKTETPIVSKSLSSSLDDTEVKKVMEEC
sp|P05787|K2C8_HUMAN_34 35 36 37_C	R.I(SSSS)phosFSR.V	R.I(SSSS)phosFSR.V	-0.970975	-0.504289	18	5	sp|P05787|K2C8_HUMAN	STYX	Q4	0.9978	0.9951	0.999	0.998	AFSSRSYTSGPGSRISSSSFSRVGSSNFRGG FSSRSYTSGPGSRISSSSFSRVGSSNFRGGL SSRSYTSGPGSRISSSSFSRVGSSNFRGGLG SRSYTSGPGSRISSSSFSRVGSSNFRGGLGG
sp|P18583|SON_HUMAN_2238	K.RLSphosENAFDLEAM.S	K.RLSphosENAFDLEAMSMLNR.A	-0.970975	-0.41118	3	1	sp|P18583|SON_HUMAN	STYX	Q4	1	0.9999	1	0.99	ISTAMSERALAQKRLSENAFDLEAMSMLNRA
sp|P28290|ITPI2_HUMAN_153	K.GRSphosMNSTGSGK.S	K.GRSphosMNSTGSGK.S	-0.970975	-0.875127	7	1	sp|P28290|ITPI2_HUMAN	STYX	Q4	1	0.9845	0.995	0.99	ILAKERRLQFHQKGRSMNSTGSGKSSGTVSS
sp|P59923|ZN445_HUMAN_927	R.AAQAERSphosPPAR.S	R.AAQAERSphosPPAR.S	-0.970975	-0.426674	5	4	sp|P59923|ZN445_HUMAN	STYX	Q4	0.999	0.9858	1	1	SSHQRKHTRAAQAERSPPARSSSQDTKLRLQ
sp|Q69YQ0|CYTSA_HUMAN_171	K.SKSphosDNQISDR.A	K.SKSphosDNQISDR.A	-0.970975	-0.396012	7	4	sp|Q69YQ0|CYTSA_HUMAN	STYX	Q4	0.9943	0.9998	0.995	0.969	SRTATECDVRMSKSKSDNQISDRAALEAKVK
sp|Q16512|PKN1_HUMAN_106	H.VVLPDPAATphosHDGPQSPGAGGPTCSATNLSR.V	H.VVLPDPAATphosHDGPQSPGAGGPTCSATNLSR.V	-0.970975	-4.73311	5	1	sp|Q16512|PKN1_HUMAN	STYX	NR	0.9992	0.9933	0.923	0.992	LQELHAHVVLPDPAATHDGPQSPGAGGPTCS
sp|O15409|FOXP2_HUMAN_591	K.ITGSphosPTLVK.N	K.ITGSphosPTLVK.N	-0.970975	-0.089252	2	2	sp|O15409|FOXP2_HUMAN	STYX	CENTER	0.9938	0.9997	0.982	0.989	DEVEYQKRRSQKITGSPTLVKNIPTSLGYGA
sp|O43432|IF4G3_HUMAN_1407	K.LDFIESphosDSPCSSEALSKK.E	K.LDFIESphosDSPCSSEALSKK.E	-0.970975	-0.148146	1	1	sp|O43432|IF4G3_HUMAN	STYX	CENTER	0.9952	0.9862	0.499	0.499	DVHNFLLEQKLDFIESDSPCSSEALSKKELS
sp|P18583|SON_HUMAN_908	Q.MLASSTQDSAMLGSphosKSPDPYR.L	L.ASSTQDSAMLGSphosKSPDPYR.L	-0.970975	-0.0326684	5	1	sp|P18583|SON_HUMAN	STYX	CENTER	1	0.9957	0.908	0.504	AQMLASSTQDSAMLGSKSPDPYRLAQDPYRL
sp|P35222|CTNB1_HUMAN_552	R.RTSphosMGGTQQQFVEGVR.M	R.RTSphosMGGTQQQFVEGVR.M	-0.970975	0.0482515	23	29	sp|P35222|CTNB1_HUMAN	STYX	CENTER	1	1	0.996	0.994	VQLLVRAHQDTQRRTSMGGTQQQFVEGVRME
sp|P48382|RFX5_HUMAN_308	R.KKSphosVVESSAPGANNLQVNAL.V	R.KKSphosVVESSAPGANNLQVNAL.V	-0.970975	0.0217793	3	3	sp|P48382|RFX5_HUMAN	STYX	CENTER	0.9941	1	0.992	0.983	ARTGAGPLARGERKKSVVESSAPGANNLQVN
sp|Q12857|NFIA_HUMAN_300 319	R.SphosPGSGSQSSGWHEVEPGMPSphosPTTLK.K	R.SphosPGSGSQSSGWHEVEPGMPSphosPTTLK.K	-0.970975	-0.0327351	5	6	sp|Q12857|NFIA_HUMAN	STYX	CENTER	0.9979	0.9932	0.944	0.886	MDSPGEEPFYTGQGRSPGSGSQSSGWHEVEP GSQSSGWHEVEPGMPSPTTLKKSEKSGFSSP
sp|Q13595|TRA2A_HUMAN_236 237 238_C	R.RRD(SYY)phosDR.G	R.RRD(SYY)phosDR.G	-0.970975	0.0350762	13	7	sp|Q13595|TRA2A_HUMAN	STYX	CENTER	0.9987	0.9996	1.001	1.001	GGGGGGGGGGGRRRDSYYDRGYDRGYDRYED GGGGGGGGGGRRRDSYYDRGYDRGYDRYEDY GGGGGGGGGRRRDSYYDRGYDRGYDRYEDYD
sp|Q14160|SCRIB_HUMAN_1232	R.NSLESISSIDRELSphosPEGPGKEK.E	R.ELSphosPEGPGKEK.E	-0.970975	-0.103752	3	4	sp|Q14160|SCRIB_HUMAN	STYX	CENTER	0.9999	0.997	0.998	1	HRNSLESISSIDRELSPEGPGKEKELPGQTL
sp|Q8IX15|HOMEZ_HUMAN_339	R.HNSphosVPGR.V	R.HNSphosVPGR.V	-0.970975	0.0613077	7	3	sp|Q8IX15|HOMEZ_HUMAN	STYX	CENTER	0.9657	0.9789	1	1	PPHLEPAWPQGLRHNSVPGRVGPTEYLSPDM
sp|Q8N1G0|ZN687_HUMAN_1116 1117 1118 1119 1120_C	R.(SSSST)phosEQSLMMGLR.V	R.(SSSST)phosEQSLMMGLR.V	-0.970975	0.16171	1	3	sp|Q8N1G0|ZN687_HUMAN	STYX	CENTER	0.9891	0.9977	1	1	RGGPGSGGHGPLRYRSSSSTEQSLMMGLRVE GGPGSGGHGPLRYRSSSSTEQSLMMGLRVED GPGSGGHGPLRYRSSSSTEQSLMMGLRVEDG PGSGGHGPLRYRSSSSTEQSLMMGLRVEDGA GSGGHGPLRYRSSSSTEQSLMMGLRVEDGAQ
sp|Q92538|GBF1_HUMAN_321	K.EDLTDLEQPGSPGYSTATphosEPGSSELGVPEQPDLQEGTHVEK.S	K.EDLTDLEQPGSPGYSTATphosEPGSSELGVPEQPDLQEGTHVEK.S	-0.970975	-0.0691915	1	4	sp|Q92538|GBF1_HUMAN	STYX	CENTER	0.9651	0.9859	0.78	0.98	LTDLEQPGSPGYSTATEPGSSELGVPEQPDL
sp|Q9NYB0|TE2IP_HUMAN_154	K.ENARSphosPSSVTGNALWK.A	K.ENARSphosPSSVTGNALWK.A	-0.970975	-0.111075	5	12	sp|Q9NYB0|TE2IP_HUMAN	STYX	CENTER	0.9985	1	0.99	0.99	ADDVAILTYVKENARSPSSVTGNALWKAMEK
sp|Q9NYI0|PSD3_HUMAN_1011 1020	K.SHSphosSPSLNPDTSphosPITAK.V	K.SHSphosSPSLNPDTSphosPITAK.V	-0.970975	0.0997818	1	5	sp|Q9NYI0|PSD3_HUMAN	STYX	CENTER	0.9989	0.9989	0.933	0.945	LSNDESEAAGLKKSHSSPSLNPDTSPITAKV GLKKSHSSPSLNPDTSPITAKVKRNVSERKD
sp|Q9UNX4|WDR3_HUMAN_241	K.IKGSSphosPGIQDTLEAEDGAFETDEAPEDR.L	K.IKGSSphosPGIQDTLEAEDGAFETDEAPEDR.L	-0.970975	0.0613077	3	1	sp|Q9UNX4|WDR3_HUMAN	STYX	CENTER	1	1	0.934	0.901	IEDPEEPDPKKIKGSSPGIQDTLEAEDGAFE
sp|Q99590|SCAFB_HUMAN_963	R.IDRDSYSphosPR.W	R.IDRDSYSphosPR.W	-0.968917	0.198211	2	4	sp|Q99590|SCAFB_HUMAN	STYX	CENTER	0.927	0.9737	0.985	0.991	KSKSSSFGRIDRDSYSPRWKGRWANDGWRCP
sp|Q9HCG8|CWC22_HUMAN_831	R.RNSFSphosENEK.H	R.RNSFSphosENEK.H	-0.968037	-0.0536452	2	4	sp|Q9HCG8|CWC22_HUMAN	STYX	CENTER	0.9992	0.9995	0.587	0.664	HGDPKKKRGERRNSFSENEKHTHRIKDSENF
sp|Q5THK1|PR14L_HUMAN_437	R.CSGEKEPVVSphosPK.E	R.CSGEKEPVVSphosPK.E	-0.962487	-0.00518771	4	9	sp|Q5THK1|PR14L_HUMAN	STYX	CENTER	1	0.9999	0.999	0.998	KEISGRCSGEKEPVVSPKENIHNNCIQDSLH
sp|Q9H0E3|SP130_HUMAN_442	K.VVPQQITHTSphosPR.L	K.VVPQQITHTSphosPR.L	-0.961615	0.117978	2	2	sp|Q9H0E3|SP130_HUMAN	STYX	CENTER	1	1	0.934	0.928	NIPVAKVVPQQITHTSPRIQPDYPAERSSLI
sp|Q5QP82|DCA10_HUMAN_61	R.RPGAPSphosLSPAPR.S	R.RPGAPSphosLSPAPR.S	-0.960743	0.406443	2	3	sp|Q5QP82|DCA10_HUMAN	STYX	Q1	0.9984	0.9906	0.511	0.5	HPPPPARSPRRPGAPSLSPAPRSGELGLPGA
sp|Q7LBC6|KDM3B_HUMAN_798	K.RFSphosLDER.S	K.RFSphosLDER.S	-0.960743	0.610853	6	10	sp|Q7LBC6|KDM3B_HUMAN	STYX	Q1	0.9984	0.9982	1	1	FSQENKAPFEAVKRFSLDERSLACRQDSDSS
sp|P15336|ATF2_HUMAN_131 132_C	R.SKIEEPSVVE(TT)phosHQDSPLPHPESTTSDEK.E	K.IEEPSVVE(TT)phosHQDSPLPHPESTTSDEK.E	-0.960743	0.185755	2	1	sp|P15336|ATF2_HUMAN	STYX	CENTER	0.9995	1	0.932	0.566	TPIIRSKIEEPSVVETTHQDSPLPHPESTTS PIIRSKIEEPSVVETTHQDSPLPHPESTTSD
sp|P23246|SFPQ_HUMAN_273	R.SEEKISphosDSEGFKANLSLLR.R	R.SEEKISphosDSEGFK.A	-0.960743	0.0283052	14	10	sp|P23246|SFPQ_HUMAN	STYX	CENTER	1	0.9997	0.99	0.992	GPPPGGPGGRSEEKISDSEGFKANLSLLRRP
sp|Q6UB98|ANR12_HUMAN_543	K.DDTSLHLFHISTGKSphosPK.H	K.DDTSLHLFHISTGKSphosPK.H	-0.960743	0.143396	12	8	sp|Q6UB98|ANR12_HUMAN	STYX	CENTER	1	1	0.996	0.989	KDDTSLHLFHISTGKSPKHSCGLSEKQSTPL
sp|Q7Z401|MYCPP_HUMAN_731	K.SSSPNSphosPLPMFR.R	K.SSSPNSphosPLPMFR.R	-0.959728	-0.392269	2	4	sp|Q7Z401|MYCPP_HUMAN	STYX	Q4	0.9994	0.9999	0.953	0.995	QAKKNKLPSKSSSPNSPLPMFRRTKQEIKSA
sp|O75362|ZN217_HUMAN_795	K.GKQSphosPPGPGKAPLTSGIDSSTLAPSNLK.S	K.GKQSphosPPGPGK.A	-0.956691	-0.103752	4	13	sp|O75362|ZN217_HUMAN	STYX	CENTER	1	1	0.995	1	FPAQSKSLPSAKGKQSPPGPGKAPLTSGIDS
sp|Q9NYF8|BCLF1_HUMAN_383	R.AEGEWEDQEALDYphosFSDKESGK.Q	K.GRAEGEWEDQEALDYphosFSDKESGK.Q	-0.9518	-0.0748967	8	9	sp|Q9NYF8|BCLF1_HUMAN	STYX	CENTER	1	1	0.831	0.925	KGRAEGEWEDQEALDYFSDKESGKQKFNDSE
sp|O76041|NEBL_HUMAN_953	R.SMQHSphosPNLR.T	R.SMQHSphosPNLR.T	-0.950511	0.736773	3	4	sp|O76041|NEBL_HUMAN	STYX	Q1	0.9891	0.9965	0.944	0.97	YMHQTSVSSMRSMQHSPNLRTYRAMYDYSAQ
sp|P18583|SON_HUMAN_910	A.MLGSKSphosPDPYR.L	T.QDSAMLGSKSphosPDPYR.L	-0.950511	0.689637	19	2	sp|P18583|SON_HUMAN	STYX	Q1	1	0.9587	0.994	0.975	MLASSTQDSAMLGSKSPDPYRLAQDPYRLAQ
sp|P31943|HNRH1_HUMAN_23	R.GLPWSCSphosADEVQR.F	R.GLPWSCSphosADEVQR.F	-0.950511	0.970094	3	2	sp|P31943|HNRH1_HUMAN	STYX	Q1	1	0.9999	0.984	0.995	GEGFVVKVRGLPWSCSADEVQRFFSDCKIQN
sp|P45985|MP2K4_HUMAN_80	R.LRTHSphosIESSGK.L	R.THSphosIESSGK.L	-0.950511	0.359175	3	10	sp|P45985|MP2K4_HUMAN	STYX	Q1	0.998	0.9998	0.995	0.996	PTGVQNPHIERLRTHSIESSGKLKISPEQHW
sp|P62857|RS28_HUMAN_23	R.TGSphosQGQCTQVR.V	R.TGSphosQGQCTQVR.V	-0.950511	1.81764	2	3	sp|P62857|RS28_HUMAN	STYQ	Q1	1	1	0.995	0.995	PIKLARVTKVLGRTGSQGQCTQVRVEFMDDT
sp|Q13813|SPTN1_HUMAN_1323	K.CTELNQAWSSphosLGK.R	K.CTELNQAWSSphosLGK.R	-0.950511	0.481366	5	2	sp|Q13813|SPTN1_HUMAN	STYX	Q1	1	1	0.967	0.92	EDLQEKCTELNQAWSSLGKRADQRKAKLGDS
sp|Q14183|DOC2A_HUMAN_221	R.QVPLASphosPSSMSAALR.G	R.QVPLASphosPSSMSAALR.G	-0.950511	0.538196	3	2	sp|Q14183|DOC2A_HUMAN	STYX	Q1	0.9997	0.9999	0.996	0.99	KKHFNICLERQVPLASPSSMSAALRGISCYL
sp|Q6PJT7|ZC3HE_HUMAN_132	R.VSphosTSSQESK.T	R.VSphosTSSQESK.T	-0.950511	0.624444	1	1	sp|Q6PJT7|ZC3HE_HUMAN	STYX	Q1	0.998	0.9939	0.906	0.989	LAIPSARPEKRDSRVSTSSQESKTTNVRQTY
sp|Q8N1G0|ZN687_HUMAN_1118	R.SSSphosSTEQSLMMGLR.V	R.SSSphosSTEQSLMMGLR.V	-0.950511	0.311286	8	7	sp|Q8N1G0|ZN687_HUMAN	STYX	Q1	0.997	0.9979	0.99	0.988	GPGSGGHGPLRYRSSSSTEQSLMMGLRVEDG
sp|Q96T58|MINT_HUMAN_623 624_C	R.RA(SY)phosDYNQDR.T	R.RA(SY)phosDYNQDR.T	-0.950511	1.04136	3	6	sp|Q96T58|MINT_HUMAN	STYX	Q1	0.9999	1	0.959	0.992	DFYEMLAERREERRASYDYNQDRTYYESVRT FYEMLAERREERRASYDYNQDRTYYESVRTP
sp|Q9BZ67|FRMD8_HUMAN_437 438 439_C	K.R(TTS)phosFFSR.Q	K.R(TTS)phosFFSR.Q	-0.950511	1.30581	3	3	sp|Q9BZ67|FRMD8_HUMAN	STYX	Q1	0.9983	0.9989	0.999	0.992	YVEDGKGIRRVKPKRTTSFFSRQLSLGQGSY VEDGKGIRRVKPKRTTSFFSRQLSLGQGSYT EDGKGIRRVKPKRTTSFFSRQLSLGQGSYTV
sp|Q9H4L7|SMRCD_HUMAN_152	R.NDDISELEDLSphosELEDLKDAK.L	R.RNDDISELEDLSphosELEDLKDAK.L	-0.950511	0.579775	13	9	sp|Q9H4L7|SMRCD_HUMAN	STYX	Q1	1	1	0.999	0.999	TMARRNDDISELEDLSELEDLKDAKLQTLKE
sp|Q9UDT6|CLIP2_HUMAN_352 354 355_C	R.KISphosG(TT)phosALQEALKEK.Q	R.KISphosG(TT)phosALQEALK.E	-0.950511	0.364924	1	1	sp|Q9UDT6|CLIP2_HUMAN	STYX	Q1	0.9998	1	0.539	0.536	SGLLTETSSRYARKISGTTALQEALKEKQQH LLTETSSRYARKISGTTALQEALKEKQQHIE LTETSSRYARKISGTTALQEALKEKQQHIEQ
sp|Q9UDT6|CLIP2_HUMAN_354 355_C	R.KISG(TT)phosALQEALK.E	R.KISG(TT)phosALQEALK.E	-0.950511	0.436817	5	11	sp|Q9UDT6|CLIP2_HUMAN	STYX	Q1	1	1	0.972	0.956	LLTETSSRYARKISGTTALQEALKEKQQHIE LTETSSRYARKISGTTALQEALKEKQQHIEQ
sp|Q9Y4E5|ZN451_HUMAN_853	K.QAINYSKSphosLDMEK.G	K.QAINYSKSphosLDMEK.G	-0.950511	0.718103	1	1	sp|Q9Y4E5|ZN451_HUMAN	STYX	Q1	0.9994	0.9864	0.869	0.885	SHTERKLKQAINYSKSLDMEKGVENDLSYQN
sp|Q9Y6X4|F169A_HUMAN_489	K.LQPFNSSEDSTNLVPLVVESSKPPEVDAPDKTphosPR.L	K.LQPFNSSEDSTNLVPLVVESSKPPEVDAPDKTphosPR.L	-0.950511	0.82146	3	6	sp|Q9Y6X4|F169A_HUMAN	STYX	Q1	1	1	0.807	0.998	VVESSKPPEVDAPDKTPRIPDSEMLMDEGTS
sp|O15014|ZN609_HUMAN_1102	K.VKLSphosDASHLSK.E	K.VKLSphosDASHLSK.E	-0.950511	-1.38245	1	2	sp|O15014|ZN609_HUMAN	STYX	Q4	0.9738	0.9989	0.995	0.995	SKLPGQAPEGLKVKLSDASHLSKEASEAKTG
sp|Q09666|AHNK_HUMAN_5530	K.GGLKGSphosEVGFHGAAPDISVK.G	K.GGLKGSphosEVGFHGAAPDISVK.G	-0.950511	-0.420254	1	2	sp|Q09666|AHNK_HUMAN	STYX	Q4	1	1	0.986	0.998	TGQISGPEIKGGLKGSEVGFHGAAPDISVKG
sp|Q7KZF4|SND1_HUMAN_645	K.SLLSphosAEEAAK.Q	K.SLLSphosAEEAAK.Q	-0.950511	-0.340791	7	3	sp|Q7KZF4|SND1_HUMAN	STYX	Q4	0.9995	0.9997	0.996	0.994	VHFTAERSSYYKSLLSAEEAAKQKKEKVWAH
sp|Q8WWI1|LMO7_HUMAN_988	K.EVAATEEDVTRLPSphosPTSPFSSLSQDQAATSK.A	K.EVAATEEDVTRLPSphosPTSPFSSLSQDQAATSK.A	-0.950511	-1.59041	1	2	sp|Q8WWI1|LMO7_HUMAN	STYX	Q4	0.9948	0.9975	0.983	0.995	QKEVAATEEDVTRLPSPTSPFSSLSQDQAAT
sp|Q99567|NUP88_HUMAN_442	K.FLGSDEEDKDSLQELSphosTEQK.C	K.FLGSDEEDKDSLQELSphosTEQK.C	-0.950511	-0.384624	3	4	sp|Q99567|NUP88_HUMAN	STYX	Q4	0.9999	1	0.978	0.989	FLGSDEEDKDSLQELSTEQKCFVEHILCTKP
tr|A0A1B0GWE0|A0A1B0GWE0_HUMAN_521	R.GQLERSphosPSGSAFGSQENLR.W	R.GQLERSphosPSGSAFGSQENLR.W	-0.950511	-0.323717	3	1	tr|A0A1B0GWE0|A0A1B0GWE0_HUMAN	STYX	Q4	0.9999	0.9972	0.981	0.995	ARQEMVRRSRGQLERSPSGSAFGSQENLRWR
sp|A6NDB9|PALM3_HUMAN_420	R.KAEESMGIGSEEKPGTGRDEAEMSphosPVVER.K	R.DEAEMSphosPVVER.K	-0.950511	0.300315	1	1	sp|A6NDB9|PALM3_HUMAN	STYX	CENTER	0.9999	1	0.557	1	GSEEKPGTGRDEAEMSPVVERKGGEKKLELE
sp|O14715|RGPD8_HUMAN_979	K.STSphosGEGFQFGK.K	K.STSphosGEGFQFGK.K	-0.950511	-0.148146	7	5	sp|O14715|RGPD8_HUMAN	STYX	CENTER	0.9999	0.9999	0.992	0.992	QTSSTFTFADVAKSTSGEGFQFGKKDLNFKG
sp|O95785|WIZ_HUMAN_1129	R.SPSphosDLHISPLAK.K	R.SPSphosDLHISPLAK.K	-0.950511	-0.0748967	1	1	sp|O95785|WIZ_HUMAN	STYX	CENTER	0.9999	1	0.502	0.499	MGGAGPGSSLEARSPSDLHISPLAKKLPPPP
sp|O95785|WIZ_HUMAN_1480	R.DSDKRPSphosLGLAPGGLAVVGR.S	R.DSDKRPSphosLGLAPGGLAVVGR.S	-0.950511	-0.00518771	5	6	sp|O95785|WIZ_HUMAN	STYX	CENTER	0.9998	1	0.993	0.992	KFRSAGHGRDSDKRPSLGLAPGGLAVVGRSA
sp|P17535|JUND_HUMAN_115 116 117_C	N.GLV(TTT)phosPTSSQFLYPK.V	R.LIIQSNGLV(TTT)phosPTSSQFLYPK.V	-0.950511	0.112382	4	3	sp|P17535|JUND_HUMAN	STYX	CENTER	0.9923	0.9985	0.999	0.996	SPELERLIIQSNGLVTTTPTSSQFLYPKVAA PELERLIIQSNGLVTTTPTSSQFLYPKVAAS ELERLIIQSNGLVTTTPTSSQFLYPKVAASE
sp|P51610|HCFC1_HUMAN_666	K.TITLVKSphosPISVPGGSAL.L	K.SphosPISVPGGSALISNLGK.V	-0.950511	0.0870708	28	32	sp|P51610|HCFC1_HUMAN	STYX	CENTER	1	1	0.998	0.998	TTVVGGVTKTITLVKSPISVPGGSALISNLG
sp|P57682|KLF3_HUMAN_101	R.ASPGLSMPSSSphosPPIKK.Y	R.ASPGLSMPSSSphosPPIK.K	-0.950511	-0.147676	1	2	sp|P57682|KLF3_HUMAN	STYX	CENTER	0.9971	0.9999	0.935	0.929	SSHRRASPGLSMPSSSPPIKKYSPPSPGVQP
sp|Q09666|AHNK_HUMAN_1445	K.FKMPEMSphosIK.A	K.MPEMSphosIKPQKISIPDVGLHLK.G	-0.950511	0.0497404	1	2	sp|Q09666|AHNK_HUMAN	STYX	CENTER	0.9937	0.9998	1	0.598	PDAKLKGPKFKMPEMSIKPQKISIPDVGLHL
sp|Q6UXH1|CREL2_HUMAN_70 71_C	K.TLSKYE(SS)phosEIR.L	K.TLSKYE(SS)phosEIR.L	-0.950511	0.0870708	3	3	sp|Q6UXH1|CREL2_HUMAN	STYX	CENTER	1	0.9996	0.824	0.903	GGNTAWEEKTLSKYESSEIRLLEILEGLCES GNTAWEEKTLSKYESSEIRLLEILEGLCESS
sp|Q86X29|LSR_HUMAN_646	K.NLALSRESphosLVV.-	K.NLALSRESphosLVV.-	-0.950511	-0.268479	6	2	sp|Q86X29|LSR_HUMAN	STYX	CENTER	0.9971	0.9961	0.978	0.97	SRERRLKKNLALSRESLVV____________
sp|Q8NFC6|BD1L1_HUMAN_1316 1317 1318_C	R.TVLEGSTA(STS)phosPADHSALPNQSLTVR.E	R.TVLEGSTA(STS)phosPADHSALPNQSLTVR.E	-0.950511	0.137257	1	3	sp|Q8NFC6|BD1L1_HUMAN	STYX	CENTER	0.9966	0.9977	0.992	0.995	IPLFDKRTVLEGSTASTSPADHSALPNQSLT PLFDKRTVLEGSTASTSPADHSALPNQSLTV LFDKRTVLEGSTASTSPADHSALPNQSLTVR
sp|Q8NFC6|BD1L1_HUMAN_658 659 660_C	R.R(TST)phosPVIMEGVQEETDTR.D	R.R(TST)phosPVIMEGVQEETDTR.D	-0.950511	0.244172	7	13	sp|Q8NFC6|BD1L1_HUMAN	STYX	CENTER	1	1	1	1.001	ENKNESKLEREHKRRTSTPVIMEGVQEETDT NKNESKLEREHKRRTSTPVIMEGVQEETDTR KNESKLEREHKRRTSTPVIMEGVQEETDTRD
sp|Q8NFZ8|CADM4_HUMAN_361	K.GSYLTHEASphosGLDEQGEAR.E	K.GSYLTHEASphosGLDEQGEAR.E	-0.950511	0.00779155	3	8	sp|Q8NFZ8|CADM4_HUMAN	STYX	CENTER	1	1	0.972	0.985	WCSVRQKGSYLTHEASGLDEQGEAREAFLNG
sp|Q96JQ2|CLMN_HUMAN_419	R.SNSphosLPIKK.T	R.SNSphosLPIKK.T	-0.950511	0.0870708	7	11	sp|Q96JQ2|CLMN_HUMAN	STYX	CENTER	0.9965	0.9993	0.996	0.996	ESSILSSRKENGRSNSLPIKKTVHFEADTYK
sp|Q9HD20|AT131_HUMAN_899	R.RPRDSphosPTLSNSGIR.A	R.DSphosPTLSNSGIR.A	-0.950511	-0.241255	1	7	sp|Q9HD20|AT131_HUMAN	STYX	CENTER	0.958	0.9998	0.817	0.996	NAPERVVERRRRPRDSPTLSNSGIRATSRTA
sp|Q9NWQ8|PHAG1_HUMAN_227	K.AEFAEYphosASVDR.N	K.AEFAEYphosASVDR.N	-0.950511	0.232676	1	1	sp|Q9NWQ8|PHAG1_HUMAN	STYX	CENTER	1	0.9982	0.986	0.987	ELPGPQTEGKAEFAEYASVDRNKKCRQSVNV
sp|Q9NZN5|ARHGC_HUMAN_1537	R.LAGSALTphosDKHSDKS.-	R.LAGSALTphosDKHSDKS.-	-0.950511	-0.118398	1	7	sp|Q9NZN5|ARHGC_HUMAN	STYX	CENTER	0.995	0.9999	0.707	0.984	ESYTILCQRLAGSALTDKHSDKS________
sp|Q9UKX7|NUP50_HUMAN_296	F.SFSphosPGNSSLFGK.D	F.SFSphosPGNSSLFGK.D	-0.950511	-0.290165	6	1	sp|Q9UKX7|NUP50_HUMAN	STYX	CENTER	1	0.9888	0.994	0.995	VLGSLSSVPLTGFSFSPGNSSLFGKDTTQSK
sp|Q9UPN9|TRI33_HUMAN_862	K.QSGLSSLVNGKSphosPIR.S	K.QSGLSSLVNGKSphosPIR.S	-0.950511	-0.178519	18	27	sp|Q9UPN9|TRI33_HUMAN	STYX	CENTER	1	1	0.998	0.998	ESCKQSGLSSLVNGKSPIRSLMHRSARIGGD
tr|E9PJ10|E9PJ10_HUMAN_57	R.SphosWASPVYTEADGTFSR.S	R.SphosWASPVYTEADGTFSR.S	-0.950511	0.00835882	5	2	tr|E9PJ10|E9PJ10_HUMAN	STYX	CENTER	1	1	0.998	0.995	PLRKKKPDKHEDNRRSWASPVYTEADGTFSR
sp|Q8N8S7|ENAH_HUMAN_265 266_C	R.RI(SS)phosAAAPASVETPLNSVLGDSSASEPGLQAA.S	R.RI(SS)phosAAAPASVETPLNSVLGDSSASEPGLQAA.S	-0.948368	0.00835882	16	7	sp|Q8N8S7|ENAH_HUMAN	STYX	CENTER	1	0.9981	1	1	QLEREQLEWERERRISSAAAPASVETPLNSV LEREQLEWERERRISSAAAPASVETPLNSVL
sp|P05783|K1C18_HUMAN_30	R.SLGSVQAPSYGARPVSphosSAASVYAGAGGSGSR.L	R.SLGSVQAPSYGARPVSphosSAASVYAGAGGSGSR.L	-0.943817	0.633188	2	4	sp|P05783|K1C18_HUMAN	STYX	Q1	0.9974	0.9981	0.983	0.956	SLGSVQAPSYGARPVSSAASVYAGAGGSGSR
sp|Q5VZK9|CARL1_HUMAN_1068	R.KSSphosGFLNLIK.S	K.SSphosGFLNLIK.S	-0.942118	0.441602	4	8	sp|Q5VZK9|CARL1_HUMAN	STYX	Q1	0.9999	1	0.964	0.987	NEGGDEKKKRDSRKSSGFLNLIKSRSKSERP
sp|P49736|MCM2_HUMAN_108	R.AIPELDAYEAEGLALDDEDVEELTASphosQR.E	L.ALDDEDVEELTASphosQR.E	-0.940422	1.66225	36	12	sp|P49736|MCM2_HUMAN	STYQ	Q1	1	1	0.99	0.981	EGLALDDEDVEELTASQREAAERAMRQRDRE
sp|Q5W0B1|OBI1_HUMAN_553	K.ISELDSMMSESDNSKSphosPCNNGFK.S	K.ISELDSMMSESDNSKSphosPCNNGFK.S	-0.940422	0.486028	2	4	sp|Q5W0B1|OBI1_HUMAN	STYX	Q1	0.994	0.9946	0.963	0.967	ISELDSMMSESDNSKSPCNNGFKSLDLDGLS
sp|Q6KC79|NIPBL_HUMAN_274	R.NAASFPLRSphosPQPVCSPAGSEGTPK.G	R.NAASFPLRSphosPQPVCSPAGSEGTPK.G	-0.939294	-0.178519	2	6	sp|Q6KC79|NIPBL_HUMAN	STYX	CENTER	0.9923	1	0.976	0.993	GDSSTMRNAASFPLRSPQPVCSPAGSEGTPK
sp|Q9H9E3|COG4_HUMAN_6	-.MADLDSphosPPKLSGVQQPSEGVGGGR.C	-.MADLDSphosPPK.L	-0.937465	-0.0466076	2	7	sp|Q9H9E3|COG4_HUMAN	STYX	CENTER	1	1	0.995	1	__________MADLDSPPKLSGVQQPSEGVG
sp|Q12830|BPTF_HUMAN_1615 1616 1617_C	K.SHLL(SSS)phosDAEGNYR.D	K.SHLL(SSS)phosDAEGNYR.D	-0.93536	0.197629	2	5	sp|Q12830|BPTF_HUMAN	STYX	CENTER	0.9998	0.9999	0.999	1	DFNERNSSETKSHLLSSSDAEGNYRDSLETL FNERNSSETKSHLLSSSDAEGNYRDSLETLP NERNSSETKSHLLSSSDAEGNYRDSLETLPS
sp|Q8N567|ZCHC9_HUMAN_28	K.KGSphosFEGTSQNLPK.R	K.KGSphosFEGTSQNLPK.R	-0.93494	1.80191	2	2	sp|Q8N567|ZCHC9_HUMAN	STYX	Q1	0.9997	0.9999	0.995	0.981	KRPLPATSWEDMKKGSFEGTSQNLPKRKQLE
sp|P09884|DPOLA_HUMAN_406	K.ETGTphosPISMK.D	K.ETGTphosPISMK.D	-0.930472	1.30031	4	1	sp|P09884|DPOLA_HUMAN	STYX	Q1	0.995	0.9993	0.994	0.782	PREMKIDLNTGKETGTPISMKDVYEEFDEKI
sp|P08727|K1C19_HUMAN_12 13 14_C	R.QSSA(TSS)phosFGGLGGGSVR.F	R.QSSA(TSS)phosFGGLGGGSVR.F	-0.930472	-0.624584	16	5	sp|P08727|K1C19_HUMAN	STYX	Q4	0.9984	0.9956	0.997	0.999	____MTSYSYRQSSATSSFGGLGGGSVRFGP ___MTSYSYRQSSATSSFGGLGGGSVRFGPG __MTSYSYRQSSATSSFGGLGGGSVRFGPGV
sp|P08727|K1C19_HUMAN_14	R.QSSATSSphosFGGLGGGSVR.F	R.QSSATSSphosFGGLGGGSVR.F	-0.930472	-0.733108	2	1	sp|P08727|K1C19_HUMAN	STYX	Q4	0.9967	0.9973	0.978	0.962	__MTSYSYRQSSATSSFGGLGGGSVRFGPGV
sp|P16435|NCPR_HUMAN_61 62 63_C	K.IQTL(TSS)phosVR.E	K.IQTL(TSS)phosVR.E	-0.930472	-1.0445	4	2	sp|P16435|NCPR_HUMAN	STYX	Q4	0.9997	0.9997	0.999	0.996	KKKEEVPEFTKIQTLTSSVRESSFVEKMKKT KKEEVPEFTKIQTLTSSVRESSFVEKMKKTG KEEVPEFTKIQTLTSSVRESSFVEKMKKTGR
sp|P04083|ANXA1_HUMAN_37	K.GGPGSAVSphosPYPTFNPSSDVAALHK.A	K.GGPGSAVSphosPYPTFNPSSDVAALHK.A	-0.930472	0.28926	2	10	sp|P04083|ANXA1_HUMAN	STYX	CENTER	0.9847	1	0.987	0.995	VQTVKSSKGGPGSAVSPYPTFNPSSDVAALH
sp|P55196|AFAD_HUMAN_1238	R.EYFTFPASKSphosQDR.M	R.EYFTFPASKSphosQDR.M	-0.930472	-0.358069	2	1	sp|P55196|AFAD_HUMAN	STYQ	CENTER	0.9997	0.9998	0.894	0.808	TQTYTREYFTFPASKSQDRMAPPQNQWPNYE
sp|Q14789|GOGB1_HUMAN_539	R.SSSphosAEESGQDVLENTFSQK.H	R.SSSphosAEESGQDVLENTFSQK.H	-0.930472	0.0350762	14	10	sp|Q14789|GOGB1_HUMAN	STYX	CENTER	1	1	0.991	0.989	VSEISIVDIANKRSSSAEESGQDVLENTFSQ
sp|Q71RC2|LARP4_HUMAN_673	R.ASphosKDYSGFR.G	R.ASphosKDYSGFR.G	-0.930472	-0.0257655	4	10	sp|Q71RC2|LARP4_HUMAN	STYX	CENTER	0.9894	0.9972	0.996	0.996	ENSVEKPHEKPEARASKDYSGFRGNIIPRGA
sp|Q7Z3J3|RGPD4_HUMAN_810	R.WAEDQNSphosLLK.M	R.WAEDQNSphosLLK.M	-0.930472	0.0217793	4	1	sp|Q7Z3J3|RGPD4_HUMAN	STYX	CENTER	0.9991	0.9934	1	1	KYSPKTPPRWAEDQNSLLKMIRQEVKAIKEE
sp|O75717|WDHD1_HUMAN_374	R.QRSphosHILEDDENSVDISMLK.T	R.QRSphosHILEDDENSVDISMLK.T	-0.930333	0.385833	3	2	sp|O75717|WDHD1_HUMAN	STYX	Q1	1	1	0.999	0.999	DDEDLMMASGRPRQRSHILEDDENSVDISML
sp|P05783|K1C18_HUMAN_30 31_C	R.PV(SS)phosAASVYAGAGGSGSR.L	R.SLGSVQAPSYGARPV(SS)phosAASVYAGAGGSGSR.L	-0.930333	2.34904	7	1	sp|P05783|K1C18_HUMAN	STYX	Q1	1	0.987	0.969	0.907	SLGSVQAPSYGARPVSSAASVYAGAGGSGSR LGSVQAPSYGARPVSSAASVYAGAGGSGSRI
sp|Q68DK2|ZFY26_HUMAN_1762	R.SphosPSAEFSPAAPPGISSIHSPSLR.E	R.SphosPSAEFSPAAPPGISSIHSPSLR.E	-0.930333	0.667771	1	3	sp|Q68DK2|ZFY26_HUMAN	STYX	Q1	0.9999	1	0.512	0.626	QEIVHQAADPETLPRSPSAEFSPAAPPGISS
sp|Q8N5W9|RFLB_HUMAN_6	M.VGRLSphosLQDVPELVDAK.K	M.VGRLSphosLQDVPELVDAK.K	-0.930333	0.650596	7	9	sp|Q8N5W9|RFLB_HUMAN	STYX	Q1	1	1	1	1	__________MVGRLSLQDVPELVDAKKKGD
sp|Q9NY27|PP4R2_HUMAN_159	R.MNGVMFPGNSphosPSYTER.S	R.MNGVMFPGNSphosPSYTER.S	-0.930333	0.61562	20	19	sp|Q9NY27|PP4R2_HUMAN	STYX	Q1	1	1	0.994	0.995	SNSLNRMNGVMFPGNSPSYTERSNINGPGTP
sp|P05787|K2C8_HUMAN_13	K.SYKVSphosTSGPR.A	K.SYKVSphosTSGPR.A	-0.930333	-0.801789	5	4	sp|P05787|K2C8_HUMAN	STYX	Q4	0.9978	0.9995	0.976	0.986	___MSIRVTQKSYKVSTSGPRAFSSRSYTSG
sp|P21333|FLNA_HUMAN_1081	K.AFGPGLQGGSphosAGSPAR.F	K.AFGPGLQGGSphosAGSPAR.F	-0.930333	-3.56318	1	1	sp|P21333|FLNA_HUMAN	STYX	Q4	0.9834	0.9998	0.987	0.566	KPSKVKAFGPGLQGGSAGSPARFTIDTKGAG
sp|P43243|MATR3_HUMAN_206	R.GPSLNPVLDYDHGSphosRSQESGYYDR.M	R.GPSLNPVLDYDHGSphosR.S	-0.930333	-1.17852	5	11	sp|P43243|MATR3_HUMAN	STYX	Q4	0.9996	1	0.986	0.969	DRGPSLNPVLDYDHGSRSQESGYYDRMDYED
sp|Q6WCQ1|MPRIP_HUMAN_977	K.AATEALGEKSphosPDSATVSGYDIMK.S	K.AATEALGEKSphosPDSATVSGYDIMK.S	-0.930333	-0.523655	5	7	sp|Q6WCQ1|MPRIP_HUMAN	STYX	Q4	0.9939	0.9976	0.997	0.997	LKEQLKAATEALGEKSPDSATVSGYDIMKSK
sp|Q8IY17|PLPL6_HUMAN_464	R.ISVSLQEEASGGSLAAPARTphosPTQEPR.E	R.ISVSLQEEASGGSLAAPARTphosPTQEPR.E	-0.930333	-0.688714	1	1	sp|Q8IY17|PLPL6_HUMAN	STYX	Q4	0.9702	1	0.926	0.974	LQEEASGGSLAAPARTPTQEPREQPAGACEY
sp|Q8NFH5|NUP35_HUMAN_151	R.KTTLSphosPAQLDPFYTQ.G	R.KTTLSphosPAQLDPFYTQ.G	-0.930333	-1.30684	5	1	sp|Q8NFH5|NUP35_HUMAN	STYX	Q4	1	0.9738	0.99	0.983	MFSPASIGQPRKTTLSPAQLDPFYTQGDSLT
sp|P46937|YAP1_HUMAN_289	R.ISQSAPVKQPPPLAPQSphosPQGGVM.G	K.QPPPLAPQSphosPQGGVMGGSNSNQQQQMR.L	-0.930333	-6.5956	9	1	sp|P46937|YAP1_HUMAN	STYX	NR	1	1	0.999	0.997	SQSAPVKQPPPLAPQSPQGGVMGGSNSNQQQ
sp|P24928|RPB1_HUMAN_1867 1868_C	K.YSPTSPK(YS)phosPTSPK.Y	K.YSPTSPK(YS)phosPTSPK.Y	-0.930333	0.226882	1	4	sp|P24928|RPB1_HUMAN	STYX	CENTER	0.9639	0.9612	0.972	0.994	EYTPTSPKYSPTSPKYSPTSPKYSPTSPTYS YTPTSPKYSPTSPKYSPTSPKYSPTSPTYSP
sp|P39880|CUX1_HUMAN_1454 1455_C	R.RP(SS)phosLQSLFGLPEAAGAR.D	R.RP(SS)phosLQSLFGLPEAAGAR.D	-0.930333	0.173782	12	9	sp|P39880|CUX1_HUMAN	STYX	CENTER	1	1	1	0.998	PPPSNSSSSSAPRRPSSLQSLFGLPEAAGAR PPSNSSSSSAPRRPSSLQSLFGLPEAAGARD
sp|P52272|HNRPM_HUMAN_528	R.MGLSphosMER.M	R.MGLSphosMER.M	-0.930333	-0.0748967	62	21	sp|P52272|HNRPM_HUMAN	STYX	CENTER	0.9996	0.9997	1	1	SGVERMGPAIERMGLSMERMVPAGMGAGLER
sp|Q13615|MTMR3_HUMAN_1184	K.SCYSSLHPTSSSphosIDLELDKPIAATSN.-	K.SCYSSLHPTSSSphosIDLELDKPIAATSN.-	-0.930333	-0.0188626	1	1	sp|Q13615|MTMR3_HUMAN	STYX	CENTER	0.9856	0.9959	0.956	0.949	RVCKSCYSSLHPTSSSIDLELDKPIAATSN_
sp|Q2M2I8|AAK1_HUMAN_637	R.ILSphosDVTHSAVFGVPASK.S	R.ILSphosDVTHSAVFGVPASK.S	-0.930333	-0.0748967	7	18	sp|Q2M2I8|AAK1_HUMAN	STYX	CENTER	1	1	0.996	0.998	PSSPKTQRAGHRRILSDVTHSAVFGVPASKS
sp|Q7L4I2|RSRC2_HUMAN_4	M.AASphosDTER.D	M.AASphosDTER.D	-0.930333	0.239248	3	6	sp|Q7L4I2|RSRC2_HUMAN	STYX	CENTER	0.9745	0.9991	0.987	0.992	____________MAASDTERDGLAPEKTSPD
sp|Q7Z3K3|POGZ_HUMAN_746	R.KMSphosVMGR.Q	R.KMSphosVMGR.Q	-0.930333	-0.0677898	7	6	sp|Q7Z3K3|POGZ_HUMAN	STYX	CENTER	0.9987	0.9996	1	1	PPVQRSIQKRAVRKMSVMGRQTCLECSFEIP
sp|Q86V48|LUZP1_HUMAN_573 574 575_C	R.R(SSS)phosEGLSK.G	R.(SSS)phosEGLSK.G	-0.930333	-0.133195	3	5	sp|Q86V48|LUZP1_HUMAN	STYX	CENTER	0.9977	0.9989	0.998	1	SGCSKAIGALASSRRSSSEGLSKGKKAANGL GCSKAIGALASSRRSSSEGLSKGKKAANGLE CSKAIGALASSRRSSSEGLSKGKKAANGLEA
sp|Q8IWI9|MGAP_HUMAN_1208	K.LLTGIKSphosPR.S	K.LLTGIKSphosPR.S	-0.930333	0.0997818	11	5	sp|Q8IWI9|MGAP_HUMAN	STYX	CENTER	0.9974	0.9981	0.998	0.998	VLSPTVKGKLLTGIKSPRSYTPKPNPVIREE
sp|Q9H0U9|TSYL1_HUMAN_26	R.TTPLQTHSIIISDQVPSphosDQDAHQYLR.L	R.TTPLQTHSIIISDQVPSphosDQDAHQYLR.L	-0.930333	0.173782	2	1	sp|Q9H0U9|TSYL1_HUMAN	STYX	CENTER	0.9998	0.9999	0.788	0.988	TPLQTHSIIISDQVPSDQDAHQYLRLRDQSE
sp|Q9Y2W1|TR150_HUMAN_444	K.GRKESphosEFDDEPK.F	R.KESphosEFDDEPK.F	-0.930333	0.232676	4	10	sp|Q9Y2W1|TR150_HUMAN	STYX	CENTER	0.9996	1	1	1	EMDDQDKDKAKGRKESEFDDEPKFMSKVIGA
tr|I3L2J0|I3L2J0_HUMAN_472	R.ARTphosPLTAAQQK.Y	R.ARTphosPLTAAQQK.Y	-0.930333	0.0742468	11	9	tr|I3L2J0|I3L2J0_HUMAN	STYX	CENTER	1	0.9999	0.998	0.998	VASLEKGTAPAARARTPLTAAQQKYKKGDVV
sp|Q5TDH0|DDI2_HUMAN_126 127 128_C	R.QPPGTQQSHSSPGEI(TSS)phosPQGLDNPALLR.D	R.QPPGTQQSHSSPGEI(TSS)phosPQGLDNPALLR.D	-0.927001	0.185755	2	7	sp|Q5TDH0|DDI2_HUMAN	STYX	CENTER	0.9942	0.9956	0.999	0.998	QPPGTQQSHSSPGEITSSPQGLDNPALLRDM PPGTQQSHSSPGEITSSPQGLDNPALLRDML PGTQQSHSSPGEITSSPQGLDNPALLRDMLL
sp|P02545|LMNA_HUMAN_423 424_C	R.KLE(ST)phosESR.S	R.KLE(ST)phosESR.S	-0.926171	-0.233284	6	10	sp|P02545|LMNA_HUMAN	STYX	CENTER	0.9978	0.9989	0.997	0.998	QTQGGGSVTKKRKLESTESRSSFSQHARTSG TQGGGSVTKKRKLESTESRSSFSQHARTSGR
sp|P16144|ITB4_HUMAN_1498	R.SphosEHSHSTTLPR.D	R.SphosEHSHSTTLPR.D	-0.924513	-0.0749674	2	2	sp|P16144|ITB4_HUMAN	STYX	CENTER	0.999	1	0.713	0.996	STSSTLTRDYNSLTRSEHSHSTTLPRDYSTL
sp|Q8TF47|ZFP90_HUMAN_538 539_C	R.R(SS)phosLTQHER.T	R.R(SS)phosLTQHER.T	-0.923134	0.311286	2	2	sp|Q8TF47|ZFP90_HUMAN	STYX	CENTER	0.9995	0.9988	0.873	0.893	KPYECNECGEAFSRRSSLTQHERTHTGEKPY PYECNECGEAFSRRSSLTQHERTHTGEKPYE
tr|Q5T760|Q5T760_HUMAN_340 341_C	R.SA(SS)phosLHICDSR.E	R.SA(SS)phosLHICDSR.E	-0.922032	0.149535	2	9	tr|Q5T760|Q5T760_HUMAN	STYX	CENTER	0.9999	1	0.866	0.998	TPPKSYSTARRSRSASSLHICDSRERRRRRS PPKSYSTARRSRSASSLHICDSRERRRRRSR
sp|Q9P1Y5|CAMP3_HUMAN_544	K.APVYMPHPETPSKPSPCLVGEASKPPAPSphosEGSPK.A	C.LVGEASKPPAPSphosEGSPK.A	-0.921757	0.0422652	2	4	sp|Q9P1Y5|CAMP3_HUMAN	STYX	CENTER	1	0.9977	0.923	0.95	PSPCLVGEASKPPAPSEGSPKAVASSPAATN
sp|Q13547|HDAC1_HUMAN_409	R.ISICSphosSDKR.L	R.ISICSphosSDKR.L	-0.920383	0.0328871	6	2	sp|Q13547|HDAC1_HUMAN	STYX	CENTER	0.9994	0.9997	0.985	0.922	GDEDEDDPDKRISICSSDKRIACEEEFSDSE
sp|Q9H0E3|SP130_HUMAN_441 442_C	K.VVPQQITH(TS)phosPR.L	K.VVPQQITH(TS)phosPR.L	-0.920383	0.0613077	8	21	sp|Q9H0E3|SP130_HUMAN	STYX	CENTER	0.9998	1	0.996	0.998	SNIPVAKVVPQQITHTSPRIQPDYPAERSSL NIPVAKVVPQQITHTSPRIQPDYPAERSSLI
sp|Q8IWW6|RHG12_HUMAN_104	R.STphosENVNKLPELSSFGKPSSSVQGT.G	R.STphosENVNKLPELSSFGKPSSSVQGTGLIR.D	-0.91546	-0.133195	2	1	sp|Q8IWW6|RHG12_HUMAN	STYX	CENTER	0.9865	1	0.927	0.945	NNSTKIMQSLHLQRSTENVNKLPELSSFGKP
sp|Q96P16|RPR1A_HUMAN_152 153_C	K.VDENENC(SS)phosLGSPSEPPQTLDLVR.A	K.VDENENC(SS)phosLGSPSEPPQTLDLVR.A	-0.91546	0.332981	2	13	sp|Q96P16|RPR1A_HUMAN	STYX	CENTER	0.9968	1	0.66	0.917	KRTYEQIKVDENENCSSLGSPSEPPQTLDLV RTYEQIKVDENENCSSLGSPSEPPQTLDLVR
sp|P49759|CLK1_HUMAN_337 338_C	K.VVDFGSATYDDEHH(ST)phosLVSTR.H	K.VVDFGSATYDDEHH(ST)phosLVSTR.H	-0.911653	-0.193949	8	9	sp|P49759|CLK1_HUMAN	STYX	CENTER	1	1	0.895	0.974	KVVDFGSATYDDEHHSTLVSTRHYRAPEVIL VVDFGSATYDDEHHSTLVSTRHYRAPEVILA
sp|O60583|CCNT2_HUMAN_601	R.SphosPVGLSSDGISSSSSSSR.K	R.SphosPVGLSSDGISSSSSSSR.K	-0.910975	0.426763	14	9	sp|O60583|CCNT2_HUMAN	STYX	Q1	1	1	0.998	0.998	GSKHSADGIPPTVLRSPVGLSSDGISSSSSS
sp|Q15042|RB3GP_HUMAN_537	K.KTSphosASDVTNIYPGDAGK.A	K.KTSphosASDVTNIYPGDAGK.A	-0.910569	0.343351	4	10	sp|Q15042|RB3GP_HUMAN	STYX	CENTER	0.9992	0.9995	0.986	0.984	CCIERKKARDEGKKTSASDVTNIYPGDAGKA
sp|Q5SW79|CE170_HUMAN_667	K.VVTQRSphosEIGEK.Q	K.VVTQRSphosEIGEK.Q	-0.910569	-0.103752	2	9	sp|Q5SW79|CE170_HUMAN	STYX	CENTER	1	1	0.989	0.996	EKSLESHRAKVVTQRSEIGEKQDTELQEKET
sp|P53618|COPB_HUMAN_644	R.QSLSHMLSphosAK.L	R.QSLSHMLSphosAK.L	-0.910434	0.69379	1	2	sp|P53618|COPB_HUMAN	STYX	Q1	0.9971	0.9919	0.872	0.974	DIFNKECRQSLSHMLSAKLEEEKLSQKKESE
sp|Q13472|TOP3A_HUMAN_971	R.ASSphosSDMGSTAK.K	R.ASSphosSDMGSTAK.K	-0.910434	0.43137	3	4	sp|Q13472|TOP3A_HUMAN	STYX	Q1	0.9982	0.9999	0.98	0.989	RTLESEARSKRPRASSSDMGSTAKKPRKCSL
sp|Q7KZ85|SPT6H_HUMAN_1532	R.TRTphosPASINATPANINLADLTR.A	R.TRTphosPASINATPANINLADLTR.A	-0.910434	0.844321	6	14	sp|Q7KZ85|SPT6H_HUMAN	STYX	Q1	1	1	0.988	0.982	DPVPGITPSSSSRTRTPASINATPANINLAD
sp|Q8IY18|SMC5_HUMAN_35	R.KNSphosAPQLPLLQ.S	R.KNSphosAPQLPLLQSSGPFVEGSIVR.L	-0.910434	0.561513	13	31	sp|Q8IY18|SMC5_HUMAN	STYX	Q1	1	1	1	1	LPRDPSSEVPSKRKNSAPQLPLLQSSGPFVE
sp|Q9HCE3|ZN532_HUMAN_1140	K.EMTDATNEEETEIKEDTKVPSphosPK.R	K.EMTDATNEEETEIKEDTKVPSphosPK.R	-0.910434	0.551345	1	4	sp|Q9HCE3|ZN532_HUMAN	STYX	Q1	0.9999	1	0.994	0.996	TNEEETEIKEDTKVPSPKRKLEEPVLEFRPP
sp|P55196|AFAD_HUMAN_1799	R.LFSphosQGQDVSNK.V	R.LFSphosQGQDVSNK.V	-0.910434	-0.802371	5	6	sp|P55196|AFAD_HUMAN	STYQ	Q4	0.9995	0.9999	0.998	0.998	GAPENLTFKERQRLFSQGQDVSNKVKASRKL
sp|Q6IQ19|CCSAP_HUMAN_240	R.AHSphosVDVEK.N	R.AHSphosVDVEK.N	-0.910434	-0.675424	1	2	sp|Q6IQ19|CCSAP_HUMAN	STYX	Q4	0.9903	0.9998	1	1	QVEKRKLVAQRQRAHSVDVEKNRKMKASSSE
sp|Q9BRD0|BUD13_HUMAN_163	R.HDTPDPSphosPLR.G	R.HDTPDPSphosPLR.G	-0.910434	-0.951748	3	7	sp|Q9BRD0|BUD13_HUMAN	STYX	Q4	1	0.9999	0.988	0.998	PDPSPRRARHDTPDPSPLRGARHDSDTSPPR
sp|O15085|ARHGB_HUMAN_1461 1462_C	K.SLGGESSGG(TT)phosPVGSFHTEAAR.W	K.SLGGESSGG(TT)phosPVGSFHTEAAR.W	-0.910434	-0.133195	1	3	sp|O15085|ARHGB_HUMAN	STYX	CENTER	0.9976	0.9974	0.98	0.994	HRELLKSLGGESSGGTTPVGSFHTEAARWTD RELLKSLGGESSGGTTPVGSFHTEAARWTDG
sp|O43719|HTSF1_HUMAN_387	R.SDSphosVSASER.A	R.RSDSphosVSASER.A	-0.910434	0.137257	31	29	sp|O43719|HTSF1_HUMAN	STYX	CENTER	0.9996	0.9999	0.995	0.994	FLNAPEANRGLRRSDSVSASERAGPSRARHF
sp|O75128|COBL_HUMAN_962 963_C	R.KL(ST)phosQDRPAAIHR.S	R.KL(ST)phosQDRPAAIHR.S	-0.910434	-0.0466076	1	3	sp|O75128|COBL_HUMAN	STYQ	CENTER	1	1	1	1	GAPPRGEVIGPHRKLSTQDRPAAIHRSSCFS APPRGEVIGPHRKLSTQDRPAAIHRSSCFSL
sp|O95471|CLD7_HUMAN_206 207_C	K.SN(SS)phosKEYV.-	K.SN(SS)phosKEYV.-	-0.910434	-0.0404466	5	4	sp|O95471|CLD7_HUMAN	STYX	CENTER	0.9764	0.9979	0.994	0.994	SKAGYRVPRSYPKSNSSKEYV__________ KAGYRVPRSYPKSNSSKEYV___________
sp|P15822|ZEP1_HUMAN_479	K.LGLVLQPDAGGLFLSHESphosPK.A	K.LGLVLQPDAGGLFLSHESphosPK.A	-0.910434	0.266892	3	1	sp|P15822|ZEP1_HUMAN	STYX	CENTER	1	1	0.989	0.972	LVLQPDAGGLFLSHESPKALSIHSDVEDSGE
sp|P28715|ERCC5_HUMAN_523	R.ELTphosPASPTCTNSVSK.N	R.ELTphosPASPTCTNSVSK.N	-0.910434	0.209406	1	1	sp|P28715|ERCC5_HUMAN	STYX	CENTER	0.9993	0.9999	0.497	0.478	VRHSDAPGLPNGRELTPASPTCTNSVSKNET
sp|P35222|CTNB1_HUMAN_556	R.TSMGGTphosQQQFVEGVR.M	R.TSMGGTphosQQQFVEGVR.M	-0.910434	0.0217793	3	1	sp|P35222|CTNB1_HUMAN	STYQ	CENTER	0.9999	0.9994	0.912	0.874	VRAHQDTQRRTSMGGTQQQFVEGVRMEEIVE
sp|P98175|RBM10_HUMAN_531	Y.TIMSphosPAVLK.S	Y.TIMSphosPAVLK.S	-0.910434	0.0350762	14	5	sp|P98175|RBM10_HUMAN	STYX	CENTER	0.993	1	0.998	0.997	SSQGTAANSQSYTIMSPAVLKSELQSPTHPS
sp|Q13098|CSN1_HUMAN_479	R.EGSQGELTphosPANSQSR.M	R.EGSQGELTphosPANSQSR.M	-0.910434	0.28926	6	16	sp|Q13098|CSN1_HUMAN	STYX	CENTER	1	1	0.997	0.997	IHVKSPPREGSQGELTPANSQSRMSTNM___
sp|Q15459|SF3A1_HUMAN_451	R.EKQSphosDDEVYAPGLDIESSLK.Q	R.EKQSphosDDEVYAPGLDIESSLK.Q	-0.910434	-0.0748967	17	7	sp|Q15459|SF3A1_HUMAN	STYX	CENTER	1	1	0.999	0.998	PRWLEQRDRSIREKQSDDEVYAPGLDIESSL
sp|Q5VTQ0|TT39B_HUMAN_120	R.GASphosTVSSSSSTK.V	R.GASphosTVSSSSSTK.V	-0.910434	0.196853	2	2	sp|Q5VTQ0|TT39B_HUMAN	STYX	CENTER	0.9974	0.9999	0.995	0.988	FASCDTQQAPRQRGASTVSSSSSTKVDLKSG
sp|Q5VZL5|ZMYM4_HUMAN_595	K.TSAIPQYHLAMSphosDGSIR.N	K.TSAIPQYHLAMSphosDGSIR.N	-0.910434	0.16171	1	1	sp|Q5VZL5|ZMYM4_HUMAN	STYX	CENTER	0.9767	0.9895	0.543	0.934	NSCKTSAIPQYHLAMSDGSIRNFCSYSCVVA
sp|Q96IQ9|ZN414_HUMAN_265	Y.LNPAPFGLSphosPPR.L	Y.LNPAPFGLSphosPPR.L	-0.910434	-0.257375	3	3	sp|Q96IQ9|ZN414_HUMAN	STYX	CENTER	0.9918	0.9875	1	1	TGPFLPYLNPAPFGLSPPRLRPFLAAAPGPP
sp|Q99959|PKP2_HUMAN_197	R.SphosEIVGVSR.A	R.SphosEIVGVSR.A	-0.910434	0.185755	3	5	sp|Q99959|PKP2_HUMAN	STYX	CENTER	0.9989	0.9993	0.998	0.997	ESRRAALLVPPRYARSEIVGVSRAGTTSRQR
sp|Q99959|PKP2_HUMAN_293 294_C	R.SSWHQ(SS)phosFHSTR.T	R.SSWHQ(SS)phosFHSTR.T	-0.910434	0.137257	5	1	sp|Q99959|PKP2_HUMAN	STYX	CENTER	0.9991	0.9991	0.998	0.998	QPVTQNRASRSSWHQSSFHSTRTLREAGPSV PVTQNRASRSSWHQSSFHSTRTLREAGPSVA
sp|Q9BY89|K1671_HUMAN_549	K.EGHSphosLDGACIPR.S	K.EGHSphosLDGACIPR.S	-0.910434	0.173782	8	3	sp|Q9BY89|K1671_HUMAN	STYX	CENTER	0.9997	0.9999	1	1	GEFPKEPREKQKEGHSLDGACIPRSPWKPGT
sp|Q9C0A6|SETD5_HUMAN_591	R.RSSphosQAGDIAAEK.L	R.RSSphosQAGDIAAEK.L	-0.910434	-0.0326684	9	6	sp|Q9C0A6|SETD5_HUMAN	STYQ	CENTER	1	1	0.966	0.984	IPSTPQSVGVNTRRSSQAGDIAAEKLVPKPP
sp|Q9HC62|SENP2_HUMAN_344	R.KVSphosIIETK.E	R.KVSphosIIETK.E	-0.910434	-0.306843	4	9	sp|Q9HC62|SENP2_HUMAN	STYX	CENTER	0.9993	0.9997	0.996	0.997	LRLGSGSNGLLRRKVSIIETKEKNCSGKERD
sp|P55196|AFAD_HUMAN_1230	R.EYphosFTFPASK.S	R.EYphosFTFPASK.S	-0.910298	-0.447706	2	1	sp|P55196|AFAD_HUMAN	STYX	Q4	0.9869	0.9995	0.996	0.997	RPEAYPIPTQTYTREYFTFPASKSQDRMAPP
sp|Q9C0B0|UNK_HUMAN_378	R.NSSLGSphosPSNLCGSPPGSIR.K	R.NSSLGSphosPSNLCGSPPGSIR.K	-0.908946	-0.0966475	2	2	sp|Q9C0B0|UNK_HUMAN	STYX	CENTER	0.9928	0.9876	0.336	0.799	APDLSALLCRNSSLGSPSNLCGSPPGSIRKP
sp|Q6WKZ4|RFIP1_HUMAN_358	K.HLFSSTphosENLAAGSWKEPAEGGGLSSDR.Q	K.HLFSSTphosENLAAGSWKEPAEGGGLSSDR.Q	-0.906519	-0.0749674	4	2	sp|Q6WKZ4|RFIP1_HUMAN	STYX	CENTER	1	1	0.961	0.98	SPSPKGFRKKHLFSSTENLAAGSWKEPAEGG
sp|P16220|CREB1_HUMAN_340	K.DLYCHKSphosD.-	K.DLYCHKSphosD.-	-0.90625	0.0350762	2	1	sp|P16220|CREB1_HUMAN	STYX	CENTER	0.9831	0.9972	0.995	0.995	LIEELKALKDLYCHKSD______________
sp|Q9Y5A6|ZSC21_HUMAN_135 136_C	R.ELDEPGHQV(ST)phosPPNEQKPVWEK.L	R.ELDEPGHQV(ST)phosPPNEQKPVWEK.L	-0.905174	0.790454	4	7	sp|Q9Y5A6|ZSC21_HUMAN	STYX	Q1	0.9998	1	1	1	LEDLERELDEPGHQVSTPPNEQKPVWEKISS EDLERELDEPGHQVSTPPNEQKPVWEKISSS
sp|Q9Y2W2|WBP11_HUMAN_600	K.GATAAPQRKSphosEDDSAVPLAK.A	K.SphosEDDSAVPLAK.A	-0.904636	0.836747	2	4	sp|Q9Y2W2|WBP11_HUMAN	STYX	Q1	0.9997	1	0.992	0.996	VRRENKGATAAPQRKSEDDSAVPLAKAAPKS
sp|P27694|RFA1_HUMAN_34 35_C	K.GDTNIKPILQVINIRPI(TT)phosGNSPPR.Y	K.GDTNIKPILQVINIRPI(TT)phosGNSPPR.Y	-0.902223	0.278119	2	7	sp|P27694|RFA1_HUMAN	STYX	CENTER	1	1	0.568	0.99	TNIKPILQVINIRPITTGNSPPRYRLLMSDG NIKPILQVINIRPITTGNSPPRYRLLMSDGL
sp|Q9UQ35|SRRM2_HUMAN_2688	R.KPIDSLRDSphosR.S	R.KPIDSLRDSphosR.S	-0.901421	-0.359012	8	6	sp|Q9UQ35|SRRM2_HUMAN	STYX	CENTER	1	0.9994	0.96	0.921	RRSRSPRKPIDSLRDSRSLSYSPVERRRPSP
sp|Q12888|TP53B_HUMAN_1672 1673_C	K.LI(TS)phosEEER.S	K.LI(TS)phosEEERSPAKR.G	-0.900886	-0.900218	10	15	sp|Q12888|TP53B_HUMAN	STYX	Q4	0.9992	0.9999	1	1	PRASMGVLSGKRKLITSEEERSPAKRGRKSA RASMGVLSGKRKLITSEEERSPAKRGRKSAT
sp|Q8NFA0|UBP32_HUMAN_1421 1422 1423_C	K.L(SSS)phosKENLDASKENGAGQICELADALSR.G	K.L(SSS)phosKENLDASK.E	-0.900886	0.419709	6	20	sp|Q8NFA0|UBP32_HUMAN	STYX	CENTER	1	1	1	1.001	KGRLRLPQIGSKNKLSSSKENLDASKENGAG GRLRLPQIGSKNKLSSSKENLDASKENGAGQ RLRLPQIGSKNKLSSSKENLDASKENGAGQI
sp|Q9UHB6|LIMA1_HUMAN_617	K.GWSphosMSEQSEESVGGR.V	K.GWSphosMSEQSEESVGGR.V	-0.900886	0.118195	12	8	sp|Q9UHB6|LIMA1_HUMAN	STYX	CENTER	1	1	0.997	0.996	VKSPKTVSPPIRKGWSMSEQSEESVGGRVAE
sp|A8K0R7|ZN839_HUMAN_316	R.ACSphosETLAESR.T	R.ACSphosETLAESR.T	-0.900619	0.48606	4	2	sp|A8K0R7|ZN839_HUMAN	STYX	Q1	0.9997	0.9999	0.996	0.992	LLRSERYQGPRRRACSETLAESRTAVLQQRR
sp|Q8NG31|KNL1_HUMAN_60	R.RVSphosFADTIK.V	R.RVSphosFADTIK.V	-0.900619	0.597809	4	3	sp|Q8NG31|KNL1_HUMAN	STYX	Q1	0.9993	0.9999	0.988	0.978	QESNALRNKKNSRRVSFADTIKVFQTESHMK
sp|Q9BYW2|SETD2_HUMAN_437 438_C	R.YHR(SS)phosPYR.E	R.YHR(SS)phosPYR.E	-0.900619	0.693157	2	3	sp|Q9BYW2|SETD2_HUMAN	STYX	Q1	0.9985	0.9952	0.584	0.891	SERSHYYDSDRRYHRSSPYRERTRYSRPYTD ERSHYYDSDRRYHRSSPYRERTRYSRPYTDN
sp|P21127|CD11B_HUMAN_448	R.IEEGTphosYGVVYR.A	R.IEEGTphosYGVVYR.A	-0.900619	-0.103825	8	2	sp|P21127|CD11B_HUMAN	STYX	CENTER	0.9997	0.9999	0.992	0.978	RSVEEFQCLNRIEEGTYGVVYRAKDKKTDEI
sp|Q13425|SNTB2_HUMAN_393	R.SphosPSLGSDLTFATR.T	R.SphosPSLGSDLTFATR.T	-0.900619	-0.133195	12	15	sp|Q13425|SNTB2_HUMAN	STYX	CENTER	1	0.9999	0.995	0.985	PLVATRLVHSGSGCRSPSLGSDLTFATRTGS
sp|Q68CP9|ARID2_HUMAN_1302 1303_C	R.KYSD(SS)phosLPPSNSGK.L	R.KYSD(SS)phosLPPSNSGK.L	-0.900085	-0.0895406	2	6	sp|Q68CP9|ARID2_HUMAN	STYX	CENTER	0.9978	0.9995	0.952	0.944	EMHVGSLLNGRKYSDSSLPPSNSGKIQSETN MHVGSLLNGRKYSDSSLPPSNSGKIQSETNQ
sp|O75533|SF3B1_HUMAN_278	R.GDTPGHATphosPGHGGATSSAR.K	R.GDTPGHATphosPGHGGATSSAR.K	-0.894106	0.31112	4	2	sp|O75533|SF3B1_HUMAN	STYX	CENTER	0.993	0.9968	0.992	0.991	AGAATPGRGDTPGHATPGHGGATSSARKNRW
sp|Q9NVA2|SEP11_HUMAN_17	R.NLSphosLSGHVGFDSLPDQLVNK.S	R.NLSphosLSGHVGFDSLPDQLVNK.S	-0.894106	-0.111075	2	4	sp|Q9NVA2|SEP11_HUMAN	STYX	CENTER	1	1	0.916	0.975	AVAVGRPSNEELRNLSLSGHVGFDSLPDQLV
sp|P05787|K2C8_HUMAN_451	Y.SLGSSFGSGAGSSSphosFSR.T	F.GSGAGSSSphosFSR.T	-0.892916	-0.900218	4	1	sp|P05787|K2C8_HUMAN	STYX	Q4	0.9726	0.9854	0.957	0.958	SYSLGSSFGSGAGSSSFSRTSSSRAVVVKKI
sp|Q14573|ITPR3_HUMAN_1832	R.VASphosFSIPGSSSR.Y	R.VASphosFSIPGSSSR.Y	-0.891332	0.137257	8	15	sp|Q14573|ITPR3_HUMAN	STYX	CENTER	0.9998	1	0.997	0.998	EDREPVDPTTKGRVASFSIPGSSSRYSLGPS
sp|Q9P2D0|IBTK_HUMAN_990	R.KRSphosDSSGGYNLSDIIQSPSSTGLLK.S	R.KRSphosDSSGGYNLSDIIQSPSSTGLLK.S	-0.891332	-0.393258	6	6	sp|Q9P2D0|IBTK_HUMAN	STYX	CENTER	0.9904	0.9973	0.991	0.994	FKKAKTKAKKKPRKRSDSSGGYNLSDIIQSP
sp|Q641Q2|WAC2A_HUMAN_32	R.RSSphosQSWSL.A	R.RSSphosQSWSL.A	-0.890937	0.0613077	2	1	sp|Q641Q2|WAC2A_HUMAN	STYQ	CENTER	0.9805	0.9366	0.983	0.978	PVWERPWSVEEIRRSSQSWSLAADAGLLQFL
sp|O75182|SIN3B_HUMAN_29	R.SphosGSAGHEKLPVHVEDALTYLDQVK.L	R.SphosGSAGHEKLPVHVEDALTYLDQVK.L	-0.890805	0.925103	2	1	sp|O75182|SIN3B_HUMAN	STYX	Q1	0.9997	0.9924	0.84	0.497	GGPAGRGLSGARWGRSGSAGHEKLPVHVEDA
sp|P81408|F189B_HUMAN_493	R.SHSphosDPGITTSSDTADFR.D	R.SHSphosDPGITTSSDTADFR.D	-0.890805	0.758745	1	3	sp|P81408|F189B_HUMAN	STYX	Q1	1	1	0.986	0.996	PHPASPPPLLLPRSHSDPGITTSSDTADFRD
sp|Q15345|LRC41_HUMAN_326 327_C	R.(ST)phosQESLTAGGTDLKR.E	R.(ST)phosQESLTAGGTDLKR.E	-0.890805	0.888944	3	8	sp|Q15345|LRC41_HUMAN	STYQ	Q1	1	1	0.962	0.998	KQMPRAAPATRVTRRSTQESLTAGGTDLKRE QMPRAAPATRVTRRSTQESLTAGGTDLKREL
sp|Q71F56|MD13L_HUMAN_747	K.NKSphosEDGFGTK.D	K.NKSphosEDGFGTK.D	-0.890805	1.62004	3	5	sp|Q71F56|MD13L_HUMAN	STYX	Q1	0.9761	0.9984	0.997	0.997	KCKQGTEKDSLKKNKSEDGFGTKDVTTPGHS
sp|Q9C0A6|SETD5_HUMAN_590 591_C	R.R(SS)phosQAGDIAAEK.L	R.(SS)phosQAGDIAAEK.L	-0.890805	0.798273	1	1	sp|Q9C0A6|SETD5_HUMAN	STYQ	Q1	0.9999	0.9995	1	1	TIPSTPQSVGVNTRRSSQAGDIAAEKLVPKP IPSTPQSVGVNTRRSSQAGDIAAEKLVPKPP
sp|Q9H0U9|TSYL1_HUMAN_142	R.SASphosELTAGAEAEAEEVK.T	R.SASphosELTAGAEAEAEEVK.T	-0.890805	1.60674	1	1	sp|Q9H0U9|TSYL1_HUMAN	STYX	Q1	0.9944	1	0.961	0.989	GGEKALEICGAQRSASELTAGAEAEAEEVKT
sp|Q9Y2Z0|SGT1_HUMAN_279 280 281_C	K.NLYP(SSS)phosPYTR.N	K.NLYP(SSS)phosPYTR.N	-0.890805	0.610279	1	2	sp|Q9Y2Z0|SGT1_HUMAN	STYX	Q1	0.9862	0.9991	0.996	0.968	PTPKQFVADVKNLYPSSSPYTRNWDKLVGEI TPKQFVADVKNLYPSSSPYTRNWDKLVGEIK PKQFVADVKNLYPSSSPYTRNWDKLVGEIKE
sp|O75427|LRCH4_HUMAN_313	K.RWSphosGNESTDEFSELSFR.L	K.RWSphosGNESTDEFSELSFR.L	-0.890805	-1.73311	1	1	sp|O75427|LRCH4_HUMAN	STYX	Q4	0.9995	1	0.843	0.994	LDSGFHSVDSGSKRWSGNESTDEFSELSFRI
sp|P42166|LAP2A_HUMAN_154	K.LREQGTphosESR.S	K.LREQGTphosESR.S	-0.890805	-0.839565	7	2	sp|P42166|LAP2A_HUMAN	STYX	Q4	0.9966	0.993	0.989	0.988	RKLYEKKLLKLREQGTESRSSTPLPTISSSA
sp|Q9BXK5|B2L13_HUMAN_420	R.EESphosLVEELSPASEK.K	R.EESphosLVEELSPASEK.K	-0.890805	-1.06068	1	1	sp|Q9BXK5|B2L13_HUMAN	STYX	Q4	0.9856	0.9995	0.858	0.991	TETLLSEKEINAREESLVEELSPASEKKPVP
sp|O15194|CTDSL_HUMAN_33	K.ASQCNVSphosLK.K	K.ASQCNVSphosLK.K	-0.890805	-0.212963	6	2	sp|O15194|CTDSL_HUMAN	STYX	CENTER	0.9983	0.9939	0.998	0.995	GRLPGAGEKASQCNVSLKKQRSRSILSSFFC
sp|O60716|CTND1_HUMAN_899	K.SphosLDNNYSTPNER.G	K.SphosLDNNYSTPNER.G	-0.890805	-0.133195	3	1	sp|O60716|CTND1_HUMAN	STYX	CENTER	0.9998	0.9999	0.998	0.996	DREEIQMSNMGSNTKSLDNNYSTPNERGDHN
sp|O94808|GFPT2_HUMAN_244 245_C	K.RLD(SS)phosACLHAVGDK.A	K.RLD(SS)phosACLHAVGDK.A	-0.890805	0.375416	3	12	sp|O94808|GFPT2_HUMAN	STYX	CENTER	1	1	1	1	ENVKNICKTRMKRLDSSACLHAVGDKAVEFF NVKNICKTRMKRLDSSACLHAVGDKAVEFFF
sp|P07947|YES_HUMAN_111	R.TTEDLSphosFK.K	R.TTEDLSphosFK.K	-0.890805	-0.396012	1	2	sp|P07947|YES_HUMAN	STYX	CENTER	0.9816	0.9984	0.995	0.993	FVALYDYEARTTEDLSFKKGERFQIINNTEG
sp|P55081|MFAP1_HUMAN_94	R.LQNRISphosEDVEER.L	R.ISphosEDVEER.L	-0.890805	-0.0257655	9	12	sp|P55081|MFAP1_HUMAN	STYX	CENTER	0.9993	0.9999	1	1	DSSSDPRLRRLQNRISEDVEERLARHRKIVE
sp|P98175|RBM10_HUMAN_797	R.AHLSphosENELEALEK.N	R.AHLSphosENELEALEK.N	-0.890805	0.31673	17	16	sp|P98175|RBM10_HUMAN	STYX	CENTER	1	1	1	1	GLHKQNLEIHRRAHLSENELEALEKNDMEQM
sp|Q05209|PTN12_HUMAN_571 587 588_C	K.TVSLTPSphosPTTQVETPDLVDHDN(TS)phosPLFR.T	K.TVSLTPSphosPTTQVETPDLVDHDN(TS)phosPLFR.T	-0.890805	-0.148146	1	6	sp|Q05209|PTN12_HUMAN	STYX	CENTER	0.9985	0.9996	1.226	1.202	SDINYQTRKTVSLTPSPTTQVETPDLVDHDN PTTQVETPDLVDHDNTSPLFRTPLSFTNPLH TTQVETPDLVDHDNTSPLFRTPLSFTNPLHS
sp|Q13523|PRP4B_HUMAN_87	K.EIIDASphosDKEGMSPAKR.T	K.EIIDASphosDKEGMSPAK.R	-0.890805	-0.0606828	1	11	sp|Q13523|PRP4B_HUMAN	STYX	CENTER	0.999	1	0.998	0.998	KHKHKKHKRKEIIDASDKEGMSPAKRTKLDD
sp|Q14847|LASP1_HUMAN_150 151 152_C	R.MGPSGGEGMEPERRDSQDG(SSY)phosR.R	R.MGPSGGEGMEPERRDSQDG(SSY)phosR.R	-0.890805	0.185755	15	3	sp|Q14847|LASP1_HUMAN	STYX	CENTER	0.9998	0.9978	0.927	0.822	GGEGMEPERRDSQDGSSYRRPLEQQQPHHIP GEGMEPERRDSQDGSSYRRPLEQQQPHHIPT EGMEPERRDSQDGSSYRRPLEQQQPHHIPTS
sp|Q15773|MLF2_HUMAN_216	R.LESphosSGAGGR.R	R.RLESphosSGAGGR.R	-0.890805	-0.306843	8	1	sp|Q15773|MLF2_HUMAN	STYX	CENTER	1	0.9995	0.947	0.901	SRFRQQRPLEFRRLESSGAGGRRAEGPPRLA
sp|Q5VTL8|PR38B_HUMAN_527	R.SphosQSIEQESQEK.Q	R.RRSphosQSIEQESQEK.Q	-0.890805	-0.103752	7	9	sp|Q5VTL8|PR38B_HUMAN	STYQ	CENTER	1	1	0.995	0.991	HSDSKDQSDKHDRRRSQSIEQESQEKQHKNK
sp|Q5VZK9|CARL1_HUMAN_1324	R.TFSphosQEVSR.R	R.TFSphosQEVSR.R	-0.890805	-0.171048	3	2	sp|Q5VZK9|CARL1_HUMAN	STYQ	CENTER	0.9993	0.9996	0.995	0.991	ERDGQSSPQPSPRTFSQEVSRRSWGQQAQEY
sp|Q5VZL5|ZMYM4_HUMAN_882 883_C	R.KD(ST)phosPVIANVVSL.A	R.KD(ST)phosPVIANVVSLASAPAAQPTVNSN.S	-0.890805	-0.148146	3	7	sp|Q5VZL5|ZMYM4_HUMAN	STYX	CENTER	1	0.9976	1	1	MVQAASAGPPSLRKDSTPVIANVVSLASAPA VQAASAGPPSLRKDSTPVIANVVSLASAPAA
sp|Q96EQ0|SGTB_HUMAN_295	R.SRSphosFSSSAEEHS.-	R.SRSphosFSSSAEEHS.-	-0.890805	0.300315	1	1	sp|Q96EQ0|SGTB_HUMAN	STYX	CENTER	0.9772	0.9809	0.985	0.902	NPELIEQLRNHIRSRSFSSSAEEHS______
sp|Q96II8|LRCH3_HUMAN_415	R.RISphosHEGSPVKPVAIR.E	R.RISphosHEGSPVKPVAIR.E	-0.890805	0.311286	13	16	sp|Q96II8|LRCH3_HUMAN	STYX	CENTER	1	1	0.997	0.998	SLSSQFMAYIEQRRISHEGSPVKPVAIREFQ
sp|Q96N46|TTC14_HUMAN_669 670 671_C	R.H(STS)phosPASSEYSWK.S	R.H(STS)phosPASSEYSWK.S	-0.890805	0.0613077	1	1	sp|Q96N46|TTC14_HUMAN	STYX	CENTER	0.9906	1	0.679	0.941	RKEHYRRWEPGSVRHSTSPASSEYSWKSVEK KEHYRRWEPGSVRHSTSPASSEYSWKSVEKY EHYRRWEPGSVRHSTSPASSEYSWKSVEKYK
sp|Q9BRD0|BUD13_HUMAN_135	R.HGTphosPDPSPR.K	R.HGTphosPDPSPR.K	-0.890805	0.354355	9	5	sp|Q9BRD0|BUD13_HUMAN	STYX	CENTER	0.9945	0.9992	0.996	0.997	RHDTPDSSPRRVRHGTPDPSPRKDRHDTPDP
sp|Q9BVC5|ASHWN_HUMAN_145 146 147 148_C	R.KLSN(SSSS)phosVSPLILSS.N	R.KLSN(SSSS)phosVSPLILSSNLPVNNK.T	-0.890805	0.385833	11	17	sp|Q9BVC5|ASHWN_HUMAN	STYX	CENTER	0.9981	0.9981	0.994	0.98	PQASFTSNAFRKLSNSSSSVSPLILSSNLPV QASFTSNAFRKLSNSSSSVSPLILSSNLPVN ASFTSNAFRKLSNSSSSVSPLILSSNLPVNN SFTSNAFRKLSNSSSSVSPLILSSNLPVNNK
sp|Q9H0C8|ILKAP_HUMAN_82	R.KTSphosEEEKNGSEELVEK.K	R.KTSphosEEEKNGSEELVEK.K	-0.890805	0.349031	5	2	sp|Q9H0C8|ILKAP_HUMAN	STYX	CENTER	1	1	0.967	0.956	SQMVKTEGKGAKRKTSEEEKNGSEELVEKKV
sp|Q9NWQ8|PHAG1_HUMAN_359	R.SPSSCNDLYphosATVK.D	R.SPSSCNDLYphosATVK.D	-0.890805	0.173782	2	3	sp|Q9NWQ8|PHAG1_HUMAN	STYX	CENTER	0.9998	1	0.998	0.997	IQGDPQRSPSSCNDLYATVKDFEKTPNSTLP
sp|Q9UHB7|AFF4_HUMAN_1043	K.NSYNNSQAPSphosPGLGSK.A	K.NSYNNSQAPSphosPGLGSK.A	-0.890805	0.197629	16	23	sp|Q9UHB7|AFF4_HUMAN	STYX	CENTER	1	1	0.998	0.998	LTEHLKNSYNNSQAPSPGLGSKAVGMPSPVS
sp|Q9UPV9|TRAK1_HUMAN_719	R.RLSphosLAESF.T	R.RLSphosLAESFTNTR.E	-0.890805	-0.0133226	1	2	sp|Q9UPV9|TRAK1_HUMAN	STYX	CENTER	0.9612	1	0.996	0.998	LKSTPVATPCTPRRLSLAESFTNTRESTTTM
sp|Q9UQB8|BAIP2_HUMAN_384	K.AIFSphosHAAGDNSTLLSFK.E	K.AIFSphosHAAGDNSTLLSFK.E	-0.890805	-0.290165	6	7	sp|Q9UQB8|BAIP2_HUMAN	STYX	CENTER	1	1	0.998	0.998	AGLERNGRMRVKAIFSHAAGDNSTLLSFKEG
tr|B7ZC06|B7ZC06_HUMAN_58 59 60 61_C	K.NGSNPE(TTTS)phosGGCHSPEDIQDILK.V	K.NGSNPE(TTTS)phosGGCHSPEDIQDILK.V	-0.890805	-0.225314	1	1	tr|B7ZC06|B7ZC06_HUMAN	STYX	CENTER	0.977	0.9238	0.522	0.549	GAKKKKKIKNGSNPETTTSGGCHSPEDIQDI AKKKKKIKNGSNPETTTSGGCHSPEDIQDIL KKKKKIKNGSNPETTTSGGCHSPEDIQDILK KKKKIKNGSNPETTTSGGCHSPEDIQDILKV
sp|Q99575|POP1_HUMAN_367	K.SAVCIADPLPTPSphosQEK.S	K.SAVCIADPLPTPSphosQEKSQTELPDEK.L	-0.889226	3.45424	8	17	sp|Q99575|POP1_HUMAN	STYQ	Q1	1	1	0.992	0.981	PIKSAVCIADPLPTPSQEKSQTELPDEKIGK
sp|Q9P227|RHG23_HUMAN_610 611 612_C	R.R(SSY)phosLLAITTER.S	R.R(SSY)phosLLAITTER.S	-0.888438	0.00835882	2	3	sp|Q9P227|RHG23_HUMAN	STYX	CENTER	1	1	0.997	1	RHYSQDCSSIKAGRRSSYLLAITTERSKSCD HYSQDCSSIKAGRRSSYLLAITTERSKSCDD YSQDCSSIKAGRRSSYLLAITTERSKSCDDG
sp|P18615|NELFE_HUMAN_91	R.SRTphosLEGK.L	R.SRTphosLEGK.L	-0.885032	1.37542	2	3	sp|P18615|NELFE_HUMAN	STYX	Q1	0.9655	0.9611	0.928	0.988	AIKAETKNSGFKRSRTLEGKLKDPEKGPVPT
sp|Q9UKL0|RCOR1_HUMAN_127	R.RSphosQERDNLGML.V	R.SphosQERDNLGMLVWSPNQNLSEAK.L	-0.885032	-0.103752	2	1	sp|Q9UKL0|RCOR1_HUMAN	STYQ	CENTER	0.9582	1	1	0.996	QAVVPDFDPAKLARRSQERDNLGMLVWSPNQ
sp|O75886|STAM2_HUMAN_374	K.LVNEAPVYSVYphosSK.L	K.LVNEAPVYSVYphosSK.L	-0.883726	0.133188	2	2	sp|O75886|STAM2_HUMAN	STYX	CENTER	0.9997	0.9999	0.97	0.973	ELYNKLVNEAPVYSVYSKLHPPAHYPPASSG
sp|Q92797|SYMPK_HUMAN_510	S.SMSphosPLEEEAPQAK.R	S.SMSphosPLEEEAPQAK.R	-0.881902	-0.733108	8	1	sp|Q92797|SYMPK_HUMAN	STYX	Q4	1	0.9899	0.988	0.984	AQGQAISVVGSLSSMSPLEEEAPQAKRRPEP
sp|Q9P2R6|RERE_HUMAN_1266	R.TLSEYARPHVMSphosPTNR.N	R.PHVMSphosPTNR.N	-0.881902	0.266892	2	10	sp|Q9P2R6|RERE_HUMAN	STYX	CENTER	0.9999	1	0.993	0.991	PALRTLSEYARPHVMSPTNRNHPFYMPLNPT
sp|Q09666|AHNK_HUMAN_440	K.FSphosVSGAK.G	K.FSphosVSGAK.G	-0.881382	0.726323	2	1	sp|Q09666|AHNK_HUMAN	STYX	Q1	0.9984	0.9807	0.991	0.992	PGSKLNVPKMKVPKFSVSGAKGEETGIDVTL
sp|O75128|COBL_HUMAN_566	R.NNNAGSphosFDSEGVASR.R	R.NNNAGSphosFDSEGVASR.R	-0.881122	-0.306843	2	3	sp|O75128|COBL_HUMAN	STYX	CENTER	1	1	0.995	0.995	PVDSGLFSNRNNNAGSFDSEGVASRRDSLAP
sp|O95210|STBD1_HUMAN_145	R.NESphosLESPMGEWGFQK.G	R.NESphosLESPMGEWGFQK.G	-0.881122	-0.249315	4	2	sp|O95210|STBD1_HUMAN	STYX	CENTER	1	0.9999	0.998	0.991	ETSNSRSYSEVSRNESLESPMGEWGFQKGQE
sp|Q8N1F7|NUP93_HUMAN_52	R.TLTRTSphosQETADVK.A	R.TLTRTSphosQETADVK.A	-0.881122	-0.393258	2	3	sp|Q8N1F7|NUP93_HUMAN	STYQ	CENTER	0.9908	0.9964	0.963	0.988	QQAGERLRSRTLTRTSQETADVKASVLLGSR
sp|Q9Y4E5|ZN451_HUMAN_1027	L.LNSISDTTKECDSphosDDNMGAK.N	K.ECDSphosDDNMGAK.N	-0.881122	0.173782	6	1	sp|Q9Y4E5|ZN451_HUMAN	STYX	CENTER	1	0.9996	0.992	1	CALLNSISDTTKECDSDDNMGAKNTSIGEEF
sp|O43290|SNUT1_HUMAN_596	R.SANGGSphosESDGEENIGWSTVNLDEEK.Q	R.SANGGSphosESDGEENIGWSTVNLDEEK.Q	-0.878787	0.650596	2	3	sp|O43290|SNUT1_HUMAN	STYX	Q1	0.9999	1	0.75	0.948	LMDFERDEERSANGGSESDGEENIGWSTVNL
sp|O15027|SC16A_HUMAN_1356	R.SphosLHSAHSLASR.R	R.SphosLHSAHSLASR.R	-0.876458	1.22689	2	7	sp|O15027|SC16A_HUMAN	STYX	Q1	0.998	0.9999	0.534	0.997	EEVDRRSVHSEHSARSLHSAHSLASRRSSLS
sp|Q9H792|PEAK1_HUMAN_648	K.SFLGTSphosGELSVK.E	K.SFLGTSphosGELSVK.E	-0.874653	-0.163253	2	1	sp|Q9H792|PEAK1_HUMAN	STYX	CENTER	0.9997	0.9972	0.979	0.934	NAYDNLAIYKSFLGTSGELSVKEKTTSVISH
sp|P11171|41_HUMAN_84 85_C	R.LF(SS)phosFLK.R	R.LF(SS)phosFLK.R	-0.872595	-0.209546	4	1	sp|P11171|41_HUMAN	STYX	CENTER	0.9892	0.9932	1	1	NKERTSESRGLSRLFSSFLKRPKSQVSEEEG KERTSESRGLSRLFSSFLKRPKSQVSEEEGK
sp|O60885|BRD4_HUMAN_294 295 296_C	R.KAD(TTT)phosPTTIDPIHEPPSLPPEPK.T	R.KAD(TTT)phosPTTIDPIHEPPSLPPEPK.T	-0.871953	-0.323717	4	1	sp|O60885|BRD4_HUMAN	STYX	CENTER	0.9941	0.9921	0.988	0.631	PQPVKTKKGVKRKADTTTPTTIDPIHEPPSL QPVKTKKGVKRKADTTTPTTIDPIHEPPSLP PVKTKKGVKRKADTTTPTTIDPIHEPPSLPP
sp|Q96N46|TTC14_HUMAN_671	R.HSTSphosPASSEYSWK.S	R.HSTSphosPASSEYSWK.S	-0.871953	-0.112712	2	6	sp|Q96N46|TTC14_HUMAN	STYX	CENTER	0.9986	0.9983	0.992	0.985	EHYRRWEPGSVRHSTSPASSEYSWKSVEKYK
sp|Q9UQ35|SRRM2_HUMAN_1061	K.GQSphosQTSPDHR.S	K.GQSphosQTSPDHR.S	-0.871568	1.02844	4	1	sp|Q9UQ35|SRRM2_HUMAN	STYQ	Q1	0.9979	0.9943	0.996	0.993	GESYFGVSSLQLKGQSQTSPDHRSDTSSPEV
sp|Q14739|LBR_HUMAN_128	K.LTPLILKPFGNSphosISR.Y	K.LTPLILKPFGNSphosISR.Y	-0.871568	-0.504289	14	8	sp|Q14739|LBR_HUMAN	STYX	Q4	1	1	0.991	0.987	VEVKLTPLILKPFGNSISRYNGEPEHIERND
sp|Q9UHB7|AFF4_HUMAN_549	R.QKSphosPAQSDSTTQR.R	R.QKSphosPAQSDSTTQR.R	-0.871568	0.0215319	6	2	sp|Q9UHB7|AFF4_HUMAN	STYX	CENTER	1	0.9996	0.998	0.997	KTIQKGSESGRGRQKSPAQSDSTTQRRTVGK
sp|Q641Q2|WAC2A_HUMAN_478	G.KVQSphosTADIFGDEEGDLFK.E	G.KVQSphosTADIFGDEEGDLFK.E	-0.87144	1.11864	1	1	sp|Q641Q2|WAC2A_HUMAN	STYX	Q1	1	1	0.983	0.931	FSAPHSKPSKTGKVQSTADIFGDEEGDLFKE
sp|Q8TC07|TBC15_HUMAN_70 71 72_C	R.KD(SSS)phosVVEWTQAPK.E	R.KD(SSS)phosVVEWTQAPK.E	-0.87144	0.51955	5	12	sp|Q8TC07|TBC15_HUMAN	STYX	Q1	1	1	0.999	0.999	DDALDSSSILYARKDSSSVVEWTQAPKERGH DALDSSSILYARKDSSSVVEWTQAPKERGHR ALDSSSILYARKDSSSVVEWTQAPKERGHRG
sp|Q96N67|DOCK7_HUMAN_963 964_C	R.M(SS)phosHTETSSFLQTLTGR.L	R.M(SS)phosHTETSSFLQTLTGR.L	-0.87144	0.500312	3	8	sp|Q96N67|DOCK7_HUMAN	STYX	Q1	0.9951	0.9982	0.935	0.989	SAESTQAMDRSCNRMSSHTETSSFLQTLTGR AESTQAMDRSCNRMSSHTETSSFLQTLTGRL
sp|P51116|FXR2_HUMAN_524 525_C	K.DPDSNPYSLLD(TS)phosEPEPPVDSEPGEPPPASAR.R	K.DPDSNPYSLLD(TS)phosEPEPPVDSEPGEPPPASAR.R	-0.87144	-0.595046	3	2	sp|P51116|FXR2_HUMAN	STYX	Q4	0.9935	0.994	0.994	0.998	SVLKDPDSNPYSLLDTSEPEPPVDSEPGEPP VLKDPDSNPYSLLDTSEPEPPVDSEPGEPPP
sp|Q92560|BAP1_HUMAN_369	R.LPAFLDNHNYAKSphosPMQEEEDLAAGVGR.S	R.LPAFLDNHNYAKSphosPMQEEEDLAAGVGR.S	-0.87144	-1.41118	3	1	sp|Q92560|BAP1_HUMAN	STYX	Q4	1	0.9999	0.998	0.957	VQRLPAFLDNHNYAKSPMQEEEDLAAGVGRS
sp|Q9BSJ6|PIMRE_HUMAN_16	R.SphosLQHQEQLEDSK.E	R.SphosLQHQEQLEDSK.E	-0.87144	-0.583361	5	3	sp|Q9BSJ6|PIMRE_HUMAN	STYX	Q4	1	1	0.998	0.999	MASRWQNMGTSVRRRSLQHQEQLEDSKELQP
sp|O15014|ZN609_HUMAN_358	R.FCDSphosPTSDLEMR.N	R.FCDSphosPTSDLEMR.N	-0.87144	0.112382	6	9	sp|O15014|ZN609_HUMAN	STYX	CENTER	1	1	0.995	0.995	LDCTRHDWAPPRFCDSPTSDLEMRNGRGRGK
sp|P08727|K1C19_HUMAN_395	R.SLLEGQEDHYNNLSphosASKVL.-	R.SLLEGQEDHYNNLSphosASK.V	-0.87144	-0.204281	8	10	sp|P08727|K1C19_HUMAN	STYX	CENTER	1	1	0.997	0.996	YRSLLEGQEDHYNNLSASKVL__________
sp|P22670|RFX1_HUMAN_159	K.PGHVSphosPLQLTNIQVPQQALPTQR.L	K.PGHVSphosPLQLTNIQVPQQALPTQR.L	-0.87144	0.411541	7	10	sp|P22670|RFX1_HUMAN	STYX	CENTER	1	1	0.999	0.998	RLLVQTSVQAKPGHVSPLQLTNIQVPQQALP
sp|P51116|FXR2_HUMAN_506	S.SSphosISSVLK.D	S.SSphosISSVLK.D	-0.87144	0.112382	1	1	sp|P51116|FXR2_HUMAN	STYX	CENTER	0.9361	0.9216	0.98	0.922	GPPPAPRPTSRYNSSSISSVLKDPDSNPYSL
sp|Q09666|AHNK_HUMAN_135	R.LKSphosEDGVEGDLGETQ.S	R.LKSphosEDGVEGDLGETQSR.T	-0.87144	0.197629	52	58	sp|Q09666|AHNK_HUMAN	STYX	CENTER	1	1	0.999	0.999	EYQRIYTTKIKPRLKSEDGVEGDLGETQSRT
sp|Q13435|SF3B2_HUMAN_307	R.SSLGQSphosASETEEDTVSVSK.K	R.SSLGQSphosASETEEDTVSVSKK.E	-0.87144	-0.00518771	60	47	sp|Q13435|SF3B2_HUMAN	STYX	CENTER	0.9995	0.9991	0.998	0.998	EEEEMETDARSSLGQSASETEEDTVSVSKKE
sp|Q13523|PRP4B_HUMAN_427 437	R.SphosKDASPINRWSphosPTR.R	R.SphosKDASPINRWSphosPTR.R	-0.87144	-0.155857	1	2	sp|Q13523|PRP4B_HUMAN	STYX	CENTER	0.9489	0.9975	0.705	0.952	PRTRPRDDILSRRERSKDASPINRWSPTRRR SRRERSKDASPINRWSPTRRRSRSPIRRRSR
sp|Q13557|KCC2D_HUMAN_280	R.STVASphosMMHR.Q	R.STVASphosMMHR.Q	-0.87144	-0.429327	1	3	sp|Q13557|KCC2D_HUMAN	STYX	CENTER	0.9993	0.9977	0.992	0.994	EALKHPWICQRSTVASMMHRQETVDCLKKFN
sp|Q13619|CUL4A_HUMAN_10	R.KGSphosFSAL.V	R.KGSphosFSALVGR.T	-0.87144	0.364924	8	9	sp|Q13619|CUL4A_HUMAN	STYX	CENTER	0.9998	0.9999	0.993	0.993	______MADEAPRKGSFSALVGRTNGLTKPA
sp|Q14980|NUMA1_HUMAN_1969	R.RASphosMQPIQIAEGT.G	R.RASphosMQPIQIAEGTGITTR.Q	-0.87144	0.0613077	18	23	sp|Q14980|NUMA1_HUMAN	STYX	CENTER	1	1	0.999	0.999	EEMKTGDPQETLRRASMQPIQIAEGTGITTR
sp|Q15035|TRAM2_HUMAN_346	K.RESphosGYHENGVVK.A	K.RESphosGYHENGVVK.A	-0.87144	-0.273677	1	7	sp|Q15035|TRAM2_HUMAN	STYX	CENTER	0.9999	1	0.5	0.977	VPATPRLPARLIKRESGYHENGVVKAENGTS
sp|Q15061|WDR43_HUMAN_77	R.LQAKESphosPQR.K	R.LQAKESphosPQRK.K	-0.87144	0.173782	39	35	sp|Q15061|WDR43_HUMAN	STYX	CENTER	0.9984	0.9998	1	1	CTCLAWAPARLQAKESPQRKKRKSEAVGMSN
sp|Q5THJ4|VP13D_HUMAN_2093	R.KTTSphosTEEPR.G	K.TTSphosTEEPR.G	-0.87144	-0.0820743	1	2	sp|Q5THJ4|VP13D_HUMAN	STYX	CENTER	0.999	0.9998	0.936	0.971	ASPTGIPKHSLRKTTSTEEPRGTHSQGQFTM
sp|Q5VUA4|ZN318_HUMAN_1945	R.SphosKDFQVK.K	R.SphosKDFQVK.K	-0.87144	0.244172	9	7	sp|Q5VUA4|ZN318_HUMAN	STYX	CENTER	0.997	0.9991	1	1	SRTSRYRSLKLKRERSKDFQVKKIYELAVWD
sp|Q6IN85|P4R3A_HUMAN_741	K.TNLSGRQSphosPSFK.L	K.TNLSGRQSphosPSFK.L	-0.87144	0.185755	13	21	sp|Q6IN85|P4R3A_HUMAN	STYX	CENTER	0.9983	0.9992	0.992	0.993	EEKEVLLKTNLSGRQSPSFKLSLSSGTKTNL
sp|Q6P3W7|SCYL2_HUMAN_677	K.RASphosLTLEEK.Q	K.RASphosLTLEEK.Q	-0.87144	0.311286	6	5	sp|Q6P3W7|SCYL2_HUMAN	STYX	CENTER	0.9983	0.9988	0.973	0.969	SENKEDGLQNKHKRASLTLEEKQKLAKEQEQ
sp|Q6UB98|ANR12_HUMAN_1367 1368_C	R.DLSNVSNIH(SS)phosFATSPTGASNSK.Y	R.DLSNVSNIH(SS)phosFATSPTGASNSK.Y	-0.87144	-0.241255	1	1	sp|Q6UB98|ANR12_HUMAN	STYX	CENTER	0.9684	0.9646	0.498	0.49	SNVPERDLSNVSNIHSSFATSPTGASNSKYV NVPERDLSNVSNIHSSFATSPTGASNSKYVS
sp|Q6UWZ7|ABRX1_HUMAN_403 404_C	K.GFGE(YS)phosRSPTF.-	K.GFGE(YS)phosRSPTF.-	-0.87144	0.249874	5	4	sp|Q6UWZ7|ABRX1_HUMAN	STYX	CENTER	0.9958	0.9996	0.501	0.506	PETDEEIEKMKGFGEYSRSPTF_________ ETDEEIEKMKGFGEYSRSPTF__________
sp|Q76L83|ASXL2_HUMAN_1319	K.LYGSphosPTQIGPSYR.G	K.LYGSphosPTQIGPSYR.G	-0.87144	-0.122843	7	4	sp|Q76L83|ASXL2_HUMAN	STYX	CENTER	1	0.9999	0.996	0.996	QPLLLPPLQTPKLYGSPTQIGPSYRGMINVS
sp|Q8IY33|MILK2_HUMAN_125	R.ASEDSphosEEEPSGK.K	R.ASEDSphosEEEPSGK.K	-0.87144	-0.429327	1	2	sp|Q8IY33|MILK2_HUMAN	STYX	CENTER	0.9988	1	0.978	0.997	SPIGGMAGVKRASEDSEEEPSGKKAPVQAAK
sp|Q96BH1|RNF25_HUMAN_450	R.RESphosLGLESK.D	R.RESphosLGLESK.D	-0.87144	0.300147	1	2	sp|Q96BH1|RNF25_HUMAN	STYX	CENTER	0.9975	0.9995	0.995	0.997	LPRGQGAYRPGTRRESLGLESKDGS______
sp|Q96JM7|LMBL3_HUMAN_670	R.SphosAVFLSFK.S	R.SphosAVFLSFK.S	-0.87144	0.0997818	5	10	sp|Q96JM7|LMBL3_HUMAN	STYX	CENTER	0.9996	0.9998	0.997	0.994	RGAREEPTVQQAQRRSAVFLSFKSPIPCLPL
sp|Q96N67|DOCK7_HUMAN_432	R.KGSphosWSER.R	R.KGSphosWSER.R	-0.87144	0.197629	5	3	sp|Q96N67|DOCK7_HUMAN	STYX	CENTER	0.9688	0.9978	0.987	0.984	RDSTEVEISTGERKGSWSERRNSSIVGRRSL
sp|Q99661|KIF2C_HUMAN_519	R.MEGAEINKSphosLLALK.E	R.MEGAEINKSphosLLALK.E	-0.87144	-0.0606828	5	8	sp|Q99661|KIF2C_HUMAN	STYX	CENTER	1	1	1	1	SADRQTRMEGAEINKSLLALKECIRALGQNK
sp|Q9BY89|K1671_HUMAN_1441	K.GRPSphosLTGENLEAK.M	K.GRPSphosLTGENLEAK.M	-0.87144	-0.0188626	12	10	sp|Q9BY89|K1671_HUMAN	STYX	CENTER	1	1	0.992	0.976	HEARERRREQPKGRPSLTGENLEAKMGPCWW
sp|Q9H8G2|CAAP1_HUMAN_92 93 94_C	R.STD(SSS)phosVSGSLQQETK.Y	R.STD(SSS)phosVSGSLQQETK.Y	-0.87144	0.106907	3	4	sp|Q9H8G2|CAAP1_HUMAN	STYX	CENTER	0.9923	0.9934	0.998	0.997	SSVERSERRKRRSTDSSSVSGSLQQETKYIL SVERSERRKRRSTDSSSVSGSLQQETKYILP VERSERRKRRSTDSSSVSGSLQQETKYILPT
sp|Q9H8M2|BRD9_HUMAN_14 15 16_C	R.(SSY)phosEDYADKPLEKPLK.L	R.(SSY)phosEDYADKPLEKPLK.L	-0.87144	0.406443	1	3	sp|Q9H8M2|BRD9_HUMAN	STYX	CENTER	1	1	0.996	1	__MGKKHKKHKAEWRSSYEDYADKPLEKPLK _MGKKHKKHKAEWRSSYEDYADKPLEKPLKL MGKKHKKHKAEWRSSYEDYADKPLEKPLKLV
sp|Q9HAZ1|CLK4_HUMAN_138	R.SphosIEDDEEGHLICQSGDVLR.A	R.SphosIEDDEEGHLICQSGDVLR.A	-0.87144	-0.0326684	3	7	sp|Q9HAZ1|CLK4_HUMAN	STYX	CENTER	1	1	0.997	0.997	SHQSRSKSHRRKRSRSIEDDEEGHLICQSGD
sp|Q9NPI1|BRD7_HUMAN_279	R.EREDSphosGDAEAHAFK.S	R.EDSphosGDAEAHAFK.S	-0.87144	0.0742468	6	9	sp|Q9NPI1|BRD7_HUMAN	STYX	CENTER	1	1	1	1	QSGEDGGCWQREREDSGDAEAHAFKSPSKEN
sp|Q9Y4C1|KDM3A_HUMAN_264 265_C	K.RK(SS)phosENNGTLVSK.Q	K.RK(SS)phosENNGTLVSK.Q	-0.87144	0.396175	1	5	sp|Q9Y4C1|KDM3A_HUMAN	STYX	CENTER	0.9989	0.9999	0.998	0.998	VTCGNSARIGAVKRKSSENNGTLVSKQAKSC TCGNSARIGAVKRKSSENNGTLVSKQAKSCS
tr|B7ZC06|B7ZC06_HUMAN_66	K.NGSNPETTTSGGCHSphosPEDIQDILK.V	K.NGSNPETTTSGGCHSphosPEDIQDILK.V	-0.87144	-0.393258	1	1	tr|B7ZC06|B7ZC06_HUMAN	STYX	CENTER	0.9806	0.9926	0.989	0.673	KNGSNPETTTSGGCHSPEDIQDILKVLVSDL
sp|Q92576|PHF3_HUMAN_1925	R.FYSphosDSHHLK.R	R.FYSphosDSHHLK.R	-0.869519	0.725485	4	12	sp|Q92576|PHF3_HUMAN	STYX	Q1	0.9974	1	0.989	0.995	DRPFNRGKGDRQRFYSDSHHLKRERHEKEWE
sp|Q86YV5|PRAG1_HUMAN_826 827_C	R.AA(SS)phosPDGFFWTQGSPKPGTASPK.L	R.AA(SS)phosPDGFFWTQGSPKPGTASPK.L	-0.869519	0.0742468	8	16	sp|Q86YV5|PRAG1_HUMAN	STYX	CENTER	1	1	0.997	1	QPPPLPQKKIVSRAASSPDGFFWTQGSPKPG PPPLPQKKIVSRAASSPDGFFWTQGSPKPGT
sp|Q68DK7|MSL1_HUMAN_288	K.LFQGYETphosEEREETELSEK.L	K.LFQGYETphosEEREETELSEK.L	-0.86531	-1.14815	2	3	sp|Q68DK7|MSL1_HUMAN	STYX	Q4	0.9998	1	0.996	0.993	KDNEKERHKLFQGYETEEREETELSEKIKLE
sp|O75132|ZBED4_HUMAN_640	R.GTELSGASSphosFDDTNEK.F	R.GTELSGASSphosFDDTNEK.F	-0.864421	-0.64627	2	2	sp|O75132|ZBED4_HUMAN	STYX	Q4	0.9986	0.9975	0.972	0.947	PDTRVPRGTELSGASSFDDTNEKFYDSHPVA
sp|Q9Y446|PKP3_HUMAN_180	R.ADYDTLSphosLR.S	R.ADYDTLSphosLR.S	-0.864421	-0.178519	4	1	sp|Q9Y446|PKP3_HUMAN	STYX	CENTER	0.9993	0.9946	0.984	0.505	HERGGVGSRADYDTLSLRSLRLGPGGLDDRY
sp|P16070|CD44_HUMAN_686	K.LVINSphosGNGAVEDR.K	K.LVINSphosGNGAVEDR.K	-0.863405	-0.128001	2	4	sp|P16070|CD44_HUMAN	STYX	CENTER	1	1	1	1	NSRRRCGQKKKLVINSGNGAVEDRKPSGLNG
sp|Q6P2Q9|PRP8_HUMAN_1355	R.SphosGMSHEEDQLIPNLYR.Y	R.SphosGMSHEEDQLIPNLYR.Y	-0.863405	0.0350762	2	1	sp|Q6P2Q9|PRP8_HUMAN	STYX	CENTER	1	1	0.5	0.5	LRWSKQTDVGITHFRSGMSHEEDQLIPNLYR
sp|Q14684|RRP1B_HUMAN_392	R.VFCVEEEDSphosESSLQK.R	R.VFCVEEEDSphosESSLQK.R	-0.862645	-0.0188626	12	10	sp|Q14684|RRP1B_HUMAN	STYX	CENTER	1	1	0.993	0.995	EKEKGSRVFCVEEEDSESSLQKRRRKKKKKH
sp|Q86UK7|ZN598_HUMAN_437	F.SVTGPAAPGCVGVPGALPPPSphosPK.L	F.SVTGPAAPGCVGVPGALPPPSphosPK.L	-0.862645	0.255577	22	46	sp|Q86UK7|ZN598_HUMAN	STYX	CENTER	1	1	0.995	0.999	AAPGCVGVPGALPPPSPKLKDEDFPSLSAST
sp|O15042|SR140_HUMAN_236	R.FEPPQSphosDSDGQRR.S	R.FEPPQSphosDSDGQR.R	-0.862518	-0.537486	4	8	sp|O15042|SR140_HUMAN	STYX	Q4	0.9996	0.9999	0.991	0.99	RHKTKGRLSRFEPPQSDSDGQRRSMDAPSRR
sp|P21291|CSRP1_HUMAN_81	K.GYGYGQGAGTLSphosTDKGESLGIK.H	K.GYGYGQGAGTLSphosTDKGESLGIK.H	-0.862138	0.0284277	2	2	sp|P21291|CSRP1_HUMAN	STYX	CENTER	0.9998	0.9935	0.959	0.983	YGPKGYGYGQGAGTLSTDKGESLGIKHEEAP
sp|Q99590|SCAFB_HUMAN_961 962 963_C	R.IDRD(SYS)phosPR.W	R.IDRD(SYS)phosPR.W	-0.862138	0.0859966	2	2	sp|Q99590|SCAFB_HUMAN	STYX	CENTER	0.9899	0.9784	1	1	RTKSKSSSFGRIDRDSYSPRWKGRWANDGWR TKSKSSSFGRIDRDSYSPRWKGRWANDGWRC KSKSSSFGRIDRDSYSPRWKGRWANDGWRCP
sp|O60885|BRD4_HUMAN_1126	R.SEPFSphosPSLRPEPPKHPESIK.A	R.SEPFSphosPSLRPEPPKHPESIK.A	-0.861885	1.17378	16	37	sp|O60885|BRD4_HUMAN	STYX	Q1	1	1	0.996	0.994	KEEKIHSPIIRSEPFSPSLRPEPPKHPESIK
sp|P54886|P5CS_HUMAN_79	K.LGSphosAVVTR.G	K.LGSphosAVVTR.G	-0.861885	-1.09971	6	2	sp|P54886|P5CS_HUMAN	STYX	Q4	0.9984	0.9987	0.998	0.997	RSELKHAKRIVVKLGSAVVTRGDECGLALGR
sp|P05787|K2C8_HUMAN_253	R.SphosLDMDSIIAEVK.A	R.SphosLDMDSIIAEVK.A	-0.861885	0.272418	24	4	sp|P05787|K2C8_HUMAN	STYX	CENTER	1	0.9999	0.99	0.982	QISDTSVVLSMDNSRSLDMDSIIAEVKAQYE
sp|Q8WX93|PALLD_HUMAN_725 726_C	R.SAPAMQ(SS)phosGSFNYARPK.Q	R.SAPAMQ(SS)phosGSFNYARPK.Q	-0.861885	-0.118699	4	8	sp|Q8WX93|PALLD_HUMAN	STYX	CENTER	0.9998	1	0.666	0.944	EPMSALASRSAPAMQSSGSFNYARPKQFIAA PMSALASRSAPAMQSSGSFNYARPKQFIAAQ
sp|Q96L92|SNX27_HUMAN_51	K.SESphosGYGFNVR.G	K.SESphosGYGFNVR.G	-0.861885	-0.225662	8	4	sp|Q96L92|SNX27_HUMAN	STYX	CENTER	0.9997	0.9999	0.995	0.99	GGGGGPRVVRIVKSESGYGFNVRGQVSEGGQ
sp|Q9UQ35|SRRM2_HUMAN_1318 1326	K.ELSphosNSPLRENSphosFGSPLEFR.N	K.ELSphosNSPLRENSphosFGSPLEFR.N	-0.861885	-0.118398	10	1	sp|Q9UQ35|SRRM2_HUMAN	STYX	CENTER	0.9895	0.9403	0.807	0.626	SSWGGPHFSPEHKELSNSPLRENSFGSPLEF SPEHKELSNSPLRENSFGSPLEFRNSGPLGT
sp|P78545|ELF3_HUMAN_254	R.KLSphosKEYWDCLEGK.K	R.KLSphosKEYWDCLEGK.K	-0.856589	0.436817	6	9	sp|P78545|ELF3_HUMAN	STYX	CENTER	1	1	0.992	0.997	DPKHGKRKRGRPRKLSKEYWDCLEGKKSKHA
sp|O00178|GTPB1_HUMAN_481	K.GMVMVSphosPR.L	K.GMVMVSphosPR.L	-0.85546	0.149535	2	3	sp|O00178|GTPB1_HUMAN	STYX	CENTER	0.9951	0.9998	1	1	KKIKRSSIRKGMVMVSPRLNPQASWEFEAEI
sp|Q9HAW4|CLSPN_HUMAN_720	K.SLSphosSDSTLLLFK.D	K.SLSphosSDSTLLLFK.D	-0.85283	2.46254	4	4	sp|Q9HAW4|CLSPN_HUMAN	STYX	Q1	0.998	0.9975	0.991	0.991	EIGKAVGFLSVPKSLSSDSTLLLFKDSSSKM
sp|Q12929|EPS8_HUMAN_685	R.KSphosQMEEVQDELIHR.L	R.RKSphosQMEEVQDELIHR.L	-0.85283	0.0276921	14	32	sp|Q12929|EPS8_HUMAN	STYQ	CENTER	1	1	1	1	RDSQRHKQLPVDRRKSQMEEVQDELIHRLTI
sp|Q14241|ELOA1_HUMAN_542	K.AFSSphosPQEEEEAGFTGR.R	K.AFSSphosPQEEEEAGFTGR.R	-0.85283	0.354355	4	4	sp|Q14241|ELOA1_HUMAN	STYX	CENTER	1	1	0.983	0.976	LELISSFQPKRKAFSSPQEEEEAGFTGRRMN
sp|Q9UKV3|ACINU_HUMAN_551	K.GITEECLKQPSphosLEQK.E	K.GITEECLKQPSphosLEQK.E	-0.85283	0.420208	2	4	sp|Q9UKV3|ACINU_HUMAN	STYX	CENTER	0.9985	0.9994	0.991	0.998	LALAKGITEECLKQPSLEQKEGRRASHTLLP
sp|Q9Y6I3|EPN1_HUMAN_419 420_C	R.TALPTSG(SS)phosAGELELLAGEVPAR.S	R.TALPTSG(SS)phosAGELELLAGEVPAR.S	-0.852456	-1.56318	2	3	sp|Q9Y6I3|EPN1_HUMAN	STYX	Q4	0.9973	0.9964	0.988	0.993	FSDFDRLRTALPTSGSSAGELELLAGEVPAR SDFDRLRTALPTSGSSAGELELLAGEVPARS
sp|P24928|RPB1_HUMAN_1864	K.YSPTSphosPK.Y	K.YSPTSphosPK.Y	-0.852331	0.641931	5	3	sp|P24928|RPB1_HUMAN	STYX	Q1	0.9996	0.9997	0.93	0.928	SSPEYTPTSPKYSPTSPKYSPTSPKYSPTSP
sp|P54259|ATN1_HUMAN_896	R.TLSEYARPHVMSphosPGNR.N	R.TLSEYARPHVMSphosPGNR.N	-0.852331	0.624444	1	1	sp|P54259|ATN1_HUMAN	STYX	Q1	0.9989	0.9995	0.48	0.976	PALRTLSEYARPHVMSPGNRNHPFYVPLGAV
sp|Q86YS3|RFIP4_HUMAN_527	R.SASphosSGLGEFNAR.A	R.SASphosSGLGEFNAR.A	-0.852331	1.75071	1	3	sp|Q86YS3|RFIP4_HUMAN	STYX	Q1	0.9997	0.9999	0.982	0.983	MYKLDCERPGRGRSASSGLGEFNARAREVEL
sp|Q96PN7|TREF1_HUMAN_765	R.SNSIDGSNVTphosVTPGPGEQTVDVEPR.L	R.SNSIDGSNVTphosVTPGPGEQTVDVEPR.L	-0.852331	0.684744	1	1	sp|Q96PN7|TREF1_HUMAN	STYX	Q1	0.9933	0.9952	0.884	0.404	RVLLCRSNSIDGSNVTVTPGPGEQTVDVEPR
sp|P08727|K1C19_HUMAN_9 10_C	R.Q(SS)phosATSSFGGLGGGSVR.F	R.Q(SS)phosATSSFGGLGGGSVR.F	-0.852331	-1.27368	10	3	sp|P08727|K1C19_HUMAN	STYX	Q4	0.9987	0.993	0.992	0.828	_______MTSYSYRQSSATSSFGGLGGGSVR ______MTSYSYRQSSATSSFGGLGGGSVRF
sp|Q9Y3I0|RTCB_HUMAN_300	R.IASphosPEGQDYLK.G	R.IASphosPEGQDYLK.G	-0.852331	-3.03267	3	1	sp|Q9Y3I0|RTCB_HUMAN	STYX	Q4	0.9987	0.9972	0.998	0.992	KIIVNDRQLACARIASPEGQDYLKGMAAAGN
sp|Q9Y6Q9|NCOA3_HUMAN_866 867_C	R.AVSLDSPVSVG(SS)phosPPVK.N	R.AVSLDSPVSVG(SS)phosPPVK.N	-0.852331	-0.543284	1	1	sp|Q9Y6Q9|NCOA3_HUMAN	STYX	Q4	0.9487	0.9074	0.575	0.933	PYNRAVSLDSPVSVGSSPPVKNISAFPMLPK YNRAVSLDSPVSVGSSPPVKNISAFPMLPKQ
sp|A0MZ66|SHOT1_HUMAN_473	K.SLDPENSphosETELER.L	K.SLDPENSphosETELER.L	-0.852331	-0.00518771	1	3	sp|A0MZ66|SHOT1_HUMAN	STYX	CENTER	0.9997	1	0.992	0.99	KSTSSRSLKSLDPENSETELERILRRRKVTA
sp|O43491|E41L2_HUMAN_87 88 89_C	K.(SYT)phosLVVAK.D	K.(SYT)phosLVVAK.D	-0.852331	-0.0899015	5	10	sp|O43491|E41L2_HUMAN	STYX	CENTER	0.9993	0.9992	1.001	1.001	RGISRFIPPWLKKQKSYTLVVAKDGGDKKEP GISRFIPPWLKKQKSYTLVVAKDGGDKKEPT ISRFIPPWLKKQKSYTLVVAKDGGDKKEPTQ
sp|O75494|SRS10_HUMAN_133	R.SphosFDYNYR.R	R.SphosFDYNYR.R	-0.852331	0.0870708	41	37	sp|O75494|SRS10_HUMAN	STYX	CENTER	1	1	0.994	0.994	RSRSRSYERRRSRSRSFDYNYRRSYSPRNSR
sp|O95402|MED26_HUMAN_373	R.AGFSphosPDSSK.A	R.AGFSphosPDSSK.A	-0.852331	-0.00518771	7	1	sp|O95402|MED26_HUMAN	STYX	CENTER	1	0.9038	0.998	0.992	AGLSPAEPLLSRAGFSPDSSKADSDAASSGG
sp|P09496|CLCA_HUMAN_236	R.SphosVLISLK.Q	R.MRSphosVLISLK.Q	-0.852331	-0.323717	3	1	sp|P09496|CLCA_HUMAN	STYX	CENTER	0.9959	0.9906	0.998	0.997	NPKSSKQAKDVSRMRSVLISLKQAPLVH___
sp|P29590|PML_HUMAN_409	K.ASPEAASTphosPRDPIDVDLPEEAER.V	K.ASPEAASTphosPRDPIDVDLPEEAER.V	-0.852331	0.0870708	1	1	sp|P29590|PML_HUMAN	STYX	CENTER	0.9854	0.9999	0.97	0.979	KDAAVSKKASPEAASTPRDPIDVDLPEEAER
sp|Q12959|DLG1_HUMAN_575	R.EQMMNSSISSGSGSphosLR.T	R.EQMMNSSISSGSGSphosLR.T	-0.852331	0.124873	8	5	sp|Q12959|DLG1_HUMAN	STYX	CENTER	0.9991	0.9999	0.982	0.984	LREQMMNSSISSGSGSLRTSQKRSLYVRALF
sp|Q13131|AAPK1_HUMAN_356	K.DFYLATSphosPPDSFLDDHHLTRPHPER.V	K.DFYLATSphosPPDSFLDDHHLTRPHPER.V	-0.852331	0.249784	1	2	sp|Q13131|AAPK1_HUMAN	STYX	CENTER	1	1	0.903	0.982	NRRIMNEAKDFYLATSPPDSFLDDHHLTRPH
sp|Q13547|HDAC1_HUMAN_409 410_C	R.ISIC(SS)phosDKR.L	R.ISIC(SS)phosDKR.L	-0.852331	0.255398	9	4	sp|Q13547|HDAC1_HUMAN	STYX	CENTER	0.999	0.9995	1	0.999	GDEDEDDPDKRISICSSDKRIACEEEFSDSE DEDEDDPDKRISICSSDKRIACEEEFSDSEE
sp|Q14149|MORC3_HUMAN_549 550_C	R.(SS)phosILNAK.N	R.(SS)phosILNAK.N	-0.852331	0.137257	7	7	sp|Q14149|MORC3_HUMAN	STYX	CENTER	0.995	0.9971	1	1	SEPESNSLKRRLSTRSSILNAKNRRLSSQFE EPESNSLKRRLSTRSSILNAKNRRLSSQFEN
sp|Q14980|NUMA1_HUMAN_112	L.YHSTMSSKSphosPR.D	L.LLYHSTMSSKSphosPR.D	-0.852331	-0.241255	1	1	sp|Q14980|NUMA1_HUMAN	STYX	CENTER	1	0.9322	0.986	0.917	KMTMLLLYHSTMSSKSPRDWEQFEYKIQAEL
sp|Q15020|SART3_HUMAN_795	K.VFRYSphosTSLEK.H	K.VFRYSphosTSLEK.H	-0.852331	0.495711	1	1	sp|Q15020|SART3_HUMAN	STYX	CENTER	0.9977	0.9883	0.964	0.904	CVDKSKNPDFKVFRYSTSLEKHKLFISGLPF
sp|Q6UWZ7|ABRX1_HUMAN_406	K.GFGEYSRSphosPTF.-	K.GFGEYSRSphosPTF.-	-0.852331	0.244172	7	9	sp|Q6UWZ7|ABRX1_HUMAN	STYX	CENTER	1	1	0.979	0.982	DEEIEKMKGFGEYSRSPTF____________
sp|Q6WKZ4|RFIP1_HUMAN_434 435_C	R.R(SS)phosLLSLM.T	R.(SS)phosLLSLMTGK.K	-0.852331	-0.118398	15	12	sp|Q6WKZ4|RFIP1_HUMAN	STYX	CENTER	0.9998	1	0.996	0.999	ATKEAKESKKPESRRSSLLSLMTGKKDVAKG TKEAKESKKPESRRSSLLSLMTGKKDVAKGS
sp|Q6WKZ4|RFIP1_HUMAN_435	R.RSSphosLLSLM.T	R.RSSphosLLSLMTGKK.D	-0.852331	-0.118398	35	33	sp|Q6WKZ4|RFIP1_HUMAN	STYX	CENTER	1	1	0.994	0.989	TKEAKESKKPESRRSSLLSLMTGKKDVAKGS
sp|Q8N6H7|ARFG2_HUMAN_432 433_C	K.AI(SS)phosDMFFGR.E	K.AI(SS)phosDMFFGR.E	-0.852331	-0.148146	9	3	sp|Q8N6H7|ARFG2_HUMAN	STYX	CENTER	0.9995	0.9997	1	1	ESSEARQKFAGAKAISSDMFFGREVDAEYEA SSEARQKFAGAKAISSDMFFGREVDAEYEAR
sp|Q8NHV4|NEDD1_HUMAN_493	K.IYMGKQESphosKDSFK.Q	K.IYMGKQESphosKDSFK.Q	-0.852331	-0.273677	1	1	sp|Q8NHV4|NEDD1_HUMAN	STYX	CENTER	0.932	0.9957	0.989	0.992	DLTAESKKIYMGKQESKDSFKQLAKLVTSGA
sp|Q96IZ7|RSRC1_HUMAN_6	R.RSSphosDTEEESR.S	R.RSSphosDTEEESR.S	-0.852331	-0.0499471	10	4	sp|Q96IZ7|RSRC1_HUMAN	STYX	CENTER	0.9998	0.9999	0.983	0.982	__________MGRRSSDTEEESRSKRKKKHR
sp|Q96T37|RBM15_HUMAN_210	K.ISHLSGSphosGSGDER.V	K.ISHLSGSphosGSGDER.V	-0.852331	-0.504289	3	3	sp|Q96T37|RBM15_HUMAN	STYX	CENTER	0.9989	0.9999	0.497	0.498	KRFGDVSVKISHLSGSGSGDERVAFVNFRRP
sp|Q99961|SH3G1_HUMAN_286 287 288_C	K.IAA(SSS)phosFR.S	K.IAA(SSS)phosFR.S	-0.852331	0.338344	5	6	sp|Q99961|SH3G1_HUMAN	STYX	CENTER	0.9989	0.9982	0.999	1	SNGGFPCTTAPKIAASSSFRSSDKPIRTPSR NGGFPCTTAPKIAASSSFRSSDKPIRTPSRS GGFPCTTAPKIAASSSFRSSDKPIRTPSRSM
sp|Q9C0E2|XPO4_HUMAN_521	R.HQQQLLASphosPGSSTVDNK.M	R.HQQQLLASphosPGSSTVDNK.M	-0.852331	0.426763	16	23	sp|Q9C0E2|XPO4_HUMAN	STYX	CENTER	1	1	0.997	0.996	RLHGQLQRHQQQLLASPGSSTVDNKMLDDLY
sp|Q9H4G0|E41L1_HUMAN_75	K.DYSEADGLSphosER.T	K.DYSEADGLSphosER.T	-0.852331	-0.475751	1	2	sp|Q9H4G0|E41L1_HUMAN	STYX	CENTER	0.9976	0.9998	0.871	0.998	SLDMEEKDYSEADGLSERTTPSKAQKSPQKI
sp|Q9H8W4|PKHF2_HUMAN_226	R.SDSphosYSQSLK.S	R.SDSphosYSQSLK.S	-0.852331	0.0546615	3	6	sp|Q9H8W4|PKHF2_HUMAN	STYX	CENTER	0.9995	0.9999	0.988	0.99	LSAGDMATCQPARSDSYSQSLKSPLNDMSDD
sp|Q9P2M7|CING_HUMAN_332	R.KVSphosLVLEK.M	R.KVSphosLVLEK.M	-0.852331	-0.125797	3	4	sp|Q9P2M7|CING_HUMAN	STYX	CENTER	0.9993	0.9999	1	1	REGSSESETSVRRKVSLVLEKMQPLVMVSSG
sp|Q9UQ35|SRRM2_HUMAN_1986 1987_C	R.SR(TS)phosPVTR.R	R.SR(TS)phosPVTR.R	-0.852331	0.0530051	7	4	sp|Q9UQ35|SRRM2_HUMAN	STYX	CENTER	0.9732	0.9877	0.989	0.989	RSRTSPITRRRSRSRTSPVTRRRSRSRTSPV SRTSPITRRRSRSRTSPVTRRRSRSRTSPVT
sp|Q9Y6X9|MORC2_HUMAN_703	K.TASRPAPLVQQLSPSLLPNSphosKSPR.E	K.TASRPAPLVQQLSPSLLPNSphosKSPR.E	-0.852331	0.426763	3	2	sp|Q9Y6X9|MORC2_HUMAN	STYX	CENTER	1	1	0.928	0.631	PAPLVQQLSPSLLPNSKSPREVPSPKVIKTP
tr|H0Y337|H0Y337_HUMAN_211	R.LGYLPVQTVLEGDNLETPSphosQSPQLFHDDTHSR.L	R.LGYLPVQTVLEGDNLETPSphosQSPQLFHDDTHSR.L	-0.852331	-0.225314	1	3	tr|H0Y337|H0Y337_HUMAN	STYQ	CENTER	0.9926	0.9987	0.489	0.933	LPVQTVLEGDNLETPSQSPQLFHDDTHSRIE
sp|Q9UKV3|ACINU_HUMAN_363 364 365_C	K.(TTS)phosPLEEEEREIK.S	K.(TTS)phosPLEEEER.E	-0.851831	-0.103752	2	1	sp|Q9UKV3|ACINU_HUMAN	STYX	CENTER	0.9983	0.9994	1	0.999	RKSHLARQQQEKEMKTTSPLEEEEREIKSSQ KSHLARQQQEKEMKTTSPLEEEEREIKSSQG SHLARQQQEKEMKTTSPLEEEEREIKSSQGL
sp|Q08357|S20A2_HUMAN_422	K.LVGDTVSphosYSK.K	K.LVGDTVSphosYSK.K	-0.848097	0.543016	4	1	sp|Q08357|S20A2_HUMAN	STYX	Q1	0.9976	0.9998	0.922	0.937	SSAPEDSEKLVGDTVSYSKKRLRYDSYSSYC
sp|Q15233|NONO_HUMAN_147	R.FACHSphosASLTVR.N	R.FACHSphosASLTVR.N	-0.846609	1.29148	16	6	sp|Q15233|NONO_HUMAN	STYX	Q1	1	1	0.996	0.991	MPLRGKQLRVRFACHSASLTVRNLPQYVSNE
sp|Q9Y608|LRRF2_HUMAN_312	R.NSphosASATTPLSGNSSR.R	R.NSphosASATTPLSGNSSR.R	-0.846609	0.0453245	2	4	sp|Q9Y608|LRRF2_HUMAN	STYX	CENTER	1	1	0.595	0.998	DKQYAENYTRPSSRNSASATTPLSGNSSRRG
sp|Q12929|EPS8_HUMAN_574	R.NASphosGDSGFVPNNILDIVRPPESGLGR.A	R.NASphosGDSGFVPNNILDIVRPPESGLGR.A	-0.844382	0.142768	4	2	sp|Q12929|EPS8_HUMAN	STYX	CENTER	1	1	0.997	0.997	EILDDRKQWWKVRNASGDSGFVPNNILDIVR
sp|O60658|PDE8A_HUMAN_457	R.RLSphosGNEYVLSTK.N	R.RLSphosGNEYVLSTK.N	-0.843641	0.0391326	4	8	sp|O60658|PDE8A_HUMAN	STYX	CENTER	1	1	0.994	0.998	NDLVGGLMSDGLRRLSGNEYVLSTKNTQMVS
sp|Q8ND76|CCNY_HUMAN_98 99 100_C	K.(YSS)phosCSTIFLDDSTVSQPNLK.Y	K.(YSS)phosCSTIFLDDSTVSQPNLK.Y	-0.843641	0.0934263	4	10	sp|Q8ND76|CCNY_HUMAN	STYX	CENTER	0.9965	0.9938	0.501	0.984	SLFINHHPPGQIARKYSSCSTIFLDDSTVSQ LFINHHPPGQIARKYSSCSTIFLDDSTVSQP FINHHPPGQIARKYSSCSTIFLDDSTVSQPN
sp|Q9NZ63|TLS1_HUMAN_147	K.NAEDCLYphosELPENIR.V	K.NAEDCLYphosELPENIR.V	-0.842901	1.14341	4	7	sp|Q9NZ63|TLS1_HUMAN	STYX	Q1	1	1	1	1	HEEQKVKPKNAEDCLYELPENIRVSSAKKTE
sp|O14776|TCRG1_HUMAN_832 833 834_C	K.AVD(SSS)phosMREDLFK.Q	K.AVD(SSS)phosMREDLFK.Q	-0.842901	-1.03294	2	2	sp|O14776|TCRG1_HUMAN	STYX	Q4	0.9968	0.9982	1	1.001	VKDKVESDPRYKAVDSSSMREDLFKQYIEKI KDKVESDPRYKAVDSSSMREDLFKQYIEKIA DKVESDPRYKAVDSSSMREDLFKQYIEKIAK
sp|Q8WYA6|CTBL1_HUMAN_545	K.EYAENIGDGRSphosPEFR.E	K.EYAENIGDGRSphosPEFR.E	-0.842901	-0.543284	14	13	sp|Q8WYA6|CTBL1_HUMAN	STYX	Q4	1	1	0.993	0.998	RHIIKEYAENIGDGRSPEFRENEQKRILGLL
sp|Q969Z0|FAKD4_HUMAN_549	R.DFVAPHLAQPTphosGSQSPPPGSKR.L	R.DFVAPHLAQPTphosGSQSPPPGSKR.L	-0.842901	-0.41118	2	5	sp|Q969Z0|FAKD4_HUMAN	STYX	CENTER	1	1	0.45	0.333	FLPVRDFVAPHLAQPTGSQSPPPGSKRLAFL
sp|Q9NSK0|KLC4_HUMAN_566	R.RSSphosELLVR.K	R.RSSphosELLVR.K	-0.842901	0.476312	2	4	sp|Q9NSK0|KLC4_HUMAN	STYX	CENTER	0.999	0.9996	0.973	0.933	RSGSLGKIRDVLRRSSELLVRKLQGTEPRPS
sp|Q9UQ35|SRRM2_HUMAN_1987	R.SRTSphosPVTR.R	R.SRTSphosPVTR.R	-0.842901	-0.0466076	8	4	sp|Q9UQ35|SRRM2_HUMAN	STYX	CENTER	0.9738	0.9924	0.986	0.979	SRTSPITRRRSRSRTSPVTRRRSRSRTSPVT
sp|Q9BXP5|SRRT_HUMAN_671	K.TFEEKLTphosPLLSVR.E	K.TFEEKLTphosPLLSVR.E	-0.842408	0.650596	2	1	sp|Q9BXP5|SRRT_HUMAN	STYX	Q1	1	0.9219	0.997	0.996	HGEVLEWQKTFEEKLTPLLSVRESLSEEEAQ
sp|Q9UHB7|AFF4_HUMAN_619 620_C	K.(SS)phosPRPTAEK.K	K.(SS)phosPRPTAEK.K	-0.840194	0.116353	2	2	sp|Q9UHB7|AFF4_HUMAN	STYX	CENTER	0.9549	0.9596	0.992	0.98	ATKGSRKPNIKKESKSSPRPTAEKKKYKSTS TKGSRKPNIKKESKSSPRPTAEKKKYKSTSK
sp|Q9BXB5|OSB10_HUMAN_326	K.SHSphosTEQLK.N	K.SHSphosTEQLK.N	-0.839458	3.9003	2	2	sp|Q9BXB5|OSB10_HUMAN	STYX	NR	0.9971	0.9994	0.982	0.923	GASENILGWHGSKSHSTEQLKNGTLGSLPSA
sp|Q92979|NEP1_HUMAN_177	K.VGTSphosFSIPVVSDVR.E	K.VGTSphosFSIPVVSDVR.E	-0.837865	-2.08925	2	1	sp|Q92979|NEP1_HUMAN	STYX	Q4	0.9997	0.9995	0.95	0.977	PVSDHFPVGCMKVGTSFSIPVVSDVRELVPS
tr|I3L2J0|I3L2J0_HUMAN_664	R.HLSphosASTPK.A	R.HLSphosASTPK.A	-0.834568	0.112382	2	1	tr|I3L2J0|I3L2J0_HUMAN	STYX	CENTER	0.9867	0.9936	0.963	0.803	ASPVIQRTAVRSRHLSASTPKAGVLTPPDLG
sp|Q9UQ35|SRRM2_HUMAN_2684	R.KPIDSphosLR.D	R.KPIDSphosLRDSR.S	-0.833959	-0.133195	8	7	sp|Q9UQ35|SRRM2_HUMAN	STYX	CENTER	0.9976	0.9991	1	1	PPGERRSRSPRKPIDSLRDSRSLSYSPVERR
sp|Q16643|DREB_HUMAN_601	K.EGTQASEGYFSQSphosQEEEFAQSEELCAK.A	K.EGTQASEGYFSQSphosQEEEFAQSEELCAK.A	-0.833593	0.311286	16	3	sp|Q16643|DREB_HUMAN	STYQ	CENTER	0.9992	0.9941	0.992	0.98	TQKEGTQASEGYFSQSQEEEFAQSEELCAKA
sp|Q9Y2W1|TR150_HUMAN_562	K.SSFSphosITR.E	K.SSFSphosITR.E	-0.833593	0.0481919	2	4	sp|Q9Y2W1|TR150_HUMAN	STYX	CENTER	0.9927	0.9979	0.99	0.992	KLGAKGDFPTGKSSFSITREAQVNVRMDSFD
sp|P49902|5NTC_HUMAN_510 511_C	R.NR(TS)phosVDFK.D	R.NR(TS)phosVDFK.D	-0.833472	0.80603	3	6	sp|P49902|5NTC_HUMAN	STYX	Q1	0.967	0.9915	1	1	VDINEMESPLATRNRTSVDFKDTDYKRHQLT DINEMESPLATRNRTSVDFKDTDYKRHQLTR
sp|Q15772|SPEG_HUMAN_488	R.SPASphosDLELR.F	R.SPASphosDLELR.F	-0.833472	0.888944	3	1	sp|Q15772|SPEG_HUMAN	STYX	Q1	0.9997	0.9997	0.996	0.996	KAASLDERTRQRSPASDLELRFAQELGRIRR
sp|Q6ZUT9|DEN5B_HUMAN_1076	R.RLSphosITSLTGK.N	R.RLSphosITSLTGK.N	-0.833472	0.645951	1	8	sp|Q6ZUT9|DEN5B_HUMAN	STYX	Q1	0.9969	1	0.988	0.992	RTPPQQKSPTTARRLSITSLTGKNNKPNAGQ
sp|Q7Z6Z7|HUWE1_HUMAN_1368	R.DLSphosMSEEDQMMR.A	R.DLSphosMSEEDQMMR.A	-0.833472	1.12963	8	2	sp|Q7Z6Z7|HUWE1_HUMAN	STYX	Q1	1	1	0.994	0.993	LTHPPPIMGGVVRDLSMSEEDQMMRAIAMSL
sp|Q9NQV6|PRD10_HUMAN_424	R.LEITSENGEKSphosDDGTQDLLHFPTK.E	R.LEITSENGEKSphosDDGTQDLLHFPTK.E	-0.833472	1.20941	8	5	sp|Q9NQV6|PRD10_HUMAN	STYX	Q1	0.995	0.9999	0.994	0.993	PKFIRLEITSENGEKSDDGTQDLLHFPTKEQ
sp|Q9NWB6|ARGL1_HUMAN_94	K.RSSphosLDEK.Q	K.RSSphosLDEK.Q	-0.833472	1.20941	3	1	sp|Q9NWB6|ARGL1_HUMAN	STYX	Q1	0.9935	0.9225	0.963	0.941	PDRIDIFGRTVSKRSSLDEKQKREEEEKKAE
sp|P28290|ITPI2_HUMAN_425	K.LDSDFNISSphosHSELENSSELK.S	K.LDSDFNISSphosHSELENSSELK.S	-0.833472	-0.624584	1	3	sp|P28290|ITPI2_HUMAN	STYX	Q4	0.9865	0.9981	0.985	0.939	SGIVESKLDSDFNISSHSELENSSELKSVHI
sp|P46013|KI67_HUMAN_1335	R.RPQTphosPKEEAQALEDLTGFK.E	R.RPQTphosPKEEAQALEDLTGFK.E	-0.833472	-0.583361	5	2	sp|P46013|KI67_HUMAN	STYX	Q4	1	1	1	0.997	LDLTENLTGSKRRPQTPKEEAQALEDLTGFK
sp|Q13283|G3BP1_HUMAN_253	R.TFSWASphosVTSK.N	R.TFSWASphosVTSK.N	-0.833472	-0.978221	1	2	sp|Q13283|G3BP1_HUMAN	STYX	Q4	0.9979	0.9991	0.955	0.993	IAQTVQEDLRTFSWASVTSKNLPPSGAVPVT
sp|P49006|MRP_HUMAN_104	K.LSGLSphosFK.R	K.LSGLSphosFKR.N	-0.833472	-3.40258	3	2	sp|P49006|MRP_HUMAN	STYX	NR	0.9993	0.9983	0.997	0.997	KKKFSFKKPFKLSGLSFKRNRKEGGGDSSAS
sp|Q8N5P1|ZC3H8_HUMAN_165	R.NSGSphosQEEDGKPK.E	R.NSGSphosQEEDGKPK.E	-0.833472	6.55075	3	1	sp|Q8N5P1|ZC3H8_HUMAN	STYQ	NR	1	0.998	0.997	0.965	GPGNKGSNALLRNSGSQEEDGKPKEKQQHLS
sp|O43474|KLF4_HUMAN_315 316_C	R.(TT)phosPTLGLEEVLSSR.D	R.(TT)phosPTLGLEEVLSSR.D	-0.833472	0.300609	13	4	sp|O43474|KLF4_HUMAN	STYX	CENTER	1	1	0.998	0.998	PAAHDFPLGRQLPSRTTPTLGLEEVLSSRDC AAHDFPLGRQLPSRTTPTLGLEEVLSSRDCH
sp|O60231|DHX16_HUMAN_106	R.LLEDSEESphosSEETVSR.A	R.LLEDSEESphosSEETVSR.A	-0.833472	0.232676	5	1	sp|O60231|DHX16_HUMAN	STYX	CENTER	0.9986	0.9841	0.988	0.984	LEKNRSYRLLEDSEESSEETVSRAGSSLQKK
sp|O60716|CTND1_HUMAN_352	R.GSLASLDSphosLR.K	R.GSLASLDSphosLRK.G	-0.833472	0.0997818	9	5	sp|O60716|CTND1_HUMAN	STYX	CENTER	0.9999	0.9998	0.994	0.97	APLAQHERGSLASLDSLRKGGPPPPNWRQPE
sp|O95297|MPZL1_HUMAN_221	R.KSPSphosDTEGLVK.S	R.KSPSphosDTEGLVK.S	-0.833472	-0.273677	3	7	sp|O95297|MPZL1_HUMAN	STYX	CENTER	0.9975	0.9999	0.982	0.986	SESLSPVKQAPRKSPSDTEGLVKSLPSGSHQ
sp|P05787|K2C8_HUMAN_274	R.SphosRAEAESMYQIK.Y	R.SphosRAEAESMYQIK.Y	-0.833472	-0.447706	7	9	sp|P05787|K2C8_HUMAN	STYX	CENTER	0.9999	1	0.998	0.998	IIAEVKAQYEDIANRSRAEAESMYQIKYEEL
sp|P0C860|MS3L2_HUMAN_323 324 325 327_C	R.(SSS)phosPTphosLTPSQEGSPVFAGFEGR.R	R.(SSS)phosPTphosLTPSQEGSPVFAGFEGR.R	-0.833472	-0.225314	1	1	sp|P0C860|MS3L2_HUMAN	STYX	CENTER	0.9866	0.9764	0.575	0.476	KLFLHLEKKTPVHSRSSSPTLTPSQEGSPVF LFLHLEKKTPVHSRSSSPTLTPSQEGSPVFA FLHLEKKTPVHSRSSSPTLTPSQEGSPVFAG HLEKKTPVHSRSSSPTLTPSQEGSPVFAGFE
sp|P12270|TPR_HUMAN_379	K.GAILSEEELAAMSphosPTAAAVAK.L	R.KGAILSEEELAAMSphosPTAAAVAK.L	-0.833472	0.300315	36	37	sp|P12270|TPR_HUMAN	STYX	CENTER	1	1	0.996	0.996	KRKGAILSEEELAAMSPTAAAVAKIVKPGMK
sp|P12694|ODBA_HUMAN_337 338 339_C	R.IGHH(STS)phosDDSSAYR.S	R.IGHH(STS)phosDDSSAYR.S	-0.833472	0.240939	4	2	sp|P12694|ODBA_HUMAN	STYX	CENTER	0.9999	1	1	1	QPFLIEAMTYRIGHHSTSDDSSAYRSVDEVN PFLIEAMTYRIGHHSTSDDSSAYRSVDEVNY FLIEAMTYRIGHHSTSDDSSAYRSVDEVNYW
sp|P40425|PBX2_HUMAN_395	R.HSMGPGGYGDNLGGGQMYSphosPR.E	R.HSMGPGGYGDNLGGGQMYSphosPR.E	-0.833472	0.490885	3	8	sp|P40425|PBX2_HUMAN	STYX	CENTER	1	1	0.981	0.987	GPGGYGDNLGGGQMYSPREMRANGSWQEAVT
sp|P52272|HNRPM_HUMAN_513	R.MGSphosGVER.M	R.MGSphosGVER.M	-0.833472	0.294787	8	4	sp|P52272|HNRPM_HUMAN	STYX	CENTER	0.9926	0.9928	1	1	AAPIDRVGQTIERMGSGVERMGPAIERMGLS
sp|P52272|HNRPM_HUMAN_618	R.MGLAMGGGGGASphosFDR.A	R.MGLAMGGGGGASphosFDR.A	-0.833472	-0.209546	54	18	sp|P52272|HNRPM_HUMAN	STYX	CENTER	1	1	1	1	GIERMGLAMGGGGGASFDRAIEMERGNFGGS
sp|Q08170|SRSF4_HUMAN_431	R.GESphosENAGTNQETR.S	R.EGRGESphosENAGTNQETR.S	-0.833472	0.232676	17	13	sp|Q08170|SRSF4_HUMAN	STYX	CENTER	1	1	0.998	0.998	EHAKSESSQREGRGESENAGTNQETRSRSRS
sp|Q12959|DLG1_HUMAN_578 579_C	R.EQMMNSSISSGSGSLR(TS)phosQK.R	R.EQMMNSSISSGSGSLR(TS)phosQK.R	-0.833472	-0.209546	6	2	sp|Q12959|DLG1_HUMAN	STYQ	CENTER	0.9922	0.9946	0.968	0.966	QMMNSSISSGSGSLRTSQKRSLYVRALFDYD MMNSSISSGSGSLRTSQKRSLYVRALFDYDK
sp|Q13425|SNTB2_HUMAN_129	K.QEAGGLGISphosIK.G	K.QEAGGLGISphosIK.G	-0.833472	-0.217602	3	2	sp|Q13425|SNTB2_HUMAN	STYX	CENTER	0.9949	0.9999	1	1	RRVRVVKQEAGGLGISIKGGRENRMPILISK
sp|Q13435|SF3B2_HUMAN_343	R.GVSphosSESSGDREK.D	R.GVSphosSESSGDREK.D	-0.833472	0.426763	5	15	sp|Q13435|SF3B2_HUMAN	STYX	CENTER	0.9995	1	0.996	0.996	RNRKKKKKPQRVRGVSSESSGDREKDSTRSR
sp|Q15149|PLEC_HUMAN_4030	K.QITphosMEELVR.S	R.KQITphosMEELVR.S	-0.833472	-0.0606828	30	31	sp|Q15149|PLEC_HUMAN	STYX	CENTER	1	1	1	1	SDARKLTFRGLRKQITMEELVRSQVMDEATA
sp|Q15424|SAFB1_HUMAN_24	A.ALSSASSphosETGTR.R	A.ALSSASSphosETGTR.R	-0.833472	0.300315	1	1	sp|Q15424|SAFB1_HUMAN	STYX	CENTER	0.9426	0.9687	0.941	0.938	GDSGAAGAAALSSASSETGTRRLSDLRVIDL
sp|Q2KHR3|QSER1_HUMAN_615	R.SNSphosRLEDQVIGVALQASK.K	R.SNSphosRLEDQVIGVALQASK.K	-0.833472	0.332981	3	16	sp|Q2KHR3|QSER1_HUMAN	STYX	CENTER	1	1	0.976	0.94	SKADDRYSQSVIRSNSRLEDQVIGVALQASK
sp|Q5SW79|CE170_HUMAN_664	K.VVTphosQRSEIGEKQDTELQEK.E	K.VVTphosQRSEIGEKQDTELQEK.E	-0.833472	-0.163253	1	1	sp|Q5SW79|CE170_HUMAN	STYQ	CENTER	1	1	0.535	0.843	PNEEKSLESHRAKVVTQRSEIGEKQDTELQE
sp|Q5VT52|RPRD2_HUMAN_663 664 665_C	K.LESE(STS)phosPSLEMK.L	K.LESE(STS)phosPSLEMK.L	-0.833472	0.0861664	6	4	sp|Q5VT52|RPRD2_HUMAN	STYX	CENTER	0.9987	0.9986	0.994	0.998	ICQSSEVSKPKLESESTSPSLEMKIHNFLKG CQSSEVSKPKLESESTSPSLEMKIHNFLKGN QSSEVSKPKLESESTSPSLEMKIHNFLKGNP
sp|Q6AI12|ANR40_HUMAN_364	R.RASphosKLTY.-	R.RASphosKLTY.-	-0.833472	0.244172	2	1	sp|Q6AI12|ANR40_HUMAN	STYX	CENTER	0.9769	0.9918	0.968	0.977	AASTLTERPCYNRRASKLTY___________
sp|Q6IN85|P4R3A_HUMAN_737	K.TNLSphosGRQSPSFK.L	K.TNLSphosGRQSPSFK.L	-0.833472	0.149535	3	3	sp|Q6IN85|P4R3A_HUMAN	STYX	CENTER	0.9968	0.9985	0.545	0.866	LKESEEKEVLLKTNLSGRQSPSFKLSLSSGT
sp|Q76I76|SSH2_HUMAN_899	R.KNSphosKNDSSVADLAPK.G	R.KNSphosKNDSSVADLAPK.G	-0.833472	-0.0466076	3	1	sp|Q76I76|SSH2_HUMAN	STYX	CENTER	1	0.9991	0.994	0.826	HGAAPTCTSLSTRKNSKNDSSVADLAPKGKS
sp|Q76L83|ASXL2_HUMAN_845	S.GASphosPVHCAADGTVELK.A	K.APSPTGPALISGASphosPVHCAADGTVELK.A	-0.833472	-0.133272	1	2	sp|Q76L83|ASXL2_HUMAN	STYX	CENTER	0.9936	0.9989	0.998	0.943	EKAPSPTGPALISGASPVHCAADGTVELKAG
sp|Q86V48|LUZP1_HUMAN_702 703_C	R.(TS)phosLFENDKDAGMENESVK.S	R.(TS)phosLFENDKDAGMENESVK.S	-0.833472	-0.0188626	3	8	sp|Q86V48|LUZP1_HUMAN	STYX	CENTER	1	1	1	1	QPNSREKAKTRGAPRTSLFENDKDAGMENES PNSREKAKTRGAPRTSLFENDKDAGMENESV
sp|Q86YV5|PRAG1_HUMAN_413	R.EATQPEPIYphosAESTKR.K	R.EATQPEPIYphosAESTK.R	-0.833472	0.0350762	3	15	sp|Q86YV5|PRAG1_HUMAN	STYX	CENTER	0.999	1	0.996	0.997	QPPAHPREATQPEPIYAESTKRKKAAPVPSK
sp|Q8ND56|LS14A_HUMAN_178	K.TQLSphosQGR.S	K.TQLSphosQGR.S	-0.833472	0.266892	3	3	sp|Q8ND56|LS14A_HUMAN	STYQ	CENTER	0.9914	0.9753	0.993	0.995	GSAFTQDTRSLKTQLSQGRSSPQLDPLRKSP
sp|Q8ND76|CCNY_HUMAN_100	K.YSSphosCSTIFLDDSTVSQPNLK.Y	K.YSSphosCSTIFLDDSTVSQPNLK.Y	-0.833472	-0.104562	1	2	sp|Q8ND76|CCNY_HUMAN	STYX	CENTER	0.9886	0.999	0.962	0.989	FINHHPPGQIARKYSSCSTIFLDDSTVSQPN
sp|Q8NDI1|EHBP1_HUMAN_710	K.DMSphosPPFICEETDEQK.L	K.DMSphosPPFICEETDEQK.L	-0.833472	0.0350762	1	1	sp|Q8NDI1|EHBP1_HUMAN	STYX	CENTER	0.9995	1	0.991	0.998	LELSDLYVSDKKKDMSPPFICEETDEQKLQT
sp|Q8TAQ2|SMRC2_HUMAN_302 304	R.KRSphosPSphosPSPTPEAK.K	R.KRSphosPSphosPSPTPEAK.K	-0.833472	0.137257	3	3	sp|Q8TAQ2|SMRC2_HUMAN	STYX	CENTER	0.9994	0.9964	0.995	0.962	DRRDKKGGNYKKRKRSPSPSPTPEAKKKNAK RDKKGGNYKKRKRSPSPSPTPEAKKKNAKKG
sp|Q93074|MED12_HUMAN_1258	K.GSGFTVTGGTEELPEEEGGGGSphosGGR.R	K.GSGFTVTGGTEELPEEEGGGGSphosGGRR.Q	-0.833472	-0.0550197	17	10	sp|Q93074|MED12_HUMAN	STYX	CENTER	1	1	0.998	0.998	TGGTEELPEEEGGGGSGGRRQGGRNISVETA
sp|Q96I24|FUBP3_HUMAN_76	R.TphosVITEEFK.V	R.TphosVITEEFKVPDK.M	-0.833472	-0.350051	19	10	sp|Q96I24|FUBP3_HUMAN	STYX	CENTER	1	0.9999	0.997	0.974	DDGVGNQLGALVHQRTVITEEFKVPDKMVGF
sp|Q9H307|PININ_HUMAN_347	K.EIAIVHSphosDAEKEQEEEEQKQEMEVK.M	K.EIAIVHSphosDAEKEQEEEEQKQEMEVK.M	-0.833472	0.0742468	7	16	sp|Q9H307|PININ_HUMAN	STYX	CENTER	1	1	1	1	EEAGEEEEKEIAIVHSDAEKEQEEEEQKQEM
sp|Q9UQ35|SRRM2_HUMAN_2312	R.TPAALAALSLTphosGSGTPPTAANYPSSSR.T	R.TPAALAALSLTphosGSGTPPTAANYPSSSR.T	-0.833472	-0.02775	1	6	sp|Q9UQ35|SRRM2_HUMAN	STYX	CENTER	0.9928	0.9958	0.332	0.963	LAGARTPAALAALSLTGSGTPPTAANYPSSS
sp|Q86U42|PABP2_HUMAN_95	R.APPGAPGPGPGSGAPGSphosQEEEEEPGLVEGDPGDGAIEDPELEAIK.A	R.APPGAPGPGPGSGAPGSphosQEEEEEPGLVEGDPGDGAIEDPELEAIK.A	-0.832864	2.32759	2	13	sp|Q86U42|PABP2_HUMAN	STYQ	Q1	1	1	0.722	0.997	PPGAPGPGPGSGAPGSQEEEEEPGLVEGDPG
sp|Q9UKA4|AKA11_HUMAN_273	K.TSVTTSISphosEPWTQR.S	K.TSVTTSISphosEPWTQR.S	-0.82657	0.0350154	2	4	sp|Q9UKA4|AKA11_HUMAN	STYX	CENTER	0.9982	0.997	0.991	0.984	HKELPSVKTSVTTSISEPWTQRSFYRSSNAS
sp|Q14643|ITPR1_HUMAN_1598	R.RDSphosVLAASR.D	R.RDSphosVLAASR.D	-0.824885	1.06779	2	3	sp|Q14643|ITPR1_HUMAN	STYX	Q1	0.996	0.9998	0.533	0.964	AMNWRLSARNAARRDSVLAASRDYRNIIERL
sp|Q13033|STRN3_HUMAN_202	R.VRSphosLLGLSNSEPNGSVETK.N	R.SphosLLGLSNSEPNGSVETK.N	-0.824885	-0.0188626	4	5	sp|Q13033|STRN3_HUMAN	STYX	CENTER	1	1	0.999	0.999	GYTDTILDVRSQRVRSLLGLSNSEPNGSVET
sp|Q9H2H9|S38A1_HUMAN_49	K.FISDRESphosRR.S	K.FISDRESphosRR.S	-0.824404	-0.170886	2	4	sp|Q9H2H9|S38A1_HUMAN	STYX	CENTER	0.9553	0.9858	0.975	0.992	VENGQINSKFISDRESRRSLTNSHLEKKKCD
sp|Q9NWB6|ARGL1_HUMAN_266	K.SRPKLSphosFSLK.T	K.SRPKLSphosFSLK.T	-0.824404	0.456716	4	3	sp|Q9NWB6|ARGL1_HUMAN	STYX	CENTER	0.9997	0.9996	0.987	0.988	EQKIILGKGKSRPKLSFSLKTQD________
tr|A0A087WZS1|A0A087WZS1_HUMAN_6	R.LGSphosFSNDPSDKPPCR.G	R.LGSphosFSNDPSDKPPCR.G	-0.824164	0.892596	2	8	tr|A0A087WZS1|A0A087WZS1_HUMAN	STYX	Q1	1	1	0.995	0.996	__________MDRLGSFSNDPSDKPPCRGCS
sp|Q8WXH0|SYNE2_HUMAN_2781	R.QQSphosVESLAEEVK.D	R.QQSphosVESLAEEVK.D	-0.824164	0.197629	6	5	sp|Q8WXH0|SYNE2_HUMAN	STYX	CENTER	1	1	0.995	0.995	RKCKVTHDGILARQQSVESLAEEVKDKVPSL
sp|Q5PRF9|SMAG2_HUMAN_238	R.SMSphosLIPTSPQVPGEWPSPEELGAR.A	R.SMSphosLIPTSPQVPGEWPSPEELGAR.A	-0.821287	1.05425	2	6	sp|Q5PRF9|SMAG2_HUMAN	STYX	Q1	1	1	0.952	0.993	GLPCQIHPSPLKRSMSLIPTSPQVPGEWPSP
sp|P50851|LRBA_HUMAN_1231	K.LINDCHGSphosVSEASSEQK.L	K.LINDCHGSphosVSEASSEQK.L	-0.820689	0.238332	4	8	sp|P50851|LRBA_HUMAN	STYX	CENTER	1	1	0.989	0.991	TNLTRETKLINDCHGSVSEASSEQKIAKLDV
sp|O75132|ZBED4_HUMAN_639 640_C	R.GTELSGA(SS)phosFDDTNEK.F	R.GTELSGA(SS)phosFDDTNEKFYDSHPVAK.K	-0.819137	-0.41118	2	1	sp|O75132|ZBED4_HUMAN	STYX	CENTER	0.9977	0.9189	0.993	0.53	SPDTRVPRGTELSGASSFDDTNEKFYDSHPV PDTRVPRGTELSGASSFDDTNEKFYDSHPVA
sp|Q14839|CHD4_HUMAN_1653	K.SAIDLTphosPIVVEDK.E	K.SAIDLTphosPIVVEDKEEK.K	-0.817826	1.1061	16	9	sp|Q14839|CHD4_HUMAN	STYX	Q1	1	1	0.999	0.998	AADVEKVEEKSAIDLTPIVVEDKEEKKEEEE
sp|Q7LDG7|GRP2_HUMAN_393 394_C	K.SSP(TS)phosPTSCTPPPRPPVLEEWTSAAKPK.L	K.SSP(TS)phosPTSCTPPPRPPVLEEWTSAAKPK.L	-0.817588	0.354355	2	1	sp|Q7LDG7|GRP2_HUMAN	STYX	CENTER	0.9792	0.9901	0.862	0.456	YQLSLQREPRSKSSPTSPTSCTPPPRPPVLE QLSLQREPRSKSSPTSPTSCTPPPRPPVLEE
sp|P20340|RAB6A_HUMAN_184	R.VAAALPGMESTQDRSphosREDMIDIK.L	R.VAAALPGMESTQDRSphosREDMIDIK.L	-0.816756	0.124873	2	3	sp|P20340|RAB6A_HUMAN	STYX	CENTER	0.9927	0.9999	0.965	0.864	RVAAALPGMESTQDRSREDMIDIKLEKPQEQ
sp|P46821|MAP1B_HUMAN_1785	K.SDISphosPLTPR.E	K.SDISphosPLTPR.E	-0.81628	0.0505134	2	2	sp|P46821|MAP1B_HUMAN	STYX	CENTER	0.9994	0.9999	0.99	0.994	VQSLEGEKLSPKSDISPLTPRESSPLYSPTF
sp|B1AK53|ESPN_HUMAN_647	K.SFNMMSphosPTGDNSELLAEIK.A	K.SFNMMSphosPTGDNSELLAEIK.A	-0.814975	0.0870143	8	2	sp|B1AK53|ESPN_HUMAN	STYX	CENTER	1	1	0.996	0.996	RSSSSTGSTKSFNMMSPTGDNSELLAEIKAG
sp|Q15149|PLEC_HUMAN_4382	T.EFADMLSGNAGGFRSphosR.S	L.SITEFADMLSGNAGGFRSphosR.S	-0.814975	-0.163253	28	10	sp|Q15149|PLEC_HUMAN	STYX	CENTER	1	1	0.999	0.998	TEFADMLSGNAGGFRSRSSSVGSSSSYPISP
sp|Q6PKG0|LARP1_HUMAN_1040	K.RHSphosVVAGGGGGEGR.K	K.RHSphosVVAGGGGGEGR.K	-0.814975	-0.02775	6	6	sp|Q6PKG0|LARP1_HUMAN	STYX	CENTER	1	1	1	1	RVDPPMGEEGNHKRHSVVAGGGGGEGRKRCP
sp|Q92685|ALG3_HUMAN_13	R.SGSphosAAQAEGLCK.Q	R.SGSphosAAQAEGLCK.Q	-0.814975	0.244172	4	12	sp|Q92685|ALG3_HUMAN	STYX	CENTER	1	1	0.982	0.982	___MAAGLRKRGRSGSAAQAEGLCKQWLQRA
sp|Q9UDT6|CLIP2_HUMAN_352	R.KISphosGTTALQEALK.E	R.KISphosGTTALQEALK.E	-0.814975	0.500121	4	8	sp|Q9UDT6|CLIP2_HUMAN	STYX	CENTER	1	1	0.992	0.991	SGLLTETSSRYARKISGTTALQEALKEKQQH
sp|O94762|RECQ5_HUMAN_815	K.YTGEEDGAGGHSphosPAPPQTEECLR.E	K.YTGEEDGAGGHSphosPAPPQTEECLR.E	-0.814856	0.885235	7	10	sp|O94762|RECQ5_HUMAN	STYX	Q1	1	1	0.999	0.999	APEKYTGEEDGAGGHSPAPPQTEECLRERPS
sp|P27708|PYR1_HUMAN_1406 1407_C	R.RL(SS)phosFVTK.G	R.RL(SS)phosFVTK.G	-0.814856	0.701424	6	8	sp|P27708|PYR1_HUMAN	STYX	Q1	0.9996	0.9998	0.998	1	LVINLSMRGAGGRRLSSFVTKGYRTRRLAAD VINLSMRGAGGRRLSSFVTKGYRTRRLAADF
sp|P29317|EPHA2_HUMAN_587 588_C	K.SEQLKPLK(TY)phosVDPHTYEDPNQAVLK.F	K.(TY)phosVDPHTYEDPNQAVLK.F	-0.814856	1.26407	1	8	sp|P29317|EPHA2_HUMAN	STYX	Q1	0.9998	1	0.998	1	EDVYFSKSEQLKPLKTYVDPHTYEDPNQAVL DVYFSKSEQLKPLKTYVDPHTYEDPNQAVLK
sp|Q12789|TF3C1_HUMAN_667	R.NLSphosEEGLLR.L	R.NLSphosEEGLLR.L	-0.814856	0.641931	5	1	sp|Q12789|TF3C1_HUMAN	STYX	Q1	0.9994	0.9909	1	1	TKCCKKSIVRLVRNLSEEGLLRLYRTTVIQD
sp|P28290|ITPI2_HUMAN_794	R.VMEHDGQSphosLVK.S	R.VMEHDGQSphosLVK.S	-0.814856	-0.978221	4	5	sp|P28290|ITPI2_HUMAN	STYX	Q4	1	0.9999	1	1	EEQELEKRVMEHDGQSLVKSTIFISPSSVKK
sp|Q5VZK9|CARL1_HUMAN_1131	K.TPDSphosFEESQGEEIGKVER.S	R.IEEIKTPDSphosFEESQGEEIGKVER.S	-0.814856	-0.978221	3	3	sp|Q5VZK9|CARL1_HUMAN	STYX	Q4	1	0.9999	0.995	0.946	HNGNSERIEEIKTPDSFEESQGEEIGKVERS
sp|A8K0Z3|WASH1_HUMAN_217	K.LFDAPLSphosISK.R	K.LFDAPLSphosISKR.E	-0.814856	0.0482515	8	7	sp|A8K0Z3|WASH1_HUMAN	STYX	CENTER	1	1	0.994	0.985	MLGAETEEKLFDAPLSISKREQLEQQVPENY
sp|O00273|DFFA_HUMAN_310	R.SISphosASKASPPGDLQNPK.R	R.SISphosASKASPPGDLQNPK.R	-0.814856	0.0565498	1	4	sp|O00273|DFFA_HUMAN	STYX	CENTER	0.9744	0.9998	0.333	0.461	LRLQQTQSLHSLRSISASKASPPGDLQNPKR
sp|O00515|LAD1_HUMAN_19	R.QRTphosLEDEEEQER.E	R.QRTphosLEDEEEQER.E	-0.814856	-0.290165	7	9	sp|O00515|LAD1_HUMAN	STYX	CENTER	1	1	1	1	SRKDWSALSSLARQRTLEDEEEQERERRRRH
sp|O15062|ZBTB5_HUMAN_208	R.LRPSphosIDESAISDVTPENGPSGVHSR.E	R.LRPSphosIDESAISDVTPENGPSGVHSR.E	-0.814856	-0.080291	1	10	sp|O15062|ZBTB5_HUMAN	STYX	CENTER	1	1	0.964	0.998	RKQSAEERARQRLRPSIDESAISDVTPENGP
sp|O43426|SYNJ1_HUMAN_1385 1391 1392_C	R.SQSphosQENMR(SS)phosPNPFITGLTR.T	R.SQSphosQENMR(SS)phosPNPFITGLTR.T	-0.814856	0.204623	5	2	sp|O43426|SYNJ1_HUMAN	STYQ	CENTER	0.988	0.9699	1.306	1.298	VSCMPTMPPIPARSQSQENMRSSPNPFITGL MPPIPARSQSQENMRSSPNPFITGLTRTNPF PPIPARSQSQENMRSSPNPFITGLTRTNPFS
sp|P05787|K2C8_HUMAN_43	R.VGSphosSNFR.G	R.VGSphosSNFR.G	-0.814856	-0.340791	14	1	sp|P05787|K2C8_HUMAN	STYX	CENTER	0.9982	0.9605	0.978	0.905	GPGSRISSSSFSRVGSSNFRGGLGGGYGGAS
sp|P06241|FYN_HUMAN_21	R.DGSphosLNQSSGYR.Y	R.DGSphosLNQSSGYR.Y	-0.814856	-0.449605	1	2	sp|P06241|FYN_HUMAN	STYX	CENTER	0.9988	0.9958	0.997	0.97	CKDKEATKLTEERDGSLNQSSGYRYGTDPTP
sp|P08727|K1C19_HUMAN_10	R.QSSphosATSSFGGLGGGSVR.F	R.QSSphosATSSFGGLGGGSVR.F	-0.814856	-0.494735	7	6	sp|P08727|K1C19_HUMAN	STYX	CENTER	0.9986	0.9989	0.995	0.994	______MTSYSYRQSSATSSFGGLGGGSVRF
sp|P15822|ZEP1_HUMAN_186 187 188_C	R.TDNSECISSHCG(TTS)phosPSYTNTAFDVLLK.A	R.TDNSECISSHCG(TTS)phosPSYTNTAFDVLLK.A	-0.814856	0.354355	3	1	sp|P15822|ZEP1_HUMAN	STYX	CENTER	0.9954	0.9877	0.998	0.48	KTRTDNSECISSHCGTTSPSYTNTAFDVLLK TRTDNSECISSHCGTTSPSYTNTAFDVLLKA RTDNSECISSHCGTTSPSYTNTAFDVLLKAM
sp|P16144|ITB4_HUMAN_1501	R.SEHSphosHSTTLPR.D	R.SEHSphosHSTTLPR.D	-0.814856	0.136413	1	4	sp|P16144|ITB4_HUMAN	STYX	CENTER	0.9933	0.9997	0.434	0.964	STLTRDYNSLTRSEHSHSTTLPRDYSTLTSV
sp|P19447|ERCC3_HUMAN_685 686_C	R.FLVDQG(YS)phosFK.V	R.FLVDQG(YS)phosFK.V	-0.814856	-0.166216	3	2	sp|P19447|ERCC3_HUMAN	STYX	CENTER	0.9996	0.9952	1	1	MAYSTKRQRFLVDQGYSFKVITKLAGMEEED AYSTKRQRFLVDQGYSFKVITKLAGMEEEDL
sp|P24928|RPB1_HUMAN_1863 1864_C	K.YSP(TS)phosPK.Y	K.YSP(TS)phosPK.Y	-0.814856	0.561513	9	7	sp|P24928|RPB1_HUMAN	STYX	CENTER	0.9991	0.9994	0.998	0.998	PSSPEYTPTSPKYSPTSPKYSPTSPKYSPTS SSPEYTPTSPKYSPTSPKYSPTSPKYSPTSP
sp|P27708|PYR1_HUMAN_1406	R.RLSphosSFVTK.G	R.RLSphosSFVTK.G	-0.814856	0.456716	1	1	sp|P27708|PYR1_HUMAN	STYX	CENTER	0.9993	0.9929	0.961	0.901	LVINLSMRGAGGRRLSSFVTKGYRTRRLAAD
sp|P35222|CTNB1_HUMAN_551 552_C	R.(TS)phosMGGTQQQFVEGVR.M	R.(TS)phosMGGTQQQFVEGVR.M	-0.814856	0.131065	15	30	sp|P35222|CTNB1_HUMAN	STYX	CENTER	1	1	1	1	LVQLLVRAHQDTQRRTSMGGTQQQFVEGVRM VQLLVRAHQDTQRRTSMGGTQQQFVEGVRME
sp|P36551|HEM6_HUMAN_409	K.FGLFTphosPGSR.L	K.FGLFTphosPGSR.L	-0.814856	-0.188052	6	2	sp|P36551|HEM6_HUMAN	STYX	CENTER	0.9997	0.9994	0.996	0.993	EFNLLYDRGTKFGLFTPGSRIESILMSLPLT
sp|P49006|MRP_HUMAN_36	K.ANGQENGHVKSphosNGDLSPK.G	K.SphosNGDLSPK.G	-0.814856	-0.089252	2	1	sp|P49006|MRP_HUMAN	STYX	CENTER	1	0.9992	0.995	0.959	ASPAKANGQENGHVKSNGDLSPKGEGESPPV
sp|P52948|NUP98_HUMAN_1043	K.TRSphosLVGGLL.Q	R.SphosLVGGLLQSK.F	-0.814856	-0.039638	17	8	sp|P52948|NUP98_HUMAN	STYX	CENTER	0.9999	1	0.994	0.99	SPRLPISASHSSKTRSLVGGLLQSKFTSGAF
sp|P55197|AF10_HUMAN_436	K.SFENSphosPGDLGNSSLPTAGYKR.A	K.SFENSphosPGDLGNSSLPTAGYK.R	-0.814856	-0.485181	1	1	sp|P55197|AF10_HUMAN	STYX	CENTER	0.9999	0.9984	0.974	0.998	PSTSAVTSQPKSFENSPGDLGNSSLPTAGYK
sp|Q01650|LAT1_HUMAN_35	K.SADGSphosAPAGEGEGVTLQR.N	K.SADGSphosAPAGEGEGVTLQR.N	-0.814856	-0.249495	1	6	sp|Q01650|LAT1_HUMAN	STYX	CENTER	1	1	0.997	0.997	EEAREKMLAAKSADGSAPAGEGEGVTLQRNI
sp|Q01804|OTUD4_HUMAN_439	R.ESNYphosFGLSPEERR.E	R.ESNYphosFGLSPEER.R	-0.814856	-0.485181	1	1	sp|Q01804|OTUD4_HUMAN	STYX	CENTER	0.9965	0.9999	0.816	0.496	RERVEDFDHTSRESNYFGLSPEERREKQAIE
sp|Q12789|TF3C1_HUMAN_844 845 846_C	R.AGVRP(SSS)phosGSAWEAC.S	R.AGVRP(SSS)phosGSAWEACSEAPSK.G	-0.814856	0.128509	3	2	sp|Q12789|TF3C1_HUMAN	STYX	CENTER	1	1	0.996	0.984	RRTIKQESGRAGVRPSSSGSAWEACSEAPSK RTIKQESGRAGVRPSSSGSAWEACSEAPSKG TIKQESGRAGVRPSSSGSAWEACSEAPSKGS
sp|Q13435|SF3B2_HUMAN_302 303_C	R.(SS)phosLGQSASETEEDTVSVSK.K	R.(SS)phosLGQSASETEEDTVSVSK.K	-0.814856	0.44174	5	6	sp|Q13435|SF3B2_HUMAN	STYX	CENTER	0.9979	0.9987	0.998	1	MNSQQEEEEMETDARSSLGQSASETEEDTVS NSQQEEEEMETDARSSLGQSASETEEDTVSV
sp|Q5VWG9|TAF3_HUMAN_199	R.LLSphosTKGDTLDVVLLEAR.E	R.LLSphosTKGDTLDVVLLEAR.E	-0.814856	0.385833	2	1	sp|Q5VWG9|TAF3_HUMAN	STYX	CENTER	1	1	0.989	0.988	PEAEELPAMKRPRLLSTKGDTLDVVLLEARE
sp|Q6P6B1|ERIC5_HUMAN_142	K.DAGAGTEAESphosLKGNAEAQPLGPEAK.G	K.DAGAGTEAESphosLKGNAEAQPLGPEAK.G	-0.814856	0.105972	1	2	sp|Q6P6B1|ERIC5_HUMAN	STYX	CENTER	0.9955	1	0.949	0.981	AEGKKKDAGAGTEAESLKGNAEAQPLGPEAK
sp|Q7Z3J3|RGPD4_HUMAN_731	K.ILDDSDSNLSphosVVK.K	K.ILDDSDSNLSphosVVK.K	-0.814856	0.112382	1	1	sp|Q7Z3J3|RGPD4_HUMAN	STYX	CENTER	0.9997	0.9817	0.979	0.44	RGYLIKILDDSDSNLSVVKKLPVPLESVKEM
sp|Q7Z589|EMSY_HUMAN_1136	K.LTSPVTSISphosPIQASEK.T	K.LTSPVTSISphosPIQASEK.T	-0.814856	-0.00518771	6	5	sp|Q7Z589|EMSY_HUMAN	STYX	CENTER	0.999	0.9986	0.993	0.993	GGSSVPKLTSPVTSISPIQASEKTAVSDILK
sp|Q7Z5J4|RAI1_HUMAN_470	K.NLVSphosRTPEQHK.S	K.NLVSphosRTPEQHK.S	-0.814856	0.166533	1	2	sp|Q7Z5J4|RAI1_HUMAN	STYX	CENTER	0.9949	0.9767	0.5	0.815	SKAAVPQKKGVKNLVSRTPEQHKSQHCSPEG
sp|Q8IYH5|ZZZ3_HUMAN_89 90 91_C	R.GL(SSS)phosEKDNIER.Q	R.GL(SSS)phosEKDNIER.Q	-0.814856	-0.133195	3	6	sp|Q8IYH5|ZZZ3_HUMAN	STYX	CENTER	0.9993	0.9999	1	1.001	QSTRESWVSPRKRGLSSSEKDNIERQAIENC STRESWVSPRKRGLSSSEKDNIERQAIENCE TRESWVSPRKRGLSSSEKDNIERQAIENCER
sp|Q8N9T8|KRI1_HUMAN_136	K.YVDEENSphosDGETSNHR.L	K.YVDEENSphosDGETSNHR.L	-0.814856	0.538287	21	4	sp|Q8N9T8|KRI1_HUMAN	STYX	CENTER	1	1	0.998	0.997	KVILEKAGKYVDEENSDGETSNHRLQETSSQ
sp|Q8NDT2|RB15B_HUMAN_562	R.RNSphosLEGYSR.S	R.RNSphosLEGYSR.S	-0.814856	0.232676	11	26	sp|Q8NDT2|RB15B_HUMAN	STYX	CENTER	0.9998	1	0.997	0.998	EGDWTSPSKSSDRRNSLEGYSRSVRSRSGER
sp|Q8NF99|ZN397_HUMAN_236	K.LRSphosPSQGGSFSQVIFTNK.S	K.LRSphosPSQGGSFSQVIFTNK.S	-0.814856	-0.163253	1	3	sp|Q8NF99|ZN397_HUMAN	STYX	CENTER	0.9926	1	0.99	0.972	NLVWKQGSATGEKLRSPSQGGSFSQVIFTNK
sp|Q8NFC6|BD1L1_HUMAN_1703	R.AGSISphosSEEVDGSQGNMMR.M	R.AGSISphosSEEVDGSQGNMMR.M	-0.814856	-0.0748967	4	5	sp|Q8NFC6|BD1L1_HUMAN	STYX	CENTER	1	1	0.982	0.993	GAVTSAGTEIRAGSISSEEVDGSQGNMMRMG
sp|Q8TF01|PNISR_HUMAN_563	R.SRSphosPTIK.A	R.SRSphosPTIK.A	-0.814856	0.0742468	3	3	sp|Q8TF01|PNISR_HUMAN	STYX	CENTER	0.9632	0.9831	0.956	0.977	RSSSPKRKKRHSRSRSPTIKARRSRSRSYSR
sp|Q9BRD0|BUD13_HUMAN_159	R.HDTphosPDPSPLR.G	R.HDTphosPDPSPLR.G	-0.814856	0.191594	11	14	sp|Q9BRD0|BUD13_HUMAN	STYX	CENTER	0.9998	1	0.998	0.997	RHDTPDPSPRRARHDTPDPSPLRGARHDSDT
sp|Q9BRQ6|MIC25_HUMAN_13	R.RVSphosFGVDEEER.V	R.RVSphosFGVDEEER.V	-0.814856	0.238424	7	6	sp|Q9BRQ6|MIC25_HUMAN	STYX	CENTER	1	1	1	1	___MGSTESSEGRRVSFGVDEEERVRVLQGV
sp|Q9C0C2|TB182_HUMAN_1158	K.TTAGSphosVDWTDQLGLR.N	K.TTAGSphosVDWTDQLGLR.N	-0.814856	-0.133886	3	6	sp|Q9C0C2|TB182_HUMAN	STYX	CENTER	1	1	0.994	0.995	MEGGHFVPPGKTTAGSVDWTDQLGLRNLEVS
sp|Q9C0J8|WDR33_HUMAN_1279	R.SSSphosLDGEHHDGYHR.D	R.SSSphosLDGEHHDGYHR.D	-0.814856	0.169613	5	2	sp|Q9C0J8|WDR33_HUMAN	STYX	CENTER	1	1	0.99	0.979	GPGPAQRVPKSGRSSSLDGEHHDGYHRDEPF
sp|Q9P265|DIP2B_HUMAN_200 201_C	K.G(TS)phosGSLADVFANTR.L	K.G(TS)phosGSLADVFANTR.L	-0.814856	0.209406	1	6	sp|Q9P265|DIP2B_HUMAN	STYX	CENTER	0.9999	1	0.501	0.872	SSSASSTLSHGEVKGTSGSLADVFANTRIEN SSASSTLSHGEVKGTSGSLADVFANTRIENF
sp|Q9UKV3|ACINU_HUMAN_689 690 691 692 693 694 703_C	R.(TSTSSSS)phosVQAR.R	R.(TSTSSSS)phosVQAR.R	-0.814856	-0.492208	3	4	sp|Q9UKV3|ACINU_HUMAN	STYX	CENTER	0.9808	0.9965	1.001	1	PSSGQEVATPPVPQLQVCEPKERTSTSSSSV SSGQEVATPPVPQLQVCEPKERTSTSSSSVQ SGQEVATPPVPQLQVCEPKERTSTSSSSVQA GQEVATPPVPQLQVCEPKERTSTSSSSVQAR QEVATPPVPQLQVCEPKERTSTSSSSVQARR EVATPPVPQLQVCEPKERTSTSSSSVQARRL LQVCEPKERTSTSSSSVQARRLSQPESAEKH
sp|Q9UPW0|FOXJ3_HUMAN_223	K.VTLYNTDQDGSDSphosPR.S	K.VTLYNTDQDGSDSphosPR.S	-0.814856	0.278119	16	17	sp|Q9UPW0|FOXJ3_HUMAN	STYX	CENTER	1	1	0.994	0.984	TNKVTLYNTDQDGSDSPRSSLNNSLSDQSLA
sp|Q9UQ13|SHOC2_HUMAN_85 86_C	R.KK(SS)phosNAEVIK.E	R.KK(SS)phosNAEVIK.E	-0.814856	-0.241255	1	1	sp|Q9UQ13|SHOC2_HUMAN	STYX	CENTER	0.9413	0.9933	1	1	NTIKRPNPAPGTRKKSSNAEVIKELNKCREE TIKRPNPAPGTRKKSSNAEVIKELNKCREEN
sp|Q9UQ35|SRRM2_HUMAN_1336	R.NSphosGPLGTEMNTGFSSEVK.E	R.NSphosGPLGTEMNTGFSSEVK.E	-0.814856	0.00835882	5	3	sp|Q9UQ35|SRRM2_HUMAN	STYX	CENTER	1	1	0.978	0.999	PLRENSFGSPLEFRNSGPLGTEMNTGFSSEV
sp|Q9UQ35|SRRM2_HUMAN_1441 1443 1444_C	R.SRSphosG(SS)phosPGLR.D	R.SRSphosG(SS)phosPGLR.D	-0.814856	-0.133195	9	9	sp|Q9UQ35|SRRM2_HUMAN	STYX	CENTER	0.9822	0.9981	1.334	1.304	EMKDGLPRTPSRRSRSGSSPGLRDGSGTPSR KDGLPRTPSRRSRSGSSPGLRDGSGTPSRHS DGLPRTPSRRSRSGSSPGLRDGSGTPSRHSL
sp|Q9Y4A5|TRRAP_HUMAN_2051	R.GLSphosVDSAQEVK.R	R.GLSphosVDSAQEVK.R	-0.814856	0.446801	25	17	sp|Q9Y4A5|TRRAP_HUMAN	STYX	CENTER	1	1	0.998	0.997	GEGVNSVSSSIKRGLSVDSAQEVKRFRTATG
tr|A0A494C1M5|A0A494C1M5_HUMAN_117	R.SRSphosQSSQLK.Q	R.SRSphosQSSQLK.Q	-0.814856	-0.163253	1	1	tr|A0A494C1M5|A0A494C1M5_HUMAN	STYQ	CENTER	0.9933	0.9994	0.935	0.959	VASPKLPERESERSRSQSSQLKQTDTSEEGS
sp|O15014|ZN609_HUMAN_758	R.AEEGKSphosPFR.E	R.AEEGKSphosPFR.E	-0.814145	0.0870708	10	18	sp|O15014|ZN609_HUMAN	STYX	CENTER	1	1	1	1	SPLTPGKVCRAEEGKSPFRESSGDGMKMEGL
sp|Q9Y6I9|TX264_HUMAN_239	R.ETSphosAATLSPGASSR.G	R.ETSphosAATLSPGASSR.G	-0.813435	-0.209546	2	5	sp|Q9Y6I9|TX264_HUMAN	STYX	CENTER	0.9993	0.9999	0.997	0.996	TSSVSLEVSPGSRETSAATLSPGASSRGWDD
sp|Q14938|NFIX_HUMAN_301	R.SphosPAAGSSQSSGWPNDVDAGPASLKK.S	R.SphosPAAGSSQSSGWPNDVDAGPASLK.K	-0.8106	0.533678	2	5	sp|Q14938|NFIX_HUMAN	STYX	CENTER	0.9934	0.9975	0.969	0.985	MESPVDDVFYPGTGRSPAAGSSQSSGWPNDV
sp|O00267|SPT5H_HUMAN_671	R.ISSphosPMHPSAGGQR.G	R.ISSphosPMHPSAGGQR.G	-0.807073	0.693157	6	7	sp|O00267|SPT5H_HUMAN	STYX	Q1	0.9993	1	0.991	0.991	NFTVGGFAPMSPRISSPMHPSAGGQRGGFGS
sp|Q8TDY2|RBCC1_HUMAN_1484	R.LMSQSphosMSSVSSR.H	R.LMSQSphosMSSVSSR.H	-0.80637	-0.193949	4	1	sp|Q8TDY2|RBCC1_HUMAN	STYX	CENTER	0.997	0.9915	0.992	0.989	KEEENKRLNQRLMSQSMSSVSSRHSEKIAIR
sp|Q86VX9|MON1A_HUMAN_188	R.QISphosQDFSELSTQLTGVAR.D	R.QISphosQDFSELSTQLTGVAR.D	-0.805901	0.311286	8	1	sp|Q86VX9|MON1A_HUMAN	STYQ	CENTER	1	1	0.982	0.994	GTRGPPPLPTDMRQISQDFSELSTQLTGVAR
sp|Q92945|FUBP2_HUMAN_274	K.MILIQDGSphosQNTNVDKPLR.L	K.MILIQDGSphosQNTNVDKPLR.L	-0.805667	2.92337	2	6	sp|Q92945|FUBP2_HUMAN	STYQ	Q1	0.9998	1	0.987	0.993	LQERAGVKMILIQDGSQNTNVDKPLRIIGDP
sp|O14974|MYPT1_HUMAN_995	R.RISphosEMEEELK.M	R.RISphosEMEEELK.M	-0.805667	-0.178519	8	3	sp|O14974|MYPT1_HUMAN	STYX	CENTER	0.9999	0.9997	1	1	LEMEKRERRALERRISEMEEELKMLPDLKAD
sp|P28290|ITPI2_HUMAN_649 650_C	R.EASAESDVGK(SS)phosESEFTQYTTHHILK.S	R.EASAESDVGK(SS)phosESEFTQYTTHHILK.S	-0.805667	0.0613077	8	5	sp|P28290|ITPI2_HUMAN	STYX	CENTER	0.9942	0.971	0.996	0.996	VELLREASAESDVGKSSESEFTQYTTHHILK ELLREASAESDVGKSSESEFTQYTTHHILKS
sp|Q6UB99|ANR11_HUMAN_1079	R.KASphosLDQGK.E	R.KASphosLDQGK.E	-0.805667	0.255577	4	11	sp|Q6UB99|ANR11_HUMAN	STYX	CENTER	0.9905	0.9997	1	1	EKHKDTHGKDKERKASLDQGKEKKEKAFPGI
sp|Q9BSI4|TINF2_HUMAN_295	R.NLGSphosPTQVISKPESK.E	R.NLGSphosPTQVISKPESK.E	-0.805667	0.375416	10	5	sp|Q9BSI4|TINF2_HUMAN	STYX	CENTER	1	1	0.997	0.996	KERPTVMLFPFRNLGSPTQVISKPESKEEHA
sp|Q9HCG8|CWC22_HUMAN_829	R.NSphosFSENEK.H	R.RNSphosFSENEK.H	-0.805667	-0.0326684	22	18	sp|Q9HCG8|CWC22_HUMAN	STYX	CENTER	0.9994	0.9999	0.995	0.995	NKHGDPKKKRGERRNSFSENEKHTHRIKDSE
sp|Q9NYJ8|TAB2_HUMAN_524	R.KLSphosMGSDDAAYTQAL.L	R.KLSphosMGSDDAAYTQALLVHQK.A	-0.805667	0.249784	10	14	sp|Q9NYJ8|TAB2_HUMAN	STYX	CENTER	1	1	0.995	0.995	PTLAHVDRISETRKLSMGSDDAAYTQALLVH
sp|Q9NXE4|NSMA3_HUMAN_792	R.HLLSphosPVGR.R	R.HLLSphosPVGR.R	-0.800069	-0.778912	2	1	sp|Q9NXE4|NSMA3_HUMAN	STYX	Q4	0.997	0.9973	1	1	RYHLTEPGLASRHLLSPVGRRQVAGHTRGPR
sp|Q53RY4|KCP3_HUMAN_5	R.RCSphosLCAFDAAR.G	R.RCSphosLCAFDAAR.G	-0.797634	0.758745	4	3	sp|Q53RY4|KCP3_HUMAN	STYX	Q1	1	1	1	1	___________MRRCSLCAFDAARGPRRLMR
sp|P08727|K1C19_HUMAN_397	R.SLLEGQEDHYNNLSASphosKVL.-	R.SLLEGQEDHYNNLSASphosKVL.-	-0.797519	-1.37556	4	3	sp|P08727|K1C19_HUMAN	STYX	Q4	1	1	0.997	0.997	SLLEGQEDHYNNLSASKVL____________
sp|P48651|PTSS1_HUMAN_11	R.TLSphosKDDVNYK.M	R.TLSphosKDDVNYK.M	-0.79694	-0.0606828	4	3	sp|P48651|PTSS1_HUMAN	STYX	CENTER	0.9977	0.9987	0.995	0.995	_____MASCVGSRTLSKDDVNYKMHFRMINE
sp|Q6UX04|CWC27_HUMAN_299	K.SphosAGEGEVEKK.S	K.SphosAGEGEVEKK.S	-0.796593	-0.0466076	8	5	sp|Q6UX04|CWC27_HUMAN	STYX	CENTER	0.9986	0.9998	1	1	RIAKKLKKDTSANVKSAGEGEVEKKSVSRSE
sp|Q9UQ35|SRRM2_HUMAN_1320 1329	K.ELSNSphosPLRENSFGSphosPLEFR.N	K.ELSNSphosPLRENSFGSphosPLEFR.N	-0.796593	-0.340791	12	1	sp|Q9UQ35|SRRM2_HUMAN	STYX	CENTER	0.9877	0.9992	0.974	0.861	WGGPHFSPEHKELSNSPLRENSFGSPLEFRN HKELSNSPLRENSFGSPLEFRNSGPLGTEMN
sp|O95071|UBR5_HUMAN_327	R.WLDGASphosFDNER.G	R.WLDGASphosFDNER.G	-0.796478	0.790454	11	15	sp|O95071|UBR5_HUMAN	STYX	Q1	1	0.9999	1	1	ESVLRLRERRWLDGASFDNERGSTSKEGEPN
sp|Q13435|SF3B2_HUMAN_344	R.GVSSphosESSGDREK.D	R.GVSSphosESSGDREK.D	-0.796478	1.00836	7	5	sp|Q13435|SF3B2_HUMAN	STYX	Q1	0.9963	0.9979	0.995	0.987	NRKKKKKPQRVRGVSSESSGDREKDSTRSRG
sp|Q9UQ35|SRRM2_HUMAN_1893	R.SRTSphosPVSR.R	R.SRTSphosPVSR.R	-0.796478	0.606742	3	1	sp|Q9UQ35|SRRM2_HUMAN	STYX	Q1	0.9728	0.9539	0.973	0.933	SRTPLISRRRSRSRTSPVSRRRSRSRTSVTR
sp|O43502|RA51C_HUMAN_20	R.DLVSFPLSphosPAVR.V	R.DLVSFPLSphosPAVR.V	-0.796478	-0.688714	1	1	sp|O43502|RA51C_HUMAN	STYX	Q4	0.9979	0.9999	0.956	0.993	TFRFEMQRDLVSFPLSPAVRVKLVSAGFQTA
sp|O75427|LRCH4_HUMAN_506	R.PLGSIQRPNSphosFLFR.S	R.PLGSIQRPNSphosFLFR.S	-0.796478	-2.03267	6	1	sp|O75427|LRCH4_HUMAN	STYX	Q4	0.9937	0.9925	0.997	0.996	TAPAPRPLGSIQRPNSFLFRSSSQSGSGPSS
sp|P05787|K2C8_HUMAN_449 450 451_C	Y.GGLTSPGLSYSLGSSFGSGAG(SSS)phosFSR.T	Y.SLGSSFGSGAG(SSS)phosFSR.T	-0.796478	-0.614204	5	2	sp|P05787|K2C8_HUMAN	STYX	Q4	0.9467	0.9502	0.997	0.996	GLSYSLGSSFGSGAGSSSFSRTSSSRAVVVK LSYSLGSSFGSGAGSSSFSRTSSSRAVVVKK SYSLGSSFGSGAGSSSFSRTSSSRAVVVKKI
sp|P21333|FLNA_HUMAN_2284	K.AEISphosFEDRK.D	K.AEISphosFEDRK.D	-0.796478	-1.41118	3	3	sp|P21333|FLNA_HUMAN	STYX	Q4	0.9989	0.999	1	1	GGLAIAVEGPSKAEISFEDRKDGSCGVAYVV
sp|Q9C0H5|RHG39_HUMAN_689 690_C	R.KP(SS)phosETDIENWASK.H	R.KP(SS)phosETDIENWASK.H	-0.796478	-1.88636	1	2	sp|Q9C0H5|RHG39_HUMAN	STYX	Q4	0.9995	0.9999	0.504	0.552	PSSSCVFPTFTLRKPSSETDIENWASKHFNK SSSCVFPTFTLRKPSSETDIENWASKHFNKH
sp|A6H8Y1|BDP1_HUMAN_2451	R.GSRSphosPDACMDK.N	R.GSRSphosPDACMDK.N	-0.796478	0.149535	1	5	sp|A6H8Y1|BDP1_HUMAN	STYX	CENTER	1	1	0.991	0.991	QRQQVEAAFQSRGSRSPDACMDKNVPQLPQD
sp|O14979|HNRDL_HUMAN_241	K.VFVGGLSphosPDTSEEQIK.E	K.VFVGGLSphosPDTSEEQIK.E	-0.796478	-0.0965018	6	8	sp|O14979|HNRDL_HUMAN	STYX	CENTER	1	1	0.997	0.997	LKGKEPPKKVFVGGLSPDTSEEQIKEYFGAF
sp|O60293|ZC3H1_HUMAN_1046	R.SphosFLESNYFTKPNLK.H	R.SphosFLESNYFTKPNLK.H	-0.796478	0.137257	13	19	sp|O60293|ZC3H1_HUMAN	STYX	CENTER	1	1	0.997	0.997	VDDEILSGSSRERRRSFLESNYFTKPNLKHT
sp|P18031|PTN1_HUMAN_378	R.VVGGSphosLR.G	R.VVGGSphosLR.G	-0.796478	-0.594464	11	4	sp|P18031|PTN1_HUMAN	STYX	CENTER	0.9915	0.9895	1	1	SMSQDTEVRSRVVGGSLRGAQAASPAKGEPS
sp|P27816|MAP4_HUMAN_1000 1001 1002_C	K.KV(SYS)phosHIQ.S	K.KV(SYS)phosHIQSK.C	-0.796478	-0.00518771	1	2	sp|P27816|MAP4_HUMAN	STYX	CENTER	0.9768	0.9994	1.001	0.999	QKQPAGKVQIVSKKVSYSHIQSKCGSKDNIK KQPAGKVQIVSKKVSYSHIQSKCGSKDNIKH QPAGKVQIVSKKVSYSHIQSKCGSKDNIKHV
sp|P51116|FXR2_HUMAN_505 506_C	S.(SS)phosISSVLK.D	S.(SS)phosISSVLK.D	-0.796478	0.112382	3	2	sp|P51116|FXR2_HUMAN	STYX	CENTER	0.9649	0.9659	0.998	0.998	RGPPPAPRPTSRYNSSSISSVLKDPDSNPYS GPPPAPRPTSRYNSSSISSVLKDPDSNPYSL
sp|P51532|SMCA4_HUMAN_1417	K.RDSphosDAGSSTPTTSTR.S	R.KRDSphosDAGSSTPTTSTR.S	-0.796478	0.105972	1	2	sp|P51532|SMCA4_HUMAN	STYX	CENTER	0.9998	1	0.997	0.997	EEVRQKKSSRKRKRDSDAGSSTPTTSTRSRD
sp|P52564|MP2K6_HUMAN_207	S.GYLVDSphosVAK.T	S.GYLVDSphosVAK.T	-0.796478	-0.257375	5	1	sp|P52564|MP2K6_HUMAN	STYX	CENTER	0.9788	0.9616	0.998	0.997	QVKMCDFGISGYLVDSVAKTIDAGCKPYMAP
sp|P60468|SC61B_HUMAN_49	R.TTSphosAGTGGMWR.F	R.TTSphosAGTGGMWR.F	-0.796478	-0.375556	7	9	sp|P60468|SC61B_HUMAN	STYX	CENTER	0.9997	0.9999	0.993	0.991	RKNASCGTRSAGRTTSAGTGGMWRFYTEDSP
sp|Q05397|FAK1_HUMAN_843	R.LSRGSphosIDREDGSLQGPIGNQH.L	R.LSRGSphosIDREDGSLQGPIGN.Q	-0.796478	0.00835882	3	8	sp|Q05397|FAK1_HUMAN	STYX	CENTER	1	0.9976	0.995	0.984	KEERFLKPDVRLSRGSIDREDGSLQGPIGNQ
sp|Q09161|NCBP1_HUMAN_21 22_C	K.(TS)phosDANETEDHLESLICK.V	R.RK(TS)phosDANETEDHLESLICK.V	-0.796478	0.124873	66	41	sp|Q09161|NCBP1_HUMAN	STYX	CENTER	1	1	1	1	HSDENDGGQPHKRRKTSDANETEDHLESLIC SDENDGGQPHKRRKTSDANETEDHLESLICK
sp|Q14152|EIF3A_HUMAN_988	R.GADDDRPSphosWR.N	R.GADDDRPSphosWR.N	-0.796478	0.426763	1	1	sp|Q14152|EIF3A_HUMAN	STYX	CENTER	0.999	0.9959	1	1	EEDRFSRRGADDDRPSWRNTDDDRPPRRIAD
sp|Q15149|PLEC_HUMAN_2688	R.LVASphosMEEAR.R	R.LVASphosMEEAR.R	-0.796478	-0.265894	1	2	sp|Q15149|PLEC_HUMAN	STYX	CENTER	0.9961	0.9989	1	1	RQQQQMEQERQRLVASMEEARRRQHEAEEGV
sp|Q16891|MIC60_HUMAN_115	K.ISSVSphosEVMK.E	K.ISSVSphosEVMK.E	-0.796478	-0.0466076	1	1	sp|Q16891|MIC60_HUMAN	STYX	CENTER	0.9862	0.9974	0.853	0.874	PKKSIQSGPLKISSVSEVMKESKQPASQLQK
sp|Q6PJI9|WDR59_HUMAN_830	R.FGSphosLTYSDPR.E	R.FGSphosLTYSDPR.E	-0.796478	0.446801	7	3	sp|Q6PJI9|WDR59_HUMAN	STYX	CENTER	0.9992	0.9992	0.997	0.996	SSPWGESSPEELRFGSLTYSDPRERERDQHD
sp|Q6SPF0|SAMD1_HUMAN_427	A.SVATGPDSPSphosPVPLPPGKPALPGADGTPFGCPPGRK.E	K.EGGTASVATGPDSPSphosPVPLPPGKPALPGADGTPFGCPPGR.K	-0.796478	-0.0326684	1	1	sp|Q6SPF0|SAMD1_HUMAN	STYX	CENTER	0.9773	0.9761	0.848	0.936	KEGGTASVATGPDSPSPVPLPPGKPALPGAD
sp|Q86VM9|ZCH18_HUMAN_93 94 95_C	R.GP(TSS)phosPCEEEGDEGEEDRTSDLR.D	R.GP(TSS)phosPCEEEGDEGEEDRTSDLR.D	-0.796478	0.354355	3	1	sp|Q86VM9|ZCH18_HUMAN	STYX	CENTER	0.9999	0.9985	1	0.999	SQDQDSEVNELSRGPTSSPCEEEGDEGEEDR QDQDSEVNELSRGPTSSPCEEEGDEGEEDRT DQDSEVNELSRGPTSSPCEEEGDEGEEDRTS
sp|Q8IX18|DHX40_HUMAN_197	K.LFQEKSphosPNRK.E	K.LFQEKSphosPNR.K	-0.796478	0.160435	4	6	sp|Q8IX18|DHX40_HUMAN	STYX	CENTER	0.9965	0.9987	1	1	TDILFGLLKKLFQEKSPNRKEHLKVVVMSAT
sp|Q8IYB3|SRRM1_HUMAN_463	R.KVELSphosESEEDKGGK.M	R.KVELSphosESEEDKGGK.M	-0.796478	-0.163253	9	10	sp|Q8IYB3|SRRM1_HUMAN	STYX	CENTER	1	1	0.991	0.994	RESPSPAPKPRKVELSESEEDKGGKMAAADS
sp|Q8NEM7|SP20H_HUMAN_508 509 519_C	R.K(SS)phosVDLNQVSMLSphosPAALSPASSSQR.T	R.K(SS)phosVDLNQVSMLSphosPAALSPASSSQR.T	-0.796478	0.52428	1	1	sp|Q8NEM7|SP20H_HUMAN	STYX	CENTER	0.9963	0.9876	0.95	1.02	PTPPPSSKPSSIPRKSSVDLNQVSMLSPAAL TPPPSSKPSSIPRKSSVDLNQVSMLSPAALS IPRKSSVDLNQVSMLSPAALSPASSSQRTTA
sp|Q8TCN5|ZN507_HUMAN_195	K.AQQCVSphosPSSSLCR.K	K.AQQCVSphosPSSSLCR.K	-0.796478	0.112382	5	6	sp|Q8TCN5|ZN507_HUMAN	STYX	CENTER	1	1	0.995	0.995	NDANIHTQSKAQQCVSPSSSLCRKTTERNET
sp|Q92844|TANK_HUMAN_228	R.DEEDTSFESphosLSKFNVK.F	R.DEEDTSFESphosLSK.F	-0.796478	0.584297	5	12	sp|Q92844|TANK_HUMAN	STYX	CENTER	1	1	0.994	0.996	TPRGLCRDEEDTSFESLSKFNVKFPPMDNDS
sp|Q96HS1|PGAM5_HUMAN_80	R.NVESphosGEEELASK.L	R.NVESphosGEEELASK.L	-0.796478	0.490724	5	2	sp|Q96HS1|PGAM5_HUMAN	STYX	CENTER	1	0.999	0.998	0.998	REPLSLINVRKRNVESGEEELASKLDHYKAK
sp|Q96N67|DOCK7_HUMAN_182	R.SMSphosIDDTPR.G	R.SMSphosIDDTPR.G	-0.796478	0.405536	9	8	sp|Q96N67|DOCK7_HUMAN	STYX	CENTER	0.9997	0.9999	0.995	0.995	NSYQDDQDDLKRRSMSIDDTPRGSWACSIFD
sp|Q9BQ70|TCF25_HUMAN_137 138 139_C	K.K(SST)phosGEASENGLEDIDR.L	K.(SST)phosGEASENGLEDIDR.L	-0.796478	0.416639	1	12	sp|Q9BQ70|TCF25_HUMAN	STYX	CENTER	0.9999	1	0.998	1	SGKLRKKKKKQKNKKSSTGEASENGLEDIDR GKLRKKKKKQKNKKSSTGEASENGLEDIDRI KLRKKKKKQKNKKSSTGEASENGLEDIDRIL
sp|Q9BYD6|RM01_HUMAN_297 298 299 300_C	R.(SSTS)phosEGLLLK.L	R.(SSTS)phosEGLLLK.L	-0.796478	-0.306843	1	3	sp|Q9BYD6|RM01_HUMAN	STYX	CENTER	0.9943	0.9998	1	1.001	RPLNLGPFVVRAFLRSSTSEGLLLKIDPLLP PLNLGPFVVRAFLRSSTSEGLLLKIDPLLPK LNLGPFVVRAFLRSSTSEGLLLKIDPLLPKE NLGPFVVRAFLRSSTSEGLLLKIDPLLPKEV
sp|Q9NP61|ARFG3_HUMAN_428	K.AISphosSDMYFGR.Q	K.AISphosSDMYFGR.Q	-0.796478	0.311286	7	1	sp|Q9NP61|ARFG3_HUMAN	STYX	CENTER	0.9993	0.9923	0.98	0.972	NTDEAQKKFGNVKAISSDMYFGRQSQADYET
sp|Q9NRL2|BAZ1A_HUMAN_1279 1280 1281_C	K.L(SSS)phosFSSR.G	K.L(SSS)phosFSSR.G	-0.796478	-0.0466076	3	3	sp|Q9NRL2|BAZ1A_HUMAN	STYX	CENTER	0.9925	0.9949	0.997	0.998	GRPQVRLPVKTRGKLSSSFSSRGQQQEPGRY RPQVRLPVKTRGKLSSSFSSRGQQQEPGRYP PQVRLPVKTRGKLSSSFSSRGQQQEPGRYPS
sp|Q9UHD8|SEPT9_HUMAN_22	R.LGDSphosSGPALK.R	R.LGDSphosSGPALK.R	-0.796478	-0.0550197	1	4	sp|Q9UHD8|SEPT9_HUMAN	STYX	CENTER	0.9969	0.9997	0.909	0.973	GGTRTSSGRLRRLGDSSGPALKRSFEVEEVE
sp|Q9UHV7|MED13_HUMAN_395	R.KYSphosASSGGLCEEATAAK.V	R.KYSphosASSGGLCEEATAAK.V	-0.796478	-0.103752	8	7	sp|Q9UHV7|MED13_HUMAN	STYX	CENTER	1	1	0.996	0.996	WQECNMNRAQNKRKYSASSGGLCEEATAAKV
sp|Q9UPQ3|AGAP1_HUMAN_521	K.LDPPPSphosPHANR.K	K.LDPPPSphosPHANR.K	-0.796478	-0.290165	5	17	sp|Q9UPQ3|AGAP1_HUMAN	STYX	CENTER	0.9998	1	1	1	PSISSTTSPKLDPPPSPHANRKKHRRKKSTS
sp|Q9Y4W2|LAS1L_HUMAN_617	F.STGQESphosPTAENAR.L	R.MEVGPFSTGQESphosPTAENAR.L	-0.796478	-0.104414	5	12	sp|Q9Y4W2|LAS1L_HUMAN	STYX	CENTER	1	1	0.996	0.995	EEDRMEVGPFSTGQESPTAENARLLAQKRGA
tr|B7ZKQ9|B7ZKQ9_HUMAN_474	K.GSphosVLQEAKL.-	K.GSphosVLQEAKL.-	-0.796478	0.406443	5	5	tr|B7ZKQ9|B7ZKQ9_HUMAN	STYX	CENTER	0.9995	0.9986	1	1	IQAYSESLMTSAPKGSVLQEAKL________
tr|E9PGZ1|E9PGZ1_HUMAN_196	K.RGSphosIGENQIK.D	K.RGSphosIGENQIKDEK.L	-0.796478	0.0742468	27	51	tr|E9PGZ1|E9PGZ1_HUMAN	STYX	CENTER	1	1	1	1	DKEKEEEEEEKPKRGSIGENQIKDEKIKKDK
sp|Q8WWY3|PRP31_HUMAN_451 455	R.SSGTASSphosVAFTphosPLQGLEIVNPQAAEKK.V	R.SSGTASSphosVAFTphosPLQGLEIVNPQAAEKK.V	-0.795323	-0.209546	4	1	sp|Q8WWY3|PRP31_HUMAN	STYX	CENTER	0.9984	0.9977	0.941	0.928	GGKSTIRDRSSGTASSVAFTPLQGLEIVNPQ TIRDRSSGTASSVAFTPLQGLEIVNPQAAEK
sp|P49792|RBP2_HUMAN_1575 1576 1577_C	R.CVACQNPDKPSP(STS)phosVPAPASFK.F	R.CVACQNPDKPSP(STS)phosVPAPASFK.F	-0.793133	-0.273677	2	3	sp|P49792|RBP2_HUMAN	STYX	CENTER	0.9948	1	0.577	0.815	ATRCVACQNPDKPSPSTSVPAPASFKFGTSE TRCVACQNPDKPSPSTSVPAPASFKFGTSET RCVACQNPDKPSPSTSVPAPASFKFGTSETS
sp|Q9UHB7|AFF4_HUMAN_836	R.TISphosQSSSLK.S	R.TISphosQSSSLK.S	-0.792099	0.338105	6	6	sp|Q9UHB7|AFF4_HUMAN	STYQ	CENTER	0.9994	0.9998	0.996	0.993	SKDPKTEHGSRKRTISQSSSLKSSSNSNKET
sp|Q9ULT0|TTC7A_HUMAN_647	K.DGSphosFGEGLTMK.K	K.DGSphosFGEGLTMK.K	-0.792099	-0.57837	12	2	sp|Q9ULT0|TTC7A_HUMAN	STYX	CENTER	1	0.9998	0.998	0.998	TLYSFSQLGGLEKDGSFGEGLTMKKQSGMHL
sp|Q7Z589|EMSY_HUMAN_209 210 211 212 213_C	R.RTN(SSSSS)phosPVVLK.E	N.(SSSSS)phosPVVLK.E	-0.790836	-0.375556	6	10	sp|Q7Z589|EMSY_HUMAN	STYX	CENTER	0.9879	0.9996	1.001	1	CSDEDEKPRKRRRTNSSSSSPVVLKEVPKAV SDEDEKPRKRRRTNSSSSSPVVLKEVPKAVV DEDEKPRKRRRTNSSSSSPVVLKEVPKAVVP EDEKPRKRRRTNSSSSSPVVLKEVPKAVVPV DEKPRKRRRTNSSSSSPVVLKEVPKAVVPVS
sp|Q6NZ36|FAP20_HUMAN_113	R.LLHGAGGHLESphosPAR.S	R.LLHGAGGHLESphosPAR.S	-0.789919	0.567081	4	4	sp|Q6NZ36|FAP20_HUMAN	STYX	CENTER	1	1	1	1	GRSYRLLHGAGGHLESPARSLPQRPAPDPCR
sp|Q2YD98|UVSSA_HUMAN_475 476_C	R.DHLPPP(SS)phosASPSR.A	R.DHLPPP(SS)phosASPSR.A	-0.78969	0.650596	2	17	sp|Q2YD98|UVSSA_HUMAN	STYX	Q1	0.9992	1	0.53	0.666	AAAQLRQLRDHLPPPSSASPSRALPEPQEAQ AAQLRQLRDHLPPPSSASPSRALPEPQEAQK
sp|Q5T0W9|FA83B_HUMAN_388 389_C	K.RH(SY)phosAGEQPETVPY.L	R.H(SY)phosAGEQPETVPYLLLNR.A	-0.788089	-0.466322	4	7	sp|Q5T0W9|FA83B_HUMAN	STYX	CENTER	1	1	1	1	RQFQPNQINENWKRHSYAGEQPETVPYLLLN QFQPNQINENWKRHSYAGEQPETVPYLLLNR
sp|Q15788|NCOA1_HUMAN_395	R.VNPSVNPSISphosPAHGVAR.S	R.VNPSVNPSISphosPAHGVAR.S	-0.787632	0.197629	2	3	sp|Q15788|NCOA1_HUMAN	STYX	CENTER	0.9999	1	0.958	0.971	GMSIPRVNPSVNPSISPAHGVARSSTLPPSN
tr|K7EMZ9|K7EMZ9_HUMAN_173	K.TQLSphosQAEVHK.V	K.TQLSphosQAEVHK.V	-0.787632	0.300315	4	9	tr|K7EMZ9|K7EMZ9_HUMAN	STYQ	CENTER	0.9953	0.9997	0.997	0.995	GSAFTQDTRSLKTQLSQAEVHKVSRPENEQL
sp|Q6KC79|NIPBL_HUMAN_305 306_C	K.GSRPPLILQSQSLPC(SS)phosPR.D	K.GSRPPLILQSQSLPC(SS)phosPR.D	-0.787518	0.304548	4	14	sp|Q6KC79|NIPBL_HUMAN	STYX	CENTER	1	1	0.998	0.999	GSRPPLILQSQSLPCSSPRDVPPDILLDSPE SRPPLILQSQSLPCSSPRDVPPDILLDSPER
sp|Q9Y4B6|DCAF1_HUMAN_979	R.QKSphosDHGAYSQSPAIK.K	K.SphosDHGAYSQSPAIK.K	-0.787404	1.17358	6	4	sp|Q9Y4B6|DCAF1_HUMAN	STYX	Q1	0.9991	1	0.994	0.995	PSPCNGRKIRVLRQKSDHGAYSQSPAIKKQL
sp|Q9NP61|ARFG3_HUMAN_428 429_C	K.AI(SS)phosDMYFGR.Q	K.AI(SS)phosDMYFGR.Q	-0.787404	5.40003	6	1	sp|Q9NP61|ARFG3_HUMAN	STYX	NR	0.9997	0.9912	0.998	0.985	NTDEAQKKFGNVKAISSDMYFGRQSQADYET TDEAQKKFGNVKAISSDMYFGRQSQADYETR
sp|A6NFI3|ZN316_HUMAN_112	R.GGDAKSphosPVLQEK.G	R.GGDAKSphosPVLQEK.G	-0.787404	-0.0748967	20	27	sp|A6NFI3|ZN316_HUMAN	STYX	CENTER	1	1	1	1	ALGTQERLSRGGDAKSPVLQEKGLQASRAPA
sp|Q02818|NUCB1_HUMAN_369	K.AQRLSphosQETEALGR.S	K.AQRLSphosQETEALGR.S	-0.787404	0.185755	8	9	sp|Q02818|NUCB1_HUMAN	STYQ	CENTER	1	1	0.996	0.996	LAAREAELNAKAQRLSQETEALGRSQGRLEA
sp|Q6P2E9|EDC4_HUMAN_583	R.IVELPAPADFLSphosLSSETKPK.L	R.IVELPAPADFLSphosLSSETKPK.L	-0.787404	-0.543284	6	5	sp|Q6P2E9|EDC4_HUMAN	STYX	CENTER	1	1	0.99	0.896	DLRRIVELPAPADFLSLSSETKPKLMTPDAF
sp|Q6UB98|ANR12_HUMAN_1311	R.RCSphosMPSVICEHTK.Q	R.RCSphosMPSVICEHTK.Q	-0.787404	0.28926	4	5	sp|Q6UB98|ANR12_HUMAN	STYX	CENTER	1	1	0.994	0.995	LIISEGRPTIEVRRCSMPSVICEHTKQFQTI
sp|Q71F56|MD13L_HUMAN_2083	R.LLSphosREAPEELK.Q	R.LLSphosREAPEELK.Q	-0.787404	-0.103752	12	1	sp|Q71F56|MD13L_HUMAN	STYX	CENTER	1	0.994	1	1	GSHFQHSRSQGERLLSREAPEELKQQPLALG
sp|Q96TC7|RMD3_HUMAN_46	R.SQSphosLPNSLDYTQTSDPGR.H	R.SQSphosLPNSLDYTQTSDPGR.H	-0.787404	0.00835882	14	23	sp|Q96TC7|RMD3_HUMAN	STYX	CENTER	1	1	0.997	0.997	YSQRWKRTQRHGRSQSLPNSLDYTQTSDPGR
sp|Q9H2H9|S38A1_HUMAN_52 56	R.SphosLTNSphosHLEK.K	R.SphosLTNSphosHLEK.K	-0.787404	0.0350154	10	18	sp|Q9H2H9|S38A1_HUMAN	STYX	CENTER	0.9996	1	0.896	0.812	GQINSKFISDRESRRSLTNSHLEKKKCDEYI SKFISDRESRRSLTNSHLEKKKCDEYIPGTT
sp|Q9NWW5|CLN6_HUMAN_31	R.HGSphosVSADEAAR.T	R.HGSphosVSADEAAR.T	-0.787404	0.0482515	12	24	sp|Q9NWW5|CLN6_HUMAN	STYX	CENTER	1	1	0.993	0.992	PGAQLGASFLQARHGSVSADEAARTAPFHLD
sp|Q9UQ35|SRRM2_HUMAN_1975	R.SRTSphosPITR.R	R.SRTSphosPITR.R	-0.787404	0.0482515	4	3	sp|Q9UQ35|SRRM2_HUMAN	STYX	CENTER	0.9604	0.981	0.978	0.982	SRTPPVTRRRSRSRTSPITRRRSRSRTSPVT
sp|Q9ULW3|ABT1_HUMAN_32	K.AATEQEPLEGTEQTLDAEEEQEESphosEEAACGSK.K	K.AATEQEPLEGTEQTLDAEEEQEESphosEEAACGSK.K	-0.786605	0.209406	4	1	sp|Q9ULW3|ABT1_HUMAN	STYX	CENTER	0.9976	0.9998	0.959	0.336	EGTEQTLDAEEEQEESEEAACGSKKRVVPGI
sp|Q8NI08|NCOA7_HUMAN_208	R.VLSphosSTSEEDEPGVVK.F	R.VLSphosSTSEEDEPGVVK.F	-0.78467	1.41664	2	3	sp|Q8NI08|NCOA7_HUMAN	STYX	Q1	1	1	0.995	0.989	ADLARKALKPIERVLSSTSEEDEPGVVKFLK
sp|Q8IYW5|RN168_HUMAN_134	R.RASphosEEEENKASEEYIQR.L	R.RASphosEEEENK.A	-0.784215	-0.00518771	2	2	sp|Q8IYW5|RN168_HUMAN	STYX	CENTER	1	0.9903	0.996	1	EYEEEISKVAAERRASEEEENKASEEYIQRL
sp|Q99618|CDCA3_HUMAN_94	K.QLSphosEVFETEDSK.S	K.QLSphosEVFETEDSK.S	-0.783874	-0.667019	2	2	sp|Q99618|CDCA3_HUMAN	STYX	Q4	0.9997	0.9997	0.998	0.998	KTSSGDPPSPLVKQLSEVFETEDSKSNLPPE
sp|Q53TN4|CYBR1_HUMAN_284 285_C	R.NLALDEAGQR(ST)phosM.-	R.NLALDEAGQR(ST)phosM.-	-0.780136	-0.118398	4	2	sp|Q53TN4|CYBR1_HUMAN	STYX	CENTER	1	1	1	1	AARKRNLALDEAGQRSTM_____________ ARKRNLALDEAGQRSTM______________
sp|P42356|PI4KA_HUMAN_255 256 257_C	R.K(TSS)phosVSSISQVSPER.G	R.K(TSS)phosVSSISQVSPER.G	-0.779232	0.641905	2	10	sp|P42356|PI4KA_HUMAN	STYX	Q1	0.9885	0.9999	0.666	0.999	SNLLTVCQEGTLKRKTSSVSSISQVSPERGM NLLTVCQEGTLKRKTSSVSSISQVSPERGMP LLTVCQEGTLKRKTSSVSSISQVSPERGMPP
sp|Q04656|ATP7A_HUMAN_1466	R.ASINSphosLLSDKR.S	R.ASINSphosLLSDKR.S	-0.778443	-0.133195	4	7	sp|Q04656|ATP7A_HUMAN	STYX	CENTER	0.9999	1	0.997	0.996	GLLDRIVNYSRASINSLLSDKRSLNSVVTSE
sp|Q96HP0|DOCK6_HUMAN_176	R.RGSphosGSPEDTPR.S	R.RGSphosGSPEDTPR.S	-0.778443	0.278119	10	12	sp|Q96HP0|DOCK6_HUMAN	STYX	CENTER	1	1	0.992	0.982	DERSGPEDSNDSRRGSGSPEDTPRSSGASSI
sp|Q92844|TANK_HUMAN_126	R.SphosLGSPLLHER.G	R.SphosLGSPLLHER.G	-0.77833	1.14341	4	9	sp|Q92844|TANK_HUMAN	STYX	Q1	1	1	0.969	0.997	RRQEVSSPRKETSARSLGSPLLHERGNIEKT
sp|Q06413|MEF2C_HUMAN_222	R.NSphosPGLLVSPGNLNK.N	R.NSphosPGLLVSPGNLNK.N	-0.77833	-2.82622	1	1	sp|Q06413|MEF2C_HUMAN	STYX	Q4	1	0.9991	0.981	0.965	GAGTSAGNGYGNPRNSPGLLVSPGNLNKNMQ
sp|Q8WUA4|TF3C2_HUMAN_25	A.LGEAGPVGNMTVVDSphosPGQEVLNQLDVK.T	N.MTVVDSphosPGQEVLNQLDVK.T	-0.77833	-1.56318	18	3	sp|Q8WUA4|TF3C2_HUMAN	STYX	Q4	1	1	1	0.998	ALGEAGPVGNMTVVDSPGQEVLNQLDVKTSS
sp|A1XBS5|FA92A_HUMAN_241 243	R.ANSphosKSphosPLQR.S	R.ANSphosKSphosPLQR.S	-0.77833	-0.133195	2	6	sp|A1XBS5|FA92A_HUMAN	STYX	CENTER	0.991	0.9973	1	1	YAPDYSSRLDIVRANSKSPLQRSLSAKCVSG PDYSSRLDIVRANSKSPLQRSLSAKCVSGTG
sp|O15085|ARHGB_HUMAN_1462	K.SLGGESSGGTTphosPVGSFHTEAAR.W	K.SLGGESSGGTTphosPVGSFHTEAAR.W	-0.77833	-0.122088	1	2	sp|O15085|ARHGB_HUMAN	STYX	CENTER	0.9902	0.9984	0.939	0.91	RELLKSLGGESSGGTTPVGSFHTEAARWTDG
sp|O15226|NKRF_HUMAN_618	R.SESphosHTDLTFSR.E	R.SESphosHTDLTFSR.E	-0.77833	0.495711	6	5	sp|O15226|NKRF_HUMAN	STYX	CENTER	1	1	0.989	0.988	KRDIEQIIRNYARSESHTDLTFSRELTNDER
sp|O60716|CTND1_HUMAN_269	R.VGGSSphosVDLHR.F	R.VGGSSphosVDLHR.F	-0.77833	0.579775	1	1	sp|O60716|CTND1_HUMAN	STYX	CENTER	0.9998	0.9998	0.977	0.979	QDVYGPQPQVRVGGSSVDLHRFHPEPYGLED
sp|O94915|FRYL_HUMAN_1957	R.RRSphosNTLDIMDGR.L	R.SphosNTLDIMDGR.L	-0.77833	0.173782	5	19	sp|O94915|FRYL_HUMAN	STYX	CENTER	1	1	0.994	0.996	LRLSLIGDRRGDRRRSNTLDIMDGRINHSSS
sp|P05783|K1C18_HUMAN_15	R.SphosLGSVQAPSYGARPVSSAASVY.A	R.SphosLGSVQAPSYGAR.P	-0.77833	0.396175	25	9	sp|P05783|K1C18_HUMAN	STYX	CENTER	1	1	0.998	0.999	_MSFTTRSTFSTNYRSLGSVQAPSYGARPVS
sp|P08195|4F2_HUMAN_165	K.FTGLSphosKEELLK.V	K.FTGLSphosKEELLK.V	-0.77833	-0.523655	9	5	sp|P08195|4F2_HUMAN	STYX	CENTER	0.9988	0.9992	0.998	0.997	EDEAEAAAAAKFTGLSKEELLKVAGSPGWVR
sp|P15311|EZRI_HUMAN_539	R.QLLTLSSELSphosQAR.D	R.QLLTLSSELSphosQAR.D	-0.77833	0.0482515	13	11	sp|P15311|EZRI_HUMAN	STYQ	CENTER	1	1	0.985	0.974	NERVQRQLLTLSSELSQARDENKRTHNDIIH
sp|P40926|MDHM_HUMAN_61	R.LTLYDIAHTphosPGVAADLSHIETK.A	R.LTLYDIAHTphosPGVAADLSHIETK.A	-0.77833	-0.306843	2	3	sp|P40926|MDHM_HUMAN	STYX	CENTER	1	1	0.973	0.997	NSPLVSRLTLYDIAHTPGVAADLSHIETKAA
sp|P43243|MATR3_HUMAN_674	S.SphosVGDETDLANLGDVASDGKK.E	S.SphosVGDETDLANLGDVASDGKK.E	-0.77833	0.0482515	1	1	sp|P43243|MATR3_HUMAN	STYX	CENTER	0.9944	1	0.84	0.772	LVDEEEAAALLESGSSVGDETDLANLGDVAS
sp|P49761|CLK3_HUMAN_215	R.RDSphosDTYR.C	R.RDSphosDTYR.C	-0.77833	-0.0606828	9	11	sp|P49761|CLK3_HUMAN	STYX	CENTER	0.9983	0.9992	0.977	0.994	HDRLPYQRRYRERRDSDTYRCEERSPSFGED
sp|P52272|HNRPM_HUMAN_29	K.MEEESGAPGVPSphosGNGAPGPK.G	K.MEEESGAPGVPSphosGNGAPGPK.G	-0.77833	0.118627	1	10	sp|P52272|HNRPM_HUMAN	STYX	CENTER	1	1	0.985	0.996	TEIKMEEESGAPGVPSGNGAPGPKGEGERPA
sp|P54646|AAPK2_HUMAN_172 173_C	R.(TS)phosCGSPNYAAPEVISGR.L	K.IADFGLSNMMSDGEFLR(TS)phosCGSPNYAAPEVISGR.L	-0.77833	-0.178519	3	5	sp|P54646|AAPK2_HUMAN	STYX	CENTER	1	1	0.998	0.998	DFGLSNMMSDGEFLRTSCGSPNYAAPEVISG FGLSNMMSDGEFLRTSCGSPNYAAPEVISGR
sp|P57740|NU107_HUMAN_11	R.SGFGEISSphosPVIR.E	R.SGFGEISSphosPVIR.E	-0.77833	-0.563183	1	6	sp|P57740|NU107_HUMAN	STYX	CENTER	1	1	0.918	0.981	_____MDRSGFGEISSPVIREAEVTRTARKQ
sp|Q12888|TP53B_HUMAN_1656	R.KITESphosPR.A	R.KITESphosPR.A	-0.77833	-0.323717	1	3	sp|Q12888|TP53B_HUMAN	STYX	CENTER	0.9627	0.9991	0.782	0.799	ASSSSSTTPTRKITESPRASMGVLSGKRKLI
sp|Q13425|SNTB2_HUMAN_389	R.LVHSGSphosGCRSPSLGSDLTFATR.T	R.LVHSGSphosGCRSPSLGSDLTFATR.T	-0.77833	-0.103752	6	1	sp|Q13425|SNTB2_HUMAN	STYX	CENTER	0.9656	0.9637	0.523	0.47	CHSYPLVATRLVHSGSGCRSPSLGSDLTFAT
sp|Q13490|BIRC2_HUMAN_260	R.FSphosISNLSMQTHAAR.M	R.FSphosISNLSMQTHAAR.M	-0.77833	0.52428	1	3	sp|Q13490|BIRC2_HUMAN	STYX	CENTER	0.9996	1	0.511	0.992	PNCPFLENSLETLRFSISNLSMQTHAARMRT
sp|Q14789|GOGB1_HUMAN_3013 3014_C	R.QASPE(TS)phosASPDGSQNLVYETELLR.T	R.QASPE(TS)phosASPDGSQNLVYETELLR.T	-0.77833	-0.323717	1	1	sp|Q14789|GOGB1_HUMAN	STYX	CENTER	0.9976	0.9825	0.474	0.418	TQPLKVQYQRQASPETSASPDGSQNLVYETE QPLKVQYQRQASPETSASPDGSQNLVYETEL
sp|Q15061|WDR43_HUMAN_321	K.KPLTSNCTIQIATphosPGK.G	K.KPLTSNCTIQIATphosPGK.G	-0.77833	0.209406	1	3	sp|Q15061|WDR43_HUMAN	STYX	CENTER	0.9998	1	0.996	0.998	YCKKPLTSNCTIQIATPGKGKKSTPKPIPIL
sp|Q2TAK8|PWP3A_HUMAN_232 233_C	K.ASLCLNG(SS)phosLSEDDTERDMGSK.G	K.ASLCLNG(SS)phosLSEDDTERDMGSK.G	-0.77833	-0.0606828	1	1	sp|Q2TAK8|PWP3A_HUMAN	STYX	CENTER	0.9995	0.9986	0.664	0.526	RGGNSAQKASLCLNGSSLSEDDTERDMGSKG GGNSAQKASLCLNGSSLSEDDTERDMGSKGG
sp|Q5VTL8|PR38B_HUMAN_288 289 290_C	R.EGHG(SSS)phosFDR.E	R.EGHG(SSS)phosFDR.E	-0.77833	-0.306843	11	17	sp|Q5VTL8|PR38B_HUMAN	STYX	CENTER	1	1	1.001	1.001	PRRSRSRSHHREGHGSSSFDRELEREKERQR RRSRSRSHHREGHGSSSFDRELEREKERQRL RSRSRSHHREGHGSSSFDRELEREKERQRLE
sp|Q5VZL5|ZMYM4_HUMAN_1241	K.CGGVEQASSSphosPR.S	K.CGGVEQASSSphosPR.S	-0.77833	0.149535	3	8	sp|Q5VZL5|ZMYM4_HUMAN	STYX	CENTER	1	1	0.904	0.942	EQGDLKCGGVEQASSSPRSDPLGSTQDHALS
sp|Q6VY07|PACS1_HUMAN_493	K.TDLQGSphosASPSKVEGVHTPR.Q	K.TDLQGSphosASPSKVEGVHTPR.Q	-0.77833	-0.429327	3	15	sp|Q6VY07|PACS1_HUMAN	STYX	CENTER	0.9997	1	0.499	0.917	KVKTPMKSSKTDLQGSASPSKVEGVHTPRQK
sp|Q6WCQ1|MPRIP_HUMAN_891	R.TLLTGDGGGEATGSphosPLAQGK.D	R.TLLTGDGGGEATGSphosPLAQGK.D	-0.77833	-0.543419	11	10	sp|Q6WCQ1|MPRIP_HUMAN	STYX	CENTER	1	1	0.996	0.993	LRTLLTGDGGGEATGSPLAQGKDAYELEVLL
sp|Q8NFC6|BD1L1_HUMAN_482	K.YYSphosDSDDELTVEQR.R	K.YYSphosDSDDELTVEQR.R	-0.77833	-0.089252	5	2	sp|Q8NFC6|BD1L1_HUMAN	STYX	CENTER	1	0.9985	0.995	0.993	RHAYVHKPYLYSKYYSDSDDELTVEQRRQSI
sp|Q8TBZ3|WDR20_HUMAN_491 492_C	K.(SS)phosDKLNLVTK.T	K.(SS)phosDKLNLVTK.T	-0.77833	-0.156649	5	4	sp|Q8TBZ3|WDR20_HUMAN	STYX	CENTER	0.9996	0.9998	0.999	1	KDHKRNHSMGHISSKSSDKLNLVTKTKTDPA DHKRNHSMGHISSKSSDKLNLVTKTKTDPAK
sp|Q92576|PHF3_HUMAN_1148	R.KHSphosDNEAESIADALSSTSNILAS.E	R.KHSphosDNEAESIADALSSTSNIL.A	-0.77833	0.409593	15	4	sp|Q92576|PHF3_HUMAN	STYX	CENTER	1	0.9939	0.998	0.997	SPKKVKVVVGVARKHSDNEAESIADALSSTS
sp|Q96A22|CK052_HUMAN_103	K.HVHLENATEYphosATLR.F	K.HVHLENATEYphosATLR.F	-0.77833	0.278119	3	5	sp|Q96A22|CK052_HUMAN	STYX	CENTER	1	1	0.99	0.987	HAREVKHVHLENATEYATLRFPQATPRYDSK
sp|Q96GS4|BORC6_HUMAN_196	R.RATphosISSPLELEGTVSR.H	R.RATphosISSPLELEGTVSR.H	-0.77833	-0.0326684	10	9	sp|Q96GS4|BORC6_HUMAN	STYX	CENTER	1	1	0.997	0.996	SSGSAESGAGGGRRATISSPLELEGTVSRHG
sp|Q96HA1|P121A_HUMAN_378	R.GLNSphosQSSDDHLNKR.S	R.GLNSphosQSSDDHLNKR.S	-0.77833	-0.089252	1	1	sp|Q96HA1|P121A_HUMAN	STYQ	CENTER	0.9998	1	0.688	0.99	ASFVPKPGSLKRGLNSQSSDDHLNKRSRSSS
sp|Q96PE2|ARHGH_HUMAN_79	R.SLSphosPSVR.Q	R.SLSphosPSVR.Q	-0.77833	-0.176888	1	2	sp|Q96PE2|ARHGH_HUMAN	STYX	CENTER	0.9939	0.9933	0.994	0.994	GPLAAPAQPRPLRSLSPSVRQLSRRFDAPRL
sp|Q96Q42|ALS2_HUMAN_510	R.TVVLTphosPTYSGEADALLPSLR.T	R.TVVLTphosPTYSGEADALLPSLR.T	-0.77833	0.267684	1	2	sp|Q96Q42|ALS2_HUMAN	STYX	CENTER	0.9967	0.9979	0.996	0.995	LLRKAARVKTRTVVLTPTYSGEADALLPSLR
sp|Q99567|NUP88_HUMAN_168	R.FFTSSphosTSLTLK.H	R.FFTSSphosTSLTLK.H	-0.77833	0.0482515	1	3	sp|Q99567|NUP88_HUMAN	STYX	CENTER	0.9898	0.9964	0.959	0.919	VNCSTTPVAERFFTSSTSLTLKHAAWYPSEI
sp|Q9BY89|K1671_HUMAN_52	R.ILEAKSphosPLR.S	R.ILEAKSphosPLR.S	-0.77833	-0.306843	1	2	sp|Q9BY89|K1671_HUMAN	STYX	CENTER	0.9981	0.9993	1	1	GEASGAPPARILEAKSPLRSPARLLPLPRLA
sp|Q9C0H9|SRCN1_HUMAN_513	R.KDSphosGSSSVFAESPGGK.T	R.KDSphosGSSSVFAESPGGK.T	-0.77833	0.0677772	2	6	sp|Q9C0H9|SRCN1_HUMAN	STYX	CENTER	0.9966	1	0.992	0.995	PPSRGSPVRQSFRKDSGSSSVFAESPGGKTR
sp|Q9NVN8|GNL3L_HUMAN_465	K.LLHSphosPMTK.L	K.LLHSphosPMTK.L	-0.77833	0.289217	7	8	sp|Q9NVN8|GNL3L_HUMAN	STYX	CENTER	0.9995	0.9997	0.995	0.995	LGDTDPLEMEIKLLHSPMTKIADAIENKTTV
sp|Q9NWQ8|PHAG1_HUMAN_339 340 341 342 343_C	K.SGQSLTVPE(STYTS)phosIQGDPQR.S	K.SGQSLTVPE(STYTS)phosIQGDPQR.S	-0.77833	0.342995	1	2	sp|Q9NWQ8|PHAG1_HUMAN	STYX	CENTER	0.9884	0.9887	0.998	0.998	GQLVNKSGQSLTVPESTYTSIQGDPQRSPSS QLVNKSGQSLTVPESTYTSIQGDPQRSPSSC LVNKSGQSLTVPESTYTSIQGDPQRSPSSCN VNKSGQSLTVPESTYTSIQGDPQRSPSSCND NKSGQSLTVPESTYTSIQGDPQRSPSSCNDL
sp|Q9UDY2|ZO2_HUMAN_244	R.SphosIDQDYER.A	R.GRSphosIDQDYER.A	-0.77833	-0.225314	13	19	sp|Q9UDY2|ZO2_HUMAN	STYX	CENTER	1	1	0.998	0.997	FGPSRDRDRDRSRGRSIDQDYERAYHRAYDP
sp|Q9ULD4|BRPF3_HUMAN_645	K.LESphosHLYR.T	K.LESphosHLYR.T	-0.77833	0.149535	3	3	sp|Q9ULD4|BRPF3_HUMAN	STYX	CENTER	0.9824	0.9834	0.996	0.996	ISKPMDFSTMRRKLESHLYRTLEEFEEDFNL
sp|Q9UQ35|SRRM2_HUMAN_1326	R.ENSphosFGSPLEFR.N	R.ENSphosFGSPLEFR.N	-0.77833	0.0415435	23	10	sp|Q9UQ35|SRRM2_HUMAN	STYX	CENTER	1	0.9999	0.997	0.996	SPEHKELSNSPLRENSFGSPLEFRNSGPLGT
sp|Q9UQ35|SRRM2_HUMAN_1329	S.FGSphosPLEFR.N	R.ENSFGSphosPLEFR.N	-0.77833	-0.0326684	56	56	sp|Q9UQ35|SRRM2_HUMAN	STYX	CENTER	1	1	1	0.997	HKELSNSPLRENSFGSPLEFRNSGPLGTEMN
sp|Q9UQ35|SRRM2_HUMAN_1974 1975_C	R.SR(TS)phosPITR.R	R.SR(TS)phosPITR.R	-0.77833	0.0612492	3	4	sp|Q9UQ35|SRRM2_HUMAN	STYX	CENTER	0.9639	0.996	0.992	0.991	RSRTPPVTRRRSRSRTSPITRRRSRSRTSPV SRTPPVTRRRSRSRTSPITRRRSRSRTSPVT
sp|Q9UQ35|SRRM2_HUMAN_2692	R.SLSphosYSPVER.R	R.SLSphosYSPVER.R	-0.77833	0.0870708	7	2	sp|Q9UQ35|SRRM2_HUMAN	STYX	CENTER	0.9995	0.9996	0.99	0.99	SPRKPIDSLRDSRSLSYSPVERRRPSPQPSP
sp|Q9Y2H5|PKHA6_HUMAN_448	R.RLSphosLQPR.S	R.RLSphosLQPR.S	-0.77833	0.255577	1	1	sp|Q9Y2H5|PKHA6_HUMAN	STYX	CENTER	0.9823	0.9096	1	1	YYDELDAASSSLRRLSLQPRSHSVPRSPSQG
tr|B4DR80|B4DR80_HUMAN_4 8	M.AHSphosPVQSphosGLPGMQNLK.A	M.AHSphosPVQSphosGLPGMQNLK.A	-0.77833	-0.603825	1	1	tr|B4DR80|B4DR80_HUMAN	STYX	CENTER	0.9968	0.9711	1	1	____________MAHSPVQSGLPGMQNLKAD ________MAHSPVQSGLPGMQNLKADPEEL
tr|E7EX44|E7EX44_HUMAN_196	K.RGSphosIGENQGEEK.G	K.RGSphosIGENQGEEK.G	-0.77833	-0.0606828	9	13	tr|E7EX44|E7EX44_HUMAN	STYX	CENTER	1	1	1	1	DKEKEEEEEEKPKRGSIGENQGEEKGTKVQA
tr|E9PCW1|E9PCW1_HUMAN_49	R.RDSphosSDTTPLLNGSSQDR.M	R.RDSphosSDTTPLLNGSSQDR.M	-0.77833	-0.193949	3	5	tr|E9PCW1|E9PCW1_HUMAN	STYX	CENTER	0.9964	0.9998	0.987	0.991	CTSYSHSSTRDGRRDSSDTTPLLNGSSQDRM
sp|Q8IWX8|CHERP_HUMAN_857	K.MGWSGSphosGGLGAK.E	K.MGWSGSphosGGLGAK.E	-0.778105	-0.0748967	2	1	sp|Q8IWX8|CHERP_HUMAN	STYX	CENTER	0.9997	0.9996	0.941	0.984	ENKGHQMLVKMGWSGSGGLGAKEQGIQDPIK
sp|P61604|CH10_HUMAN_37	K.GGIMLPEKSphosQGK.V	K.GGIMLPEKSphosQGK.V	-0.77563	-0.366812	4	4	sp|P61604|CH10_HUMAN	STYQ	CENTER	0.9989	0.9995	1	1	AAETVTKGGIMLPEKSQGKVLQATVVAVGSG
sp|Q8WVR3|MA11_HUMAN_533	R.SGSphosVMER.R	R.SGSphosVMER.R	-0.774732	-0.162853	4	2	sp|Q8WVR3|MA11_HUMAN	STYX	CENTER	0.9964	0.9953	0.993	0.986	FSHQQPSRSHLMRSGSVMERRAITPPVASPV
sp|Q8N4L1|T151A_HUMAN_423	R.SLSphosGGPLGR.R	R.SLSphosGGPLGR.R	-0.77406	-0.375556	2	1	sp|Q8N4L1|T151A_HUMAN	STYX	CENTER	0.9985	0.9887	0.993	0.963	LGAGGRATPGVFRSLSGGPLGRRGEDTEPLE
sp|Q9H0E9|BRD8_HUMAN_258	N.TVAASphosPAASGAPTLSR.L	N.TVAASphosPAASGAPTLSR.L	-0.770037	0.104981	6	4	sp|Q9H0E9|BRD8_HUMAN	STYX	CENTER	1	1	0.998	0.997	IHGGEIQQTPNTVAASPAASGAPTLSRLLEA
sp|O95292|VAPB_HUMAN_158 159 160_C	K.SL(SSS)phosLDDTEVK.K	K.SL(SSS)phosLDDTEVKK.V	-0.769592	-0.273677	10	8	sp|O95292|VAPB_HUMAN	STYX	CENTER	1	1	1	1	TTASKTETPIVSKSLSSSLDDTEVKKVMEEC TASKTETPIVSKSLSSSLDDTEVKKVMEECK ASKTETPIVSKSLSSSLDDTEVKKVMEECKR
sp|Q15648|MED1_HUMAN_1433	K.NYGSphosPLISGSTPK.H	K.NYGSphosPLISGSTPK.H	-0.769592	-0.125797	8	8	sp|Q15648|MED1_HUMAN	STYX	CENTER	0.9997	0.9999	0.997	0.997	GEGLRPQMASSKNYGSPLISGSTPKHERGSP
sp|Q86V48|LUZP1_HUMAN_569 570_C	K.AIGALA(SS)phosR.R	K.AIGALA(SS)phosR.R	-0.769592	-0.583361	2	1	sp|Q86V48|LUZP1_HUMAN	STYX	CENTER	0.9975	0.9967	1	1	QAANSGCSKAIGALASSRRSSSEGLSKGKKA AANSGCSKAIGALASSRRSSSEGLSKGKKAA
sp|O95218|ZRAB2_HUMAN_114	R.ENVEYphosIEREESDGEYDEFGR.K	R.ENVEYphosIEREESDGEYDEFGRK.K	-0.769369	-0.0128033	2	8	sp|O95218|ZRAB2_HUMAN	STYX	CENTER	0.9999	1	0.51	0.852	RTGYGGGFNERENVEYIEREESDGEYDEFGR
sp|Q8N1G0|ZN687_HUMAN_900	K.GAGGALLTphosPK.T	K.GAGGALLTphosPK.T	-0.769369	0.173782	6	1	sp|Q8N1G0|ZN687_HUMAN	STYX	CENTER	1	0.9998	1	1	RLEETAGKGAGGALLTPKTEPEELAVSQGGA
sp|Q96RF0|SNX18_HUMAN_202	R.SDLSphosLGSR.G	R.SDLSphosLGSR.G	-0.769369	-0.257375	4	3	sp|Q96RF0|SNX18_HUMAN	STYX	CENTER	0.9954	0.9928	0.995	0.992	VGAAGRYRLSTRSDLSLGSRGGSVPPQHHPS
sp|Q9BWT3|PAPOG_HUMAN_525	K.RLSphosLDSSCLDSSR.D	K.RLSphosLDSSCLDSSR.D	-0.769369	0.31673	14	18	sp|Q9BWT3|PAPOG_HUMAN	STYX	CENTER	1	1	0.997	0.995	SDVNRSSGGLQSKRLSLDSSCLDSSRDTDNG
sp|Q9C0C2|TB182_HUMAN_429	R.FSphosEGVLQSPSQDQEK.L	R.RFSphosEGVLQSPSQDQEK.L	-0.769369	0.106082	22	24	sp|Q9C0C2|TB182_HUMAN	STYX	CENTER	1	1	0.999	0.998	GDAHLRPTSLVQRRFSEGVLQSPSQDQEKLG
sp|Q86TJ2|TAD2B_HUMAN_17	Y.CLAEVSphosPLR.F	Y.CLAEVSphosPLR.F	-0.764377	-0.0466076	4	2	sp|Q86TJ2|TAD2B_HUMAN	STYX	CENTER	0.9921	0.9919	1	1	AELGKKYCVYCLAEVSPLRFRCTECQDIELC
sp|Q8IWZ3|ANKH1_HUMAN_803	K.SphosLELIQGEPLNK.D	K.SphosLELIQGEPLNK.D	-0.764046	0.266892	2	1	sp|Q8IWZ3|ANKH1_HUMAN	STYX	CENTER	0.9994	0.9998	1	1	ELGQRISAIEKAQLKSLELIQGEPLNKDKIE
sp|Q9UHR4|BI2L1_HUMAN_257	K.TPASTPVSGTphosPQASPMIER.S	K.TPASTPVSGTphosPQASPMIER.S	-0.763604	-0.0466076	4	12	sp|Q9UHR4|BI2L1_HUMAN	STYX	CENTER	0.9969	0.9994	0.994	0.995	MIEEIKTPASTPVSGTPQASPMIERSNVVRK
sp|Q8NF99|ZN397_HUMAN_142	R.EFDDPGQQVPASphosPQGPAVPWK.D	R.EFDDPGQQVPASphosPQGPAVPWK.D	-0.761398	-0.133195	4	7	sp|Q8NF99|ZN397_HUMAN	STYX	CENTER	0.9999	1	1	1	DLEREFDDPGQQVPASPQGPAVPWKDLTCLR
sp|P25787|PSA2_HUMAN_222	R.RLTphosPTEVK.D	R.RLTphosPTEVK.D	-0.760848	0.52428	2	3	sp|P25787|PSA2_HUMAN	STYX	CENTER	0.9991	0.9998	0.974	0.99	NIEVGICNEAGFRRLTPTEVKDYLAAIA___
sp|Q09666|AHNK_HUMAN_5589	K.GGADVSGGVSAPDISLGEGHLSphosVK.G	K.GGADVSGGVSAPDISLGEGHLSphosVK.G	-0.760848	-0.323717	2	3	sp|Q09666|AHNK_HUMAN	STYX	CENTER	1	1	0.998	0.997	GGVSAPDISLGEGHLSVKGSGGEWKGPQVSS
sp|P22314|UBA1_HUMAN_21	R.VSGPDPKPGSphosNCSPAQSVLSEVPSVPTNGMAK.N	R.VSGPDPKPGSphosNCSPAQSVLSEVPSVPTNGMAK.N	-0.760518	0.178774	4	4	sp|P22314|UBA1_HUMAN	STYX	CENTER	0.9936	0.9944	0.955	0.923	LSKKRRVSGPDPKPGSNCSPAQSVLSEVPSV
sp|P25440|BRD2_HUMAN_37	R.KPSphosLLYEGF.E	R.IRKPSphosLLYEGFESPTMASVPALQLTPANPPPPEVSNPK.K	-0.760518	0.411541	26	28	sp|P25440|BRD2_HUMAN	STYX	CENTER	1	0.9999	0.997	0.998	LGPEAAAPGKRIRKPSLLYEGFESPTMASVP
sp|Q5VTL8|PR38B_HUMAN_527 529	R.RRSphosQSphosIEQESQEK.Q	R.RRSphosQSphosIEQESQEK.Q	-0.760518	-0.202254	2	2	sp|Q5VTL8|PR38B_HUMAN	STYQ	CENTER	1	0.9998	0.998	0.997	HSDSKDQSDKHDRRRSQSIEQESQEKQHKNK DSKDQSDKHDRRRSQSIEQESQEKQHKNKDE
sp|Q6PID6|TTC33_HUMAN_197	K.SEAPAEVTHFSphosPK.S	K.KSEAPAEVTHFSphosPK.S	-0.760518	0.561513	20	25	sp|Q6PID6|TTC33_HUMAN	STYX	CENTER	1	1	0.997	0.997	QRIKKSEAPAEVTHFSPKSIPDYDFESDEIV
sp|Q8WVV9|HNRLL_HUMAN_35	K.TEEGEIDYSphosAEEGENRR.E	K.TEEGEIDYSphosAEEGENR.R	-0.760518	-0.103752	2	1	sp|Q8WVV9|HNRLL_HUMAN	STYX	CENTER	1	1	0.987	0.965	SQAKRLKTEEGEIDYSAEEGENRREATPRGG
sp|O00267|SPT5H_HUMAN_791	R.TPMYGSQTphosPLQDGSR.T	R.TPMYGSQTphosPLQDGSR.T	-0.760408	0.671977	1	2	sp|O00267|SPT5H_HUMAN	STYX	Q1	0.9942	0.9981	0.938	0.988	PMYGSGSRTPMYGSQTPLQDGSRTPHYGSQT
sp|Q9H9A7|RMI1_HUMAN_284 292	R.QSSphosFEPEFVISphosPRPK.E	R.QSSphosFEPEFVISphosPRPK.E	-0.760408	1.49089	5	7	sp|Q9H9A7|RMI1_HUMAN	STYX	Q1	1	1	0.977	0.973	FTTGSSSNTIPTRQSSFEPEFVISPRPKEEP TIPTRQSSFEPEFVISPRPKEEPSNLSIHVM
sp|Q86UU1|PHLB1_HUMAN_583	K.NSITEISphosDNEDDLLEYHRR.Q	K.NSITEISphosDNEDDLLEYHRR.Q	-0.760408	-2.32943	1	2	sp|Q86UU1|PHLB1_HUMAN	STYX	Q4	0.999	0.9992	0.935	0.863	RVPVTRERKNSITEISDNEDDLLEYHRRQRQ
sp|Q86V48|LUZP1_HUMAN_440 441_C	K.ASHMGV(ST)phosDSGTQETK.K	K.ASHMGV(ST)phosDSGTQETK.K	-0.760408	-0.900218	3	1	sp|Q86V48|LUZP1_HUMAN	STYX	Q4	0.9996	0.9855	0.997	0.998	SFTNRRAAKASHMGVSTDSGTQETKKTEDRF FTNRRAAKASHMGVSTDSGTQETKKTEDRFV
sp|Q9HAU0|PKHA5_HUMAN_435 436_C	R.GVI(SY)phosQTLPR.N	R.GVI(SY)phosQTLPR.N	-0.760408	-0.875127	1	1	sp|Q9HAU0|PKHA5_HUMAN	STYQ	Q4	0.9839	0.9993	0.544	0.502	IQKGRGHEEETRGVISYQTLPRNMPSHRAQI QKGRGHEEETRGVISYQTLPRNMPSHRAQIM
sp|Q9UHB6|LIMA1_HUMAN_507	K.VGVLAASphosMEAK.A	K.VGVLAASphosMEAK.A	-0.760408	-1.03267	3	1	sp|Q9UHB6|LIMA1_HUMAN	STYX	Q4	0.9992	0.9999	1	1	GVEDAPIAKVGVLAASMEAKASSQQEKEDKP
sp|O43933|PEX1_HUMAN_1181	R.TASphosQEGCQELTQEQR.D	R.TASphosQEGCQELTQEQR.D	-0.760408	0.0613077	3	8	sp|O43933|PEX1_HUMAN	STYQ	CENTER	1	1	0.991	0.99	GKDQLFSQPPVLRTASQEGCQELTQEQRDQL
sp|O60293|ZC3H1_HUMAN_510	R.SphosLDKQPTDSGGGIY.Q	R.SphosLDKQPTDSGGGIY.Q	-0.760408	0.401309	1	2	sp|O60293|ZC3H1_HUMAN	STYX	CENTER	0.9318	1	0.995	0.964	KRRSRSKSSDPDLRRSLDKQPTDSGGGIYQY
sp|O60716|CTND1_HUMAN_268 269_C	R.VGG(SS)phosVDLHR.F	R.VGG(SS)phosVDLHR.F	-0.760408	0.221088	3	4	sp|O60716|CTND1_HUMAN	STYX	CENTER	0.9996	0.9999	1	1	RQDVYGPQPQVRVGGSSVDLHRFHPEPYGLE QDVYGPQPQVRVGGSSVDLHRFHPEPYGLED
sp|O60716|CTND1_HUMAN_861 862_C	R.SQ(SS)phosHSYDDSTLPLIDR.N	R.SQ(SS)phosHSYDDSTLPLIDR.N	-0.760408	-0.183763	8	2	sp|O60716|CTND1_HUMAN	STYX	CENTER	0.9973	0.9953	0.998	0.98	KSDFQVNLNNASRSQSSHSYDDSTLPLIDRN SDFQVNLNNASRSQSSHSYDDSTLPLIDRNQ
sp|O94811|TPPP_HUMAN_32	K.RLSphosLESEGAGEGAAASPELSAL.E	K.RLSphosLESEGAGEGAAASPELSALEEAFRR.F	-0.760408	0.0217793	16	3	sp|O94811|TPPP_HUMAN	STYX	CENTER	1	1	0.997	0.499	KSPGDPSKDRAAKRLSLESEGAGEGAAASPE
sp|O95297|MPZL1_HUMAN_206	R.DYTGCSTSphosESLSPVK.Q	R.DYTGCSTSphosESLSPVK.Q	-0.760408	-0.193949	3	1	sp|O95297|MPZL1_HUMAN	STYX	CENTER	0.9965	0.9982	0.99	0.97	YRRKNSKRDYTGCSTSESLSPVKQAPRKSPS
sp|P02545|LMNA_HUMAN_463	K.SNEDQSphosMGNWQIKR.Q	K.SNEDQSphosMGNWQIK.R	-0.760408	-0.0748967	2	9	sp|P02545|LMNA_HUMAN	STYX	CENTER	1	1	0.995	0.997	EGKFVRLRNKSNEDQSMGNWQIKRQNGDDPL
sp|P05114|HMGN1_HUMAN_7 8_C	R.KV(SS)phosAEGAAK.E	R.KV(SS)phosAEGAAKEEPK.R	-0.760408	0.155314	13	6	sp|P05114|HMGN1_HUMAN	STYX	CENTER	1	1	1	1	_________MPKRKVSSAEGAAKEEPKRRSA ________MPKRKVSSAEGAAKEEPKRRSAR
sp|P07948|LYN_HUMAN_397	R.VIEDNEYphosTAR.E	R.VIEDNEYphosTAR.E	-0.760408	0.0870708	6	7	sp|P07948|LYN_HUMAN	STYX	CENTER	0.9998	1	0.951	0.952	KIADFGLARVIEDNEYTAREGAKFPIKWTAP
sp|P42694|HELZ_HUMAN_1741	R.TVSSSSphosLPSLEEYEPR.G	R.TVSSSSphosLPSLEEYEPR.G	-0.760408	0.16171	1	3	sp|P42694|HELZ_HUMAN	STYX	CENTER	0.998	0.997	0.963	0.959	QEPFHPLSSRTVSSSSLPSLEEYEPRGPGRP
sp|P50749|RASF2_HUMAN_145	R.TRSphosDVGVR.R	R.TRSphosDVGVR.R	-0.760408	0.112382	3	3	sp|P50749|RASF2_HUMAN	STYX	CENTER	0.9941	0.9978	0.964	0.967	LKPLQEDTPQLMRTRSDVGVRRRGNVRTPSD
sp|P51572|BAP31_HUMAN_216	R.KQSphosEGLTK.E	R.KQSphosEGLTK.E	-0.760408	0.0350762	1	1	sp|P51572|BAP31_HUMAN	STYX	CENTER	0.9959	0.9597	0.997	0.931	KLEKAENQVLAMRKQSEGLTKEYDRLLEEHA
sp|P51991|ROA3_HUMAN_112	R.AVSphosREDSVKPGAHLTVK.K	R.AVSphosREDSVKPGAHLTVK.K	-0.760408	0.104429	1	2	sp|P51991|ROA3_HUMAN	STYX	CENTER	0.9999	1	0.981	0.85	PHKVDGRVVEPKRAVSREDSVKPGAHLTVKK
sp|P54646|AAPK2_HUMAN_176	R.TSCGSphosPNYAAPEVISGR.L	R.TSCGSphosPNYAAPEVISGR.L	-0.760408	-0.201916	1	6	sp|P54646|AAPK2_HUMAN	STYX	CENTER	0.9999	1	0.419	0.988	SNMMSDGEFLRTSCGSPNYAAPEVISGRLYA
sp|P60174|TPIS_HUMAN_117	K.VTNGAFTGEISphosPGMIK.D	K.VTNGAFTGEISphosPGMIK.D	-0.760408	0.570673	5	15	sp|P60174|TPIS_HUMAN	STYX	CENTER	1	1	0.995	0.996	QNCYKVTNGAFTGEISPGMIKDCGATWVVLG
sp|P78347|GTF2I_HUMAN_830 831_C	K.IN(SS)phosPNVNTTASGVEDLNIIQVTIPDDDNER.L	R.KIN(SS)phosPNVNTT.A	-0.760408	0.148498	3	2	sp|P78347|GTF2I_HUMAN	STYX	CENTER	0.9967	0.9687	0.998	0.999	IKESTSSKSPPRKINSSPNVNTTASGVEDLN KESTSSKSPPRKINSSPNVNTTASGVEDLNI
sp|Q02952|AKA12_HUMAN_651	K.SATLSSTESTASphosEMQEEMK.G	K.SATLSSTESTASphosEMQEEMK.G	-0.760408	0.00145835	1	8	sp|Q02952|AKA12_HUMAN	STYX	CENTER	0.9984	0.9994	0.782	0.992	DKVKSATLSSTESTASEMQEEMKGSVEEPKP
sp|Q07157|ZO1_HUMAN_175	R.SphosVASSQPAKPTK.V	R.SphosVASSQPAKPTK.V	-0.760408	-0.323817	3	4	sp|Q07157|ZO1_HUMAN	STYX	CENTER	1	1	0.957	0.979	SASRERSLSPRSDRRSVASSQPAKPTKVTLV
sp|Q09161|NCBP1_HUMAN_22	T.SphosDANETEDHLESLICK.V	R.KTSphosDANETEDHLESLICKVG.E	-0.760408	0.0997818	85	69	sp|Q09161|NCBP1_HUMAN	STYX	CENTER	1	1	0.997	0.984	SDENDGGQPHKRRKTSDANETEDHLESLICK
sp|Q13796|SHRM2_HUMAN_1036	R.AQSphosPGSPLHAR.G	R.AQSphosPGSPLHAR.G	-0.760408	-0.0820743	3	6	sp|Q13796|SHRM2_HUMAN	STYX	CENTER	0.9998	1	0.998	0.998	YSEESTPADLGPRAQSPGSPLHARGQDSWPV
sp|Q14149|MORC3_HUMAN_560 561_C	R.RL(SS)phosQFENS.V	R.RL(SS)phosQFENSVYK.G	-0.760408	-0.00621564	7	2	sp|Q14149|MORC3_HUMAN	STYQ	CENTER	0.9922	1	1	0.999	LSTRSSILNAKNRRLSSQFENSVYKGDDDDE STRSSILNAKNRRLSSQFENSVYKGDDDDED
sp|Q2PPJ7|RGPA2_HUMAN_696	R.SFSphosLSWR.S	R.SFSphosLSWR.S	-0.760408	-0.111075	1	8	sp|Q2PPJ7|RGPA2_HUMAN	STYX	CENTER	0.9934	0.9956	0.99	0.99	CVLDPQKGTTVGRSFSLSWRSHPDVTEPMRF
sp|Q4G0F5|VP26B_HUMAN_319	R.FEGTTSphosLGEVR.T	R.FEGTTSphosLGEVR.T	-0.760408	-0.00518771	1	1	sp|Q4G0F5|VP26B_HUMAN	STYX	CENTER	0.9998	0.9997	0.975	0.975	SHQAAIASQRFEGTTSLGEVRTPSQLSDNNC
sp|Q5T200|ZC3HD_HUMAN_25	R.RPSphosVFER.L	R.RPSphosVFER.L	-0.760408	0.557463	1	2	sp|Q5T200|ZC3HD_HUMAN	STYX	CENTER	0.9986	0.9988	1	1	VENTKTISDSTSRRPSVFERLGPSTGSTAET
sp|Q5VT52|RPRD2_HUMAN_1099	R.RMSphosGEPIQTVE.S	R.RMSphosGEPIQTVESIR.V	-0.760408	0.221088	68	83	sp|Q5VT52|RPRD2_HUMAN	STYX	CENTER	1	1	0.999	0.999	PIETLGYHSASNRRMSGEPIQTVESIRVPGK
sp|Q6NWY9|PR40B_HUMAN_764	R.GSphosPSSHLLGADHGLR.K	R.GSphosPSSHLLGADHGLR.K	-0.760408	0.0805448	23	22	sp|Q6NWY9|PR40B_HUMAN	STYX	CENTER	1	1	0.995	0.994	LDSVESGGAALGGRGSPSSHLLGADHGLRKA
sp|Q6NZI2|CAVN1_HUMAN_156	K.VMIYphosQDEVKLPAKLSISK.S	K.VMIYphosQDEVKLPAKLSISK.S	-0.760408	-0.0326684	1	1	sp|Q6NZI2|CAVN1_HUMAN	STYQ	CENTER	0.9851	0.9999	0.401	0.499	NEAELLRRRNFKVMIYQDEVKLPAKLSISKS
sp|Q7L4I2|RSRC2_HUMAN_104	R.LNSphosSENGEDR.H	R.LNSphosSENGEDR.H	-0.760408	0.0482515	19	23	sp|Q7L4I2|RSRC2_HUMAN	STYX	CENTER	1	1	0.993	0.992	NDKEHSSDKGRERLNSSENGEDRHKRKERKS
sp|Q7Z401|MYCPP_HUMAN_1225	R.TPSphosIDLQR.A	R.TPSphosIDLQR.A	-0.760408	0.197629	1	5	sp|Q7Z401|MYCPP_HUMAN	STYX	CENTER	0.9994	0.9998	0.968	0.996	MYMNNMSSPLTSRTPSIDLQRACDDKLNKKS
sp|Q86U86|PB1_HUMAN_948	R.TYSphosQDCSFK.N	R.TYSphosQDCSFK.N	-0.760408	0.3058	7	6	sp|Q86U86|PB1_HUMAN	STYQ	CENTER	0.9996	0.9998	0.992	0.994	DSSGAAGLSGLHRTYSQDCSFKNSMYHVGDY
sp|Q8IYB3|SRRM1_HUMAN_10	R.GTSphosAEQDNR.F	R.GTSphosAEQDNR.F	-0.760408	0.184522	3	4	sp|Q8IYB3|SRRM1_HUMAN	STYX	CENTER	0.9942	0.9995	0.993	0.992	______MDAGFFRGTSAEQDNRFSNKQKKLL
sp|Q8N9B5|JMY_HUMAN_888 889_C	R.RV(SS)phosPMDEVLASLK.R	R.RV(SS)phosPMDEVLASLKR.G	-0.760408	0.137257	17	21	sp|Q8N9B5|JMY_HUMAN	STYX	CENTER	1	1	1	1	KKLRKTAEGLQRRRVSSPMDEVLASLKRGSF KLRKTAEGLQRRRVSSPMDEVLASLKRGSFH
sp|Q8NC51|PAIRB_HUMAN_203	R.SSphosFSHYSGLK.H	R.SSphosFSHYSGLK.H	-0.760408	-0.635115	3	4	sp|Q8NC51|PAIRB_HUMAN	STYX	CENTER	0.9999	0.9998	0.951	0.951	RGKREFDRHSGSDRSSFSHYSGLKHEDKRGG
sp|Q8NCN4|RN169_HUMAN_403	R.VLSphosPLIIK.S	R.VLSphosPLIIK.S	-0.760408	-0.0326684	13	5	sp|Q8NCN4|RN169_HUMAN	STYX	CENTER	0.9989	0.9981	1	1	SPCTPPKRLPDGRVLSPLIIKSTPRNLNRSL
sp|Q8TB72|PUM2_HUMAN_587 589 590 591 592_C	R.RESphosL(STSS)phosDLYKR.S	R.RESphosL(STSS)phosDLYK.R	-0.760408	-0.216483	1	2	sp|Q8TB72|PUM2_HUMAN	STYX	CENTER	0.9545	0.997	0.668	0.506	SSVGSSASSSATRRESLSTSSDLYKRSSSSL VGSSASSSATRRESLSTSSDLYKRSSSSLAP GSSASSSATRRESLSTSSDLYKRSSSSLAPI SSASSSATRRESLSTSSDLYKRSSSSLAPIG SASSSATRRESLSTSSDLYKRSSSSLAPIGQ
sp|Q8WVM7|STAG1_HUMAN_1065	R.MSVNSphosGSSSSK.T	R.MSVNSphosGSSSSK.T	-0.760408	-0.172503	3	4	sp|Q8WVM7|STAG1_HUMAN	STYX	CENTER	0.9643	0.9997	0.99	0.993	NSLVTGGEDDRMSVNSGSSSSKTSSVRNKKG
sp|Q92890|UFD1_HUMAN_299	R.FVAFSGEGQSphosLR.K	R.FVAFSGEGQSphosLR.K	-0.760408	-0.277038	13	8	sp|Q92890|UFD1_HUMAN	STYX	CENTER	1	1	0.998	0.991	DEAGGRFVAFSGEGQSLRKKGRKP_______
sp|Q96JM7|LMBL3_HUMAN_625	R.TDANESSSSphosPEIR.D	R.TDANESSSSphosPEIR.D	-0.760408	0.0934263	9	10	sp|Q96JM7|LMBL3_HUMAN	STYX	CENTER	1	1	0.979	0.97	SFPRNKRTDANESSSSPEIRDQHADDVKEDF
sp|Q96TC7|RMD3_HUMAN_212	R.KDSphosLDLEEEAASGA.S	R.KDSphosLDLEEEAASGA.S	-0.760408	-0.0306704	9	2	sp|Q96TC7|RMD3_HUMAN	STYX	CENTER	1	1	0.999	0.999	EDEVSCETVKMGRKDSLDLEEEAASGASSAL
sp|Q99590|SCAFB_HUMAN_405	K.SSSNDSphosVDEETAESDTSPVLEK.E	K.SSSNDSphosVDEETAESDTSPVLEK.E	-0.760408	0.238149	6	8	sp|Q99590|SCAFB_HUMAN	STYX	CENTER	0.999	0.9994	0.998	0.995	LRSSVAAPEKSSSNDSVDEETAESDTSPVLE
sp|Q9BXP5|SRRT_HUMAN_26	R.ERSDYDRSphosR.E	R.ERSDYDRSphosR.E	-0.760408	-0.447706	7	3	sp|Q9BXP5|SRRT_HUMAN	STYX	CENTER	0.9979	0.9917	0.995	0.971	RRRDKFRRERSDYDRSRERDERRRGDDWNDR
sp|Q9H410|DSN1_HUMAN_125	R.SISphosVDLAESK.R	R.SISphosVDLAESK.R	-0.760408	0.0482515	3	5	sp|Q9H410|DSN1_HUMAN	STYX	CENTER	0.9985	0.9998	0.995	0.995	LHPIHQGITELSRSISVDLAESKRLGCLLLS
sp|Q9HC62|SENP2_HUMAN_333	R.LGSphosGSNGLLR.R	R.LGSphosGSNGLLR.R	-0.760408	0.338264	9	4	sp|Q9HC62|SENP2_HUMAN	STYX	CENTER	0.9997	0.9991	0.996	0.994	EPDLSEEVSARLRLGSGSNGLLRRKVSIIET
sp|Q9NY61|AATF_HUMAN_203	R.AGDRNSphosEDDGVVMTF.S	R.AGDRNSphosEDDGVVMTFSSVK.V	-0.760408	0.385833	2	5	sp|Q9NY61|AATF_HUMAN	STYX	CENTER	1	1	1	0.999	DSQGESEEDRAGDRNSEDDGVVMTFSSVKVS
sp|Q9NYF8|BCLF1_HUMAN_385	R.AEGEWEDQEALDYFSphosDKESGK.Q	K.GRAEGEWEDQEALDYFSphosDKESGK.Q	-0.760408	0.0416639	46	22	sp|Q9NYF8|BCLF1_HUMAN	STYX	CENTER	1	1	0.997	0.981	RAEGEWEDQEALDYFSDKESGKQKFNDSEGD
sp|Q9UGU0|TCF20_HUMAN_1019	K.LKMSphosPGR.S	K.LKMSphosPGR.S	-0.760408	-0.292551	5	2	sp|Q9UGU0|TCF20_HUMAN	STYX	CENTER	0.9946	0.9939	1	1	RSPSQYHDFAEKLKMSPGRSRGPGGDPHHMN
sp|Q9UMZ2|SYNRG_HUMAN_1075	R.SLSphosLGDK.E	R.SLSphosLGDK.E	-0.760408	-0.0326684	25	24	sp|Q9UMZ2|SYNRG_HUMAN	STYX	CENTER	0.9999	0.9999	0.995	0.993	ATFDLSVQGSHKRSLSLGDKEISRSSPSPAL
sp|Q9UNX4|WDR3_HUMAN_240	K.IKGSphosSPGIQDTLEAEDGAFETDEAPEDR.L	K.IKGSphosSPGIQDTLEAEDGAFETDEAPEDR.L	-0.760408	-0.41118	1	1	sp|Q9UNX4|WDR3_HUMAN	STYX	CENTER	1	1	0.934	0.941	EIEDPEEPDPKKIKGSSPGIQDTLEAEDGAF
sp|Q9UQ35|SRRM2_HUMAN_1822	R.GGSGYHSphosRSPAR.Q	R.GGSGYHSphosRSPAR.Q	-0.760408	-0.323717	1	1	sp|Q9UQ35|SRRM2_HUMAN	STYX	CENTER	0.9994	0.9997	0.379	0.331	RSRVTRRRRGGSGYHSRSPARQESSRTSSRR
sp|Q9UQ35|SRRM2_HUMAN_1824	R.GGSGYHSRSphosPAR.Q	R.GGSGYHSRSphosPAR.Q	-0.760408	-0.290165	1	1	sp|Q9UQ35|SRRM2_HUMAN	STYX	CENTER	0.9985	0.9983	0.457	0.676	RVTRRRRGGSGYHSRSPARQESSRTSSRRRR
sp|Q9Y4B4|ARIP4_HUMAN_1421	R.GMSIYPGYMSphosPHAGYPAGGLLR.S	R.GMSIYPGYMSphosPHAGYPAGGLLR.S	-0.760408	0.52428	1	1	sp|Q9Y4B4|ARIP4_HUMAN	STYX	CENTER	0.9949	0.9945	0.92	0.938	PSNLSRGMSIYPGYMSPHAGYPAGGLLRSQV
sp|Q9Y618|NCOR2_HUMAN_1479	R.SLIGSphosPGR.T	R.SLIGSphosPGR.T	-0.760408	0.0547796	1	6	sp|Q9Y618|NCOR2_HUMAN	STYX	CENTER	0.9927	0.9963	0.997	0.996	STTGSKKHDVRSLIGSPGRTFPPVHPLDVMA
tr|I3L2J0|I3L2J0_HUMAN_768	R.AVSphosPAVPFSR.S	R.AVSphosPAVPFSR.S	-0.760408	0.406407	5	10	tr|I3L2J0|I3L2J0_HUMAN	STYX	CENTER	0.9996	0.9998	0.998	0.998	SHTPTPSTPAGFRAVSPAVPFSRSRQPSPLL
sp|Q8N556|AFAP1_HUMAN_548	R.TGSphosNAAQYK.Y	R.TGSphosNAAQYK.Y	-0.758322	-0.421625	4	4	sp|Q8N556|AFAP1_HUMAN	STYX	CENTER	0.9983	0.9997	0.995	0.992	QPKKADPAAVVKRTGSNAAQYKYGKNRVEAD
sp|Q86X29|LSR_HUMAN_432	R.AMSphosEVTSLHEDDWR.S	R.AMSphosEVTSLHEDDWR.S	-0.757665	0.209406	2	3	sp|Q86X29|LSR_HUMAN	STYX	CENTER	1	1	0.998	0.998	PSRPGPPSGRVERAMSEVTSLHEDDWRSRPS
sp|P55265|DSRAD_HUMAN_599	K.TAESphosQTPTPSATSFFSGK.S	K.TAESphosQTPTPSATSFFSGK.S	-0.753733	0.396175	2	17	sp|P55265|DSRAD_HUMAN	STYQ	CENTER	0.9929	0.9996	0.48	0.897	SSHYSTEKESEKTAESQTPTPSATSFFSGKS
sp|Q13435|SF3B2_HUMAN_343 344_C	R.GV(SS)phosESSGDREK.D	R.GV(SS)phosESSGDREK.D	-0.753515	0.311286	4	3	sp|Q13435|SF3B2_HUMAN	STYX	CENTER	0.998	0.9976	0.998	0.998	RNRKKKKKPQRVRGVSSESSGDREKDSTRSR NRKKKKKPQRVRGVSSESSGDREKDSTRSRG
sp|Q15149|PLEC_HUMAN_4672 4673_C	R.RYASG(SS)phosASLGGPESAVA.-	R.RYASG(SS)phosASLGGPESAVA.-	-0.753406	0.343707	2	7	sp|Q15149|PLEC_HUMAN	STYX	CENTER	0.9977	0.9989	0.866	0.924	SSYSSSGYGRRYASGSSASLGGPESAVA___ SYSSSGYGRRYASGSSASLGGPESAVA____
sp|Q96IZ7|RSRC1_HUMAN_61	R.SHSphosYDRR.R	R.SHSphosYDRR.R	-0.752862	-0.0606828	2	3	sp|Q96IZ7|RSRC1_HUMAN	STYX	CENTER	0.9953	0.9932	0.987	0.991	SKSRSWSRDLQPRSHSYDRRRRHRSSSSSSY
sp|Q08AD1|CAMP2_HUMAN_844	R.SKSphosLADIK.E	R.SKSphosLADIK.E	-0.752209	0.497152	2	6	sp|Q08AD1|CAMP2_HUMAN	STYX	CENTER	0.9753	0.9999	0.985	0.985	AKEKESQKTDGQRSKSLADIKESMENPQAKW
sp|O15516|CLOCK_HUMAN_181	K.ILSTHLLESDSLTphosPEYLK.S	K.ILSTHLLESDSLTphosPEYLK.S	-0.751775	1.16242	4	2	sp|O15516|CLOCK_HUMAN	STYX	Q1	1	0.9999	0.995	0.906	VYKILSTHLLESDSLTPEYLKSKNQLEFCCH
sp|Q8NAV1|PR38A_HUMAN_226	R.DLDKPRRSphosPTLR.Y	R.DLDKPRRSphosPTLR.Y	-0.751775	-0.645645	10	7	sp|Q8NAV1|PR38A_HUMAN	STYX	CENTER	0.9996	0.9999	0.997	0.995	DHRRRSYRDLDKPRRSPTLRYRRSRSRSPRR
sp|Q7Z2K8|GRIN1_HUMAN_75	R.SPSphosGAGEGASCSDGPR.G	R.SPSphosGAGEGASCSDGPR.G	-0.751557	0.43179	2	10	sp|Q7Z2K8|GRIN1_HUMAN	STYX	CENTER	1	1	0.997	0.998	TPDQSPGMESRHRSPSGAGEGASCSDGPRGS
sp|Q8NC51|PAIRB_HUMAN_330	K.SKSphosEEAHAEDSVMDH.H	K.SKSphosEEAHAEDSVMDHHFR.K	-0.751557	0.0217793	12	5	sp|Q8NC51|PAIRB_HUMAN	STYX	CENTER	1	1	0.991	0.974	ADGQWKKGFVLHKSKSEEAHAEDSVMDHHFR
sp|Q96S55|WRIP1_HUMAN_75	R.RLSphosESSALK.Q	R.RLSphosESSALK.Q	-0.751557	0.272505	12	16	sp|Q96S55|WRIP1_HUMAN	STYX	CENTER	0.9997	0.9996	0.995	0.985	RAKGPSPPGAKRRRLSESSALKQPATPTAAE
sp|P61978|HNRPK_HUMAN_39	R.SRNTphosDEMVELR.L	R.SRNTphosDEMVELR.L	-0.750689	-0.257375	8	8	sp|P61978|HNRPK_HUMAN	STYX	CENTER	0.9999	1	0.994	0.988	AEDMEEEQAFKRSRNTDEMVELRILLQSKNA
sp|Q9H425|CA198_HUMAN_175	R.SSSphosLDALGPTR.K	R.SSSphosLDALGPTR.K	-0.750689	0.476345	2	3	sp|Q9H425|CA198_HUMAN	STYX	CENTER	0.9997	0.9998	0.987	0.989	QGSQALKSSQGSRSSSLDALGPTRKEEEASF
sp|Q92597|NDRG1_HUMAN_328	R.SRTphosASGSSVTSLDGTR.S	R.SRTphosASGSSVTSLDGTR.S	-0.74604	0.149068	4	4	sp|Q92597|NDRG1_HUMAN	STYX	CENTER	0.9971	0.9993	0.989	0.988	GYMPSASMTRLMRSRTASGSSVTSLDGTRSR
sp|Q71F56|MD13L_HUMAN_400	R.SQMSTPTphosLEEEPASNPATWDFVDPTQR.V	R.SQMSTPTphosLEEEPASNPATWDFVDPTQR.V	-0.744425	0.112382	6	7	sp|Q71F56|MD13L_HUMAN	STYX	CENTER	0.998	0.9976	0.98	0.957	ILNRTQSKRSQMSTPTLEEEPASNPATWDFV
sp|O95785|WIZ_HUMAN_1127	R.SphosPSDLHISPLAK.K	R.SphosPSDLHISPLAK.K	-0.743672	0.266892	2	2	sp|O95785|WIZ_HUMAN	STYX	CENTER	1	1	0.873	0.655	KMMGGAGPGSSLEARSPSDLHISPLAKKLPP
sp|Q8WWY3|PRP31_HUMAN_439 440_C	K.QSVVYGGK(ST)phosIR.D	K.QSVVYGGK(ST)phosIR.D	-0.743672	-0.0466076	4	1	sp|Q8WWY3|PRP31_HUMAN	STYX	CENTER	0.9998	0.9954	0.949	0.732	LQRTLQKQSVVYGGKSTIRDRSSGTASSVAF QRTLQKQSVVYGGKSTIRDRSSGTASSVAFT
sp|Q9H2H9|S38A1_HUMAN_54 56	R.SLTphosNSphosHLEK.K	R.SLTphosNSphosHLEK.K	-0.743672	-0.0329353	4	8	sp|Q9H2H9|S38A1_HUMAN	STYX	CENTER	0.9967	0.9955	0.861	0.924	INSKFISDRESRRSLTNSHLEKKKCDEYIPG SKFISDRESRRSLTNSHLEKKKCDEYIPGTT
sp|P43243|MATR3_HUMAN_604	R.SYSPDGKESphosPSDKK.S	R.SYSPDGKESphosPSDKK.S	-0.743136	-0.193949	2	1	sp|P43243|MATR3_HUMAN	STYX	CENTER	0.9934	0.9998	0.978	0.982	KDKSRKRSYSPDGKESPSDKKSKTDGSQKTE
sp|Q2TAK8|PWP3A_HUMAN_235	K.ASLCLNGSSLSphosEDDTERDMGSK.G	K.ASLCLNGSSLSphosEDDTER.D	-0.743136	0.332981	2	1	sp|Q2TAK8|PWP3A_HUMAN	STYX	CENTER	0.9841	0.9999	0.991	0.912	NSAQKASLCLNGSSLSEDDTERDMGSKGGSW
sp|Q68DK7|MSL1_HUMAN_126	K.QAGIGGEPAAAGAGCSphosPRPK.Y	K.QAGIGGEPAAAGAGCSphosPRPK.Y	-0.743136	0.0217793	4	16	sp|Q68DK7|MSL1_HUMAN	STYX	CENTER	1	1	1	1	QAGIGGEPAAAGAGCSPRPKYQAVLPIQTGS
sp|Q9H019|MFR1L_HUMAN_238	K.ASSphosFADMMGILK.D	K.ASSphosFADMMGILK.D	-0.743136	0.0434065	6	4	sp|Q9H019|MFR1L_HUMAN	STYX	CENTER	1	1	0.987	0.993	SSSEEDDCVSLSKASSFADMMGILKDFHRMK
sp|O15062|ZBTB5_HUMAN_371	K.IDLSphosPESSDR.S	K.IDLSphosPESSDR.S	-0.742814	0.260968	2	4	sp|O15062|ZBTB5_HUMAN	STYX	CENTER	0.9994	0.9999	0.996	0.996	VEVEGVVVSAEKIDLSPESSDRSFSDPQSST
sp|O43166|SI1L1_HUMAN_1632 1633 1634_C	R.RP(SYT)phosLGMK.S	R.RP(SYT)phosLGMK.S	-0.742814	0.00835882	6	7	sp|O43166|SI1L1_HUMAN	STYX	CENTER	0.9997	0.9999	1	1.001	STYPSLPKSLPLRRPSYTLGMKSLHGEFSAS TYPSLPKSLPLRRPSYTLGMKSLHGEFSASD YPSLPKSLPLRRPSYTLGMKSLHGEFSASDS
sp|P02545|LMNA_HUMAN_107	R.LQLELSphosKVR.E	R.LQLELSphosKVR.E	-0.742814	-0.089252	14	5	sp|P02545|LMNA_HUMAN	STYX	CENTER	0.9995	0.999	1	1	LDSVAKERARLQLELSKVREEFKELKARNTK
sp|Q08357|S20A2_HUMAN_316	R.ALSphosMTHGSVK.S	R.ALSphosMTHGSVK.S	-0.742814	0.616461	2	2	sp|Q08357|S20A2_HUMAN	STYX	CENTER	0.9996	0.9857	0.994	0.94	TSAGSHPRAAYGRALSMTHGSVKSPISNGTF
sp|Q8WUA4|TF3C2_HUMAN_901	R.RPGFSphosPTSHR.L	R.RPGFSphosPTSHR.L	-0.742814	0.0217793	12	22	sp|Q8WUA4|TF3C2_HUMAN	STYX	CENTER	0.9998	1	0.991	0.996	NAMFQPSSPTRRPGFSPTSHRLLPTP_____
sp|Q8WVC0|LEO1_HUMAN_162	K.IQNSphosDDEER.A	K.IQNSphosDDEER.A	-0.742814	0.0613077	2	1	sp|Q8WVC0|LEO1_HUMAN	STYX	CENTER	0.9939	0.9998	1	1	REDKSDQSDDEKIQNSDDEERAQGSDEDKLQ
sp|Q9BXF6|RFIP5_HUMAN_176	R.NNLSASphosMFDLSMK.D	R.NNLSASphosMFDLSMK.D	-0.742814	-0.41118	4	2	sp|Q9BXF6|RFIP5_HUMAN	STYX	CENTER	1	1	0.991	0.987	EIEVTIQFTRNNLSASMFDLSMKDKPRSPFS
sp|Q9C0H5|RHG39_HUMAN_604	R.AFSphosEDEALAQQENR.H	R.AFSphosEDEALAQQENR.H	-0.742814	0.481366	4	4	sp|Q9C0H5|RHG39_HUMAN	STYX	CENTER	1	1	1	1	GALPLPMPGPVVRAFSEDEALAQQENRHWRR
sp|Q9BX63|FANCJ_HUMAN_1001	K.RVSphosWSSFNSL.G	K.RVSphosWSSFNSLGQYFTGK.L	-0.742706	1.06638	4	4	sp|Q9BX63|FANCJ_HUMAN	STYX	Q1	1	1	0.989	0.993	SRSTSPTFNKQTKRVSWSSFNSLGQYFTGKI
sp|Q9P0V9|SEP10_HUMAN_28	K.TTCMSSQGSphosDDEQIKR.E	C.MSSQGSphosDDEQIKR.E	-0.742706	1.02342	1	2	sp|Q9P0V9|SEP10_HUMAN	STYX	Q1	0.9921	0.9868	0.918	0.803	QSHMATKTTCMSSQGSDDEQIKRENIRSLTM
sp|Q9P2D1|CHD7_HUMAN_2535	R.TSLSphosAEDAEVTK.A	R.TSLSphosAEDAEVTK.A	-0.742706	1.32217	1	1	sp|Q9P2D1|CHD7_HUMAN	STYX	Q1	0.999	0.9998	0.994	0.99	EGLDLLFMSHKRTSLSAEDAEVTKAFEEDIE
sp|O00192|ARVC_HUMAN_335	R.GSMGSphosLDR.L	R.GSMGSphosLDR.L	-0.742706	-0.839565	6	2	sp|O00192|ARVC_HUMAN	STYX	Q4	0.9991	0.9995	0.996	0.996	MVTAPLAQPERGSMGSLDRLVRRSPSVDSAR
sp|P26038|MOES_HUMAN_526	K.ALTphosSELANAR.D	K.ALTphosSELANAR.D	-0.742706	-0.778912	1	2	sp|P26038|MOES_HUMAN	STYX	Q4	0.9921	0.9993	0.95	0.983	EAEKNERVQKHLKALTSELANARDESKKTAN
sp|P57740|NU107_HUMAN_10 11_C	R.SGFGEI(SS)phosPVIR.E	R.SGFGEI(SS)phosPVIR.E	-0.742706	-0.755828	3	3	sp|P57740|NU107_HUMAN	STYX	Q4	1	0.9999	1	0.999	______MDRSGFGEISSPVIREAEVTRTARK _____MDRSGFGEISSPVIREAEVTRTARKQ
sp|Q8IWB9|TEX2_HUMAN_295	R.RLSphosEVIYEPF.Q	R.RLSphosEVIYEPFQLLSK.L	-0.742706	3.00667	9	1	sp|Q8IWB9|TEX2_HUMAN	STYX	NR	1	0.992	0.998	0.719	VPEMEAKIEDTKRRLSEVIYEPFQLLSKIIG
sp|A6H8Y1|BDP1_HUMAN_100	R.ISSphosTSSLVK.S	R.ISSphosTSSLVK.S	-0.742706	0.149535	1	1	sp|A6H8Y1|BDP1_HUMAN	STYX	CENTER	0.9981	0.9992	0.953	0.952	SRSSSTVSQRRKRISSTSSLVKSSVSVPSES
sp|O00472|ELL2_HUMAN_305	R.SESphosPVCSSR.D	R.SESphosPVCSSR.D	-0.742706	0.0742468	1	1	sp|O00472|ELL2_HUMAN	STYX	CENTER	0.915	0.9993	0.994	0.993	KLNPSQNAAGTSRSESPVCSSRDAVSSPQKR
sp|O14579|COPE_HUMAN_99	R.RDSphosIVAELDR.E	R.RDSphosIVAELDR.E	-0.742706	-0.0749674	5	2	sp|O14579|COPE_HUMAN	STYX	CENTER	0.9999	0.9999	1	1	VRMFADYLAHESRRDSIVAELDREMSRSVDV
sp|O14974|MYPT1_HUMAN_299	K.SphosPLIESTANMDNNQSQK.T	R.DKKSphosPLIESTANMDNNQSQK.T	-0.742706	0.0997818	17	10	sp|O14974|MYPT1_HUMAN	STYX	CENTER	1	1	0.999	0.999	QKKQNLLHSEKRDKKSPLIESTANMDNNQSQ
sp|O60293|ZC3H1_HUMAN_1303	R.KPISDNSFSphosSDEEQSTGPIK.Y	R.KPISDNSFSphosSDEEQSTGPIK.Y	-0.742706	0.149535	1	5	sp|O60293|ZC3H1_HUMAN	STYX	CENTER	0.9435	1	0.932	0.984	WKPKFWRKPISDNSFSSDEEQSTGPIKYAFQ
sp|O75369|FLNB_HUMAN_2113	A.TVGSphosICDLNLK.L	R.APSVATVGSphosICDLNLK.L	-0.742706	-0.0188626	3	4	sp|O75369|FLNB_HUMAN	STYX	CENTER	0.9994	1	0.997	0.997	SITRTSRAPSVATVGSICDLNLKIPEINSSD
sp|O75533|SF3B1_HUMAN_488	K.LLVDVDESTLSphosPEEQKER.K	K.LLVDVDESTLSphosPEEQKER.K	-0.742706	0.0514636	5	4	sp|O75533|SF3B1_HUMAN	STYX	CENTER	1	1	0.992	0.986	QYFDKLLVDVDESTLSPEEQKERKIMKLLLK
sp|O95218|ZRAB2_HUMAN_120	R.ENVEYIEREESphosDGEYDEFGR.K	R.ENVEYIEREESphosDGEYDEFGR.K	-0.742706	0.149535	25	30	sp|O95218|ZRAB2_HUMAN	STYX	CENTER	1	1	0.997	0.995	GFNERENVEYIEREESDGEYDEFGRKKKKYR
sp|P05783|K1C18_HUMAN_7 8_C	R.(ST)phosFSTNYR.S	R.(ST)phosFSTNYR.S	-0.742706	0.406443	1	3	sp|P05783|K1C18_HUMAN	STYX	CENTER	0.9978	0.9988	0.87	0.995	_________MSFTTRSTFSTNYRSLGSVQAP ________MSFTTRSTFSTNYRSLGSVQAPS
sp|P11717|MPRI_HUMAN_2400 2401_C	K.AL(SS)phosLHGDDQDSEDEVLTIPEVK.V	K.AL(SS)phosLHGDDQDSEDEVLTIPEVK.V	-0.742706	0.364924	1	1	sp|P11717|MPRI_HUMAN	STYX	CENTER	0.9997	1	0.514	0.557	GQENGHITTKSVKALSSLHGDDQDSEDEVLT QENGHITTKSVKALSSLHGDDQDSEDEVLTI
sp|P16949|STMN1_HUMAN_63	K.SphosHEAEVLK.Q	R.RKSphosHEAEVLK.Q	-0.742706	0.511251	5	8	sp|P16949|STMN1_HUMAN	STYX	CENTER	0.9995	0.9999	1	1	EEIQKKLEAAEERRKSHEAEVLKQLAEKREH
sp|P20810|ICAL_HUMAN_410 411_C	R.(TS)phosMCSIQSAPPEPATLK.G	R.(TS)phosMCSIQSAPPEPATLK.G	-0.742706	0.579775	3	12	sp|P20810|ICAL_HUMAN	STYX	CENTER	1	1	0.998	0.998	SKAAAPAPVSEAVCRTSMCSIQSAPPEPATL KAAAPAPVSEAVCRTSMCSIQSAPPEPATLK
sp|P28290|ITPI2_HUMAN_330	K.ILNVSphosVIEESGNK.N	K.ILNVSphosVIEESGNKNDQK.S	-0.742706	0.00835882	9	1	sp|P28290|ITPI2_HUMAN	STYX	CENTER	1	0.9999	0.998	0.995	SSPSPSAEKGKILNVSVIEESGNKNDQKSQK
sp|P29966|MARCS_HUMAN_170	K.LSGFSphosFK.K	K.LSGFSphosFKK.N	-0.742706	-0.420368	11	4	sp|P29966|MARCS_HUMAN	STYX	CENTER	0.999	0.9996	0.996	0.996	KKRFSFKKSFKLSGFSFKKNKKEAGEGGEAE
sp|P48634|PRC2A_HUMAN_456 457 458_C	R.KQ(SSS)phosEISLAVER.A	R.KQ(SSS)phosEISLAVER.A	-0.742706	0.137257	9	15	sp|P48634|PRC2A_HUMAN	STYX	CENTER	1	1	1	1	APEDEDEAWRQRRKQSSSEISLAVERARRRR PEDEDEAWRQRRKQSSSEISLAVERARRRRE EDEDEAWRQRRKQSSSEISLAVERARRRREE
sp|P55197|AF10_HUMAN_370	K.SSSGSSVQSphosPQDFLSFTDSDLR.N	K.SSSGSSVQSphosPQDFLSFTDSDLR.N	-0.742706	-0.375556	5	3	sp|P55197|AF10_HUMAN	STYX	CENTER	0.9968	0.9953	0.997	0.99	GTPGSVKSSSGSSVQSPQDFLSFTDSDLRND
sp|P61129|ZC3H6_HUMAN_187 188_C	K.ETSNIALG(SS)phosFSK.E	K.ETSNIALG(SS)phosFSK.E	-0.742706	0.52428	1	2	sp|P61129|ZC3H6_HUMAN	STYX	CENTER	0.9992	0.9997	0.984	0.996	KQYRQAKETSNIALGSSFSKESGKKQRMKGV QYRQAKETSNIALGSSFSKESGKKQRMKGVQ
sp|Q13769|THOC5_HUMAN_328	R.RPTphosLGVQLDDK.R	R.RRPTphosLGVQLDDK.R	-0.742706	0.0934263	20	26	sp|Q13769|THOC5_HUMAN	STYX	CENTER	1	1	1	1	DSDAEEEQTTKRRRPTLGVQLDDKRKEMLKR
sp|Q14315|FLNC_HUMAN_2233	R.LGSphosFGSITR.Q	R.LGSphosFGSITR.Q	-0.742706	0.0613077	32	33	sp|Q14315|FLNC_HUMAN	STYX	CENTER	0.9995	0.9998	0.997	0.997	FPAVFGDFLGRERLGSFGSITRQQEGEASSQ
sp|Q6GYQ0|RGPA1_HUMAN_711	K.GVGHEFQKVSphosVDK.S	K.GVGHEFQKVSphosVDK.S	-0.742706	-0.290165	1	3	sp|Q6GYQ0|RGPA1_HUMAN	STYX	CENTER	0.98	0.9992	1	1	KKHKGKGVGHEFQKVSVDKSFSRGWSRDQPG
sp|Q6KC79|NIPBL_HUMAN_243 244_C	R.HG(SS)phosEDYLHMVHR.L	R.HG(SS)phosEDYLHMVHR.L	-0.742706	-0.118398	1	8	sp|Q6KC79|NIPBL_HUMAN	STYX	CENTER	1	1	0.99	0.998	SGNSANHHADNPRHGSSEDYLHMVHRLSSDD GNSANHHADNPRHGSSEDYLHMVHRLSSDDG
sp|Q7Z3C6|ATG9A_HUMAN_755	R.APQSphosIPR.S	R.APQSphosIPR.S	-0.742706	-0.375556	1	3	sp|Q7Z3C6|ATG9A_HUMAN	STYX	CENTER	0.9833	0.9806	1	1	ESAPDEGGEGARAPQSIPRSASYPCAAPRPG
sp|Q86V48|LUZP1_HUMAN_1023	A.AWNHSASphosMEEEGEDCTLSVYR.Q	A.AWNHSASphosMEEEGEDCTLSVYR.Q	-0.742706	0.0613077	7	2	sp|Q86V48|LUZP1_HUMAN	STYX	CENTER	1	1	0.998	0.996	RVGDTITVAAWNHSASMEEEGEDCTLSVYRQ
sp|Q86X29|LSR_HUMAN_435 436_C	R.AMSEV(TS)phosLHEDDWR.S	R.AMSEV(TS)phosLHEDDWR.S	-0.742706	0.124873	7	5	sp|Q86X29|LSR_HUMAN	STYX	CENTER	1	1	1	1	PGPPSGRVERAMSEVTSLHEDDWRSRPSRGP GPPSGRVERAMSEVTSLHEDDWRSRPSRGPA
sp|Q86Y46|K2C73_HUMAN_145	K.FASphosFIDK.V	K.FASphosFIDKVR.F	-0.742706	-0.421625	9	6	sp|Q86Y46|K2C73_HUMAN	STYX	CENTER	0.9956	0.9962	1	1	AQEREQIKVLNNKFASFIDKVRFLEQQNQVL
sp|Q86YV5|PRAG1_HUMAN_889	K.GSphosGHWLPAAGLAGNR.G	K.GSphosGHWLPAAGLAGNR.G	-0.742706	-0.111075	1	4	sp|Q86YV5|PRAG1_HUMAN	STYX	CENTER	0.9999	1	1	1	PVFSSSDPLEKAFKGSGHWLPAAGLAGNRGG
sp|Q8N6H7|ARFG2_HUMAN_432	K.AISphosSDMFFGR.E	K.AISphosSDMFFGR.E	-0.742706	0.0870708	5	5	sp|Q8N6H7|ARFG2_HUMAN	STYX	CENTER	0.9998	0.9998	0.983	0.983	ESSEARQKFAGAKAISSDMFFGREVDAEYEA
sp|Q8NC51|PAIRB_HUMAN_202 203_C	R.(SS)phosFSHYSGLK.H	R.(SS)phosFSHYSGLK.H	-0.742706	-0.624584	25	16	sp|Q8NC51|PAIRB_HUMAN	STYX	CENTER	0.9999	1	0.998	0.998	SRGKREFDRHSGSDRSSFSHYSGLKHEDKRG RGKREFDRHSGSDRSSFSHYSGLKHEDKRGG
sp|Q8NFC6|BD1L1_HUMAN_2954	K.RSphosLTVSDDAESSEPER.K	R.SphosLTVSDDAESSEPER.K	-0.742706	0.58882	3	7	sp|Q8NFC6|BD1L1_HUMAN	STYX	CENTER	0.9999	1	0.983	0.995	KIVTSVRRRGRKPKRSLTVSDDAESSEPERK
sp|Q8TAQ2|SMRC2_HUMAN_548	K.TphosPQQTSASQQMLNFPDKGK.E	K.TphosPQQTSASQQMLNFPDK.G	-0.742706	0.143082	1	4	sp|Q8TAQ2|SMRC2_HUMAN	STYX	CENTER	1	1	0.642	0.985	VLADTPSGLVPLQPKTPQQTSASQQMLNFPD
sp|Q8WVM7|STAG1_HUMAN_756	K.ITDGSphosPSKEDLLVLR.K	K.ITDGSphosPSKEDLLVLR.K	-0.742706	-0.133195	5	5	sp|Q8WVM7|STAG1_HUMAN	STYX	CENTER	0.9999	1	0.991	0.996	SHYSILWQLVKITDGSPSKEDLLVLRKTVKS
sp|Q96BR9|ZBT8A_HUMAN_161	R.SSFYSGGWQEGSSSphosPR.S	R.SSFYSGGWQEGSSSphosPR.S	-0.742706	0.368833	1	2	sp|Q96BR9|ZBT8A_HUMAN	STYX	CENTER	0.9994	1	0.944	0.96	ERSSFYSGGWQEGSSSPRSHLSPEQGTGIIS
sp|Q96CB8|INT12_HUMAN_378	R.SVSphosCDNVSK.V	R.SVSphosCDNVSK.V	-0.742706	0.197629	5	9	sp|Q96CB8|INT12_HUMAN	STYX	CENTER	0.9985	0.9999	0.995	0.995	PPPLTLGKTGLSRSVSCDNVSKVGLPSPSSL
sp|Q9BTV6|DPH7_HUMAN_371	K.GASphosELPTPCHECR.E	K.GASphosELPTPCHECR.E	-0.742706	0.28926	3	1	sp|Q9BTV6|DPH7_HUMAN	STYX	CENTER	0.9803	0.971	0.982	0.987	FPSNLGTKTADLKGASELPTPCHECREDNDG
sp|Q9BXS5|AP1M1_HUMAN_223	K.VLFDNTphosGR.G	K.VLFDNTphosGR.G	-0.742706	-0.193949	3	8	sp|Q9BXS5|AP1M1_HUMAN	STYX	CENTER	0.9993	1	1	1	PELRLGLNDKVLFDNTGRGKSKSVELEDVKF
sp|Q9H0D6|XRN2_HUMAN_487	N.TSFTSDGSPSphosPLGGIKR.K	N.TSFTSDGSPSphosPLGGIKR.K	-0.742706	0.0677772	8	14	sp|Q9H0D6|XRN2_HUMAN	STYX	CENTER	0.9994	1	0.997	0.996	PSISPNTSFTSDGSPSPLGGIKRKAEDSDSE
sp|Q9H165|BC11A_HUMAN_625	K.LLLGSphosPSSLSPFSK.R	K.LLLGSphosPSSLSPFSK.R	-0.742706	0.0350762	2	1	sp|Q9H165|BC11A_HUMAN	STYX	CENTER	0.9998	0.9996	0.995	0.994	GESASGGLSKKLLLGSPSSLSPFSKRIKLEK
sp|Q9NS69|TOM22_HUMAN_15	A.AAGAGEPQSphosPDELLPK.G	A.AAGAGEPQSphosPDELLPK.G	-0.742706	-0.249315	20	4	sp|Q9NS69|TOM22_HUMAN	STYX	CENTER	1	0.9862	1	1	_MAAAVAAAGAGEPQSPDELLPKGDAEKPEE
sp|Q9P266|JCAD_HUMAN_1319	R.LGHSLSphosVSK.D	R.LGHSLSphosVSKDSISR.E	-0.742706	-0.0188626	1	1	sp|Q9P266|JCAD_HUMAN	STYX	CENTER	0.9588	0.9998	0.889	0.985	SPGSGDRAQRLGHSLSVSKDSISREEKEHPA
sp|Q9UP95|S12A4_HUMAN_926	R.TphosLMMEQR.S	R.TphosLMMEQR.S	-0.742706	-0.0748967	5	5	sp|Q9UP95|S12A4_HUMAN	STYX	CENTER	0.9962	0.9999	1	1	VEMHNSDISAYTYERTLMMEQRSQMLRQMRL
tr|H0Y9Y3|H0Y9Y3_HUMAN_985	R.SLSphosLPGR.S	R.SLSphosLPGR.S	-0.742706	0.149535	3	1	tr|H0Y9Y3|H0Y9Y3_HUMAN	STYX	CENTER	0.9783	0.9884	0.996	0.993	NVQASSVYSESGRSLSLPGRSVPPPISTSPW
sp|Q09666|AHNK_HUMAN_5745 5746_C	K.(SS)phosKASLGSLEGEAEAEASSPK.G	K.(SS)phosKASLGSLEGEAEAEASSPK.G	-0.741634	0.221088	2	1	sp|Q09666|AHNK_HUMAN	STYX	CENTER	0.9402	0.925	1	1.002	GSPEASISGSKGDLKSSKASLGSLEGEAEAE SPEASISGSKGDLKSSKASLGSLEGEAEAEA
sp|Q92794|KAT6A_HUMAN_1089	R.RLSphosSQDVLR.C	R.RLSphosSQDVLR.C	-0.740457	0.0952718	2	2	sp|Q92794|KAT6A_HUMAN	STYX	CENTER	0.9984	0.9997	0.962	0.938	EDENELFPREYFRRLSSQDVLRCQSSSKRKS
sp|Q9H9A7|RMI1_HUMAN_292	R.QSSFEPEFVISphosPR.P	R.QSSFEPEFVISphosPRPK.E	-0.739922	0.624444	8	14	sp|Q9H9A7|RMI1_HUMAN	STYX	CENTER	1	1	0.998	0.999	TIPTRQSSFEPEFVISPRPKEEPSNLSIHVM
sp|O75113|N4BP1_HUMAN_288	R.RFSphosDSEER.H	R.RFSphosDSEER.H	-0.738641	0.221088	2	10	sp|O75113|N4BP1_HUMAN	STYX	CENTER	0.9985	0.9999	0.981	0.982	EEALSNERICQKRRFSDSEERHTKKQFSLEN
sp|Q14789|GOGB1_HUMAN_537 538 539_C	R.(SSS)phosAEESGQDVLENTFSQK.H	R.(SSS)phosAEESGQDVLENTFSQK.H	-0.738428	0.124873	2	9	sp|Q14789|GOGB1_HUMAN	STYX	CENTER	0.9997	1	0.984	1	REVSEISIVDIANKRSSSAEESGQDVLENTF EVSEISIVDIANKRSSSAEESGQDVLENTFS VSEISIVDIANKRSSSAEESGQDVLENTFSQ
sp|O75691|UTP20_HUMAN_2064	R.LPPQSCLLLPPTphosPVR.G	R.LPPQSCLLLPPTphosPVR.G	-0.736404	-3.92575	2	3	sp|O75691|UTP20_HUMAN	STYX	NR	0.9974	1	0.989	0.998	PDPRLPPQSCLLLPPTPVRGGQKAVVSRKTN
sp|O15297|PPM1D_HUMAN_432	R.VNSphosKDHIPALVR.S	R.VNSphosKDHIPALVR.S	-0.736192	0.0805448	4	4	sp|O15297|PPM1D_HUMAN	STYX	CENTER	0.9998	0.9999	1	1	PPVKSLEEDPWPRVNSKDHIPALVRSNAFSE
sp|Q6PJF5|RHDF2_HUMAN_387 388 389_C	R.SI(SST)phosVQR.Q	R.SI(SST)phosVQR.Q	-0.73566	-0.273677	4	3	sp|Q6PJF5|RHDF2_HUMAN	STYX	CENTER	0.9982	0.9989	0.659	0.706	GVVGNWLNRSYRRSISSTVQRQLESFDSHRP VVGNWLNRSYRRSISSTVQRQLESFDSHRPY VGNWLNRSYRRSISSTVQRQLESFDSHRPYF
sp|Q68DK7|MSL1_HUMAN_205	K.SphosPLGGGGGSGASSQAACLK.Q	K.SphosPLGGGGGSGASSQAACLK.Q	-0.735236	-0.0326684	20	18	sp|Q68DK7|MSL1_HUMAN	STYX	CENTER	1	1	0.999	0.999	GTLAASEGRWKSMRKSPLGGGGGSGASSQAA
sp|Q7Z2K8|GRIN1_HUMAN_877	R.SVATGPMTphosPQAAAPPAFPEVR.V	R.SVATGPMTphosPQAAAPPAFPEVR.V	-0.735129	0.131065	4	14	sp|Q7Z2K8|GRIN1_HUMAN	STYX	CENTER	1	1	0.997	0.998	SLGAAETRSVATGPMTPQAAAPPAFPEVRVR
sp|Q6WCQ1|MPRIP_HUMAN_269	R.VESGYFSphosLEK.T	R.VESGYFSphosLEK.T	-0.734599	-0.0749674	2	2	sp|Q6WCQ1|MPRIP_HUMAN	STYX	CENTER	0.9986	0.9998	0.975	0.972	RMDCGRKVRVESGYFSLEKTKQDLKAEEQQL
sp|O75486|SUPT3_HUMAN_301	R.IGPLSphosPFTNAYR.R	R.IGPLSphosPFTNAYR.R	-0.734175	-1.41118	2	1	sp|O75486|SUPT3_HUMAN	STYX	Q4	0.9995	0.9987	0.997	0.996	IREAIRRYSHRIGPLSPFTNAYRRNGMAFLA
sp|P05787|K2C8_HUMAN_477 478_C	K.LVSE(SS)phosDVLPK.-	K.LVSE(SS)phosDVLPK.-	-0.734175	-0.700064	8	4	sp|P05787|K2C8_HUMAN	STYX	Q4	0.9997	0.9998	0.996	0.996	VVKKIETRDGKLVSESSDVLPK_________ VKKIETRDGKLVSESSDVLPK__________
sp|P16402|H13_HUMAN_103	K.GTGASphosGSFK.L	K.GTGASphosGSFK.L	-0.734175	0.332981	2	1	sp|P16402|H13_HUMAN	STYX	CENTER	0.9935	0.9966	0.977	0.946	LVSKGTLVQTKGTGASGSFKLNKKAASGEGK
sp|Q4G0F5|VP26B_HUMAN_317 318 319_C	R.FEG(TTS)phosLGEVR.T	R.FEG(TTS)phosLGEVR.T	-0.734175	-0.00518771	2	1	sp|Q4G0F5|VP26B_HUMAN	STYX	CENTER	0.9997	0.9995	1	1.001	SMSHQAAIASQRFEGTTSLGEVRTPSQLSDN MSHQAAIASQRFEGTTSLGEVRTPSQLSDNN SHQAAIASQRFEGTTSLGEVRTPSQLSDNNC
sp|Q8N3X1|FNBP4_HUMAN_517	K.VQTTphosPKVEEEQDLK.F	K.VQTTphosPKVEEEQDLK.F	-0.734175	0.238332	8	4	sp|Q8N3X1|FNBP4_HUMAN	STYX	CENTER	1	1	0.983	0.943	EMEVEESPEKIKVQTTPKVEEEQDLKFQIGE
sp|Q9H8M2|BRD9_HUMAN_566	R.DQHHLGSphosPSR.L	R.DQHHLGSphosPSR.L	-0.734175	-0.00518771	6	16	sp|Q9H8M2|BRD9_HUMAN	STYX	CENTER	0.9998	1	0.993	0.992	SSLSNASERDQHHLGSPSRLSVGEQPDVTHD
sp|P02545|LMNA_HUMAN_636	R.SVGGSGGGSphosFGDNLVTR.S	R.SVGGSGGGSphosFGDNLVTR.S	-0.733963	0.137204	8	10	sp|P02545|LMNA_HUMAN	STYX	CENTER	1	1	0.996	0.995	TVTRSYRSVGGSGGGSFGDNLVTRSYLLGNS
sp|P30989|NTR1_HUMAN_401	R.KADSphosVSSNHTLSSNATR.E	K.ADSphosVSSNHTLSSNATR.E	-0.733963	-0.358069	2	1	sp|P30989|NTR1_HUMAN	STYX	CENTER	1	0.9997	0.989	0.54	WRRRRKRPAFSRKADSVSSNHTLSSNATRET
sp|P42167|LAP2B_HUMAN_183 184_C	N.DSDR(YS)phosDNEEDSKIELK.L	R.QNGSNDSDR(YS)phosDNEEDSKIELK.L	-0.733963	-0.0677898	48	6	sp|P42167|LAP2B_HUMAN	STYX	CENTER	1	0.9998	0.998	0.932	SAENTRQNGSNDSDRYSDNEEDSKIELKLEK AENTRQNGSNDSDRYSDNEEDSKIELKLEKR
sp|Q5THJ4|VP13D_HUMAN_2091 2092 2093 2094_C	R.K(TTST)phosEEPR.G	K.(TTST)phosEEPR.G	-0.733963	-0.0326684	4	5	sp|Q5THJ4|VP13D_HUMAN	STYX	CENTER	0.999	0.999	1	1	PSASPTGIPKHSLRKTTSTEEPRGTHSQGQF SASPTGIPKHSLRKTTSTEEPRGTHSQGQFT ASPTGIPKHSLRKTTSTEEPRGTHSQGQFTM SPTGIPKHSLRKTTSTEEPRGTHSQGQFTMP
sp|Q6ZU35|CRAD_HUMAN_1201 1202_C	K.RF(ST)phosPDAAPVSTEPAWLALAK.R	K.RF(ST)phosPDAAPVSTEPAWLALAK.R	-0.733963	0.185755	2	7	sp|Q6ZU35|CRAD_HUMAN	STYX	CENTER	1	1	0.984	0.999	SAPPAPLVKEVTKRFSTPDAAPVSTEPAWLA APPAPLVKEVTKRFSTPDAAPVSTEPAWLAL
sp|Q96JM3|CHAP1_HUMAN_445	P.SGSphosPDLWK.L	R.KPSGSphosPDLW.K	-0.733963	-0.0606828	12	9	sp|Q96JM3|CHAP1_HUMAN	STYX	CENTER	1	1	0.99	0.988	IRSPAGSPELRKPSGSPDLWKLSPDQRKTSP
sp|Q96RK0|CIC_HUMAN_496	K.VFSphosPVIR.S	R.KVFSphosPVIR.S	-0.733963	0.255577	12	15	sp|Q96RK0|CIC_HUMAN	STYX	CENTER	0.9993	0.9998	1	1	GEDPEGNKGFGRKVFSPVIRSSFTHCRPPLD
sp|Q9BW61|DDA1_HUMAN_33	R.RPSphosVYLPTR.E	R.RPSphosVYLPTR.E	-0.733963	0.37017	26	28	sp|Q9BW61|DDA1_HUMAN	STYX	CENTER	1	1	0.995	0.994	RFHADSVCKASNRRPSVYLPTREYPSEQIIV
sp|Q9ULU4|PKCB1_HUMAN_514	K.TDKTSTTGSphosILNLNLDR.S	K.TDKTSTTGSphosILNLNLDR.S	-0.728998	-0.603825	2	1	sp|Q9ULU4|PKCB1_HUMAN	STYX	CENTER	0.9657	0.9012	0.986	0.913	SAPITTKTDKTSTTGSILNLNLDRSKAEMDL
sp|Q96T37|RBM15_HUMAN_935	K.DKENTGVLHAFPPCEFSQQFLDSphosPAK.A	K.DKENTGVLHAFPPCEFSQQFLDSphosPAK.A	-0.728052	-0.4335	8	8	sp|Q96T37|RBM15_HUMAN	STYX	CENTER	1	1	0.998	0.998	LHAFPPCEFSQQFLDSPAKALAKSEEDYLVM
sp|Q6NZY4|ZCHC8_HUMAN_556 557_C	N.SVA(SS)phosPCPNELDLPVPEGK.T	N.SVA(SS)phosPCPNELDLPVPEGK.T	-0.727841	0.190323	2	2	sp|Q6NZY4|ZCHC8_HUMAN	STYX	CENTER	0.9859	1	0.998	0.998	SDVPVDTPLTGNSVASSPCPNELDLPVPEGK DVPVDTPLTGNSVASSPCPNELDLPVPEGKT
sp|O95239|KIF4A_HUMAN_799	R.TphosFSLTEVR.G	R.RRTphosFSLTEVR.G	-0.726896	-1.00519	2	1	sp|O95239|KIF4A_HUMAN	STYX	Q4	0.9989	1	0.798	0.901	KKESGENPPPKLRRRTFSLTEVRGQVSESED
sp|P02545|LMNA_HUMAN_303	R.IRIDSLSphosAQLSQLQK.Q	R.IRIDSLSphosAQLSQLQK.Q	-0.726162	-0.0965018	2	2	sp|P02545|LMNA_HUMAN	STYX	CENTER	1	1	0.877	0.895	AHEELQQSRIRIDSLSAQLSQLQKQLAAKEA
sp|Q13610|PWP1_HUMAN_485	R.NSSphosISGPFGSR.S	R.NSSphosISGPFGSR.S	-0.726162	0.514819	2	4	sp|Q13610|PWP1_HUMAN	STYX	CENTER	0.9981	0.9998	0.992	0.995	FGRRERLVLGSARNSSISGPFGSRSSDTPME
sp|Q9H2Y7|ZN106_HUMAN_1279	R.ENSphosPSSQSAGLSSINK.E	R.ENSphosPSSQSAGLSSINK.E	-0.726162	0.0997818	4	5	sp|Q9H2Y7|ZN106_HUMAN	STYX	CENTER	1	1	0.906	0.982	LKFSVEQRNTRNRENSPSSQSAGLSSINKEG
sp|Q9ULL5|PRR12_HUMAN_1135	R.SRPALSphosPLGDIDFCPPNPGPDGPR.R	R.SRPALSphosPLGDIDFCPPNPGPDGPR.R	-0.725638	-0.089252	4	3	sp|Q9ULL5|PRR12_HUMAN	STYX	CENTER	1	1	0.996	0.996	RLPDLVSSCRSRPALSPLGDIDFCPPNPGPD
sp|Q9Y485|DMXL1_HUMAN_1896	R.ASSphosFLDTSK.D	R.ASSphosFLDTSK.D	-0.725638	0.3058	4	6	sp|Q9Y485|DMXL1_HUMAN	STYX	CENTER	0.9995	0.9999	0.997	0.996	MPKVIKKTRPFYRASSFLDTSKDCSPSSPLK
sp|P15311|EZRI_HUMAN_535 536_C	R.QLLTL(SS)phosELSQAR.D	R.QLLTL(SS)phosELSQAR.D	-0.725324	-0.0606828	14	19	sp|P15311|EZRI_HUMAN	STYX	CENTER	1	1	0.962	0.996	EAEKNERVQRQLLTLSSELSQARDENKRTHN AEKNERVQRQLLTLSSELSQARDENKRTHND
sp|P49792|RBP2_HUMAN_1509	R.KQSphosLPATSIPTPASFK.F	R.KQSphosLPATSIPTPASFK.F	-0.725324	0.185755	8	26	sp|P49792|RBP2_HUMAN	STYX	CENTER	1	1	0.998	0.998	GSSTKCAACQNPRKQSLPATSIPTPASFKFG
sp|Q7Z6E9|RBBP6_HUMAN_1381	K.DVSphosHEIIQHEVK.S	K.DVSphosHEIIQHEVK.S	-0.725324	0.232676	2	3	sp|Q7Z6E9|RBBP6_HUMAN	STYX	CENTER	0.9999	1	1	1	ESEPSEKIQKFTKDVSHEIIQHEVKSSKNSA
sp|Q96N06|SPT33_HUMAN_35	K.LMEKHSphosQEAR.Q	K.LMEKHSphosQEAR.Q	-0.725324	-0.119075	4	8	sp|Q96N06|SPT33_HUMAN	STYQ	CENTER	0.999	0.9996	1	1	TYSVPKSKEKLMEKHSQEARQADRESEKPVD
sp|P38398|BRCA1_HUMAN_1009	K.NLLEENFEEHSMSphosPEREMGNENIPSTVSTISR.N	K.NLLEENFEEHSMSphosPER.E	-0.725219	0.794575	5	4	sp|P38398|BRCA1_HUMAN	STYX	Q1	0.9999	1	0.995	0.991	CKKNLLEENFEEHSMSPEREMGNENIPSTVS
sp|Q9BX63|FANCJ_HUMAN_930	A.SHLSphosPENFVEDEAK.L	A.SHLSphosPENFVEDEAK.L	-0.725219	2.2967	8	4	sp|Q9BX63|FANCJ_HUMAN	STYX	Q1	1	1	0.995	0.997	KYSTSPYLLEAASHLSPENFVEDEAKICVQE
sp|Q9H1K0|RBNS5_HUMAN_548	R.TRSphosLDFR.E	R.TRSphosLDFR.E	-0.725219	2.24954	3	2	sp|Q9H1K0|RBNS5_HUMAN	STYX	Q1	0.988	0.9897	0.976	0.922	EREQFRVASLHTRTRSLDFREIGPFQLEPSR
sp|Q9Y297|FBW1A_HUMAN_127	R.KLSphosASYEKEK.E	R.KLSphosASYEK.E	-0.725219	1.70984	3	11	sp|Q9Y297|FBW1A_HUMAN	STYX	Q1	0.9981	0.9994	0.986	0.983	ANGTSSMIVPKQRKLSASYEKEKELCVKYFE
sp|P35580|MYH10_HUMAN_1956	R.QLHLEGASLELSphosDDDTESK.T	R.QLHLEGASLELSphosDDDTESK.T	-0.725219	-1.05571	7	2	sp|P35580|MYH10_HUMAN	STYX	Q4	1	1	0.998	0.995	SGRRQLHLEGASLELSDDDTESKTSDVNETQ
sp|P48552|NRIP1_HUMAN_564	K.AGSphosPINLSQHSLVIK.W	K.AGSphosPINLSQHSLVIK.W	-0.725219	-0.937113	5	6	sp|P48552|NRIP1_HUMAN	STYX	Q4	1	1	0.999	0.998	TPVSTPPLLTSSKAGSPINLSQHSLVIKWNS
sp|Q9P2E9|RRBP1_HUMAN_959	R.IRSphosIEALLEAGQAR.D	R.IRSphosIEALLEAGQAR.D	-0.725219	-0.989691	5	2	sp|Q9P2E9|RRBP1_HUMAN	STYX	Q4	0.9999	0.9999	1	1	QEARAENSQLTERIRSIEALLEAGQARDAQD
sp|A6H8Y1|BDP1_HUMAN_99 100 101 102 103_C	R.I(SSTSS)phosLVK.S	R.I(SSTSS)phosLVK.S	-0.725219	0.0350762	1	3	sp|A6H8Y1|BDP1_HUMAN	STYX	CENTER	0.9952	0.9996	0.999	1.001	SSRSSSTVSQRRKRISSTSSLVKSSVSVPSE SRSSSTVSQRRKRISSTSSLVKSSVSVPSES RSSSTVSQRRKRISSTSSLVKSSVSVPSESH SSSTVSQRRKRISSTSSLVKSSVSVPSESHP SSTVSQRRKRISSTSSLVKSSVSVPSESHPL
sp|A6QL63|BTBDB_HUMAN_65	R.HNSphosFDTVNTALVEDSEGLDCAGQHCSR.L	R.HNSphosFDTVNTALVEDSEGLDCAGQHCSR.L	-0.725219	-0.375556	3	5	sp|A6QL63|BTBDB_HUMAN	STYX	CENTER	1	1	0.997	0.995	SCWPPLADSMHSRHNSFDTVNTALVEDSEGL
sp|A8MVW0|F1712_HUMAN_789	R.RDSphosLTSPEDELGAEVGDEAGDKK.S	R.RDSphosLTSPEDELGAEVGDEAGDKK.S	-0.725219	0.166229	3	4	sp|A8MVW0|F1712_HUMAN	STYX	CENTER	1	1	0.987	0.995	RGDSSRSSASELRRDSLTSPEDELGAEVGDE
sp|O43242|PSMD3_HUMAN_47	K.EEAATGGGSphosTGEADGK.T	K.EEAATGGGSphosTGEADGK.T	-0.725219	0.137257	1	2	sp|O43242|PSMD3_HUMAN	STYX	CENTER	1	1	0.978	0.943	PQDVEMKEEAATGGGSTGEADGKTAAAAAEH
sp|O60563|CCNT1_HUMAN_495	K.VHAAADKHNSphosVEDSVTK.S	K.HNSphosVEDSVTK.S	-0.725219	0.478351	1	2	sp|O60563|CCNT1_HUMAN	STYX	CENTER	1	1	0.989	0.998	IKMRIKVHAAADKHNSVEDSVTKSREHKEKH
sp|O76024|WFS1_HUMAN_32	R.LNATASphosLEQER.S	R.LNATASphosLEQER.S	-0.725219	-0.380832	6	2	sp|O76024|WFS1_HUMAN	STYX	CENTER	0.9998	0.9999	0.99	0.936	PAPQPQARSRLNATASLEQERSERPRAPGPQ
sp|O94916|NFAT5_HUMAN_145	R.HTVLYISphosPPPEDLLDNSR.M	R.HTVLYISphosPPPEDLLDNSR.M	-0.725219	0.39093	1	2	sp|O94916|NFAT5_HUMAN	STYX	CENTER	0.9996	1	0.995	0.997	QQHPSTPKRHTVLYISPPPEDLLDNSRMSCQ
sp|O95471|CLD7_HUMAN_206	K.SNSphosSKEYV.-	K.SNSphosSKEYV.-	-0.725219	-0.0326684	1	1	sp|O95471|CLD7_HUMAN	STYX	CENTER	0.9948	0.999	0.926	0.977	SKAGYRVPRSYPKSNSSKEYV__________
sp|P02545|LMNA_HUMAN_428 429_C	R.(SS)phosFSQHAR.T	R.(SS)phosFSQHAR.T	-0.725219	0.00835882	9	13	sp|P02545|LMNA_HUMAN	STYX	CENTER	0.9989	0.9998	1	1	GSVTKKRKLESTESRSSFSQHARTSGRVAVE SVTKKRKLESTESRSSFSQHARTSGRVAVEE
sp|P07948|LYN_HUMAN_13	K.DSLSphosDDGVDLK.T	K.GKDSLSphosDDGVDLK.T	-0.725219	0.0870708	21	19	sp|P07948|LYN_HUMAN	STYX	CENTER	1	1	0.996	0.995	___MGCIKSKGKDSLSDDGVDLKTQPVRNTE
sp|P48634|PRC2A_HUMAN_456	R.KQSphosSSEISLAVER.A	R.KQSphosSSEISLAVER.A	-0.725219	0.209406	4	11	sp|P48634|PRC2A_HUMAN	STYX	CENTER	1	1	0.993	0.992	APEDEDEAWRQRRKQSSSEISLAVERARRRR
sp|P55854|SUMO3_HUMAN_27	K.VAGQDGSphosVVQFK.L	K.VAGQDGSphosVVQFK.L	-0.725219	-0.118398	4	1	sp|P55854|SUMO3_HUMAN	STYX	CENTER	0.9998	0.9925	1	1	TENDHINLKVAGQDGSVVQFKIKRHTPLSKL
sp|P82909|RT36_HUMAN_61	K.GSKSphosPDLLMYQGPPDTAEIIK.T	K.GSKSphosPDLLMYQGPPDTAEIIK.T	-0.725219	-0.026162	3	6	sp|P82909|RT36_HUMAN	STYX	CENTER	1	1	0.943	0.978	PSHSSVISQHSKGSKSPDLLMYQGPPDTAEI
sp|Q07157|ZO1_HUMAN_297	R.DDISEIQSLASphosDHSGR.S	R.DDISEIQSLASphosDHSGR.S	-0.725219	0.322174	3	5	sp|Q07157|ZO1_HUMAN	STYX	CENTER	0.9979	1	0.994	0.992	NASERDDISEIQSLASDHSGRSHDRPPRRSR
sp|Q12959|DLG1_HUMAN_571	R.EQMMNSSISSphosGSGSLR.T	R.EQMMNSSISSphosGSGSLR.T	-0.725219	-0.429327	1	3	sp|Q12959|DLG1_HUMAN	STYX	CENTER	0.9959	0.9971	0.961	0.963	KIHDLREQMMNSSISSGSGSLRTSQKRSLYV
sp|Q13433|S39A6_HUMAN_478	K.YESQLSphosTNEEKVDTDDRTEGYLR.A	K.YESQLSphosTNEEK.V	-0.725219	0.375416	3	8	sp|Q13433|S39A6_HUMAN	STYX	CENTER	0.9807	0.9999	0.995	0.987	DVEIKKQLSKYESQLSTNEEKVDTDDRTEGY
sp|Q13523|PRP4B_HUMAN_431	R.SKDASphosPINR.W	R.SKDASphosPINR.W	-0.725219	0.197629	2	3	sp|Q13523|PRP4B_HUMAN	STYX	CENTER	0.9886	0.9975	0.963	0.961	PRDDILSRRERSKDASPINRWSPTRRRSRSP
sp|Q13813|SPTN1_HUMAN_1217	R.SphosLQQLAEER.S	R.WRSphosLQQLAEER.S	-0.725219	-0.0536452	21	16	sp|Q13813|SPTN1_HUMAN	STYX	CENTER	1	1	1	1	VATFNSIKELNERWRSLQQLAEERSQLLGSA
sp|Q14694|UBP10_HUMAN_549	K.LLSPSphosNEK.L	K.LLSPSphosNEK.L	-0.725219	-0.358173	1	2	sp|Q14694|UBP10_HUMAN	STYX	CENTER	0.9921	0.9944	0.966	0.973	GLHEEMLNLKKLLSPSNEKLTISNGPKNHSV
sp|Q15696|U2AFM_HUMAN_349	R.DIYLSphosPDRTGSSF.G	R.DIYLSphosPDRTGSSFGK.N	-0.725219	-0.0748967	15	12	sp|Q15696|U2AFM_HUMAN	STYX	CENTER	0.9998	0.9998	0.997	0.993	NPNNEFWEANRDIYLSPDRTGSSFGKNSERR
sp|Q2TAL8|QRIC1_HUMAN_303	Y.SATGTITSphosPTGETWTIPVYSAQPR.G	Y.SATGTITSphosPTGETWTIPVYSAQPR.G	-0.725219	0.552294	3	1	sp|Q2TAL8|QRIC1_HUMAN	STYX	CENTER	0.9464	0.9055	0.994	0.958	TVDSAHLYSATGTITSPTGETWTIPVYSAQP
sp|Q5HYK7|SH319_HUMAN_369	R.SSSphosDMDLQKK.Q	R.SSSphosDMDLQKK.Q	-0.725219	0.173782	1	2	sp|Q5HYK7|SH319_HUMAN	STYX	CENTER	0.9984	0.9999	0.993	0.984	ATRRSNKKLPFNRSSSDMDLQKKQSNLATGL
sp|Q5TKA1|LIN9_HUMAN_65	R.LFSphosDEDDR.Q	R.SRLFSphosDEDDR.Q	-0.725219	0.232676	11	3	sp|Q5TKA1|LIN9_HUMAN	STYX	CENTER	0.9996	0.9991	1	0.997	AVEMPFRNSKRSRLFSDEDDRQINTRSPKRN
sp|Q5VZ89|DEN4C_HUMAN_1046	R.SCSphosFSSESR.A	R.SCSphosFSSESR.A	-0.725219	0.173782	3	7	sp|Q5VZ89|DEN4C_HUMAN	STYX	CENTER	0.9984	0.9997	0.993	0.993	DRGEKRQKHFPERSCSFSSESRAGMLLKKSS
sp|Q69YQ0|CYTSA_HUMAN_54	K.TKSphosSDDLLAGMA.G	K.TKSphosSDDLLAGMAGGVTVTNGVK.G	-0.725219	-0.41118	1	1	sp|Q69YQ0|CYTSA_HUMAN	STYX	CENTER	0.9411	0.9998	0.914	0.941	KLVKPGTAASLSKTKSSDDLLAGMAGGVTVT
sp|Q76FK4|NOL8_HUMAN_378	R.NDREYDSphosGDTDEIIAMK.K	R.NDREYDSphosGDTDEIIAMK.K	-0.725219	-0.340791	1	2	sp|Q76FK4|NOL8_HUMAN	STYX	CENTER	0.9989	1	0.828	0.956	HDSDDDIMRNDREYDSGDTDEIIAMKKNVAK
sp|Q7Z333|SETX_HUMAN_1366	R.RLSphosDCESTDVK.R	R.RLSphosDCESTDVKR.A	-0.725219	0.155622	29	30	sp|Q7Z333|SETX_HUMAN	STYX	CENTER	1	1	0.998	0.998	QRQIRPKSQKNRRRLSDCESTDVKRAGSHTA
sp|Q8N302|AGGF1_HUMAN_337 338_C	K.VTVP(TS)phosGNTIESPLHENISNSTSFKDEK.L	K.VTVP(TS)phosGNTIESPLHENISNSTSFK.D	-0.725219	0.470127	1	4	sp|Q8N302|AGGF1_HUMAN	STYX	CENTER	0.9685	0.986	0.519	0.886	IGIHHKNSPPKVTVPTSGNTIESPLHENISN GIHHKNSPPKVTVPTSGNTIESPLHENISNS
sp|Q8N3X1|FNBP4_HUMAN_499 508	K.IDENSphosDKEMEVEESphosPEKIK.V	K.IDENSphosDKEMEVEESphosPEKIK.V	-0.725219	-0.257739	1	4	sp|Q8N3X1|FNBP4_HUMAN	STYX	CENTER	0.9999	1	1	1	ETAIGAENSEKIDENSDKEMEVEESPEKIKV EKIDENSDKEMEVEESPEKIKVQTTPKVEEE
sp|Q8N3X1|FNBP4_HUMAN_516 517_C	K.VQ(TT)phosPKVEEEQDLK.F	K.VQ(TT)phosPKVEEEQDLK.F	-0.725219	-0.039638	3	14	sp|Q8N3X1|FNBP4_HUMAN	STYX	CENTER	0.9998	1	1	1	KEMEVEESPEKIKVQTTPKVEEEQDLKFQIG EMEVEESPEKIKVQTTPKVEEEQDLKFQIGE
sp|Q8TF01|PNISR_HUMAN_290	R.SKFDSphosDEEEEDTENVEAA.S	R.SKFDSphosDEEEEDTENVEAASSGK.V	-0.725219	0.456683	17	12	sp|Q8TF01|PNISR_HUMAN	STYX	CENTER	1	1	0.996	0.998	EGGDGPRLPQRSKFDSDEEEEDTENVEAASS
sp|Q8TF01|PNISR_HUMAN_672	R.SRSphosIDKDR.K	R.SRSphosIDKDR.K	-0.725219	0.270055	5	4	sp|Q8TF01|PNISR_HUMAN	STYX	CENTER	0.9854	0.9772	0.946	0.948	KGEAKEQERKKERSRSIDKDRKKKDKERERE
sp|Q8WUA4|TF3C2_HUMAN_165	K.DLDRPESphosQSPK.R	K.DLDRPESphosQSPK.R	-0.725219	0.0482515	3	12	sp|Q8WUA4|TF3C2_HUMAN	STYQ	CENTER	0.9992	0.9999	0.73	0.747	ELLLLKLSKDLDRPESQSPKRPPEDFETPSG
sp|Q8WWL2|SPIR2_HUMAN_440	R.DRSphosFSEHDLAQLR.S	R.DRSphosFSEHDLAQLR.S	-0.725219	0.0997818	5	1	sp|Q8WWL2|SPIR2_HUMAN	STYX	CENTER	1	0.9996	0.989	0.5	EEESPCGEVTLKRDRSFSEHDLAQLRSEVAS
sp|Q8WX93|PALLD_HUMAN_728	R.SAPAMQSSGSphosFNYARPK.Q	R.SAPAMQSSGSphosFNYARPK.Q	-0.725219	-0.269404	3	2	sp|Q8WX93|PALLD_HUMAN	STYX	CENTER	1	1	0.977	0.618	SALASRSAPAMQSSGSFNYARPKQFIAAQNL
sp|Q8WXA9|SREK1_HUMAN_435	R.ERSphosTSMR.K	R.ERSphosTSMR.K	-0.725219	-0.0350734	1	4	sp|Q8WXA9|SREK1_HUMAN	STYX	CENTER	0.9296	0.9984	0.956	0.966	EKERDHISERRERERSTSMRKSSNDRDGKEK
sp|Q92545|TM131_HUMAN_1619 1620 1621 1622_C	R.G(SYSS)phosIVNSSSSSDPK.L	R.G(SYSS)phosIVNSSSSSDPK.L	-0.725219	0.666153	1	8	sp|Q92545|TM131_HUMAN	STYX	CENTER	1	1	0.998	1	SPSPPAAPCPFVARGSYSSIVNSSSSSDPKI PSPPAAPCPFVARGSYSSIVNSSSSSDPKIK SPPAAPCPFVARGSYSSIVNSSSSSDPKIKQ PPAAPCPFVARGSYSSIVNSSSSSDPKIKQP
sp|Q96PN7|TREF1_HUMAN_762	R.SNSIDGSphosNVTVTPGPGEQTVDVEPR.L	R.SNSIDGSphosNVTVTPGPGEQTVDVEPR.L	-0.725219	0.354355	1	1	sp|Q96PN7|TREF1_HUMAN	STYX	CENTER	0.9911	0.9952	0.328	0.798	PTPRVLLCRSNSIDGSNVTVTPGPGEQTVDV
sp|Q9BVQ7|SPA5L_HUMAN_609 610_C	R.GSK(SS)phosQQEFQEVFNR.S	R.GSK(SS)phosQQEFQEVFNR.S	-0.725219	0.209406	1	1	sp|Q9BVQ7|SPA5L_HUMAN	STYQ	CENTER	0.9722	0.9997	0.886	0.666	LDGVGLKTIERRGSKSSQQEFQEVFNRSVMI DGVGLKTIERRGSKSSQQEFQEVFNRSVMII
sp|Q9C0J8|WDR33_HUMAN_1219	R.SSSphosLQGMDMASLPPR.K	R.SSSphosLQGMDMASLPPR.K	-0.725219	0.481203	33	74	sp|Q9C0J8|WDR33_HUMAN	STYX	CENTER	1	1	0.99	0.989	PPHDGHSPASRERSSSLQGMDMASLPPRKRP
sp|Q9H4L5|OSBL3_HUMAN_765	K.WHESIYCGGGSSphosSACVWR.A	K.WHESIYCGGGSSphosSACVWR.A	-0.725219	-0.0607522	1	2	sp|Q9H4L5|OSBL3_HUMAN	STYX	CENTER	0.9981	0.9991	0.951	0.971	LFGKWHESIYCGGGSSSACVWRANPMPKGYE
sp|Q9UK61|TASOR_HUMAN_699	K.SVGGDSphosDTEDMR.S	K.SVGGDSphosDTEDMR.S	-0.725219	-0.163253	5	3	sp|Q9UK61|TASOR_HUMAN	STYX	CENTER	1	1	0.991	0.995	LINLIQCRKKSVGGDSDTEDMRSKTVLKRKL
sp|Q9UKV3|ACINU_HUMAN_478	Q.LVGGLSphosPLSSPSDTK.A	R.ELLVSQHTVQLVGGLSphosPLSSPSDTK.A	-0.725219	0.0870708	19	22	sp|Q9UKV3|ACINU_HUMAN	STYX	CENTER	0.9988	0.9998	0.998	0.998	ELLVSQHTVQLVGGLSPLSSPSDTKAESPAE
sp|Q9UPX8|SHAN2_HUMAN_538	R.VYphosGTIKPAFNQNSAAK.V	R.VYphosGTIKPAFNQNSAAK.V	-0.725219	0.398013	1	2	sp|Q9UPX8|SHAN2_HUMAN	STYX	CENTER	0.9999	1	0.994	0.998	SPTTYNCPKSPTPRVYGTIKPAFNQNSAAKV
sp|Q9UQ35|SRRM2_HUMAN_1318 1329	K.ELSphosNSPLRENSFGSphosPLEFR.N	K.ELSphosNSPLRENSFGSphosPLEFR.N	-0.725219	0.0870708	12	1	sp|Q9UQ35|SRRM2_HUMAN	STYX	CENTER	0.9931	0.9575	0.882	0.674	SSWGGPHFSPEHKELSNSPLRENSFGSPLEF HKELSNSPLRENSFGSPLEFRNSGPLGTEMN
sp|Q9UQ35|SRRM2_HUMAN_1453	R.DGSGTphosPSR.H	R.DGSGTphosPSR.H	-0.725219	-0.118398	1	4	sp|Q9UQ35|SRRM2_HUMAN	STYX	CENTER	0.9678	0.995	0.99	0.991	RSRSGSSPGLRDGSGTPSRHSLSGSSPGMKD
sp|Q9Y2I7|FYV1_HUMAN_475	K.DIKFDDSphosDTEQIAEEGDDNLANSASPSK.R	K.FDDSphosDTEQIAEEGDDNLANSASPSKR.T	-0.725219	-0.0188626	1	3	sp|Q9Y2I7|FYV1_HUMAN	STYX	CENTER	0.9999	1	0.5	0.906	GHSEPSWFKDIKFDDSDTEQIAEEGDDNLAN
sp|Q9Y4E1|WAC2C_HUMAN_912	K.DHSVNSphosFK.N	K.DHSVNSphosFK.N	-0.725219	-0.0326684	1	3	sp|Q9Y4E1|WAC2C_HUMAN	STYX	CENTER	0.9993	0.9997	0.988	0.993	VQEKKRVVKKDHSVNSFKNQKHPESIQGSKE
sp|Q9Y4K1|CRBG1_HUMAN_410	K.LLEKEDSphosEAADSK.S	K.LLEKEDSphosEAADSK.S	-0.725219	-0.0677898	7	10	sp|Q9Y4K1|CRBG1_HUMAN	STYX	CENTER	1	1	0.998	0.998	ALIPVKDHKLLEKEDSEAADSKSLVLENVTD
sp|Q9Y3Q8|T22D4_HUMAN_165	R.SphosFTGGLGQLVVPSK.A	R.SphosFTGGLGQLVVPSK.A	-0.724068	0.899773	2	2	sp|Q9Y3Q8|T22D4_HUMAN	STYX	Q1	1	1	0.979	0.982	SWLRPPPTSPGPQARSFTGGLGQLVVPSKAK
sp|P52272|HNRPM_HUMAN_468	R.MGPLGLDHMASSphosIER.M	R.MGPLGLDHMASSphosIER.M	-0.724068	-0.209546	2	1	sp|P52272|HNRPM_HUMAN	STYX	CENTER	1	1	0.97	0.905	GIERMGPLGLDHMASSIERMGQTMERIGSGV
sp|A1X283|SPD2B_HUMAN_491	K.DWKGSphosKDVLR.K	K.DWKGSphosKDVLR.K	-0.722397	-0.645645	2	3	sp|A1X283|SPD2B_HUMAN	STYX	CENTER	0.9987	0.9994	1	1	GVMDSGLPWSKDWKGSKDVLRKASSDMSASA
sp|Q2TAZ0|ATG2A_HUMAN_403	R.RLSphosAQAHPAGK.M	R.RLSphosAQAHPAGK.M	-0.720418	0.48606	2	7	sp|Q2TAZ0|ATG2A_HUMAN	STYX	CENTER	0.9998	0.9999	1	1	DLASSVRSDMASRRLSAQAHPAGKMAPNPLL
sp|Q9NYV4|CDK12_HUMAN_343	R.SLSphosRSPLPSR.K	R.SLSphosRSPLPSR.K	-0.718652	-0.209546	2	1	sp|Q9NYV4|CDK12_HUMAN	STYX	CENTER	0.9988	0.9933	0.965	0.498	GRRRSSSPFLSKRSLSRSPLPSRKSMKSRSR
sp|Q13627|DYR1A_HUMAN_758	R.QGADREESPMTGVCVQQSphosPVASS.-	R.QGADREESPMTGVCVQQSphosPVASS.-	-0.717822	-0.466322	4	7	sp|Q13627|DYR1A_HUMAN	STYX	CENTER	0.9997	0.9996	0.996	0.997	ADREESPMTGVCVQQSPVASS__________
tr|A0A3B3ISY4|A0A3B3ISY4_HUMAN_26	K.ASphosLSYEEGHPSHSETDLLQR.Q	K.ASphosLSYEEGHPSHSETDLLQR.Q	-0.717615	-0.0820743	2	18	tr|A0A3B3ISY4|A0A3B3ISY4_HUMAN	STYX	CENTER	0.9902	1	0.942	0.989	SSGSCSSGSSPSLKASLSYEEGHPSHSETDL
sp|Q9H2Y7|ZN106_HUMAN_1281 1282_C	R.NRENSP(SS)phosQSAGLSSINK.E	R.ENSP(SS)phosQSAGLSSINK.E	-0.717201	0.0870708	4	1	sp|Q9H2Y7|ZN106_HUMAN	STYQ	CENTER	0.9999	1	0.876	0.5	FSVEQRNTRNRENSPSSQSAGLSSINKEGEE SVEQRNTRNRENSPSSQSAGLSSINKEGEEP
sp|P29375|KDM5A_HUMAN_1329 1330 1331_C	R.VVSSV(SSS)phosPR.Q	R.VVSSV(SSS)phosPR.Q	-0.716787	0.226882	6	10	sp|P29375|KDM5A_HUMAN	STYX	CENTER	1	0.9999	1	0.999	PSFQQSAFNRVVSSVSSSPRQTMDYDDEETD SFQQSAFNRVVSSVSSSPRQTMDYDDEETDS FQQSAFNRVVSSVSSSPRQTMDYDDEETDSD
sp|Q6UXH1|CREL2_HUMAN_70	K.YESphosSEIR.L	K.YESphosSEIR.L	-0.716787	0.00608706	10	6	sp|Q6UXH1|CREL2_HUMAN	STYX	CENTER	0.9994	1	0.977	0.982	GGNTAWEEKTLSKYESSEIRLLEILEGLCES
sp|Q86V48|LUZP1_HUMAN_1042	R.QLHNSphosLDPSELPGK.Q	R.QLHNSphosLDPSELPGK.Q	-0.71658	0.343707	2	2	sp|Q86V48|LUZP1_HUMAN	STYX	CENTER	0.9964	0.9999	0.995	0.996	EGEDCTLSVYRQLHNSLDPSELPGKQGLPES
sp|Q9UQ35|SRRM2_HUMAN_1916	R.SRASphosPVSR.R	R.SRASphosPVSR.R	-0.71658	-0.103752	4	3	sp|Q9UQ35|SRRM2_HUMAN	STYX	CENTER	0.9695	0.978	0.978	0.932	RSRTSVTRRRSRSRASPVSRRRSRSRTPPVT
sp|P42684|ABL2_HUMAN_599	K.ENIEGAQDATphosENSASSLAPGFIR.G	K.ENIEGAQDATphosENSASSLAPGFIR.G	-0.714514	-0.323717	2	1	sp|P42684|ABL2_HUMAN	STYX	CENTER	0.9999	1	0.488	0.492	KQVENKENIEGAQDATENSASSLAPGFIRGA
sp|P33240|CSTF2_HUMAN_113	K.SLGTGAPVIESphosPYGETISPEDAPESISK.A	K.SLGTGAPVIESphosPYGETISPEDAPESISK.A	-0.708862	0.76665	4	8	sp|P33240|CSTF2_HUMAN	STYX	Q1	0.999	0.9991	0.997	0.996	KEELKSLGTGAPVIESPYGETISPEDAPESI
sp|P55265|DSRAD_HUMAN_629	K.LGNSphosCEFR.L	K.LGNSphosCEFR.L	-0.708862	0.0774599	4	2	sp|P55265|DSRAD_HUMAN	STYX	CENTER	0.9994	0.9999	1	1	SPVTTLLECMHKLGNSCEFRLLSKEGPAHEP
sp|O60716|CTND1_HUMAN_268	R.VGGSphosSVDLHR.F	R.VGGSphosSVDLHR.F	-0.708043	0.112382	6	1	sp|O60716|CTND1_HUMAN	STYX	CENTER	1	0.9998	0.985	0.982	RQDVYGPQPQVRVGGSSVDLHRFHPEPYGLE
sp|Q13535|ATR_HUMAN_435 436 437_C	R.RL(SSS)phosLNPSK.R	R.RL(SSS)phosLNPSK.R	-0.708043	0.149483	8	20	sp|Q13535|ATR_HUMAN	STYX	CENTER	0.9998	1	1	1.997	LSSNSDGISPKRRRLSSSLNPSKRAPKQTEE SSNSDGISPKRRRLSSSLNPSKRAPKQTEEI SNSDGISPKRRRLSSSLNPSKRAPKQTEEIK
sp|Q6NZI2|CAVN1_HUMAN_167	K.VMIYQDEVKLPAKLSphosISK.S	K.LPAKLSphosISK.S	-0.708043	0.0482515	12	22	sp|Q6NZI2|CAVN1_HUMAN	STYX	CENTER	1	1	0.991	0.989	KVMIYQDEVKLPAKLSISKSLKESEALPEKE
sp|Q7Z3E2|CC186_HUMAN_726	R.SSSphosSGSLNAR.S	R.SSSphosSGSLNAR.S	-0.708043	-0.118398	4	5	sp|Q7Z3E2|CC186_HUMAN	STYX	CENTER	0.9982	0.9999	0.992	0.992	GSYDKEVSSMGSRSSSSGSLNARSSAEDRSP
sp|O60716|CTND1_HUMAN_228	R.HYEDGYPGGSDNYphosGSLSR.V	R.HYEDGYPGGSDNYphosGSLSR.V	-0.707941	1.03508	7	11	sp|O60716|CTND1_HUMAN	STYX	Q1	1	0.9991	0.995	0.995	YSRHYEDGYPGGSDNYGSLSRVTRIEERYRP
sp|Q9ULJ3|ZBT21_HUMAN_431 435	R.IKTphosEPSSphosPLSDPSDIIR.V	R.IKTphosEPSSphosPLSDPSDIIR.V	-0.707941	-1.32103	1	2	sp|Q9ULJ3|ZBT21_HUMAN	STYX	Q4	0.9906	0.9915	0.927	0.961	TDREGASPVTEVRIKTEPSSPLSDPSDIIRV GASPVTEVRIKTEPSSPLSDPSDIIRVTVGD
sp|O14497|ARI1A_HUMAN_1751	R.TLLDPGRFSphosK.V	R.TLLDPGRFSphosK.V	-0.707941	-0.358069	5	5	sp|O14497|ARI1A_HUMAN	STYX	CENTER	0.991	0.9947	0.998	0.998	VGDPGQRTLLDPGRFSKVSSPAPMEGGEEEE
sp|O15085|ARHGB_HUMAN_635	R.SRSphosDVDMDAAAEATR.L	R.SRSphosDVDMDAAAEATR.L	-0.707941	-0.193949	4	7	sp|O15085|ARHGB_HUMAN	STYX	CENTER	1	1	0.968	0.959	EMKRSRKAENVPRSRSDVDMDAAAEATRLHQ
sp|O15231|ZN185_HUMAN_465	R.RESphosCGSSVLTDFEGK.D	R.RESphosCGSSVLTDFEGK.D	-0.707941	-0.0188626	35	41	sp|O15231|ZN185_HUMAN	STYX	CENTER	1	1	0.997	0.997	RQSSPSGSEQLVRRESCGSSVLTDFEGKDVA
sp|O43719|HTSF1_HUMAN_616	K.VLDEEGSphosER.E	K.VLDEEGSphosER.E	-0.707941	0.456683	3	6	sp|O43719|HTSF1_HUMAN	STYX	CENTER	0.9997	0.9998	1	1	EFEDDGSEKVLDEEGSEREFDEDSDEKEEEE
sp|O43768|ENSA_HUMAN_108 109_C	R.K(SS)phosLVTSK.L	R.K(SS)phosLVTSK.L	-0.707941	0.456716	1	7	sp|O43768|ENSA_HUMAN	STYX	CENTER	0.9922	0.9999	0.891	0.998	TGDHIPTPQDLPQRKSSLVTSKLAGGQVE__ GDHIPTPQDLPQRKSSLVTSKLAGGQVE___
sp|O60244|MED14_HUMAN_1136 1144	R.MPGMSPANPSLHSphosPVPDASHSphosPR.A	R.MPGMSPANPSLHSphosPVPDASHSphosPR.A	-0.707941	-0.41118	1	1	sp|O60244|MED14_HUMAN	STYX	CENTER	0.9946	0.9908	0.933	0.972	AARMPGMSPANPSLHSPVPDASHSPRAGTSS PANPSLHSPVPDASHSPRAGTSSQTMPTNMP
sp|O75369|FLNB_HUMAN_2554	K.AGSNMLLIGVHGPTTphosPCEEVSMK.H	K.AGSNMLLIGVHGPTTphosPCEEVSMK.H	-0.707941	-0.504289	3	2	sp|O75369|FLNB_HUMAN	STYX	CENTER	1	1	0.975	0.949	KAGSNMLLIGVHGPTTPCEEVSMKHVGNQQY
sp|O75494|SRS10_HUMAN_106	R.NVYSphosSSR.Y	R.NVYSphosSSR.Y	-0.707941	-0.148146	5	1	sp|O75494|SRS10_HUMAN	STYX	CENTER	0.9976	0.9707	0.97	0.945	KTPNQMKAKEGRNVYSSSRYDDYDRYRRSRS
sp|O75925|PIAS1_HUMAN_510	R.TPSphosLPAVDTSYINTSLIQDYR.H	R.TPSphosLPAVDTSYINTSLIQDYR.H	-0.707941	-0.257375	5	3	sp|O75925|PIAS1_HUMAN	STYX	CENTER	0.9986	0.9994	0.995	0.996	ILSLPHQASPVSRTPSLPAVDTSYINTSLIQ
sp|O94913|PCF11_HUMAN_777	K.MIFEGPNKLSphosPR.L	K.MIFEGPNKLSphosPR.L	-0.707941	0.221088	9	15	sp|O94913|PCF11_HUMAN	STYX	CENTER	1	1	1	1	RDGPTKMIFEGPNKLSPRIDGPPTPASLRFD
sp|O95049|ZO3_HUMAN_164	R.SphosPGGGSEANGLALVSGFK.R	R.SphosPGGGSEANGLALVSGFK.R	-0.707941	0.149535	18	38	sp|O95049|ZO3_HUMAN	STYX	CENTER	1	1	0.995	0.998	PRPGRRGRAGSHGRRSPGGGSEANGLALVSG
sp|O95297|MPZL1_HUMAN_263	K.SESVVYphosADIR.K	K.SESVVYphosADIR.K	-0.707941	0.561513	5	1	sp|O95297|MPZL1_HUMAN	STYX	CENTER	0.9998	0.9999	0.998	0.998	GGHHSDKINKSESVVYADIRKN_________
sp|O95696|BRD1_HUMAN_885	R.RHTphosLEDR.S	R.RHTphosLEDR.S	-0.707941	0.255577	1	3	sp|O95696|BRD1_HUMAN	STYX	CENTER	0.995	0.9983	1	1	APKCGRGKPALVRRHTLEDRSELISCIENGN
sp|P08559|ODPA_HUMAN_293 300	R.YHGHSphosMSDPGVSphosYR.T	R.YHGHSphosMSDPGVSphosYR.T	-0.707941	0.123531	1	2	sp|P08559|ODPA_HUMAN	STYX	CENTER	0.9831	0.9932	0.933	0.922	GPILMELQTYRYHGHSMSDPGVSYRTREEIQ QTYRYHGHSMSDPGVSYRTREEIQEVRSKSD
sp|P08559|ODPA_HUMAN_293 300 301_C	R.YHGHSphosMSDPGV(SY)phosR.T	R.YHGHSphosMSDPGV(SY)phosR.T	-0.707941	0.105421	1	6	sp|P08559|ODPA_HUMAN	STYX	CENTER	0.9029	0.9969	0.947	0.981	GPILMELQTYRYHGHSMSDPGVSYRTREEIQ QTYRYHGHSMSDPGVSYRTREEIQEVRSKSD TYRYHGHSMSDPGVSYRTREEIQEVRSKSDP
sp|P0C7T5|ATX1L_HUMAN_615	R.TVLGSphosRELCDSEGK.S	R.TVLGSphosRELCDSEGK.S	-0.707941	0.343707	7	9	sp|P0C7T5|ATX1L_HUMAN	STYX	CENTER	1	0.9994	0.997	0.996	QLGPPRERPERTVLGSRELCDSEGKSQPAGE
sp|P12270|TPR_HUMAN_2116	R.GLQLTphosPGIGGMQQHFFDDEDR.T	R.GLQLTphosPGIGGMQQHFFDDEDR.T	-0.707941	0.159209	3	12	sp|P12270|TPR_HUMAN	STYX	CENTER	1	1	1	1	IQMTRRQSVGRGLQLTPGIGGMQQHFFDDED
sp|P12694|ODBA_HUMAN_337	R.IGHHSphosTSDDSSAYR.S	R.IGHHSphosTSDDSSAYR.S	-0.707941	0.0350762	6	11	sp|P12694|ODBA_HUMAN	STYX	CENTER	1	1	0.986	0.991	QPFLIEAMTYRIGHHSTSDDSSAYRSVDEVN
sp|P22626|ROA2_HUMAN_102	R.EESphosGKPGAHVTVK.K	R.EESphosGKPGAHVTVK.K	-0.707941	-0.118398	1	1	sp|P22626|ROA2_HUMAN	STYX	CENTER	0.998	0.9999	0.995	0.998	DGRVVEPKRAVAREESGKPGAHVTVKKLFVG
sp|P32322|P5CR1_HUMAN_278	R.ELQSMADQEQVSphosPAAIK.K	R.ELQSMADQEQVSphosPAAIK.K	-0.707941	-0.0606828	5	11	sp|P32322|P5CR1_HUMAN	STYX	CENTER	1	1	1	0.998	IRTRELQSMADQEQVSPAAIKKTILDKVKLD
sp|P51825|AFF1_HUMAN_750	K.LLSphosPLRDTPPPQSL.M	K.LLSphosPLRDTPPPQSLMVK.L	-0.707941	0.436817	5	1	sp|P51825|AFF1_HUMAN	STYX	CENTER	1	0.9999	0.997	0.996	RKDRLPLPLRDTKLLSPLRDTPPPQSLMVKI
sp|P62241|RS8_HUMAN_160	K.ISSphosLLEEQFQQGK.L	K.ISSphosLLEEQFQQGK.L	-0.707941	-0.323717	9	3	sp|P62241|RS8_HUMAN	STYX	CENTER	0.9998	1	0.986	0.978	IQKKYDERKKNAKISSLLEEQFQQGKLLACI
sp|P62316|SMD2_HUMAN_12	K.SEMTphosPEELQK.R	K.SEMTphosPEELQKR.E	-0.707941	-0.163253	15	19	sp|P62316|SMD2_HUMAN	STYX	CENTER	0.9999	1	0.996	0.995	____MSLLNKPKSEMTPEELQKREEEEFNTG
sp|P63279|UBC9_HUMAN_70 71_C	R.MLFKDDYP(SS)phosPPK.C	R.MLFKDDYP(SS)phosPPK.C	-0.707941	-0.0326684	3	9	sp|P63279|UBC9_HUMAN	STYX	CENTER	0.9989	1	0.996	0.998	GGLFKLRMLFKDDYPSSPPKCKFEPPLFHPN GLFKLRMLFKDDYPSSPPKCKFEPPLFHPNV
sp|P84098|RL19_HUMAN_12 13_C	R.LA(SS)phosVLR.C	R.LA(SS)phosVLR.C	-0.707941	-0.118398	1	1	sp|P84098|RL19_HUMAN	STYX	CENTER	0.9939	0.9418	1	1	____MSMLRLQKRLASSVLRCGKKKVWLDPN ___MSMLRLQKRLASSVLRCGKKKVWLDPNE
sp|Q03001|DYST_HUMAN_3968	R.QKSphosFSEDVISHK.G	R.QKSphosFSEDVISHK.G	-0.707941	-0.00518771	7	11	sp|Q03001|DYST_HUMAN	STYX	CENTER	0.999	0.9998	0.971	0.991	ADDINGLMTKLKRQKSFSEDVISHKGDLRYI
sp|Q03252|LMNB2_HUMAN_420	R.ATSSphosSSGSLSATGR.L	R.ATSSphosSSGSLSATGR.L	-0.707941	-0.0536452	7	6	sp|Q03252|LMNB2_HUMAN	STYX	CENTER	0.9965	0.9974	0.983	0.982	SPSPSSRVTVSRATSSSSGSLSATGRLGRSK
sp|Q08999|RBL2_HUMAN_966	R.DSSphosPVMR.S	R.DSSphosPVMR.S	-0.707941	0.16171	1	1	sp|Q08999|RBL2_HUMAN	STYX	CENTER	0.9635	0.9897	0.992	0.985	NSPTELNKDRTSRDSSPVMRSSSTLPVPQPS
sp|Q14738|2A5D_HUMAN_63	K.RPSNSTphosPPPTQLSK.L	K.RPSNSTphosPPPTQLSK.L	-0.707941	-0.193949	1	3	sp|Q14738|2A5D_HUMAN	STYX	CENTER	0.999	0.9999	0.935	0.991	AQSQPPSSNKRPSNSTPPPTQLSKIKYSGGP
sp|Q14739|LBR_HUMAN_97	R.RSphosASASHQADIK.E	R.RSphosASASHQADIK.E	-0.707941	0.0613077	3	1	sp|Q14739|LBR_HUMAN	STYX	CENTER	0.999	0.9999	0.541	0.461	SRSRSPGRPPKSARRSASASHQADIKEARRE
sp|Q15811|ITSN1_HUMAN_978	K.STSphosMDSGSSESPASLK.R	K.STSphosMDSGSSESPASLKR.V	-0.707941	-0.0606828	12	13	sp|Q15811|ITSN1_HUMAN	STYX	CENTER	0.9997	0.9974	0.996	0.996	KSYVKLISGPIRKSTSMDSGSSESPASLKRV
sp|Q5SY16|NOL9_HUMAN_487	R.LAAFADALEFADEEKESphosPVEFTGHK.L	R.LAAFADALEFADEEKESphosPVEFTGHK.L	-0.707941	-0.148146	2	1	sp|Q5SY16|NOL9_HUMAN	STYX	CENTER	1	0.9999	0.996	0.653	AAFADALEFADEEKESPVEFTGHKLIGVYTD
sp|Q5T1M5|FKB15_HUMAN_1195	K.AQPEEEDEDEVSphosMK.G	K.AQPEEEDEDEVSphosMK.G	-0.707941	-0.0326684	5	4	sp|Q5T1M5|FKB15_HUMAN	STYX	CENTER	1	1	1	1	LRPKAQPEEEDEDEVSMKGRPPPTPLFGDDD
sp|Q5VZL5|ZMYM4_HUMAN_1239 1240 1241_C	K.CGGVEQA(SSS)phosPR.S	K.CGGVEQA(SSS)phosPR.S	-0.707941	0.16171	7	7	sp|Q5VZL5|ZMYM4_HUMAN	STYX	CENTER	1	1	1	1.001	KEEQGDLKCGGVEQASSSPRSDPLGSTQDHA EEQGDLKCGGVEQASSSPRSDPLGSTQDHAL EQGDLKCGGVEQASSSPRSDPLGSTQDHALS
sp|Q5ZPR3|CD276_HUMAN_525	K.TALQPLKHSDSphosKEDDGQEIA.-	K.HSDSphosKEDDGQEIA.-	-0.707941	0.166735	9	4	sp|Q5ZPR3|CD276_HUMAN	STYX	CENTER	1	0.99	0.993	0.992	GEGSKTALQPLKHSDSKEDDGQEIA______
sp|Q6PJG2|EMSA1_HUMAN_461	R.RASphosQEANLLTL.A	R.RASphosQEANLLTLAQK.A	-0.707941	-0.0188626	33	26	sp|Q6PJG2|EMSA1_HUMAN	STYQ	CENTER	1	1	1	1	LRGGVIQSTRRRRRASQEANLLTLAQKAVEL
sp|Q8N7R7|CCYL1_HUMAN_23	R.RAGSphosAELY.C	R.RAGSphosAELYCAS.D	-0.707941	-0.504289	7	1	sp|Q8N7R7|CCYL1_HUMAN	STYX	CENTER	0.9933	0.9841	0.996	0.995	CVSPNASPKLGRRAGSAELYCASDIYEAVSG
sp|Q8N7R7|CCYL1_HUMAN_344	R.SFSphosADNFIGIQR.S	R.SFSphosADNFIGIQR.S	-0.707941	-0.089252	19	17	sp|Q8N7R7|CCYL1_HUMAN	STYX	CENTER	1	1	0.993	0.993	CEDKDLCRAAMRRSFSADNFIGIQRSKAILS
sp|Q8NG31|KNL1_HUMAN_578	R.IQQSLSphosNPLSISLTDR.K	R.IQQSLSphosNPLSISLTDRK.T	-0.707941	-0.579223	3	6	sp|Q8NG31|KNL1_HUMAN	STYX	CENTER	1	0.9981	0.822	0.995	NSVPHVSKERIQQSLSNPLSISLTDRKTELL
sp|Q8TE77|SSH3_HUMAN_16 17_C	R.SPPGSGA(ST)phosPVGPWDQAVQR.R	R.SPPGSGA(ST)phosPVGPWDQAVQR.R	-0.707941	0.0917445	1	8	sp|Q8TE77|SSH3_HUMAN	STYX	CENTER	1	1	0.881	0.988	MALVTVSRSPPGSGASTPVGPWDQAVQRRSR ALVTVSRSPPGSGASTPVGPWDQAVQRRSRL
sp|Q92621|NU205_HUMAN_1942	R.LQDSFASphosETNLDFR.S	R.LQDSFASphosETNLDFR.S	-0.707941	-0.603825	3	1	sp|Q92621|NU205_HUMAN	STYX	CENTER	1	1	0.992	0.619	SRTLFKSRRLQDSFASETNLDFRSGLAIVSQ
sp|Q92738|US6NL_HUMAN_716	R.IEVLPVDTGAGGYSGNSGSphosPK.N	R.IEVLPVDTGAGGYSGNSGSphosPK.N	-0.707941	-0.306843	7	10	sp|Q92738|US6NL_HUMAN	STYX	CENTER	0.9994	0.9996	0.992	0.994	LPVDTGAGGYSGNSGSPKNGKLIIPPVDYLP
sp|Q92844|TANK_HUMAN_208	R.GAPSphosITSVTPR.G	R.GAPSphosITSVTPR.G	-0.707941	0.58882	5	5	sp|Q92844|TANK_HUMAN	STYX	CENTER	0.9996	0.9998	0.995	0.996	LFKPQAKDDINRGAPSITSVTPRGLCRDEED
sp|Q9BTC0|DIDO1_HUMAN_1017 1018 1019_C	K.SILAKP(SSS)phosPDPR.Y	K.SILAKP(SSS)phosPDPR.Y	-0.707941	0.476049	3	8	sp|Q9BTC0|DIDO1_HUMAN	STYX	CENTER	0.9991	0.9999	0.999	1	VLTSVMVPKSILAKPSSSPDPRYLSVPPSPN LTSVMVPKSILAKPSSSPDPRYLSVPPSPNI TSVMVPKSILAKPSSSPDPRYLSVPPSPNIS
sp|Q9BWH2|FUND2_HUMAN_151	K.SphosNQIPTEVR.S	K.IRKSphosNQIPTEVR.S	-0.707941	-0.323717	7	21	sp|Q9BWH2|FUND2_HUMAN	STYX	CENTER	0.9997	0.9999	0.998	0.998	EKDMKKAKEQLKIRKSNQIPTEVRSKAEEVV
sp|Q9BXF6|RFIP5_HUMAN_395	R.SNSphosSSEAVLGQEELSAQAK.V	R.SNSphosSSEAVLGQEELSAQAK.V	-0.707941	0.0997818	4	5	sp|Q9BXF6|RFIP5_HUMAN	STYX	CENTER	1	1	0.987	0.982	PRSTDDTWPRGSRSNSSSEAVLGQEELSAQA
[truncated: 13,562 more rows]

## Sheet: SD4 ATRi Phosphoproteome
protein_site	cluster_pep	Median Ratio	PSMs	bestpp	ratios	bestprb	protein	phos_seq
sp|P48634|PRC2A_HUMAN_878	K.IQTphosPPPK.K	5.49368	1	0.9934	5.49368	1	sp|P48634|PRC2A_HUMAN	PLPWPPGSDEVAKIQTPPPKKEPPKEETAQL
sp|A6ND36|FA83G_HUMAN_610	R.RPSphosVASSVSEEYFEVR.E	5.49315	1	0.9998	5.49315	0.994	sp|A6ND36|FA83G_HUMAN	SHSGSSGRGPGPRRPSVASSVSEEYFEVREH
sp|A8MYZ6|FOXO6_HUMAN_210 214 215_C	K.QLQAPERSphosPDD(SS)phosPSAPAPGPVPAAAK.W	5.49315	1	0.9998	5.49315	0.517	sp|A8MYZ6|FOXO6_HUMAN	KGKASKKKQLQAPERSPDDSSPSAPAPGPVP SKKKQLQAPERSPDDSSPSAPAPGPVPAAAK KKKQLQAPERSPDDSSPSAPAPGPVPAAAKW
sp|H7C350|CC188_HUMAN_344	K.GLAGQLWLLTphosLR.L	-6.64	20	0.9958	-6.64,-6.64,-4.20574518188974,-6.64,-6.64,-6.64,-6.20574518188974,-6.64,-6.20574518188974,-6.64,-6.64,-4.0902679644698,-4.62078268116858,-4.3312760639736,-5.79070768261089,-6.64,-6.64,-6.64,-6.64,-6.64	1	sp|H7C350|CC188_HUMAN	KLGSSKGLAGQLWLLTLRLLLGALLVWTAAY
sp|C9JE40|PATL2_HUMAN_257 259	K.AEAYphosESphosVVR.L	5.49315	1	0.9673	5.49315	1	sp|C9JE40|PATL2_HUMAN	ESLKLVTPYIPKAEAYESVVRIEGSLGQVAV LKLVTPYIPKAEAYESVVRIEGSLGQVAVST
sp|C9JH25|PRRT4_HUMAN_533	R.AGAPLGGSphosGFK.G	5.49315	1	0.9993	5.49315	1	sp|C9JH25|PRRT4_HUMAN	CWGGRRRRAGAPLGGSGFKGATPLPQGRSPF
sp|O00330|ODPX_HUMAN_162	K.DVGPPPPVSKPSEPRPSphosPEPQISIPVKK.E	5.49315	1	0.9989	5.49315	0.807	sp|O00330|ODPX_HUMAN	VGPPPPVSKPSEPRPSPEPQISIPVKKEHIP
sp|O00515|LAD1_HUMAN_57	R.QASphosASERLPSVEEAEVPKPLPPASKDEDEDIQSILR.T	5.49315	1	0.9976	5.49315	0.333	sp|O00515|LAD1_HUMAN	DDEAPRLSQNGDRQASASERLPSVEEAEVPK
sp|O00571|DDX3X_HUMAN_269 275	K.QYPISphosLVLAPTphosR.E	5.49315	1	0.9516	5.49315	0.996	sp|O00571|DDX3X_HUMAN	MKENGRYGRRKQYPISLVLAPTRELAVQIYE YGRRKQYPISLVLAPTRELAVQIYEEARKFS
sp|O00763|ACACB_HUMAN_423 429	K.RISphosVPEDVYphosDK.G	5.49315	1	0.9632	5.49315	1	sp|O00763|ACACB_HUMAN	TVEWTEDDLQQGKRISVPEDVYDKGCVKDVD DDLQQGKRISVPEDVYDKGCVKDVDEGLEAA
sp|O14686|KMT2D_HUMAN_1819 1820	R.KELPTphosSphosQK.G	5.49315	1	0.9424	5.49315	1	sp|O14686|KMT2D_HUMAN	PKAKGDGGSERKELPTSQKGDDGPDIADEES KAKGDGGSERKELPTSQKGDDGPDIADEESR
sp|O43493|TGON2_HUMAN_263	R.KDHSphosKPISNPSDNK.E	-6.64	4	0.9901	-6.64,-6.64,-6.64,-6.64	0.625	sp|O43493|TGON2_HUMAN	SPNKVVPEQPSRKDHSKPISNPSDNKELPKA
sp|O14686|KMT2D_HUMAN_4359	K.PQGPTLEPPPGRVSphosPAAAQLADTLFSK.G	5.49315	1	0.9242	5.49315	0.987	sp|O14686|KMT2D_HUMAN	PKPQGPTLEPPPGRVSPAAAQLADTLFSKGL
sp|O14730|RIOK3_HUMAN_20	E.PGTAAAWGPSphosK.C	5.49315	1	0.9269	5.49315	0.976	sp|O14730|RIOK3_HUMAN	GVASPEPGTAAAWGPSKCPWAIPQNTISCSL
sp|O14733|MP2K7_HUMAN_35	R.IDLNLDISphosPQRPR.P	5.49315	1	0.9287	5.49315	1	sp|O14733|MP2K7_HUMAN	ENREARRRIDLNLDISPQRPRPTLQLPLAND
sp|O15027|SC16A_HUMAN_201	R.QNPHDGVVTPAASphosPSLPQPGLQMPGQWGPVQGGPQPSGQHR.S	5.49315	1	0.9999	5.49315	0.474	sp|O15027|SC16A_HUMAN	LSRQNPHDGVVTPAASPSLPQPGLQMPGQWG
sp|O15047|SET1A_HUMAN_901 904	R.KEPSphosEISphosEASEEK.R	5.49315	1	0.9624	5.49315	0.667	sp|O15047|SET1A_HUMAN	GALRLPSFKVKRKEPSEISEASEEKRPRPST RLPSFKVKRKEPSEISEASEEKRPRPSTPAE
sp|O15054|KDM6B_HUMAN_224	R.AAEPPVVQPVPPAALSGPSGEEGLSphosPGGK.R	5.49315	1	0.9991	5.49315	0.836	sp|O15054|KDM6B_HUMAN	VPPAALSGPSGEEGLSPGGKRRRGCNSEQTG
sp|O15143|ARC1B_HUMAN_310	K.KASphosSEGGTAAGAGLDSLHK.N	5.49315	1	1	5.49315	0.979	sp|O15143|ARC1B_HUMAN	GLTARERFQNLDKKASSEGGTAAGAGLDSLH
sp|O15234|CASC3_HUMAN_363	R.DPSphosPEADAPVLGSPEKEEAASEPPAAAPDAAPPPPDRPIEK.K	5.49315	1	1	5.49315	0.922	sp|O15234|CASC3_HUMAN	SYRSRRLEQTSVRDPSPEADAPVLGSPEKEE
sp|O95602|RPA1_HUMAN_505 508 513	R.TphosALSphosAVDMTphosQREAVAK.Q	-6.64	3	0.9747	-6.64,-6.64,-6.64	1	sp|O95602|RPA1_HUMAN	VHPGASMVINEDGSRTALSAVDMTQREAVAK GASMVINEDGSRTALSAVDMTQREAVAKQLL INEDGSRTALSAVDMTQREAVAKQLLTPATG
sp|O15446|RPA34_HUMAN_124	R.ILEGPQQSphosLSGSPLQPIPASPPPQIPPGLRPR.F	5.49315	1	0.9998	5.49315	0.25	sp|O15446|RPA34_HUMAN	SAPQGTLRILEGPQQSLSGSPLQPIPASPPP
sp|O43150|ASAP2_HUMAN_527	R.KDYITphosAK.Y	5.49315	1	0.9256	5.49315	0.983	sp|O43150|ASAP2_HUMAN	KPNPGSDMNARKDYITAKYIERRYARKKHAD
sp|O43194|GPR39_HUMAN_271 274	R.KSESphosEESphosR.T	5.49315	1	0.9345	5.49315	0.952	sp|O43194|GPR39_HUMAN	SLAGGTRPPQLRKSESEESRTARRQTIIFLR GGTRPPQLRKSESEESRTARRQTIIFLRLIV
sp|O43303|CP110_HUMAN_400	R.TSSACHILINNPINACELSphosPK.G	5.49315	1	0.9461	5.49315	0.997	sp|O43303|CP110_HUMAN	ACHILINNPINACELSPKGKEQAMDLIIQDT
sp|O43318|M3K7_HUMAN_471 472_C	R.MITTSGP(TS)phosEKPTR.S	5.49315	1	0.9912	5.49315	0.996	sp|O43318|M3K7_HUMAN	RSSSPSVRMITTSGPTSEKPTRSHPWTPDDS SSSPSVRMITTSGPTSEKPTRSHPWTPDDST
sp|O43395|PRPF3_HUMAN_608 609_C	R.IKWDEQ(TS)phosNTKGDDDEESDEEAVK.K	5.49315	1	0.9997	5.49315	0.467	sp|O43395|PRPF3_HUMAN	KFKRLMLHRIKWDEQTSNTKGDDDEESDEEA FKRLMLHRIKWDEQTSNTKGDDDEESDEEAV
sp|O43426|SYNJ1_HUMAN_1073	R.APSphosRTPGPPSAQSSPIDAQPATPLPQKDPAQPLEPK.R	5.49315	1	0.9665	5.49315	0.498	sp|O43426|SYNJ1_HUMAN	EGPVPSLPIRPSRAPSRTPGPPSAQSSPIDA
sp|O43491|E41L2_HUMAN_647 649	K.AQEDILKHQASphosISphosELK.R	5.49315	1	0.9929	5.49315	1	sp|O43491|E41L2_HUMAN	EELDKAQEDILKHQASISELKRNFMESTPEP LDKAQEDILKHQASISELKRNFMESTPEPRP
sp|O60271|JIP4_HUMAN_109	K.FIEFEDSphosQEQEKK.D	5.49315	1	0.9878	5.49315	1	sp|O60271|JIP4_HUMAN	ALRKHAEEKFIEFEDSQEQEKKDLQTRVESL
sp|P06748|NPM_HUMAN_78	K.DELHIVEAEAMNYEGSPIKVTLATphosLK.M	-6.64	4	0.9923	-6.64,-6.64,-6.64,-6.64	0.781	sp|P06748|NPM_HUMAN	EAMNYEGSPIKVTLATLKMSVQPTVSLGGFE
sp|O60271|JIP4_HUMAN_815	R.ETDYPAGEDLSESphosGQVDK.A	5.49315	1	1	5.49315	0.991	sp|O60271|JIP4_HUMAN	GARETDYPAGEDLSESGQVDKASLCGSMTSN
sp|O60293|ZC3H1_HUMAN_952 953_C	R.LDSSPV(SS)phosPR.K	5.49315	1	0.9969	5.49315	0.546	sp|O60293|ZC3H1_HUMAN	RFGPNKMMRLDSSPVSSPRKHSAELIAMEKR FGPNKMMRLDSSPVSSPRKHSAELIAMEKRR
sp|O60673|REV3L_HUMAN_1119	R.STSphosPINSSPPR.C	5.49315	1	0.9923	5.49315	0.98	sp|O60673|REV3L_HUMAN	SDVMSKLGFLSERSTSPINSSPPRCWSPTDP
[truncated: 29,935 more rows]

## Sheet: SD5 CHK1 Sensor Summary
Candidate	Sequence	Unphos PSMs	Phos PSMs
CHK1-1	RALERHNSDQGGAGAR	0	16
CHK1-2	AFNHNPSENGQAGAR	174	0
[truncated: 8 more rows]
